# Supplementary material for: Chiral phosphoric acid-catalyzed stereodivergent synthesis of trisubstituted allenes and computational mechanistic studies
Source: PubMed Central journal article supplement (PMC7608664; doi:10.1038/s41467-020-19294-8), 2020-11-02
Supplement: 41467_2020_19294_MOESM1_ESM.pdf [file 41467_2020_19294_MOESM1_ESM.pdf]

## **Supplementary Information**

**Chiral phosphoric acid-catalyzed stereodivergent synthesis of  
trisubstituted allenes and computational mechanistic studies**

**Wang et al.**

## Table of Contents

|                                                                                                |     |
|------------------------------------------------------------------------------------------------|-----|
| General Information:.....                                                                      | 3   |
| Supplementary Table S1. Screening of the R group on oxazolones and optimizations of solvents.. | 4   |
| Synthesis of catalyst ( <i>S</i> )-B2: .....                                                   | 7   |
| Synthesis of substrates: .....                                                                 | 7   |
| Asymmetric synthesis of products: .....                                                        | 14  |
| Mechanistic Study .....                                                                        | 41  |
| Derivatizations of chiral products: .....                                                      | 43  |
| Computational Studies .....                                                                    | 50  |
| X-Ray Structures .....                                                                         | 62  |
| HPLC traces: .....                                                                             | 72  |
| NMR Spectrums: .....                                                                           | 127 |
| Supplementary References.....                                                                  | 209 |

## General Information:

Unless otherwise noted, all commercial reagents were used without further purification. Dichloromethane, toluene, ether, THF were purified by passage through an activated alumina column under argon. Thin-layer chromatography (TLC) analysis of reaction mixtures was performed using Huanghai silica gel HSGF254 TLC plates, and visualized under UV or by staining with ceric ammonium molybdate or potassium permanganate. Flash column chromatography was carried out on Huanghai Silica Gel HHGJ-300, 300-400 mesh. Nuclear magnetic resonance (NMR) spectra were recorded using Bruker Avance III HD spectrometer (FT, 400 MHz for  $^1\text{H}$ , 101 MHz for  $^{13}\text{C}$ ).  $^1\text{H}$  and  $^{13}\text{C}$  chemical shifts are reported in ppm downfield of tetramethylsilane and referenced to residual solvent peak ( $\text{CHCl}_3$ ;  $\delta\text{H} = 7.26$  and  $\delta\text{C} = 77.16$ ,  $\text{CD}_3\text{OD}$ ,  $\delta\text{H} = 3.31$  and  $\delta\text{C} = 49.00$ ,  $(\text{CD}_3)_2\text{CO}$ ,  $\delta\text{H} = 2.05$  and  $\delta\text{C} = 29.84$ ). Multiplicities are reported using the following abbreviations: s = singlet, d = doublet, t = triplet, q = quartet, m = multiplet, br = broad resonance. FT-IR spectra were recorded on PerkinElmer Frontier FT-IR Spectrometer, and absorption frequencies are reported in reciprocal centimeters ( $\text{cm}^{-1}$ ). Mass spectral data were obtained from the Agilent Technologies 6230 TOF LC/MS spectrometer in electrospray ionization ( $\text{ESI}^+$ ) mode. Optical rotations were measured with an Autopol V Plus/VI digital polarimeter. X-Ray structure analyses were performed using a Bruker D8 Venture X-ray single crystal diffractometer. Enantiomeric excesses were determined on an Agilent 1260 Chiral HPLC using IA, IB, IC columns. The racemic products were synthesized by using ( $\pm$ )-A4 as catalyst.

Supplementary Table 1. Screening of the R group on oxazolones and optimizations of solvents

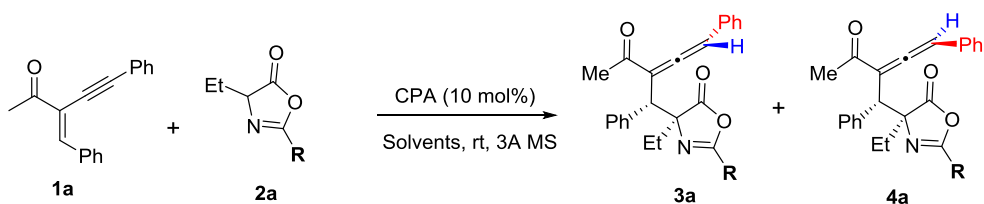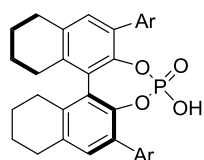

**B2**, Ar = 1-(4-Me-naphthyl)

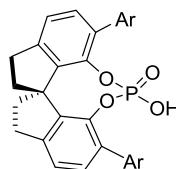

**C1**, Ar = 1-naphthyl

| Entry <sup>a</sup> | R                          | Catalyst  | Solvents         | yield (%) <sup>b</sup> | d.r. ( <b>3a:4a</b> ) <sup>b</sup> | ee (%) <sup>c</sup> |
|--------------------|----------------------------|-----------|------------------|------------------------|------------------------------------|---------------------|
| 1                  | 4-OMe-Ph                   | <b>B2</b> | toluene          | 91                     | 10:1                               | 87/-                |
| 2                  | Ph                         | <b>B2</b> | toluene          | 83                     | 1:1                                | 65/-                |
| 3                  | 4-F-Ph                     | <b>B2</b> | toluene          | 87                     | 5:1                                | 87/-                |
| 4                  | 4-CF <sub>3</sub> -Ph      | <b>B2</b> | toluene          | 97                     | 9:1                                | 90/-                |
| 5                  | 2,6-(OMe) <sub>2</sub> -Ph | <b>B2</b> | toluene          | 30                     | 2:1                                | 80/-                |
| 6                  | 3,5-(OMe) <sub>2</sub> -Ph | <b>B2</b> | toluene          | 99                     | 12:1                               | 91/-                |
| 7                  | 3,5-(OMe) <sub>2</sub> -Ph | <b>C1</b> | toluene          | 80                     | 1:9                                | -/94                |
| 8                  | 3,5-(OMe) <sub>2</sub> -Ph | <b>B2</b> | xylenes          | 92                     | 13:1                               | 90/-                |
| 9                  | 3,5-(OMe) <sub>2</sub> -Ph | <b>C1</b> | Xylenes          | 68                     | 1:6                                | -/87                |
| 10                 | 3,5-(OMe) <sub>2</sub> -Ph | <b>B2</b> | DCM              | 71%                    | 2.7: 1                             | 97/-                |
| 11                 | 3,5-(OMe) <sub>2</sub> -Ph | <b>C1</b> | DCM              | 64                     | 1:8                                | -/90                |
| 12                 | 3,5-(OMe) <sub>2</sub> -Ph | <b>B2</b> | CCl <sub>4</sub> | 98                     | 20:1                               | 91/-                |
| 13                 | 3,5-(OMe) <sub>2</sub> -Ph | <b>C1</b> | CCl <sub>4</sub> | 85                     | 1:12                               | -/98                |
| 14 <sup>d</sup>    | 3,5-(OMe) <sub>2</sub> -Ph | <b>B2</b> | CCl <sub>4</sub> | 67                     | 16:1                               | 90/-                |
| 15 <sup>e</sup>    | 3,5-(OMe) <sub>2</sub> -Ph | <b>B2</b> | CCl <sub>4</sub> | 63                     | 9:1                                | 94/-                |

<sup>a</sup>Reactions were carried with **1a** (0.15 mmol), **2a** (0.1 mmol), **cat** (0.01 mmol), solvents (1 mL) at ambient temperature for 24 h under N<sub>2</sub> atmosphere. <sup>b</sup>Yields and d.r. value were determined by crude <sup>1</sup>H NMR. <sup>c</sup>Ee values were determined by HPLC analysis on a chiral stationary phase. <sup>d</sup>Without 3 Å MS. <sup>e</sup>Under air.

a) scope for variants of the R<sup>3</sup> group under the catalysis of (*R*)-C1 catalyst

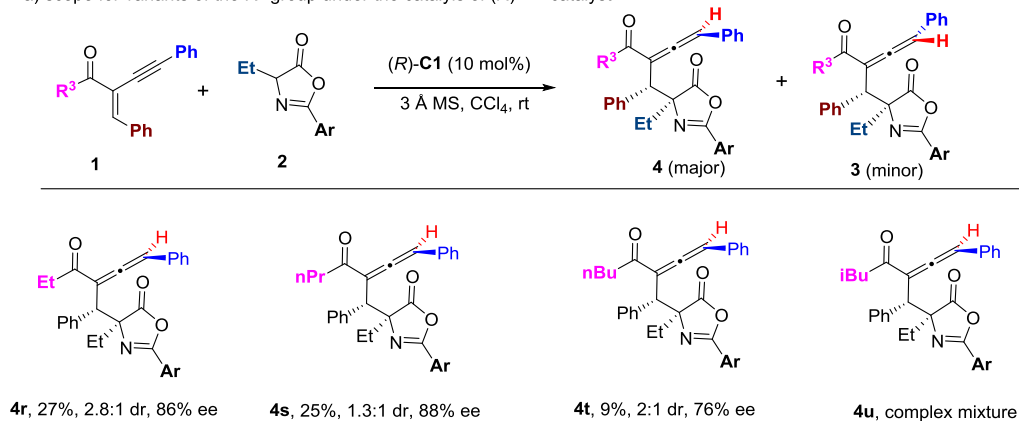

b) reactions of a secondary-alkyl group containing substrate under the standard asymmetric conditions

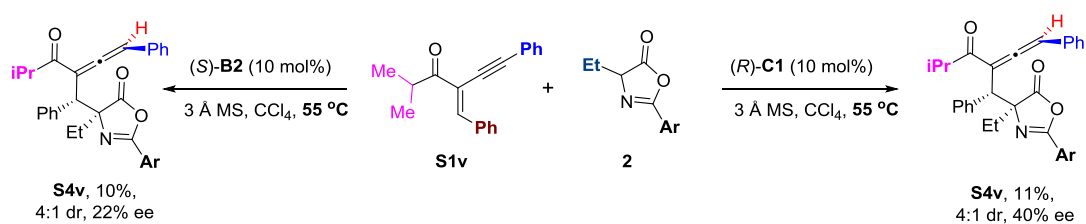

**Supplementary Figure 1. Scope for asymmetric synthesis of allene 4 with variants of the R<sup>3</sup> group of substrate 1.** Unless otherwise noted, reactions were performed with **1** (0.15 mmol), **2** (0.1 mmol), CPA (*R*)-C1 (0.01 mmol) and 3 Å MS (100 mg) in CCl<sub>4</sub> (0.5 mL) at RT for 24 h. Yields were combined isolated yields of allenes **3** and **4**. Dr values were determined by crude <sup>1</sup>H NMR analysis. Ee values were determined by HPLC analysis on a chiral stationary phase. Ar = 3,5-dimethoxyphenyl.

Stability of allene products at high temperature:

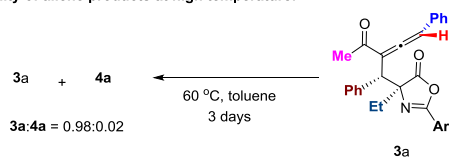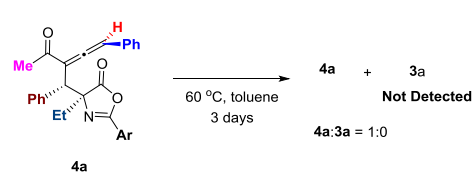

Stability of allene products with CPAs:

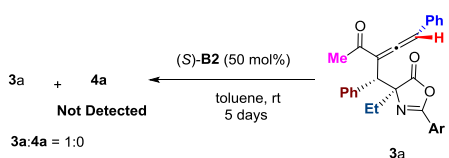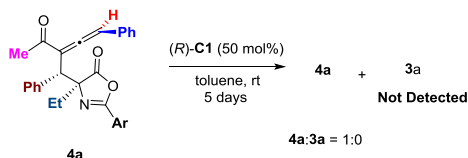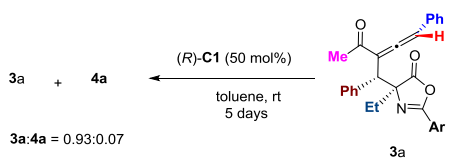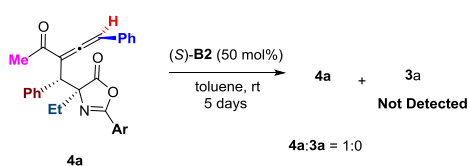

Stability of allene products with HOAc:

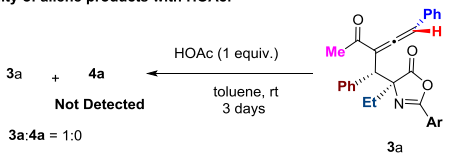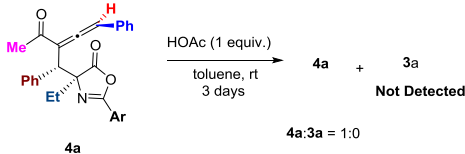

Stability of allene products with TFA:

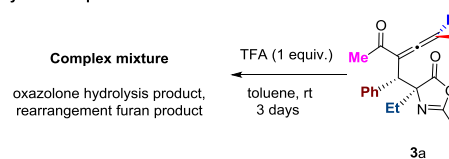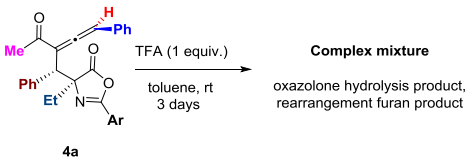

Stability of allene products with Et<sub>3</sub>N (1.0 equiv.):

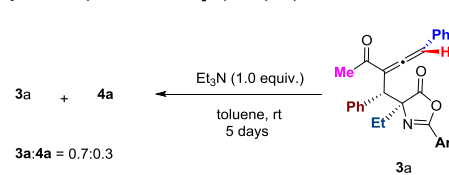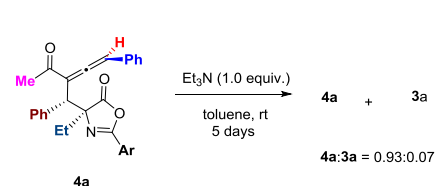

Stability of allene products with Et<sub>3</sub>N (solvent):

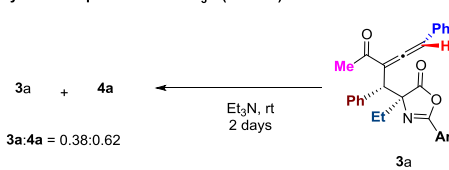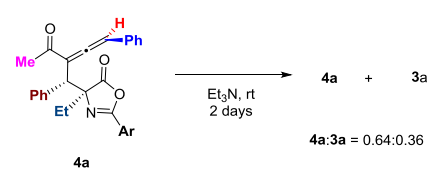

Stability of allene products with NaOH:

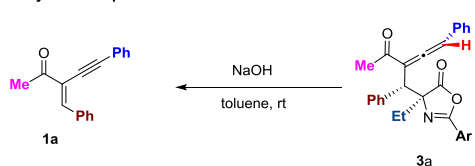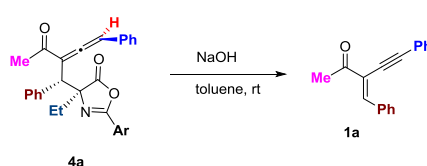

Supplementary Figure 2. Configurational stabilities of the allene products under various conditions.

## Synthesis of catalyst (S)-B2:

Catalyst (S)-B2 was synthesized by adopting the procedure reported by Akiyama<sup>1</sup>.

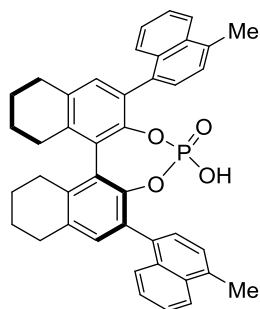

<sup>1</sup>H NMR (400 MHz, Acetone)  $\delta$  8.02 (t,  $J = 9.6$  Hz, 2H), 7.91 – 7.23 (m, 10H), 7.14 (d,  $J = 7.6$  Hz, 2H), 3.12 – 2.80 (m, 6H), 2.68 (s, 6H), 2.60 – 2.43 (m, 2H), 2.01 – 1.83 (m, 6H), 1.82 – 1.66 (m, 2H). <sup>13</sup>C NMR (126 MHz, CDCl<sub>3</sub>)  $\delta$  144.2, 144.2, 144.0, 143.9, 143.8, 143.8, 137.3, 137.3, 137.2, 137.2, 135.0, 135.0, 134.4, 134.4, 133.9, 133.7, 133.7, 133.0, 132.9, 132.9, 132.9, 132.4, 132.3, 132.3, 132.20, 132.1, 132.0, 132.0, 131.8, 131.6, 130.8, 130.8, 130.6, 130.6, 130.5, 130.4, 130.4, 128.1, 128.0, 127.9, 127.5, 127.5, 127.1, 127.1, 126.7, 126.7, 126.5, 126.4, 126.3, 126.2, 125.9, 125.8, 125.4, 125.4, 125.2, 125.1, 125.0, 124.9, 124.8, 124.8, 124.2, 124.2, 123.9, 123.8, 29.3, 29.3, 28.2, 28.1, 28.1, 28.1, 22.8, 22.8, 22.8, 22.7, 22.7, 19.4, 19.3, 19.2, 19.1. <sup>31</sup>P NMR (162 MHz, Acetone)  $\delta$  -2.03, -2.23. HRMS-ESI (m/z) calculated for C<sub>42</sub>H<sub>38</sub>O<sub>4</sub>P<sup>+</sup>: 637.2502; found: 637.2495,  $[\alpha]_D^{25} = 191.90$  (c 1.0, CHCl<sub>3</sub>). IR:  $\nu = 3051, 2932, 2858, 1715, 1586, 1504$  cm<sup>-1</sup>

## Synthesis of substrates:

Substrate **1a**<sup>2</sup>, **1b**<sup>3</sup>, **1d**<sup>2</sup>, **1e**<sup>4</sup>, **1f**<sup>3</sup>, **1k**<sup>3</sup>, **1l**<sup>3</sup>, **1n**<sup>3</sup>, **1o**<sup>5</sup>, **1q**<sup>6</sup>, **1r**<sup>7</sup> and **1t**<sup>8</sup> were synthesized according previous reports.

### General procedure A<sup>3</sup> for synthesis of 1,3-enynes **1**:

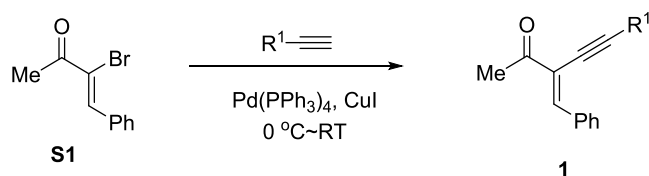

To a solution of **S1**<sup>3</sup> in anhydrous THF (0.2 M) was added Pd(PPh<sub>3</sub>)<sub>2</sub>Cl<sub>2</sub> (0.02 equiv.) and CuI (0.04 equiv.) at rt. The reaction mixture was cooled to 0 °C and degassed with argon. Alkyne (1.5 equiv.) and diisopropylamine (3.0 equiv.) was added and the mixture was stirred overnight at ambient temperature.

Upon completion, the reaction mixture was diluted with H<sub>2</sub>O (40 mL). The aqueous phase was extracted with Et<sub>2</sub>O for 3 times, washed with brine and the combined organic phase was dried over Na<sub>2</sub>SO<sub>4</sub>, filtered and concentrated under vacuum to give a residue, which was purified by flash column chromatography.

(*E*)-3-benzylidene-5-(4-chlorophenyl)pent-4-yn-2-one (**1c**)

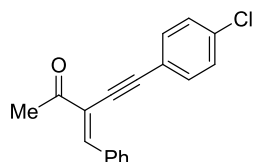

<sup>1</sup>H NMR (400 MHz, CDCl<sub>3</sub>) δ 8.06 (dd, *J* = 6.5, 2.8 Hz, 2H), 7.83 (s, 1H), 7.51 – 7.41 (m, 5H), 7.37 (d, *J* = 8.5 Hz, 2H), 2.60 (s, 3H). <sup>13</sup>C NMR (101 MHz, CDCl<sub>3</sub>) δ 196.1, 143.6, 135.2, 134.5, 132.7, 131.0, 130.8, 129.1, 128.8, 121.4, 119.9, 98.0, 88.0, 28.3. IR: ν = 3056, 2196, 1899, 1721, 1692, 1593, 1581, 1562cm<sup>-1</sup>. HRMS-ESI (*m/z*) calculated for C<sub>18</sub>H<sub>14</sub>ClO<sup>+</sup>: 281.0728; found: 281.0723 [M+H]<sup>+</sup>.

Methyl (*E*)-3-(3-benzylidene-4-oxopent-1-yn-1-yl)benzoate (**1g**)

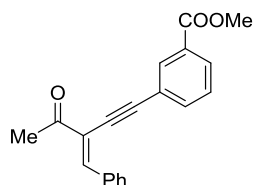

<sup>1</sup>H NMR (400 MHz, CDCl<sub>3</sub>) δ 8.21 (s, 1H), 8.13 – 8.00 (m, 3H), 7.85 (s, 1H), 7.71 (d, *J* = 7.7 Hz, 1H), 7.52 – 7.39 (m, 4H), 3.95 (s, 3H), 2.62 (s, 3H). <sup>13</sup>C NMR (101 MHz, CDCl<sub>3</sub>) δ 196.0, 166.3, 143.8, 135.6, 134.5, 132.5, 131.1, 130.9, 130.8, 129.9, 128.9, 128.8, 97.9, 87.9, 52.5, 28.3. IR: ν = 3061, 2951, 1722, 1692, 1599, 1583, 1563cm<sup>-1</sup>. HRMS-ESI (*m/z*) calculated for C<sub>20</sub>H<sub>17</sub>O<sub>3</sub><sup>+</sup>: 305.1172; found: 305.1169 [M+H]<sup>+</sup>.

(*E*)-3-benzylidene-5-(2-chlorophenyl)pent-4-yn-2-one (**1h**)

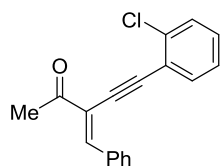

<sup>1</sup>H NMR (400 MHz, CDCl<sub>3</sub>) δ 8.16 (dd, *J* = 6.6, 2.8 Hz, 2H), 7.88 (s, 1H), 7.57 (dd, *J* = 7.2, 2.1 Hz, 1H), 7.50 – 7.40 (m, 4H), 7.36 – 7.27 (m, 2H), 2.67 (s, 3H). <sup>13</sup>C NMR (101 MHz, CDCl<sub>3</sub>) δ 196.2,



143.8, 136.1, 134.4, 133.4, 131.1, 131.0, 130.0, 129.7, 128.7, 126.8, 123.0, 119.6, 96.2, 92.0, 28.7. IR:  $\nu = 3060, 2196, 1692, 1591, 1581, 1562\text{cm}^{-1}$ . HRMS-ESI (m/z) calculated for  $\text{C}_{18}\text{H}_{14}\text{ClO}^+$ : 281.0728; found: 281.0724  $[\text{M}+\text{H}]^+$ .

(*E*)-3-benzylidene-5-(thiophen-3-yl)pent-4-yn-2-one (**1i**)

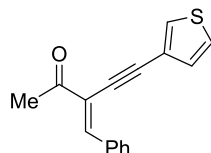

$^1\text{H}$  NMR (400 MHz,  $\text{CDCl}_3$ )  $\delta$  8.07 (dd,  $J = 6.5, 2.8$  Hz, 2H), 7.81 (s, 1H), 7.61 – 7.55 (m, 1H), 7.48 – 7.40 (m, 3H), 7.36 (dd,  $J = 4.9, 3.0$  Hz, 1H), 7.23 (dd,  $J = 5.0, 0.8$  Hz, 1H), 2.60 (s, 3H).  $^{13}\text{C}$  NMR (101 MHz,  $\text{CDCl}_3$ )  $\delta$  196.4, 143.0, 134.6, 130.9, 130.8, 129.6, 129.3, 128.7, 126.0, 122.0, 120.1, 94.6, 86.6, 28.3. IR:  $\nu = 3054, 2199, 1692, 1584, 1566\text{cm}^{-1}$ . HRMS-ESI (m/z) calculated for  $\text{C}_{16}\text{H}_{13}\text{OS}^+$ : 253.0682; found: 253.0678  $[\text{M}+\text{H}]^+$ .

(*E*)-3-benzylidene-5-(cyclohex-1-en-1-yl)pent-4-yn-2-one (**1j**)

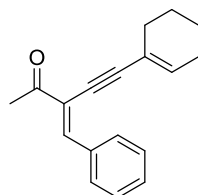

$^1\text{H}$  NMR (400 MHz,  $\text{CDCl}_3$ )  $\delta$  8.11 – 7.95 (m, 2H), 7.70 (s, 1H), 7.40 (d,  $J = 5.5$  Hz, 3H), 6.27 (s, 1H), 2.53 (s, 3H), 2.27 (d,  $J = 2.0$  Hz, 2H), 2.22 – 2.14 (m, 2H), 1.79 – 1.59 (m, 4H).  $^{13}\text{C}$  NMR (101 MHz,  $\text{CDCl}_3$ )  $\delta$  196.7, 141.5, 136.5, 134.8, 130.7, 130.5, 128.5, 120.8, 120.4, 101.5, 84.8, 28.7, 28.2, 26.0, 22.3, 21.5. IR:  $\nu = 3058, 3028, 2928, 2859, 2180, 1691, 1625, 1582, 1560\text{cm}^{-1}$ . HRMS-ESI (m/z) calculated for  $\text{C}_{18}\text{H}_{10}\text{O}^+$ : 251.1430; found: 251.1425  $[\text{M}+\text{H}]^+$ .

#### General procedure B for synthesis of 1,3-enynes **1**:

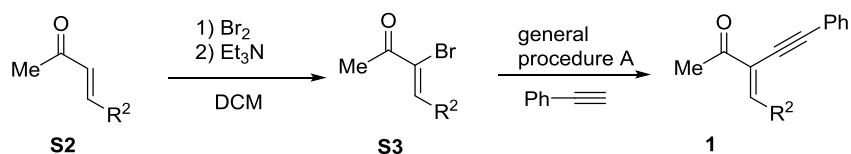

A solution of bromine (1.05 equiv.) in DCM (1 M) was added dropwise to a suspension of  $\alpha,\beta$ -unsaturated ketone **S2** (1.0 equiv.) in DCM (1 M) at 0 °C. The mixture was stirred for 30 min

before adding a solution of triethylamine (1.2 equiv.) in DCM (1 M) dropwisely at 0 °C. After stirring overnight at ambient temperature, the reaction mixture was diluted with H<sub>2</sub>O (30 mL). The aqueous phase was extracted with Et<sub>2</sub>O for 3 times and the combined organic phase was dried over Na<sub>2</sub>SO<sub>4</sub>, filtered and concentrated under vacuum to give a residue, which was purified by flash column chromatography to give **S3**.

The coupling of **S3** with phenylacetylene for the synthesis of **1** adopted the **general procedure A**.

(*E*)-3-(4-fluorobenzylidene)-5-phenylpent-4-yn-2-one (**1m**)

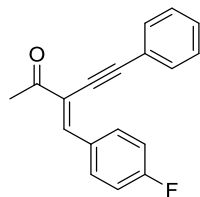

<sup>1</sup>H NMR (400 MHz, CDCl<sub>3</sub>) δ 8.11 (dd, *J* = 8.6, 5.6 Hz, 2H), 7.78 (s, 1H), 7.60 – 7.49 (m, 2H), 7.46 – 7.34 (m, 3H), 7.13 (t, *J* = 8.6 Hz, 2H), 2.61 (s, 3H). <sup>13</sup>C NMR (101 MHz, CDCl<sub>3</sub>) δ 196.2, 164.0 (d, *J* = 253.3 Hz), 141.6, 132.9 (d, *J* = 8.6 Hz), 131.5, 130.94 (d, *J* = 3.3 Hz), 129.2, 128.8, 122.8, 119.6 (d, *J* = 2.3 Hz), 115.9 (d, *J* = 21.7 Hz), 99.3, 86.9, 28.3. <sup>19</sup>F NMR (376 MHz, CDCl<sub>3</sub>) δ -107.71.

(*E*)-3-(naphthalen-2-ylmethylene)-5-phenylpent-4-yn-2-one (**1p**)

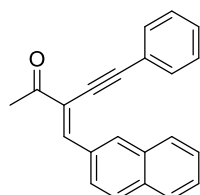

<sup>1</sup>H NMR (400 MHz, CDCl<sub>3</sub>) δ 8.57 (s, 1H), 8.25 (dd, *J* = 8.6, 1.3 Hz, 1H), 7.99 (s, 1H), 7.91 – 7.79 (m, 3H), 7.61 (dd, *J* = 6.4, 2.9 Hz, 2H), 7.58 – 7.48 (m, 2H), 7.48 – 7.37 (m, 3H), 2.66 (s, 3H). <sup>13</sup>C NMR (101 MHz, CDCl<sub>3</sub>) δ 196.4, 143.1, 134.5, 133.2, 132.3, 132.1, 131.5, 129.1, 129.0, 128.8, 128.3, 127.9, 127.8, 127.0, 126.7, 123.0, 120.1, 99.4, 87.5, 28.4. IR: ν = 3054, 1691, 1597, 1576, 1564 cm<sup>-1</sup>. HRMS-ESI (*m/z*) calculated for C<sub>22</sub>H<sub>17</sub>O<sup>+</sup>: 297.1274; found: 297.1268 [M+H]<sup>+</sup>.

**General procedure C for synthesis of 1,3-enynes 1:**

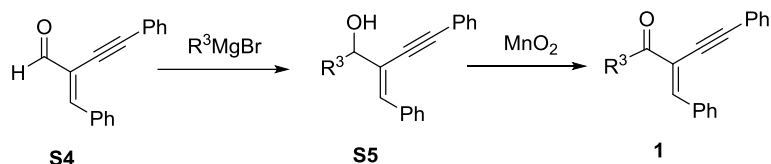

To a solution of **S4**<sup>9</sup> (1.0 equiv.) in dry THF (1.0 M) cooled to  $-78\text{ }^\circ\text{C}$  was added  $\text{R}^3\text{MgBr}$  (1.5 equiv.). The reaction was stirred at the same temperature for 10 min and then stirred overnight at room temperature. After completion, this reaction was quenched with saturated  $\text{NH}_4\text{Cl}$  (5 mL) and the resulting mixture was extracted with EtOAc for 3 times. The organic layer was washed with brine, dried over anhydrous  $\text{Na}_2\text{SO}_4$ , filtered and concentrated to give a residue, which was purified by flash column chromatography to give alcohol **S5**.

To the solution of **S5** (1.0 equiv.) in dry THF (1.0 M) was added  $\text{MnO}_2$  (20 equiv) at RT. After stirring at room temperature for 24 h, the reaction mixture was filtered through a short pad of Celite, which was rinsed with EtOAc. The combined organic layer was concentrated under reduced pressure, and the residue was purified by flash column chromatography to give substrate **1**.

(*E*)-3-benzylidene-1-phenylhept-1-yn-4-one (**1s**)

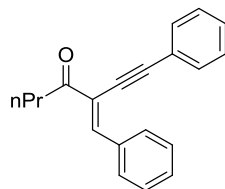

$^1\text{H}$  NMR (400 MHz,  $\text{CDCl}_3$ )  $\delta$  8.15 – 8.05 (m, 2H), 7.85 (s, 1H), 7.62 – 7.51 (m, 2H), 7.51 – 7.34 (m, 6H), 3.00 (t,  $J = 7.2$  Hz, 2H), 1.78 (dd,  $J = 14.6, 7.3$  Hz, 2H), 1.03 (t,  $J = 7.4$  Hz, 3H).  $^{13}\text{C}$  NMR (101 MHz,  $\text{CDCl}_3$ )  $\delta$  198.5, 142.9, 134.8, 131.5, 130.8, 130.7, 129.0, 128.7, 128.7, 123.0, 119.9, 99.2, 87.0, 42.4, 17.9, 14.0. IR:  $\nu = 2964, 1693, 1583, 1565\text{cm}^{-1}$ . HRMS-ESI ( $m/z$ ) calculated for  $\text{C}_{20}\text{H}_{19}\text{O}^+$ : 275.1430; found: 275.1423  $[\text{M}+\text{H}]^+$ .

(*E*)-3-benzylidene-6-methyl-1-phenylhept-1-yn-4-one (**1u**)

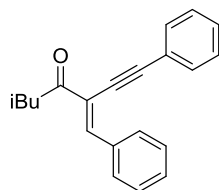

$^1\text{H}$  NMR (400 MHz,  $\text{CDCl}_3$ )  $\delta$  8.16 – 8.04 (m, 2H), 7.84 (s, 1H), 7.55 (dd,  $J = 6.4, 2.9$  Hz, 2H), 7.43 (m, 6H), 2.88 (d,  $J = 6.8$  Hz, 2H), 2.32 (qt,  $J = 13.0, 6.4$  Hz, 1H), 1.02 (d,  $J = 6.7$  Hz, 6H).  $^{13}\text{C}$  NMR (126 MHz, Chloroform- $d$ )  $\delta$  198.2, 143.0, 134.8, 131.5, 130.9, 130.8, 129.0, 128.8, 128.7, 123.0, 120.2, 99.2, 87.1, 49.2, 25.3, 22.9. IR:  $\nu = 2961, 1689, 1598, 1583, 1565\text{cm}^{-1}$ . HRMS-ESI ( $m/z$ ) calculated for  $\text{C}_{21}\text{H}_{21}\text{O}^+$ : 289.1587; found: : 289.1579  $[\text{M}+\text{H}]^+$ .

**General procedure for the synthesis of oxazolone **2**<sup>10</sup>:**

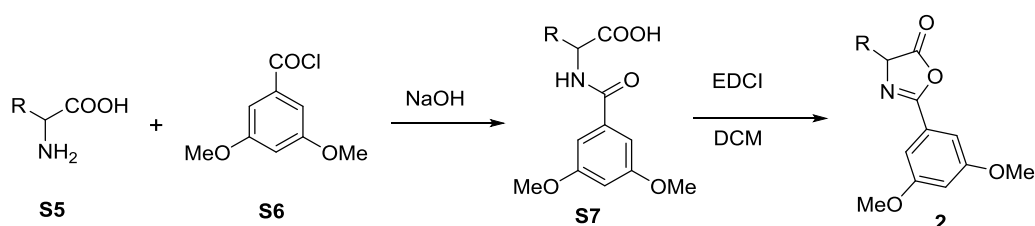

The amino acid **S5** (1 equiv) was dissolved in a 2 M solution of NaOH (4 equiv) in water. After cooling to 0 °C, and benzoyl chloride **S6** (1.1 equiv) was added dropwisely. The resulting mixture was allowed to warm to room temperature and stir for 24 h. Aqueous 6 M HCl solution was added to the reaction mixture until  $\text{pH} < 2$  (as monitored by pH paper), and the solution was extracted with DCM for 3 times. The combined organic layers were then dried over  $\text{Na}_2\text{SO}_4$ , filtered, and concentrated to give the acylated intermediate **S7**, which was used directly in the next step.

To a suspension of **S7** (1 equiv) in dry DCM (0.1 M) under  $\text{N}_2$  at 0 °C was added EDC HCl (1.3 equiv). After completion of the reaction, the mixture was diluted with DCM, and washed successively with  $\text{H}_2\text{O}$  then dried over anhydrous  $\text{Na}_2\text{SO}_4$  and concentrated under reduced pressure to give a residue, which was purified by flash column chromatography to give oxazolone **2**.

2-(3,5-dimethoxyphenyl)-4-ethyloxazol-5(4H)-one (**2a**)

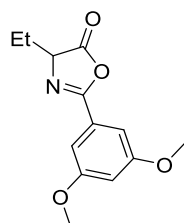

$^1\text{H}$  NMR (400 MHz,  $\text{CDCl}_3$ )  $\delta$  7.15 (d,  $J = 2.2$  Hz, 2H), 6.66 (t,  $J = 2.1$  Hz, 1H), 4.40 (t,  $J = 6.0$  Hz, 1H), 3.84 (d,  $J = 7.4$  Hz, 6H), 2.16 – 2.02 (m, 1H), 1.97 (dd,  $J = 14.1, 7.0$  Hz, 1H), 1.05 (t,  $J = 7.4$  Hz, 3H).  $^{13}\text{C}$  NMR (101 MHz,  $\text{CDCl}_3$ )  $\delta$  178.4, 161.8, 161.1, 127.7, 105.9, 105.5, 66.6, 55.8, 25.0, 9.6. IR:

$\nu = 3380, 2969, 1826, 1711, 1654, 1593, 1540 \text{ cm}^{-1}$ . HRMS-ESI ( $m/z$ ) calculated for  $\text{C}_{13}\text{H}_{16}\text{NO}_4^+$ : 250.1074; found: 250.1067  $[\text{M}+\text{H}]^+$ .

4-Butyl-2-(3,5-dimethoxyphenyl)oxazol-5(4H)-one (**2v**)

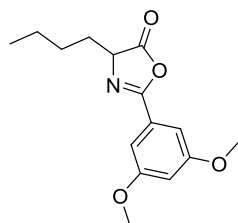

$^1\text{H}$  NMR (400 MHz,  $\text{CDCl}_3$ )  $\delta$  7.13 (s, 2H), 6.64 (d,  $J = 2.1$  Hz, 1H), 4.40 (t,  $J = 6.0$  Hz, 1H), 3.83 (s, 6H), 2.01 (dt,  $J = 10.6, 6.9$  Hz, 1H), 1.95 – 1.77 (m, 1H), 1.57 – 1.29 (m, 4H), 0.92 (t,  $J = 6.9$  Hz, 3H).  $^{13}\text{C}$  NMR (101 MHz,  $\text{CDCl}_3$ )  $\delta$  178.6, 161.6, 161.1, 127.7, 105.8, 105.5, 65.6, 55.8, 31.4, 27.4, 22.5, 13.9. IR:  $\nu = 2962, 1825, 1652, 1594 \text{ cm}^{-1}$ . HRMS-ESI ( $m/z$ ) calculated for  $\text{C}_{15}\text{H}_{20}\text{NO}_4^+$ : 278.1387; found: 278.1382  $[\text{M}+\text{H}]^+$ .

4-benzyl-2-(3,5-dimethoxyphenyl)oxazol-5(4H)-one (**2w**)

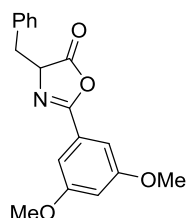

$^1\text{H}$  NMR (500 MHz,  $\text{CDCl}_3$ )  $\delta$  7.31 – 7.18 (m, 5H), 7.05 (s, 2H), 6.63 (s, 1H), 4.69 (t,  $J = 5.7$  Hz, 1H), 3.82 (s, 6H), 3.37 (dd,  $J = 13.9, 4.9$  Hz, 1H), 3.20 (dd,  $J = 13.9, 6.5$  Hz, 1H).  $^{13}\text{C}$  NMR (126 MHz,  $\text{CDCl}_3$ )  $\delta$  177.6, 161.8, 161.0, 135.3, 129.7, 128.6, 127.5, 127.4, 105.8, 105.6, 66.7, 55.8, 37.4. IR:  $\nu = 3058, 3027, 3006, 2929, 2832, 1694, 1628, 1602, 1596, 1528 \text{ cm}^{-1}$ . HRMS-ESI ( $m/z$ ) calculated for  $\text{C}_{18}\text{H}_{18}\text{NO}_4^+$ : 312.1230; found: 312.1227  $[\text{M}+\text{H}]^+$ .

2-(3,5-dimethoxyphenyl)-4-(2-(methylthio)ethyl)oxazol-5(4H)-one (**2x**)

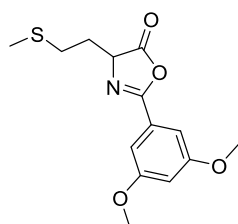

$^1\text{H}$  NMR (400 MHz,  $\text{CDCl}_3$ )  $\delta$  7.13 (s, 2H), 6.65 (d,  $J = 2.0$  Hz, 1H), 4.60 (t,  $J = 5.9$  Hz, 1H), 3.84 (s, 6H), 2.73 (t,  $J = 6.5$  Hz, 2H), 2.30 (dt,  $J = 12.6, 6.5$  Hz, 1H), 2.13 (m, 4H).  $^{13}\text{C}$  NMR (101 MHz,  $\text{CDCl}_3$ )  $\delta$  178.5, 162.1, 161.1, 127.6, 105.9, 105.6, 63.9, 55.8, 30.5, 30.2, 15.3. IR:  $\nu = 2920, 1825, 1706, 1651, 1596, 1527$   $\text{cm}^{-1}$ . HRMS-ESI ( $m/z$ ) calculated for  $\text{C}_{14}\text{H}_{18}\text{NO}_4\text{S}^+$ : 296.0951; found: 296.0945  $[\text{M}+\text{H}]^+$ .

tert-butyl (4-(2-(3,5-dimethoxyphenyl)-5-oxo-4,5-dihydrooxazol-4-yl)butyl)carbamate (**2y**)

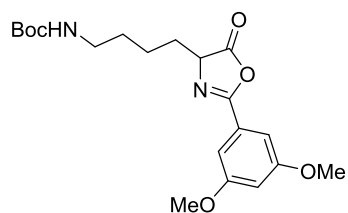

$^1\text{H}$  NMR (400 MHz, Chloroform-*d*)  $\delta$  7.14 (d,  $J = 2.4$  Hz, 2H), 6.66 (t,  $J = 2.4$  Hz, 1H), 4.53 (s, 1H), 4.40 (dd,  $J = 7.2, 5.5$  Hz, 1H), 3.85 (s, 6H), 3.14 (d,  $J = 7.3$  Hz, 2H), 2.04 (td,  $J = 8.9, 8.3, 4.2$  Hz, 1H), 1.94 – 1.82 (m, 1H), 1.56 – 1.48 (m, 4H), 1.43 (s, 9H).  $^{13}\text{C}$  NMR (101 MHz,  $\text{CDCl}_3$ )  $\delta$  178.3, 161.7, 161.0, 155.9, 127.5, 105.8, 105.5, 77.2, 65.4, 55.7, 40.2, 31.2, 29.7, 28.4, 22.6. IR:  $\nu = 3356, 3006, 2982, 2932, 2864, 2837, 1823, 1694, 1644, 1589, 1507$ . HRMS-ESI ( $m/z$ ) calculated for  $\text{C}_{20}\text{H}_{29}\text{N}_2\text{O}_6^+$ : 393.2020; found: 393.2016  $[\text{M}+\text{H}]^+$

### Asymmetric synthesis of products:

**General procedure for asymmetric synthesis of the chiral products:** To a dried 3 ml vial was added **1** (0.15 mmol), **2** (0.1 mmol), CPA catalyst (0.01 mmol) and activated 3 Å molecular sieves (100 mg). The vial was purged with  $\text{N}_2$  for 3 times and then followed by adding  $\text{CCl}_4$  (0.5 mL). After stirring for 24 h, the reaction mixture was quenched by adding  $\text{K}_2\text{CO}_3$ . After filtration, the filtrate was concentrated under vacuum to give a residue, which was purified by flash column chromatography to give the allene product **3** or **4**.

(*S*)-4-((*1R,3R*)-2-acetyl-1,4-diphenylbuta-2,3-dien-1-yl)-2-(3,5-dimethoxyphenyl)-4-ethyloxazol-5(4H)-one (**3a**)

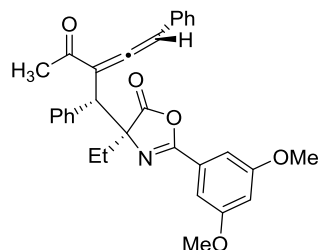

37 mg, 75% yield.  $^1\text{H}$  NMR (400 MHz,  $\text{CDCl}_3$ )  $\delta$  7.29 (m, 7H), 7.17 – 7.07 (m, 3H), 6.95 (d,  $J = 2.2$  Hz, 2H), 6.93 (s, 1H), 6.58 (t,  $J = 2.2$  Hz, 1H), 4.71 (s, 1H), 3.70 (s, 6H), 2.27 (s, 3H), 2.04 (td,  $J = 12.3, 6.8$  Hz, 2H), 0.80 (t,  $J = 7.4$  Hz, 3H).  $^{13}\text{C}$  NMR (101 MHz,  $\text{CDCl}_3$ )  $\delta$  217.0, 196.7, 178.7, 160.9, 160.4, 137.2, 131.7, 130.0, 129.2, 128.4, 128.3, 127.8, 127.5, 127.5, 112.1, 105.8, 105.3, 101.3, 77.9, 55.6, 48.5, 29.4, 27.0, 8.5.  $[\alpha]_{\text{D}}^{25} = 63.4$  (c 1.0,  $\text{CHCl}_3$ ). IR:  $\nu = 2971, 2938, 2841, 1928, 1825, 1805, 1680, 1653, 1596$   $\text{cm}^{-1}$ . HRMS-ESI ( $m/z$ ) calculated for  $\text{C}_{31}\text{H}_{30}\text{NO}_5^+$ : 496.2118; found: 496.2108  $[\text{M}+\text{H}]^+$ . HPLC: Chiralpak IA column, 90:10 hexanes/isopropanol, 1 ml/min;  $t_{\text{R}} = 5.8$  min (major), 10.5 min (minor); 91% ee.

(*S*)-4-((*1R,3R*)-2-acetyl-1-phenyl-4-(*p*-tolyl)buta-2,3-dien-1-yl)-2-(3,5-dimethoxyphenyl)-4-ethyloxazole-1,5-dione (**3b**)

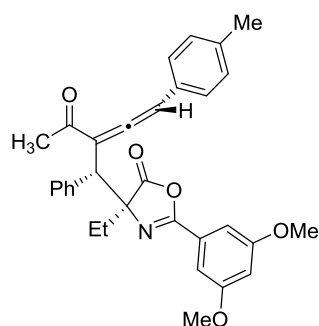

34 mg, 67% yield.  $^1\text{H}$  NMR (400 MHz,  $\text{CDCl}_3$ )  $\delta$  7.38 – 7.29 (m, 2H), 7.20 – 7.05 (m, 7H), 6.95 (d,  $J = 2.3$  Hz, 2H), 6.90 (s, 1H), 6.59 (t,  $J = 2.2$  Hz, 1H), 4.71 (s, 1H), 4.71 (s, 1H), 3.71 (s, 6H), 2.36 (s, 3H), 2.26 (s, 3H), 2.13 – 1.92 (m, 2H), 0.80 (t,  $J = 7.4$  Hz, 3H).  $^{13}\text{C}$  NMR (101 MHz,  $\text{CDCl}_3$ )  $\delta$  216.8, 196.8, 178.7, 160.9, 160.3, 138.4, 137.3, 130.0, 129.8, 128.6, 128.2, 127.8, 127.6, 127.4, 112.1, 105.7, 105.3, 101.2, 77.9, 55.6, 48.5, 29.4, 26.9, 21.4, 8.4.  $[\alpha]_{\text{D}}^{25} = 44.80$  (c 1.0,  $\text{CHCl}_3$ ). IR:  $\nu = 3006, 2989, 1718, 1663, 1595$   $\text{cm}^{-1}$ . HRMS-ESI ( $m/z$ ) calculated for  $\text{C}_{32}\text{H}_{32}\text{NO}_5^+$ : 510.2275; found: 510.2271  $[\text{M}+\text{H}]^+$ . HPLC: Chiralpak IA column, 90:10 hexanes/isopropanol, 1 ml/min;  $t_{\text{R}} = 5.5$  min (major), 9.1 min (minor); 91% ee.

(*S*)-4-((*1R,3R*)-2-acetyl-4-(4-chlorophenyl)-1-phenylbuta-2,3-dien-1-yl)-2-(3,5-dimethoxyphenyl)-4-ethyloxazol-5(4H)-one (**3c**)

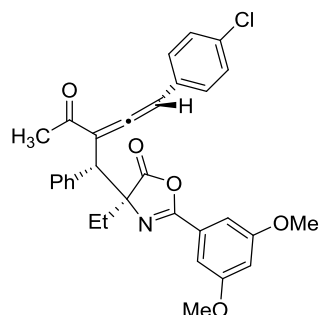

34 mg, 64% yield.  $^1\text{H}$  NMR (400 MHz,  $\text{CDCl}_3$ )  $\delta$  7.30 (m, 4H), 7.20 – 7.07 (m, 5H), 6.94 (d,  $J = 2.3$  Hz, 2H), 6.89 (s, 1H), 6.60 (t,  $J = 2.2$  Hz, 1H), 4.70 (s, 1H), 3.73 (s, 6H), 2.26 (s, 3H), 2.03 (dd,  $J = 7.7$ , 3.6 Hz, 2H), 0.80 (t,  $J = 7.4$  Hz, 3H).  $^{13}\text{C}$  NMR (101 MHz,  $\text{CDCl}_3$ )  $\delta$  216.9, 196.3, 178.6, 161.0, 160.4, 137.2, 134.2, 130.2, 129.8, 129.4, 128.6, 128.4, 127.9, 127.5, 112.4, 105.6, 105.4, 100.4, 77.8, 55.6, 48.5, 29.4, 27.0, 8.4.  $[\alpha]_{\text{D}}^{25} = 44.30$  (c 1.0,  $\text{CHCl}_3$ ). IR:  $\nu = 3006, 2989, 1805, 1683, 1599\text{ cm}^{-1}$ . HRMS-ESI ( $m/z$ ) calculated for  $\text{C}_{31}\text{H}_{29}\text{NO}_5\text{Cl}^+$ : 530.1729; found 530.1725  $[\text{M}+\text{H}]^+$ . HPLC: Chiralpak IA column, 90:10 hexanes/isopropanol, 1 ml/min;  $t_{\text{R}} = 6.0$  min (major), 8.9 min (minor); 90% ee.

(*S*)-4-((*1R,3R*)-2-acetyl-4-(4-methoxyphenyl)-1-phenylbuta-2,3-dien-1-yl)-2-(3,5-dimethoxyphenyl)-4-ethyloxazol-5(4H)-one (**3d**)

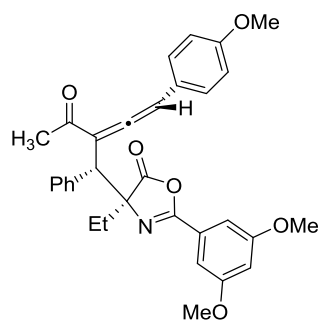

28 mg, 53% yield.  $^1\text{H}$  NMR (400 MHz,  $\text{CDCl}_3$ )  $\delta$  7.38 – 7.29 (m, 2H), 7.21 – 7.08 (m, 5H), 6.96 (d,  $J = 2.3$  Hz, 2H), 6.87 (d,  $J = 4.1$  Hz, 2H), 6.85 (s, 1H), 6.59 (t,  $J = 2.3$  Hz, 1H), 4.71 (s, 1H), 3.82 (s, 3H), 3.72 (s, 6H), 2.25 (s, 3H), 2.10 – 1.94 (m, 2H), 0.79 (t,  $J = 7.4$  Hz, 3H).  $^{13}\text{C}$  NMR (101 MHz,  $\text{CDCl}_3$ )  $\delta$  216.6, 196.9, 178.7, 160.9, 160.3, 159.8, 137.4, 130.0, 128.8, 128.3, 127.8, 127.6, 123.7, 114.6, 112.2, 105.7, 105.3, 100.9, 77.8, 55.6, 55.5, 48.4, 29.4, 26.9, 8.5.  $[\alpha]_{\text{D}}^{25} = 62.5$  (c 1.0,  $\text{CHCl}_3$ ). IR:  $\nu = 3006, 2989, 1945, 1805, 1673, 1595\text{ cm}^{-1}$ . HRMS-ESI ( $m/z$ ) calculated for  $\text{C}_{32}\text{H}_{32}\text{NO}_6^+$ : 526.2224; found: 526.2218  $[\text{M}+\text{H}]^+$ . HPLC: Chiralpak IA column, 90:10 hexanes/isopropanol, 1 ml/min;  $t_{\text{R}} = 6.9$  min



(major), 14.0 min (minor); 91% ee.

(*S*)-4-((*1R,3R*)-2-acetyl-4-(4-fluorophenyl)-1-phenylbuta-2,3-dien-1-yl)-2-(3,5-dimethoxyphenyl)-4-ethyloxazol-5(4H)-one (**3e**)

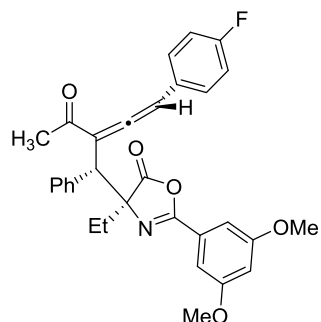

32 mg, 62% yield.  $^1\text{H}$  NMR (500 MHz,  $\text{CDCl}_3$ )  $\delta$  7.34 – 7.24 (m, 3H), 7.19 – 7.09 (m, 3H), 7.02 (d,  $J$  = 7.7 Hz, 1H), 6.98 (td,  $J$  = 8.5, 2.3 Hz, 1H), 6.95 (d,  $J$  = 2.0 Hz, 2H), 6.91 (m, 2H), 6.60 (s, 1H), 4.71 (s, 1H), 3.72 (s, 6H), 2.27 (s, 3H), 2.13 – 1.93 (m, 2H), 0.80 (t,  $J$  = 7.4 Hz, 3H).  $^{13}\text{C}$  NMR (126 MHz,  $\text{CDCl}_3$ )  $\delta$  217.0, 196.2, 178.6, 163.3 (d,  $J$  = 246.8 Hz), 161.0, 160.5, 137.1, 134.1 (d,  $J$  = 7.9 Hz), 130.6 (d,  $J$  = 8.4 Hz), 129.8, 128.4, 127.9, 127.5, 123.2 (d,  $J$  = 2.9 Hz), 115.3 (d,  $J$  = 21.3 Hz), 114.1 (d,  $J$  = 22.6 Hz), 112.4, 105.7, 105.4, 100.6 (d,  $J$  = 2.7 Hz), 77.8, 55.6, 48.5, 29.4, 27.0, 8.4.  $^{19}\text{F}$  NMR (471 MHz,  $\text{CDCl}_3$ )  $\delta$  -112.36.  $[\alpha]_{\text{D}}^{25}$  = 42.5 (c 1.0,  $\text{CHCl}_3$ ). IR:  $\nu$  = 3058, 2977, 1805, 1683, 1654, 1589  $\text{cm}^{-1}$ . HRMS-ESI ( $m/z$ ) calculated for  $\text{C}_{31}\text{H}_{29}\text{FNO}_5^+$ : 514.2024; found: 514.2016  $[\text{M}+\text{H}]^+$ . HPLC: Chiralpak IA column, 90:10 hexanes/isopropanol, 1 ml/min;  $t_{\text{R}}$  = 5.9 min (major), 9.6 min (minor); 90% ee.

(*S*)-4-((*1R,3R*)-2-acetyl-1-phenyl-4-(4-(trifluoromethyl)phenyl)buta-2,3-dien-1-yl)-2-(3,5-dimethoxyphenyl)-4-ethyloxazol-5(4H)-one (**3f**)

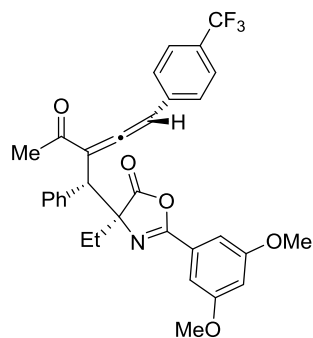

33 mg, 59% yield.  $^1\text{H}$  NMR (400 MHz,  $\text{CDCl}_3$ )  $\delta$  7.59 (d,  $J$  = 8.1 Hz, 2H), 7.35 (d,  $J$  = 8.0 Hz, 2H), 7.30 (d,  $J$  = 6.7 Hz, 2H), 7.20 – 7.06 (m, 3H), 6.96 (s, 1H), 6.92 (d,  $J$  = 2.3 Hz, 2H), 6.59 (d,  $J$  = 2.2 Hz,

1H), 4.71 (s, 1H), 3.71 (s, 6H), 2.27 (s, 3H), 2.05 (ddd,  $J = 10.0, 6.8, 2.7$  Hz, 2H), 0.81 (t,  $J = 7.4$  Hz, 3H).  $^{13}\text{C}$  NMR (101 MHz,  $\text{CDCl}_3$ )  $\delta$  217.4, 196.0, 178.5, 161.0, 160.5, 137.0, 135.6, 130.2 (q,  $J = 32.7$  Hz), 129.8, 128.4, 128.0, 127.6, 127.4, 126.1 (q,  $J = 3.8$  Hz), 124.1 (q,  $J = 272.1$  Hz), 112.5, 105.5, 105.4, 100.4, 77.8, 55.6, 48.6, 29.4, 27.1, 8.4.  $^{19}\text{F}$  NMR (376 MHz,  $\text{CDCl}_3$ )  $\delta$  -62.62.  $[\alpha]_{\text{D}}^{25} = -31.60$  (c 1.0,  $\text{CHCl}_3$ ). IR:  $\nu = 2966, 2928, 2032, 1928, 1805, 1683, 1653, 1595$   $\text{cm}^{-1}$ . HRMS-ESI ( $m/z$ ) calculated for  $\text{C}_{32}\text{H}_{29}\text{F}_3\text{NO}_5^+$ : 564.1992; found: 564.1991  $[\text{M}+\text{H}]^+$ . HPLC: Chiralpak IA column, 90:10 hexanes/isopropanol, 1 ml/min;  $t_{\text{R}} = 5.6$  min (major), 8.1 min (minor); 88% ee.

Methyl3-((*R*)-3-((*R*)-((*S*)-2-(3,5-dimethoxyphenyl)-4-ethyl-5-oxo-4,5-dihydrooxazol-4-yl)(phenyl)methyl)-4-oxopenta-1,2-dien-1-yl)benzoate (**3g**)

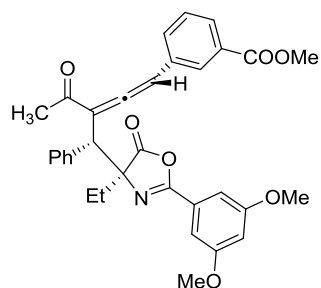

36 mg, 65% yield.  $^1\text{H}$  NMR (400 MHz,  $\text{CDCl}_3$ )  $\delta$  7.97 (d,  $J = 4.6$  Hz, 2H), 7.43 – 7.35 (m, 2H), 7.34 – 7.29 (m, 2H), 7.13 (m, 3H), 6.96 (s, 1H), 6.92 (d,  $J = 2.3$  Hz, 2H), 6.58 (t,  $J = 2.2$  Hz, 1H), 4.71 (s, 1H), 3.88 (s, 3H), 3.69 (s, 6H), 2.27 (s, 3H), 2.15 – 1.96 (m, 2H), 0.80 (t,  $J = 7.4$  Hz, 3H).  $^{13}\text{C}$  NMR (126 MHz,  $\text{CDCl}_3$ )  $\delta$  216.9, 196.3, 178.6, 166.6, 160.9, 160.5, 137.1, 132.3, 131.5, 131.2, 129.9, 129.4, 129.2, 128.5, 128.3, 127.9, 127.5, 112.4, 105.6, 105.4, 100.7, 77.8, 55.6, 52.4, 48.6, 29.4, 27.1, 8.4.  $[\alpha]_{\text{D}}^{25} = 18.00$  (c 1.0,  $\text{CHCl}_3$ ). IR:  $\nu = 2965, 2842, 1932, 1825, 1805, 1722, 1680, 1653, 1596$   $\text{cm}^{-1}$ . HRMS-ESI ( $m/z$ ) calculated for  $\text{C}_{33}\text{H}_{32}\text{NO}_7^+$ : 554.2173; found: 554.2166  $[\text{M}+\text{H}]^+$ . HPLC: Chiralpak IA column, 90:10 hexanes/isopropanol, 1 ml/min;  $t_{\text{R}} = 7.8$  min (major), 22.9 min (minor); 90% ee.

(*S*)-4-((*1R,3R*)-2-acetyl-4-(2-chlorophenyl)-1-phenylbuta-2,3-dien-1-yl)-2-(3,5-dimethoxyphenyl)-4-ethyl-5-oxo-4,5-dihydrooxazol-5(4H)-one (**3h**)

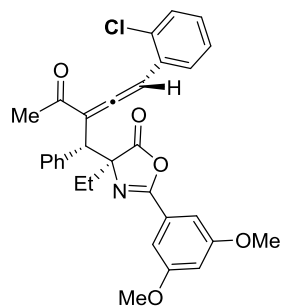

34 mg, 64% yield.  $^1\text{H}$  NMR (500 MHz,  $\text{CDCl}_3$ )  $\delta$  7.42 (d,  $J = 7.3$  Hz, 2H), 7.28 (d,  $J = 7.3$  Hz, 2H), 7.25 (s, 1H), 7.23 – 7.16 (m, 1H), 7.15 – 7.05 (m, 4H), 6.99 (d,  $J = 1.9$  Hz, 2H), 6.59 (s, 1H), 4.71 (s, 1H), 3.75 (s, 6H), 2.30 (d,  $J = 8.9$  Hz, 3H), 2.04 (q,  $J = 7.3$  Hz, 2H), 0.80 (t,  $J = 7.4$  Hz, 3H).  $^{13}\text{C}$  NMR (126 MHz,  $\text{CDCl}_3$ )  $\delta$  218.0, 196.3, 178.6, 161.0, 160.5, 137.3, 132.6, 130.2, 129.8, 129.6, 129.4, 128.6, 128.4, 127.9, 127.5, 127.3, 112.4, 106.0, 105.3, 97.6, 77.9, 55.7, 48.3, 29.5, 27.1, 8.4. IR:  $\nu = 2965$ , 2842, 1932, 1825, 1805, 1722, 1680, 1653, 1596  $\text{cm}^{-1}$ .  $[\alpha]_{\text{D}}^{25} = 28.40$  (c 1.0,  $\text{CHCl}_3$ ). HRMS-ESI ( $m/z$ ) calculated for  $\text{C}_{31}\text{H}_{29}\text{ClNO}_5^+$ : 530.1729; found: 530.1733  $[\text{M}+\text{H}]^+$ . HPLC: Chiralpak IC column, 95:05 hexanes/isopropanol, 1 ml/min;  $t_{\text{R}} = 16.9$  min (minor), 25.6 min (major); 90% ee.

(*S*)-4-((*1R,3R*)-2-acetyl-1-phenyl-4-(thiophen-3-yl)buta-2,3-dien-1-yl)-2-(3,5-dimethoxyphenyl)-4-ethylloxazol-5(4H)-one (**3i**)

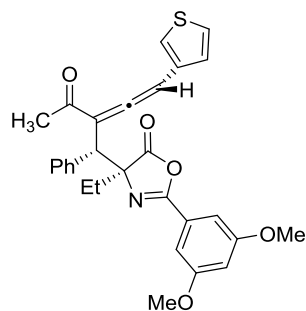

28 mg, 56% yield.  $^1\text{H}$  NMR (400 MHz,  $\text{CDCl}_3$ )  $\delta$  7.26 (dd,  $J = 7.4$ , 1.7 Hz, 2H), 7.22 (dd,  $J = 4.9$ , 3.0 Hz, 1H), 7.15 (d,  $J = 1.8$  Hz, 1H), 7.07 (t,  $J = 5.8$  Hz, 3H), 6.93 (s, 1H), 6.89 (d,  $J = 2.3$  Hz, 2H), 6.82 (dd,  $J = 5.0$ , 0.9 Hz, 1H), 6.53 (t,  $J = 2.3$  Hz, 1H), 4.63 (s, 1H), 3.67 (s, 6H), 2.19 (s, 3H), 2.03 – 1.87 (m, 2H), 0.72 (t,  $J = 7.4$  Hz, 3H).  $^{13}\text{C}$  NMR (101 MHz,  $\text{CDCl}_3$ )  $\delta$  217.3, 196.6, 178.7, 160.9, 160.4, 137.3, 132.3, 129.9, 128.3, 127.8, 127.5, 126.9, 126.3, 123.2, 111.4, 105.7, 105.4, 95.9, 77.8, 55.6, 48.3, 29.4, 27.0, 8.4.  $[\alpha]_{\text{D}}^{25} = 33.50$  (c 1.0,  $\text{CHCl}_3$ ). IR:  $\nu = 3006$ , 2989, 2032, 1932, 1802, 1680, 1654, 1599  $\text{cm}^{-1}$ . HRMS-ESI ( $m/z$ ) calculated for  $\text{C}_{29}\text{H}_{28}\text{NO}_5\text{S}^+$ : 502.1683; found: 502.1672  $[\text{M}+\text{H}]^+$ . HPLC: Chiralpak IA column, 90:10 hexanes/isopropanol, 1 ml/min;  $t_{\text{R}} = 6.7$  min (major), 12.0 min (minor); 92%

ee.

(*S*)-4-((*1R,3R*)-2-acetyl-4-(cyclohex-1-en-1-yl)-1-phenylbuta-2,3-dien-1-yl)-2-(3,5-dimethoxyphenyl)-4-ethyloxazol-5(4H)-one (**3j**)

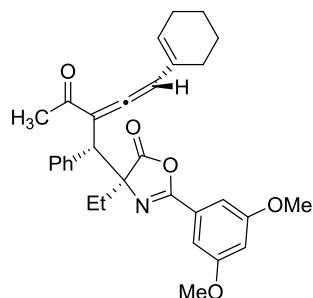

33 mg, 66% yield.  $^1\text{H NMR}$  (400 MHz,  $\text{CDCl}_3$ )  $\delta$  7.33 (dd,  $J = 6.4, 2.9$  Hz, 2H), 7.21 – 7.11 (m, 3H), 7.06 (d,  $J = 2.3$  Hz, 2H), 6.64 (t,  $J = 2.3$  Hz, 1H), 6.52 (s, 1H), 5.86 (s, 1H), 4.66 (s, 1H), 3.83 (s, 6H), 2.22 (s, 3H), 2.16 (d,  $J = 3.0$  Hz, 2H), 1.95 (q,  $J = 7.4$  Hz, 2H), 1.81 – 1.64 (m, 2H), 1.62 – 1.48 (m, 4H), 0.75 (t,  $J = 7.4$  Hz, 3H).  $^{13}\text{C NMR}$  (101 MHz,  $\text{CDCl}_3$ )  $\delta$  215.6, 197.3, 178.8, 161.0, 160.3, 137.7, 130.5, 129.9, 129.9, 128.1, 127.7, 127.7, 111.5, 105.6, 105.5, 104.9, 77.9, 55.7, 47.7, 29.6, 27.1, 26.2, 26.1, 22.4, 22.2, 8.4.  $[\alpha]_{\text{D}}^{25} = -18.80$  (c 1.0,  $\text{CHCl}_3$ ). IR:  $\nu = 3006, 2991, 1977, 1715, 1595$   $\text{cm}^{-1}$ . HRMS-ESI ( $m/z$ ) calculated for  $\text{C}_{31}\text{H}_{34}\text{NO}_5^+$ : 500.2431; found: 500.2431  $[\text{M}+\text{H}]^+$ . HPLC: Chiralpak IA column, 90:10 hexanes/isopropanol, 1 ml/min;  $t_{\text{R}} = 5.1$  min (major), 6.6 min (minor); 92% ee.

(*S*)-4-((*1R,3R*)-2-acetyl-1-phenylocta-2,3-dien-1-yl)-2-(3,5-dimethoxyphenyl)-4-ethyloxazol-5(4H)-one (**3k**)

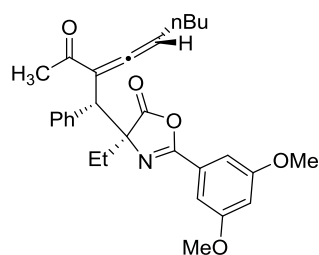

23 mg, 48% yield.  $^1\text{H NMR}$  (400 MHz,  $\text{CDCl}_3$ )  $\delta$  7.33 (dd,  $J = 6.4, 2.9$  Hz, 2H), 7.21 – 7.13 (m, 3H), 7.05 (d,  $J = 2.3$  Hz, 2H), 6.64 (t,  $J = 2.2$  Hz, 1H), 5.84 (t,  $J = 7.2$  Hz, 1H), 4.60 (s, 1H), 3.83 (s, 6H), 2.31 – 2.17 (m, 5H), 1.94 (qd,  $J = 13.8, 7.2$  Hz, 2H), 1.57 – 1.34 (m, 4H), 0.90 (t,  $J = 7.1$  Hz, 3H), 0.75 (t,  $J = 7.4$  Hz, 3H).  $^{13}\text{C NMR}$  (101 MHz,  $\text{CDCl}_3$ )  $\delta$  213.1, 197.5, 178.7, 160.9, 160.0, 137.6, 129.9, 128.0, 127.6, 127.5, 108.7, 105.4, 105.3, 98.5, 77.4, 55.6, 47.3, 31.0, 29.5, 28.2, 26.6, 22.5, 13.8, 8.2.

$[\alpha]_D^{25} = 2.80$  (c 1.0,  $\text{CHCl}_3$ ). IR:  $\nu = 2971, 2013, 1928, 1805, 1679, 1655, 1599 \text{ cm}^{-1}$ . HRMS-ESI (m/z) calculated for  $\text{C}_{29}\text{H}_{34}\text{NO}_5^+$ : 476.2431; found: 476.2426  $[\text{M}+\text{H}]^+$ . HPLC: Chiralpak IA column, 90:10 hexanes/isopropanol, 1 ml/min;  $t_R = 5.0$  min (major), 6.1 min (minor); 92% ee.

(S)-4-((1*R*,3*R*)-2-acetyl-4-phenyl-1-(p-tolyl)buta-2,3-dien-1-yl)-2-(3,5-dimethoxyphenyl)-4-ethyloxazol-5(4H)-one (**3l**)

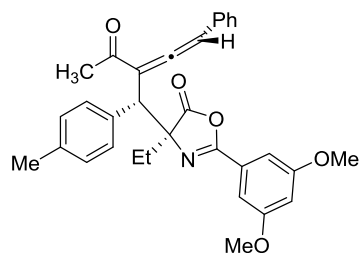

30 mg, 59% yield.  $^1\text{H}$  NMR (400 MHz,  $\text{CDCl}_3$ )  $\delta$  7.40 – 7.24 (m, 5H), 7.21 (d,  $J = 8.0$  Hz, 2H), 6.96 (d,  $J = 2.3$  Hz, 2H), 6.93 (d,  $J = 9.3$  Hz, 3H), 6.59 (t,  $J = 2.3$  Hz, 1H), 4.68 (s, 1H), 3.70 (s, 6H), 2.27 (s, 3H), 2.22 (s, 3H), 2.04 (dt,  $J = 13.6, 6.7$  Hz, 2H), 0.80 (t,  $J = 7.4$  Hz, 3H).  $^{13}\text{C}$  NMR (101 MHz,  $\text{CDCl}_3$ )  $\delta$  216.8, 196.7, 178.7, 160.9, 160.3, 137.4, 134.1, 131.8, 129.8, 129.1, 129.0, 128.3, 127.6, 127.5, 112.3, 105.7, 105.3, 101.3, 77.9, 55.6, 48.2, 29.4, 27.0, 21.1, 8.4.  $[\alpha]_D^{25} = 21.10$  (c 1.0,  $\text{CHCl}_3$ ). IR:  $\nu = 3006, 2989, 2016, 1806, 1680, 1599 \text{ cm}^{-1}$ . HRMS-ESI (m/z) calculated for  $\text{C}_{32}\text{H}_{32}\text{NO}_5^+$ : 510.2275; found: 510.2270  $[\text{M}+\text{H}]^+$ . HPLC: Chiralpak IA column, 90:10 hexanes/isopropanol, 1 ml/min;  $t_R = 5.8$  min (major), 9.2 min (minor); 90% ee.

(S)-4-((1*R*,3*R*)-2-acetyl-1-(4-fluorophenyl)-4-phenylbuta-2,3-dien-1-yl)-2-(3,5-dimethoxyphenyl)-4-ethyloxazol-5(4H)-one (**3m**)

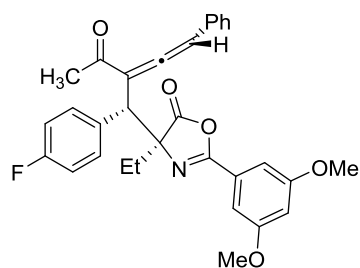

31 mg, 60% yield.  $^1\text{H}$  NMR (400 MHz,  $\text{CDCl}_3$ )  $\delta$  7.39 – 7.27 (m, 5H), 7.25 – 7.19 (m, 2H), 6.95 (d,  $J = 2.3$  Hz, 3H), 6.79 (t,  $J = 8.7$  Hz, 2H), 6.59 (t,  $J = 2.2$  Hz, 1H), 4.71 (s, 1H), 3.71 (s, 6H), 2.28 (s, 3H), 2.03 (td,  $J = 11.5, 6.9$  Hz, 2H), 0.80 (t,  $J = 7.4$  Hz, 3H).  $^{13}\text{C}$  NMR (101 MHz,  $\text{CDCl}_3$ )  $\delta$  216.8, 196.6,

178.7, 162.4 (d,  $J = 246.6$  Hz), 161.0, 160.5, 133.1 (d,  $J = 3.2$  Hz), 131.6, 131.5 (d,  $J = 3.9$  Hz), 129.2, 128.5, 127.4, 127.4, 115.2 (d,  $J = 21.3$  Hz), 112.1, 105.8, 105.3, 101.5, 77.9, 55.6, 47.6, 29.3, 27.0, 8.4.  $^{19}\text{F}$  NMR (376 MHz,  $\text{CDCl}_3$ )  $\delta$  -114.62.  $[\alpha]_{\text{D}}^{25} = -1.10$  (c 1.0,  $\text{CHCl}_3$ ). IR:  $\nu = 2977, 2032, 1932, 1805, 1680, 1654, 1599$   $\text{cm}^{-1}$ . HRMS-ESI ( $m/z$ ) calculated for  $\text{C}_{31}\text{H}_{29}\text{FNO}_5^+$ : 514.2024; found: 514.2019  $[\text{M}+\text{H}]^+$ . HPLC: Chiralpak IA column, 90:10 hexanes/isopropanol, 1 ml/min;  $t_{\text{R}} = 6.0$  min (major), 10.0 min (minor); 92% ee.

(*S*)-4-((*1R,3R*)-2-acetyl-1-(4-chlorophenyl)-4-phenylbuta-2,3-dien-1-yl)-2-(3,5-dimethoxyphenyl)-4-ethylloxazol-5(4H)-one (**3n**)

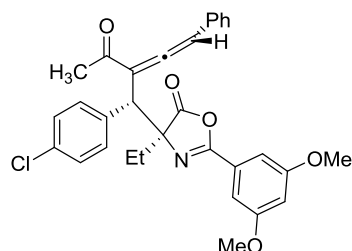

34 mg, 64% yield.  $^1\text{H}$  NMR (400 MHz,  $\text{CDCl}_3$ )  $\delta$  7.32 – 7.21 (m, 3H), 7.21 – 7.13 (m, 4H), 7.01 (d,  $J = 8.5$  Hz, 2H), 6.90 – 6.83 (m, 3H), 6.52 (t,  $J = 2.3$  Hz, 1H), 4.61 (s, 1H), 3.63 (s, 6H), 2.20 (s, 3H), 2.04 – 1.85 (m, 2H), 0.72 (t,  $J = 7.4$  Hz, 3H).  $^{13}\text{C}$  NMR (101 MHz,  $\text{CDCl}_3$ )  $\delta$  216.7, 196.5, 178.6, 161.0, 160.5, 135.9, 133.8, 131.4, 131.3, 129.3, 128.6, 128.5, 127.4, 127.3, 111.9, 105.9, 105.3, 101.6, 77.7, 55.6, 47.7, 29.4, 26.9, 8.4.  $[\alpha]_{\text{D}}^{25} = 23.40$  (c 1.0,  $\text{CHCl}_3$ ). IR:  $\nu = 3006, 2971, 1932, 1825, 1805, 1680, 1653, 1595$   $\text{cm}^{-1}$ . HRMS-ESI ( $m/z$ ) calculated for  $\text{C}_{31}\text{H}_{29}\text{ClNO}_5^+$ : 530.1729; found: 530.1724  $[\text{M}+\text{H}]^+$ . HPLC: Chiralpak IA column, 90:10 hexanes/isopropanol, 1 ml/min;  $t_{\text{R}} = 6.2$  min (major), 10.5 min (minor); 92% ee.

(*S*)-4-((*1R,3R*)-2-acetyl-1-(4-methoxyphenyl)-4-phenylbuta-2,3-dien-1-yl)-2-(3,5-dimethoxyphenyl)-4-ethylloxazol-5(4H)-one (**3o**)

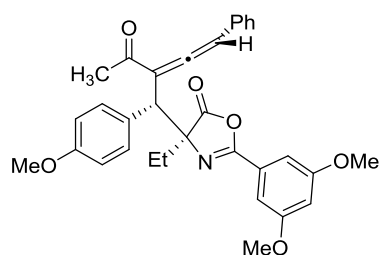

33 mg, 63% yield.  $^1\text{H}$  NMR (400 MHz,  $\text{CDCl}_3$ )  $\delta$  7.40 – 7.18 (m, 7H), 6.95 (d,  $J = 2.3$  Hz, 2H), 6.92 (s, 1H), 6.64 (d,  $J = 8.7$  Hz, 2H), 6.58 (t,  $J = 2.3$  Hz, 1H), 4.67 (s, 1H), 3.70 (s, 6H), 3.69 (s, 3H), 2.27 (s, 3H), 2.10 – 1.98 (m, 2H), 0.80 (t,  $J = 7.4$  Hz, 3H).  $^{13}\text{C}$  NMR (101 MHz,  $\text{CDCl}_3$ )  $\delta$  216.8, 196.7, 178.8, 160.9, 160.3, 159.1, 131.7, 131.0, 129.2, 129.2, 128.3, 127.6, 127.5, 113.6, 112.3, 105.7, 105.3, 101.3, 78.1, 55.6, 55.2, 47.7, 29.3, 27.0, 8.5.  $[\alpha]_{\text{D}}^{25} = 28.10$  (c 1.0,  $\text{CHCl}_3$ ). IR:  $\nu = 3006, 2989, 1929, 1805, 1679, 1599$   $\text{cm}^{-1}$ . HRMS-ESI (m/z) calculated for  $\text{C}_{32}\text{H}_{32}\text{NO}_6^+$ : 526.2224; found: 526.2225  $[\text{M}+\text{H}]^+$ . HPLC: Chiralpak IA column, 90:10 hexanes/isopropanol, 1 ml/min;  $t_{\text{R}} = 7.5$  min (major), 11.6 min (minor); 89% ee.

(*S*)-4-((*1R,3R*)-2-acetyl-1-(naphthalen-2-yl)-4-phenylbuta-2,3-dien-1-yl)-2-(3,5-dimethoxyphenyl)-4-ethylloxazol-5(4H)-one (**3p**)

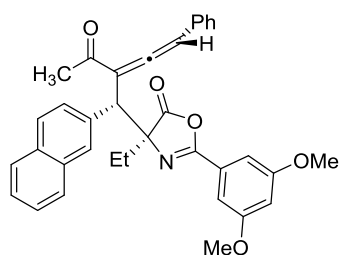

32 mg, 59% yield.  $^1\text{H}$  NMR (400 MHz,  $\text{CDCl}_3$ )  $\delta$  7.81 (s, 1H), 7.70 (d,  $J = 7.4$  Hz, 1H), 7.59 (d,  $J = 8.6$  Hz, 1H), 7.55 (d,  $J = 7.4$  Hz, 1H), 7.47 (dd,  $J = 8.5, 1.5$  Hz, 1H), 7.42 – 7.28 (m, 7H), 7.01 (s, 1H), 6.94 (d,  $J = 2.3$  Hz, 2H), 6.58 (t,  $J = 2.2$  Hz, 1H), 4.91 (s, 1H), 3.68 (s, 6H), 2.29 (s, 3H), 2.11 (qd,  $J = 13.8, 7.2$  Hz, 2H), 0.84 (t,  $J = 7.4$  Hz, 3H).  $^{13}\text{C}$  NMR (101 MHz,  $\text{CDCl}_3$ )  $\delta$  216.9, 196.6, 178.7, 160.9, 160.5, 134.7, 133.1, 132.8, 131.7, 129.5, 129.2, 128.4, 128.1, 127.8, 127.6, 127.5, 127.5, 126.1, 126.0, 112.2, 105.9, 105.2, 101.4, 77.9, 55.6, 48.7, 29.4, 27.0, 8.4.  $[\alpha]_{\text{D}}^{25} = 22.10$  (c 1.0,  $\text{CHCl}_3$ ). IR:  $\nu = 3006, 2989, 1928, 1805, 1679, 1653, 1598$   $\text{cm}^{-1}$ . HRMS-ESI (m/z) calculated for  $\text{C}_{35}\text{H}_{32}\text{NO}_5^+$ : 546.2275; found: 546.2269  $[\text{M}+\text{H}]^+$ . HPLC: Chiralpak IA column, 90:10 hexanes/isopropanol, 1 ml/min;  $t_{\text{R}} = 7.3$  min (major), 12.8 min (minor); 90% ee.

(*S*)-4-((*1R,3R*)-2-acetyl-1-cyclohexyl-4-phenylbuta-2,3-dien-1-yl)-2-(3,5-dimethoxyphenyl)-4-ethylloxazol-5(4H)-one (**3q**)

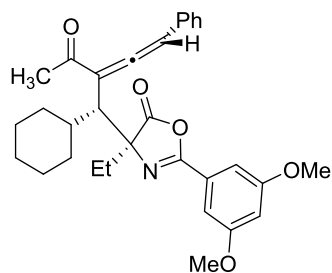

19 mg, 38% yield.  $^1\text{H}$  NMR (400 MHz,  $\text{CDCl}_3$ )  $\delta$  7.34 (dt,  $J = 27.3, 7.7$  Hz, 5H), 7.09 (d,  $J = 2.3$  Hz, 2H), 6.80 (s, 1H), 6.63 (t,  $J = 2.2$  Hz, 1H), 3.81 (s, 6H), 3.42 (d,  $J = 6.4$  Hz, 1H), 2.34 (s, 3H), 1.93 (ddd,  $J = 21.0, 13.7, 6.9$  Hz, 2H), 1.77 – 1.39 (m, 6H), 1.18 – 0.91 (m, 5H), 0.73 (t,  $J = 7.4$  Hz, 3H).  $^{13}\text{C}$  NMR (101 MHz,  $\text{CDCl}_3$ )  $\delta$  216.6, 197.5, 180.0, 161.0, 159.6, 132.3, 129.2, 128.2, 127.8, 127.5, 111.6, 105.6, 105.5, 100.4, 55.7, 40.7, 32.6, 31.0, 29.6, 26.8, 26.6, 26.3, 26.3, 7.9.  $[\alpha]_{\text{D}}^{25} = 84.60$  (c 1.0,  $\text{CHCl}_3$ ). IR:  $\nu = 3006, 2931, 2854, 2022, 1928, 1819, 1676, 1596\text{cm}^{-1}$ . HRMS-ESI ( $m/z$ ) calculated for  $\text{C}_{31}\text{H}_{36}\text{NO}_5^+$ : 502.2588; found: 502.2582  $[\text{M}+\text{H}]^+$ . HPLC: Chiralpak IA column, 90:10 hexanes/isopropanol, 1 ml/min;  $t_{\text{R}} = 5.1$  min (major), 7.2 min (minor); 93% ee.

(*S*)-2-(3,5-dimethoxyphenyl)-4-ethyl-4-((*R*)-3-oxo-1-phenyl-2-((*R*)-2-phenylvinylidene)pentyl)oxazol-5(4H)-one (**3r**)

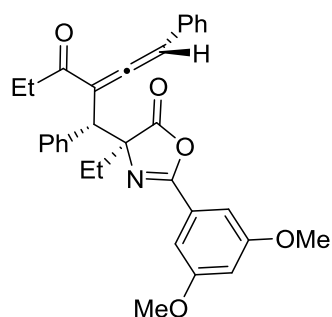

32 mg, 63% yield.  $^1\text{H}$  NMR (400 MHz,  $\text{CDCl}_3$ )  $\delta$  7.40 – 7.21 (m, 7H), 7.20 – 7.06 (m, 3H), 6.94 (t,  $J = 4.8$  Hz, 2H), 6.91 (s, 1H), 6.58 (t,  $J = 2.2$  Hz, 1H), 4.73 (s, 1H), 3.71 (d,  $J = 14.0$  Hz, 6H), 2.78 (dq,  $J = 16.9, 7.3$  Hz, 1H), 2.62 – 2.45 (m, 1H), 2.15 – 1.91 (m, 2H), 0.99 (t,  $J = 7.3$  Hz, 3H), 0.80 (t,  $J = 7.4$  Hz, 3H).  $^{13}\text{C}$  NMR (101 MHz,  $\text{CDCl}_3$ )  $\delta$  216.0, 199.7, 178.7, 160.9, 160.3, 137.3, 131.8, 130.0, 129.1, 128.3, 128.3, 127.8, 127.5, 127.5, 111.3, 105.8, 105.3, 101.5, 77.9, 55.6, 48.7, 32.6, 29.4, 8.7, 8.5.  $[\alpha]_{\text{D}}^{25} = 41.70$  (c 1.0,  $\text{CHCl}_3$ ). IR:  $\nu = 3006, 2989, 1931, 1802, 1683, 1654, 1598\text{cm}^{-1}$ . HRMS-ESI ( $m/z$ ) calculated for  $\text{C}_{32}\text{H}_{32}\text{NO}_5^+$ : 510.2275; found: 510.2264  $[\text{M}+\text{H}]^+$ . HPLC: Chiralpak IA column, 90:10 hexanes/isopropanol, 1 ml/min;  $t_{\text{R}} = 5.3$  min (major), 9.6 min (minor); 98% ee.



(*S*)-2-(3,5-dimethoxyphenyl)-4-ethyl-4-((*R*)-3-oxo-1-phenyl-2-((*R*)-2-phenylvinylidene)hexyl)oxazol-5(4H)-one (**3s**)

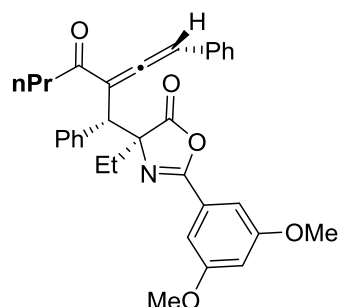

33 mg, 63% yield.  $^1\text{H NMR}$  (400 MHz,  $\text{CDCl}_3$ )  $\delta$  7.38 – 7.20 (m, 7H), 7.18 – 7.06 (m, 3H), 6.95 (d,  $J = 2.2$  Hz, 2H), 6.92 (s, 1H), 6.58 (t,  $J = 2.1$  Hz, 1H), 4.73 (s, 1H), 3.70 (s, 6H), 2.79 – 2.63 (m, 1H), 2.56 – 2.42 (m, 1H), 2.04 (dt,  $J = 13.7, 6.7$  Hz, 2H), 1.55 (td,  $J = 13.8, 6.8$  Hz, 2H), 0.79 (m, 6H).  $^{13}\text{C NMR}$  (101 MHz,  $\text{CDCl}_3$ )  $\delta$  216.1, 199.2, 178.7, 160.9, 160.3, 137.3, 131.8, 130.0, 129.1, 128.3, 128.3, 127.8, 127.5, 127.5, 111.7, 105.8, 105.3, 101.5, 77.8, 55.6, 48.6, 41.1, 29.4, 18.3, 13.8, 8.4.  $[\alpha]_{\text{D}}^{25} = 75.50$  (c 1.0,  $\text{CHCl}_3$ ). IR:  $\nu = 3006, 2989, 1931, 1802, 1683, 1654, 1598$   $\text{cm}^{-1}$ . HRMS-ESI ( $m/z$ ) calculated for  $\text{C}_{33}\text{H}_{34}\text{NO}_5^+$ : 524.2431; found: 524.2422  $[\text{M}+\text{H}]^+$ . HPLC: Chiralpak IA column, 90:10 hexanes/isopropanol, 1 ml/min;  $t_{\text{R}} = 5.1$  min (major), 7.7 min (minor); 98% ee.

(*S*)-2-(3,5-dimethoxyphenyl)-4-ethyl-4-((*R*)-3-oxo-1-phenyl-2-((*R*)-2-phenylvinylidene)heptyl)oxazol-5(4H)-one (**3t**)

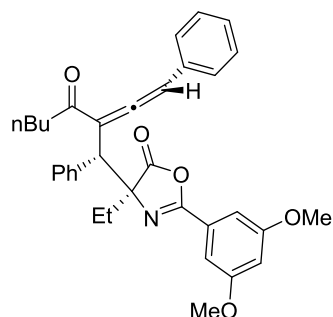

33 mg, 61% yield.  $^1\text{H NMR}$  (400 MHz,  $\text{CDCl}_3$ )  $\delta$  7.39 – 7.27 (m, 5H), 7.26 – 7.20 (m, 2H), 7.13 (m, 3H), 6.96 (d,  $J = 2.3$  Hz, 2H), 6.91 (s, 1H), 6.59 (t,  $J = 2.2$  Hz, 1H), 4.73 (s, 1H), 3.71 (s, 6H), 2.72 (ddd,  $J = 15.4, 8.3, 6.7$  Hz, 1H), 2.58 – 2.44 (m, 1H), 2.13 – 1.95 (m, 2H), 1.48 (dd,  $J = 15.2, 7.0$  Hz, 2H), 1.17 (dd,  $J = 14.5, 7.2$  Hz, 2H), 0.78 (dt,  $J = 14.8, 7.4$  Hz, 6H).  $^{13}\text{C NMR}$  (101 MHz,  $\text{CDCl}_3$ )  $\delta$  216.1, 199.3, 178.7, 160.9, 160.3, 137.3, 131.8, 130.0, 129.1, 128.3, 128.3, 127.8, 127.5, 127.5, 111.7, 105.8, 105.3, 101.5, 77.8, 55.6, 48.6, 39.0, 29.4, 27.1, 22.4, 13.9, 8.4.  $[\alpha]_{\text{D}}^{25} = 23.2$  (c 1.0,  $\text{CHCl}_3$ ). IR:

$\nu = 3006, 2989, 1802, 1654, 1599 \text{ cm}^{-1}$ . HRMS-ESI ( $m/z$ ) calculated for  $\text{C}_{34}\text{H}_{36}\text{NO}_5^+$ : 538.2588; found: 538.2585  $[\text{M}+\text{H}]^+$ . HPLC: Chiralpak IA column, 90:10 hexanes/isopropanol, 1 ml/min;  $t_{\text{R}} = 5.0 \text{ min}$  (major), 7.0 min (minor); 99% ee.

(*S*)-2-(3,5-dimethoxyphenyl)-4-ethyl-4-((*R*)-5-methyl-3-oxo-1-phenyl-2-((*R*)-2-phenylvinylidene)hexyl)oxazol-5(4H)-one (**3u**)

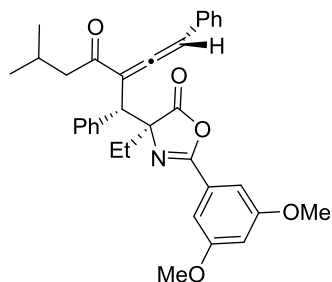

34 mg, 63% yield.  $^1\text{H NMR}$  (500 MHz,  $\text{CDCl}_3$ )  $\delta$  7.38 – 7.20 (m, 7H), 7.13 (p,  $J = 6.6 \text{ Hz}$ , 3H), 6.95 (s, 2H), 6.90 (s, 1H), 6.58 (s, 1H), 4.73 (s, 1H), 3.70 (s, 6H), 2.56 (dd,  $J = 15.0, 7.2 \text{ Hz}$ , 1H), 2.39 (dd,  $J = 15.0, 6.6 \text{ Hz}$ , 1H), 2.12 – 1.95 (m, 3H), 0.80 (t,  $J = 6.2 \text{ Hz}$ , 6H), 0.75 (d,  $J = 6.6 \text{ Hz}$ , 3H).  $^{13}\text{C NMR}$  (126 MHz,  $\text{CDCl}_3$ )  $\delta$  216.3, 198.9, 178.7, 160.9, 160.4, 137.4, 131.8, 130.0, 129.1, 128.3, 128.3, 127.8, 127.6, 127.5, 112.3, 105.8, 105.3, 101.6, 77.8, 55.6, 48.6, 47.9, 29.4, 25.9, 22.8, 22.6, 8.4.  $[\alpha]_{\text{D}}^{25} = 10.70$  (c 1.0,  $\text{CHCl}_3$ ). IR:  $\nu = 2961, 2035, 1932, 1805, 1673, 1598 \text{ cm}^{-1}$ . HRMS-ESI ( $m/z$ ) calculated for  $\text{C}_{34}\text{H}_{36}\text{NO}_5^+$ : 538.2588; found: 538.2582  $[\text{M}+\text{H}]^+$ . HPLC: Chiralpak IA column, 90:10 hexanes/isopropanol, 1 ml/min;  $t_{\text{R}} = 5.0 \text{ min}$  (major), 7.0 min (minor); 98% ee.

(*S*)-4-((*IR,3R*)-2-acetyl-1,4-diphenylbuta-2,3-dien-1-yl)-4-butyl-2-(3,5-dimethoxyphenyl)oxazol-5(4H)-one (**3v**)

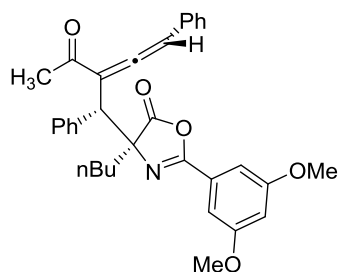

35 mg, 67% yield.  $^1\text{H NMR}$  (400 MHz,  $\text{CDCl}_3$ )  $\delta$  7.38 – 7.21 (m, 9H), 7.18 – 7.06 (m, 3H), 6.94 (d,  $J = 2.1 \text{ Hz}$ , 3H), 6.58 (t,  $J = 2.2 \text{ Hz}$ , 1H), 4.71 (s, 1H), 3.69 (s, 6H), 2.28 (s, 3H), 2.03 – 1.92 (m, 2H), 1.29 (dq,  $J = 14.1, 6.9 \text{ Hz}$ , 2H), 1.23 – 1.11 (m, 1H), 1.11 – 0.98 (m, 1H), 0.84 (t,  $J = 7.3 \text{ Hz}$ , 3H).  $^{13}\text{C NMR}$

(101 MHz, CDCl<sub>3</sub>)  $\delta$  217.0, 196.6, 178.9, 160.9, 160.2, 137.2, 131.7, 130.0, 129.1, 128.4, 128.3, 127.8, 127.6, 127.5, 112.1, 105.8, 105.3, 101.3, 77.4, 55.6, 48.8, 35.9, 27.0, 26.2, 22.7, 14.0.  $[\alpha]_D^{25} = 6.5$  (c 1.0, CHCl<sub>3</sub>). IR:  $\nu = 3006, 2991, 2032, 1717, 1653, 1559$  cm<sup>-1</sup>. HRMS-ESI (m/z) calculated for C<sub>33</sub>H<sub>34</sub>NO<sub>5</sub><sup>+</sup>: 524.2431; found: 524.2426 [M+H]<sup>+</sup>. HPLC: Chiralpak IA column, 90:10 hexanes/isopropanol, 1 ml/min;  $t_R = 5.4$  min (major), 10.7 min (minor); 95% ee.

(S)-4-((1*R*,3*R*)-2-acetyl-1,4-diphenylbuta-2,3-dien-1-yl)-4-benzyl-2-(3,5-dimethoxyphenyl)oxazol-5(4H)-one (**3w**)

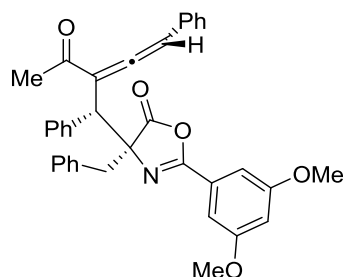

27 mg, 48% yield. <sup>1</sup>H NMR (400 MHz, CDCl<sub>3</sub>)  $\delta$  7.46 – 7.23 (m, 9H), 7.21 – 7.11 (m, 6H), 6.98 (s, 1H), 6.76 (d,  $J = 2.2$  Hz, 2H), 6.53 (t,  $J = 2.2$  Hz, 1H), 4.86 (s, 1H), 3.66 (s, 6H), 3.43 – 3.36 (m, 1H), 3.20 (d,  $J = 13.3$  Hz, 1H), 2.30 (s, 3H). <sup>13</sup>C NMR (101 MHz, CDCl<sub>3</sub>)  $\delta$  216.9, 196.7, 177.9, 160.7, 160.1, 137.2, 134.3, 131.7, 130.4, 130.1, 129.2, 128.4, 128.3, 128.2, 127.9, 127.5, 127.5, 127.3, 112.2, 105.4, 105.3, 101.5, 78.3, 55.5, 48.7, 42.4, 27.1.  $[\alpha]_D^{25} = -41.50$  (c 1.0, CHCl<sub>3</sub>). IR:  $\nu = 2989, 1812, 1680, 1598$  cm<sup>-1</sup>. HRMS-ESI (m/z) calculated for C<sub>36</sub>H<sub>32</sub>NO<sub>5</sub><sup>+</sup>: 558.2275; found: 558.2269 [M+H]<sup>+</sup>. HPLC: Chiralpak IC column, 90:10 hexanes/isopropanol, 1 ml/min;  $t_R = 14.7$  min (minor), 23.2 min (major); 95% ee.

(S)-4-((1*R*,3*R*)-2-acetyl-1,4-diphenylbuta-2,3-dien-1-yl)-2-(3,5-dimethoxyphenyl)-4-(2-(methylthio)ethyl)oxazol-5(4H)-one (**3x**)

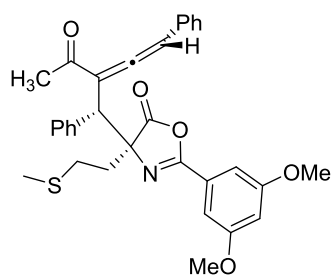

32 mg, 59% yield. <sup>1</sup>H NMR (400 MHz, CDCl<sub>3</sub>)  $\delta$  7.39 – 7.22 (m, 7H), 7.18 – 7.05 (m, 3H), 6.95 (s,

1H), 6.91 (d,  $J = 2.3$  Hz, 2H), 6.58 (t,  $J = 2.2$  Hz, 1H), 4.70 (s, 1H), 3.68 (s, 6H), 2.47 – 2.29 (m, 4H), 2.28 (s, 3H), 2.04 (s, 3H).  $^{13}\text{C}$  NMR (101 MHz,  $\text{CDCl}_3$ )  $\delta$  217.0, 196.6, 178.5, 160.9, 160.8, 136.6, 131.6, 129.9, 129.2, 128.4, 128.3, 128.0, 127.5, 127.4, 111.9, 105.9, 105.3, 101.4, 76.5, 55.6, 48.8, 35.3, 28.8, 27.0, 15.4.  $[\alpha]_{\text{D}}^{25} = 6.50$  (c 1.0,  $\text{CHCl}_3$ ). IR:  $\nu = 3006, 2991, 2032, 1815, 1677, 1652, 1599 \text{ cm}^{-1}$ . HRMS-ESI ( $m/z$ ) calculated for  $\text{C}_{32}\text{H}_{32}\text{NO}_5\text{S}^+$ : 542.1996; found: 542.1990  $[\text{M}+\text{H}]^+$ . HPLC: Chiralpak IA column, 90:10 hexanes/isopropanol, 1 ml/min;  $t_{\text{R}} = 7.5$  min (major), 19.1 min (minor); 91% ee.

tert-butyl(4-((*S*)-4-((*IR,3R*)-2-acetyl-1,4-diphenylbuta-2,3-dien-1-yl)-2-(3,5-dimethoxyphenyl)-5-oxo-4,5-dihydrooxazol-4-yl)butyl)carbamate (**3y**)

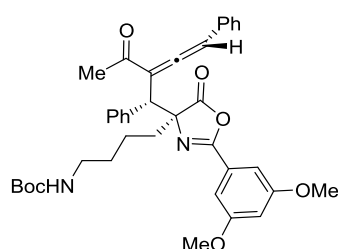

43 mg, 67% yield.  $^1\text{H}$  NMR (400 MHz,  $\text{CDCl}_3$ )  $\delta$  7.29 (m, 7H), 7.12 (dd,  $J = 10.2, 7.2$  Hz, 3H), 6.96 (s, 1H), 6.92 (d,  $J = 1.9$  Hz, 2H), 6.58 (t,  $J = 2.1$  Hz, 1H), 4.69 (s, 1H), 4.49 (s, 1H), 3.69 (s, 6H), 3.03 (d,  $J = 5.8$  Hz, 2H), 2.28 (s, 3H), 2.01 (td,  $J = 11.2, 4.7$  Hz, 2H), 1.55 – 1.34 (m, 11H), 1.27 – 1.04 (m, 2H).  $^{13}\text{C}$  NMR (101 MHz,  $\text{CDCl}_3$ )  $\delta$  217.0, 196.7, 178.7, 160.9, 160.4, 156.0, 137.0, 131.7, 129.9, 129.1, 128.4, 128.3, 127.9, 127.5, 127.4, 112.0, 105.9, 105.3, 101.4, 79.2, 77.3, 55.6, 48.7, 40.3, 35.7, 30.0, 28.5, 27.0, 21.5.  $[\alpha]_{\text{D}}^{25} = 47.60$  (c 1.0,  $\text{CHCl}_3$ ). IR:  $\nu = 3006, 2989, 2032, 1805, 1711, 1654, 1598 \text{ cm}^{-1}$ . HRMS-ESI ( $m/z$ ) calculated for  $\text{C}_{38}\text{H}_{43}\text{N}_2\text{O}_7^+$ : 639.3065; found: 639.3065  $[\text{M}+\text{H}]^+$ . HPLC: Chiralpak IA column, 90:10 hexanes/isopropanol, 1 ml/min;  $t_{\text{R}} = 8.9$  min (major), 20.3 min (minor); 89% ee.

(*S*)-4-((*IR,3S*)-2-acetyl-1,4-diphenylbuta-2,3-dien-1-yl)-2-(3,5-dimethoxyphenyl)-4-ethyloxazol-5(4H)-one (**4a**)

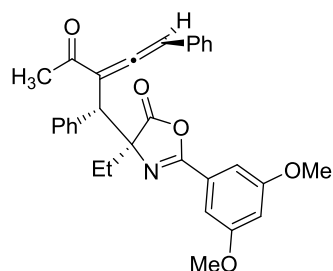

34 mg, 69% yield.  $^1\text{H}$  NMR (400 MHz,  $\text{CDCl}_3$ )  $\delta$  7.54 (d,  $J = 7.4$  Hz, 2H), 7.36 (dd,  $J = 10.1, 5.4$  Hz,

4H), 7.29 (d,  $J = 7.3$  Hz, 1H), 7.21 – 7.14 (m, 3H), 6.81 (s, 1H), 6.78 (d,  $J = 2.2$  Hz, 2H), 6.52 (t,  $J = 2.0$  Hz, 1H), 4.77 (s, 1H), 3.52 (s, 6H), 2.30 (s, 3H), 2.18 – 2.01 (m, 2H), 0.82 (t,  $J = 7.4$  Hz, 3H).  $^{13}\text{C}$  NMR (101 MHz,  $\text{CDCl}_3$ )  $\delta$  217.6, 196.7, 178.7, 160.8, 160.4, 137.9, 131.9, 129.7, 129.0, 128.3, 128.3, 128.2, 127.9, 127.4, 111.9, 106.0, 105.1, 100.8, 77.8, 55.4, 47.4, 29.9, 26.9, 8.4.  $[\alpha]_{\text{D}}^{25} = -375.5$  (c 1.0,  $\text{CHCl}_3$ ). IR:  $\nu = 3006, 2989, 2032, 1743, 1664, 1595$   $\text{cm}^{-1}$ . HRMS-ESI ( $m/z$ ) calculated for  $\text{C}_{31}\text{H}_{30}\text{NO}_5^+$ : 496.2118; found: 496.2109  $[\text{M}+\text{H}]^+$ . HPLC: Chiralpak IA column, 90:10 hexanes/isopropanol, 1 ml/min;  $t_{\text{R}} = 5.9$  min (minor), 7.3min (major); 97% ee.

(*S*)-4-((*IR,3S*)-2-acetyl-1-phenyl-4-(*p*-tolyl)buta-2,3-dien-1-yl)-2-(3,5-dimethoxyphenyl)-4-ethyloxazol-5(4H)-one (**4b**)

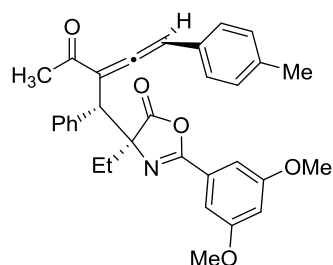

30 mg, 59% yield.  $^1\text{H}$  NMR (400 MHz,  $\text{CDCl}_3$ )  $\delta$  7.39 (d,  $J = 7.8$  Hz, 4H), 7.22 – 7.16 (m, 3H), 7.13 (d,  $J = 7.9$  Hz, 2H), 6.84 – 6.73 (m, 3H), 6.54 (d,  $J = 2.3$  Hz, 1H), 4.77 (s, 1H), 3.55 (s, 6H), 2.34 (s, 3H), 2.29 (s, 3H), 2.07 (t,  $J = 7.5$  Hz, 2H), 0.80 (t,  $J = 7.4$  Hz, 3H).  $^{13}\text{C}$  NMR (101 MHz,  $\text{CDCl}_3$ )  $\delta$  217.1, 196.8, 178.8, 160.8, 160.3, 138.3, 137.9, 129.8, 129.7, 128.7, 128.3, 128.1, 127.8, 127.5, 111.9, 105.9, 105.2, 100.9, 77.6, 55.4, 47.7, 30.1, 26.9, 21.3, 8.4.  $[\alpha]_{\text{D}}^{25} = -327.70$  (c 1.0,  $\text{CHCl}_3$ ). IR:  $\nu = 3006, 2987, 2035, 1928, 1825, 1802, 1679, 1653, 1598$   $\text{cm}^{-1}$ . HRMS-ESI ( $m/z$ ) calculated for  $\text{C}_{32}\text{H}_{32}\text{NO}_5^+$ : 510.2275; found: 510.2269  $[\text{M}+\text{H}]^+$ . HPLC: Chiralpak IA column, 90:10 hexanes/isopropanol, 1 ml/min;  $t_{\text{R}} = 5.5$  min (minor), 6.7 min (major); 96% ee.

(*S*)-4-((*IR,3S*)-2-acetyl-4-(4-chlorophenyl)-1-phenylbuta-2,3-dien-1-yl)-2-(3,5-dimethoxyphenyl)-4-ethyloxazol-5(4H)-one (**4c**)

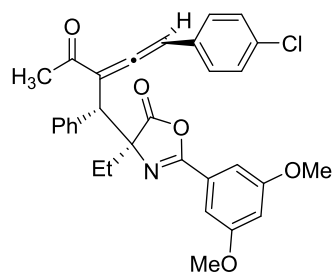

34 mg, 64% yield.  $^1\text{H}$  NMR (400 MHz,  $\text{CDCl}_3$ )  $\delta$  7.44 (d,  $J = 8.4$  Hz, 2H), 7.36 (dd,  $J = 6.5, 2.9$  Hz, 2H), 7.29 (d,  $J = 8.4$  Hz, 2H), 7.19 (dd,  $J = 5.0, 1.6$  Hz, 3H), 6.77 (s, 1H), 6.75 (d,  $J = 2.3$  Hz, 2H), 6.56 (t,  $J = 2.3$  Hz, 1H), 4.75 (s, 1H), 3.61 (s, 6H), 2.29 (s, 3H), 2.11 – 1.95 (m, 2H), 0.80 (t,  $J = 7.4$  Hz, 3H).  $^{13}\text{C}$  NMR (101 MHz,  $\text{CDCl}_3$ )  $\delta$  217.0, 196.3, 178.5, 160.9, 160.5, 137.7, 134.2, 130.3, 129.7, 129.3, 129.2, 128.4, 127.9, 127.3, 112.2, 105.7, 105.3, 100.2, 77.4, 55.5, 47.7, 30.2, 27.0, 8.3.  $[\alpha]_{\text{D}}^{25} = -432.60$  (c 1.0,  $\text{CHCl}_3$ ). IR:  $\nu = 3006, 2989, 2032, 1805, 1683, 1653, 1599$   $\text{cm}^{-1}$ . HRMS-ESI ( $m/z$ ) calculated for  $\text{C}_{31}\text{H}_{29}\text{NO}_5\text{Cl}^+$ : 530.1729; found: 530.1722  $[\text{M}+\text{H}]^+$ . HPLC: Chiralpak IA column, 90:10 hexanes/isopropanol, 1 ml/min;  $t_{\text{R}} = 6.4$  min (minor), 7.4 min (major); 98% ee.

(*S*)-4-((*1R,3S*)-2-acetyl-4-(4-methoxyphenyl)-1-phenylbuta-2,3-dien-1-yl)-2-(3,5-dimethoxyphenyl)-4-ethylloxazol-5(4H)-one (**4d**)

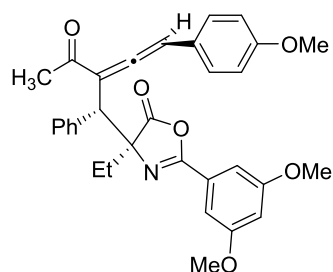

25 mg, 48% yield.  $^1\text{H}$  NMR (500 MHz,  $\text{CDCl}_3$ )  $\delta$  8.27 (d,  $J = 8.8$  Hz, 2H), 7.38 (t,  $J = 7.2$  Hz, 2H), 7.34 (d,  $J = 7.0$  Hz, 1H), 7.28 (d,  $J = 7.1$  Hz, 2H), 7.00 (d,  $J = 2.1$  Hz, 2H), 6.97 (d,  $J = 8.8$  Hz, 2H), 6.63 (t,  $J = 2.1$  Hz, 1H), 6.38 (s, 1H), 5.14 (s, 1H), 3.86 (s, 3H), 3.84 (s, 6H), 2.18 (d,  $J = 1.1$  Hz, 3H), 1.47 (dd,  $J = 14.8, 7.5$  Hz, 1H), 1.14 (dq,  $J = 14.7, 7.4$  Hz, 1H), 0.80 (t,  $J = 7.4$  Hz, 3H).  $^{13}\text{C}$  NMR (126 MHz,  $\text{CDCl}_3$ )  $\delta$  193.4, 166.9, 161.1, 160.7, 151.1, 143.6, 136.7, 136.2, 129.4, 128.6, 127.7, 127.5, 127.6, 122.7, 121.5, 114.3, 105.3, 104.0, 74.1, 55.8, 55.5, 47.5, 27.8, 13.2, 7.6.  $[\alpha]_{\text{D}}^{25} = 78.8$  (c 1.0,  $\text{CHCl}_3$ ). IR:  $\nu = 3006, 2989, 2841, 2022, 1712, 1664, 1592$   $\text{cm}^{-1}$ . HRMS-ESI ( $m/z$ ) calculated for  $\text{C}_{32}\text{H}_{32}\text{NO}_6^+$ : 526.2224; found: 526.2215  $[\text{M}+\text{H}]^+$ . HPLC: Chiralpak IA column, 90:10 hexanes/isopropanol, 1 ml/min;  $t_{\text{R}} = 6.8$  min (minor), 8.4 min (major); 96% ee.

(*S*)-4-((*1R,3S*)-2-acetyl-4-(4-fluorophenyl)-1-phenylbuta-2,3-dien-1-yl)-2-(3,5-dimethoxyphenyl)-4-ethyloxazol-5(4H)-one (**4e**)

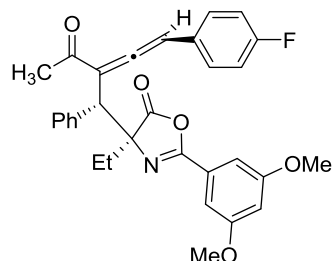

32 mg, 62% yield.  $^1\text{H}$  NMR (500 MHz,  $\text{CDCl}_3$ )  $\delta$  7.32 (m, 5H), 7.18 (m, 3H), 7.01 – 6.93 (m, 1H), 6.83 – 6.73 (m, 3H), 6.54 (s, 1H), 4.76 (s, 1H), 3.58 (s, 6H), 2.30 (s, 3H), 2.17 – 1.97 (m, 2H), 0.82 (t,  $J = 7.4$  Hz, 3H).  $^{13}\text{C}$  NMR (126 MHz,  $\text{CDCl}_3$ )  $\delta$  217.6, 196.3, 178.6, 163.2 (d,  $J = 246.4$  Hz), 160.9, 160.5, 137.7, 134.3 (d,  $J = 7.9$  Hz), 130.5 (d,  $J = 8.3$  Hz), 129.6, 128.4, 127.9, 127.4, 123.9 (d,  $J = 2.8$  Hz), 115.2 (d,  $J = 21.4$  Hz), 114.8 (d,  $J = 22.7$  Hz), 112.1, 106.0, 105.2, 100.2 (d,  $J = 2.7$  Hz), 77.7, 55.4, 47.5, 30.1, 26.9, 8.3.  $^{19}\text{F}$  NMR (471 MHz,  $\text{CDCl}_3$ )  $\delta$  -112.26.  $[\alpha]_{\text{D}}^{25} = -309.20$  (c 1.0,  $\text{CHCl}_3$ ). IR:  $\nu = 3059, 2980, 1932, 1805, 1683, 1653, 1599$   $\text{cm}^{-1}$ . HRMS-ESI ( $m/z$ ) calculated for  $\text{C}_{31}\text{H}_{29}\text{FNO}_5$  $^+$ : 514.2024; found: 514.2014  $[\text{M}+\text{H}]^+$ . HPLC: Chiralpak IA column, 90:10 hexanes/isopropanol, 1 ml/min;  $t_{\text{R}} = 6.1$  min (minor), 7.8 min (major); 97% ee.

(*S*)-4-((*1R,3S*)-2-acetyl-1-phenyl-4-(4-(trifluoromethyl)phenyl)buta-2,3-dien-1-yl)-2-(3,5-dimethoxyphenyl)-4-ethyloxazol-5(4H)-one (**4f**)

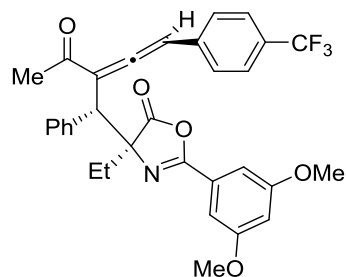

35 mg, 62% yield.  $^1\text{H}$  NMR (400 MHz,  $\text{CDCl}_3$ )  $\delta$  7.65 (dd,  $J = 21.2, 8.3$  Hz, 4H), 7.39 – 7.31 (m, 2H), 7.22 – 7.14 (m, 3H), 6.84 (s, 1H), 6.73 (d,  $J = 2.2$  Hz, 2H), 6.53 (t,  $J = 2.2$  Hz, 1H), 4.77 (s, 1H), 3.55 (s, 6H), 2.31 (s, 3H), 2.17 – 1.95 (m, 2H), 0.82 (t,  $J = 7.4$  Hz, 3H).  $^{13}\text{C}$  NMR (101 MHz,  $\text{CDCl}_3$ )  $\delta$  217.9, 196.1, 178.4, 160.9, 160.7, 137.6, 135.8, 130.1 (q,  $J = 32.6$  Hz), 129.6, 128.4, 128.3, 128.0, 127.2, 126.0 (q,  $J = 3.7$  Hz), 124.1 (q,  $J = 272.1$  Hz), 112.3, 105.7, 105.3, 100.1, 77.6, 55.3, 47.5, 30.2,

27.0, 8.4.  $^{19}\text{F}$  NMR (376 MHz,  $\text{CDCl}_3$ )  $\delta$  -62.65.  $[\alpha]_{\text{D}}^{25} = -269.10$  (c 1.0,  $\text{CHCl}_3$ ). IR:  $\nu = 3006, 2990, 2032, 1928, 1804, 1683, 1650, 1599 \text{ cm}^{-1}$ . HRMS-ESI (m/z) calculated for  $\text{C}_{32}\text{H}_{29}\text{F}_3\text{NO}_5^+$ : 564.1992; found: 564.1993  $[\text{M}+\text{H}]^+$ . HPLC: Chiralpak IA column, 90:10 hexanes/isopropanol, 1 ml/min;  $t_{\text{R}} = 5.9$  min (minor), 6.7 min (major); 98% ee.

Methyl 3-((*S*)-3-((*R*)-((*S*)-2-(3,5-dimethoxyphenyl)-4-ethyl-5-oxo-4,5-dihydrooxazol-4-yl)(phenyl)methyl)-4-oxopenta-1,2-dien-1-yl)benzoate (**4g**)

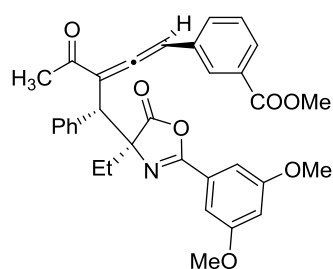

40 mg, 72% yield.  $^1\text{H}$  NMR (400 MHz,  $\text{CDCl}_3$ )  $\delta$  8.22 (s, 1H), 7.94 (d,  $J = 7.8$  Hz, 1H), 7.70 (d,  $J = 7.7$  Hz, 1H), 7.43 (t,  $J = 7.7$  Hz, 1H), 7.37 (dd,  $J = 6.4, 2.8$  Hz, 2H), 7.24 – 7.13 (m, 3H), 6.87 (s, 1H), 6.70 (d,  $J = 2.3$  Hz, 2H), 6.49 (t,  $J = 2.2$  Hz, 1H), 4.77 (s, 1H), 3.90 (s, 3H), 3.53 (s, 6H), 2.30 (s, 3H), 2.08 (dt,  $J = 15.4, 7.7$  Hz, 2H), 0.82 (t,  $J = 7.4$  Hz, 3H).  $^{13}\text{C}$  NMR (126 MHz,  $\text{CDCl}_3$ )  $\delta$  217.3, 196.3, 178.6, 166.6, 160.8, 160.4, 137.7, 132.4, 132.3, 131.1, 129.7, 129.4, 129.1, 129.1, 128.4, 127.9, 127.3, 112.2, 105.7, 105.2, 100.3, 77.6, 55.4, 52.4, 47.6, 30.2, 27.0, 8.3.  $[\alpha]_{\text{D}}^{25} = -314.40$  (c 1.0,  $\text{CHCl}_3$ ). IR:  $\nu = 3006, 2989, 1931, 1805, 1721, 1680, 1653, 1599 \text{ cm}^{-1}$ . HRMS-ESI (m/z) calculated for  $\text{C}_{33}\text{H}_{32}\text{NO}_7^+$ : 554.2173; found: 554.2169  $[\text{M}+\text{H}]^+$ . HRMS: m/z (ESI) calculated for  $(\text{C}_{33}\text{H}_{31}\text{NO}_7)$   $[\text{M}+\text{H}]^+$ : 554.2173, found: 554.2169. HPLC: Chiralpak IA column, 90:10 hexanes/isopropanol, 1 ml/min;  $t_{\text{R}} = 8.2$  min (minor), 11.0 min (major); 97% ee.

(*S*)-4-((*1R,3S*)-2-acetyl-4-(2-chlorophenyl)-1-phenylbuta-2,3-dien-1-yl)-2-(3,5-dimethoxyphenyl)-4-ethylloxazol-5(4H)-one (**4h**)

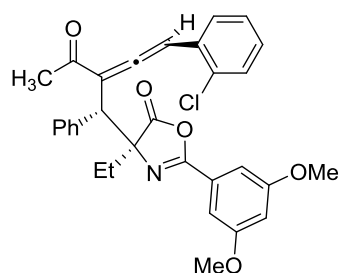



28 mg, 53% yield.  $^1\text{H}$  NMR (400 MHz,  $\text{CDCl}_3$ )  $\delta$  7.83 (dd,  $J = 7.4, 1.9$  Hz, 1H), 7.42 (dd,  $J = 7.7, 1.8$  Hz, 1H), 7.36 (dd,  $J = 6.5, 2.9$  Hz, 2H), 7.31 (s, 1H), 7.25 – 7.17 (m, 4H), 7.11 (m, 1H), 6.79 (d,  $J = 2.3$  Hz, 2H), 6.54 (t,  $J = 2.3$  Hz, 1H), 4.76 (s, 1H), 3.59 (s, 6H), 2.32 (s, 3H), 2.06 (m, 2H), 0.81 (t,  $J = 7.4$  Hz, 3H).  $^{13}\text{C}$  NMR (101 MHz,  $\text{CDCl}_3$ )  $\delta$  218.1, 196.3, 178.6, 160.9, 160.5, 137.6, 132.8, 130.0, 130.0, 129.8, 129.7, 129.3, 128.4, 128.0, 127.4, 127.3, 112.0, 106.0, 105.2, 97.2, 55.5, 47.6, 30.0, 27.0, 8.4.  $[\alpha]_{\text{D}}^{25} = -172.80$  (c 1.0,  $\text{CHCl}_3$ ). IR:  $\nu = 3006, 2989, 2025, 1805, 1680, 1599$   $\text{cm}^{-1}$ . HRMS:  $m/z$  (ESI) calculated for  $\text{C}_{31}\text{H}_{29}\text{ClNO}_5^+$ : 530.1729, found: 530.1722  $[\text{M}+\text{H}]^+$ . HPLC: Chiralpak IC column, 95:05 hexanes/isopropanol, 1 ml/min;  $t_{\text{R}} = 16.0$  min (minor), 28.8 min (major); 96% ee.

(*S*)-4-((*1R,3R*)-2-acetyl-1-phenyl-4-(thiophen-3-yl)buta-2,3-dien-1-yl)-2-(3,5-dimethoxyphenyl)-4-ethylloxazol-5(4H)-one (**4i**)

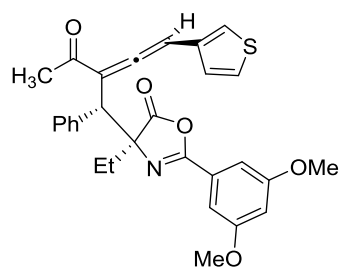

34 mg, 68% yield.  $^1\text{H}$  NMR (400 MHz,  $\text{CDCl}_3$ )  $\delta$  7.41 (s, 1H), 7.39 – 7.30 (m, 4H), 7.17 (m, 3H), 6.89 (s, 1H), 6.84 (d,  $J = 2.3$  Hz, 2H), 6.55 (t,  $J = 2.2$  Hz, 1H), 4.76 (s, 1H), 3.61 (s, 6H), 2.30 (s, 3H), 2.18 – 1.92 (m, 2H), 0.82 (t,  $J = 7.4$  Hz, 3H).  $^{13}\text{C}$  NMR (101 MHz,  $\text{CDCl}_3$ )  $\delta$  218.2, 196.6, 178.7, 160.9, 160.5, 137.9, 132.6, 129.7, 128.3, 127.9, 127.5, 127.2, 126.6, 123.6, 111.1, 106.0, 105.2, 95.4, 77.9, 55.5, 47.3, 29.8, 26.9, 8.5.  $[\alpha]_{\text{D}}^{25} = -264.60$  (c 1.0,  $\text{CHCl}_3$ ). IR:  $\nu = 3006, 2989, 2032, 1932, 1805, 1679, 1653, 1598$   $\text{cm}^{-1}$ . HRMS:  $m/z$  (ESI) calculated for  $\text{C}_{29}\text{H}_{28}\text{NO}_5\text{S}^+$ : 502.1683, found: 502.1675  $[\text{M}+\text{H}]^+$ . HPLC: Chiralpak IA column, 90:10 hexanes/isopropanol, 1 ml/min;  $t_{\text{R}} = 6.9$  min (minor), 8.0 min (major); 99% ee.

(*S*)-4-((*1R,3S*)-2-acetyl-4-(cyclohex-1-en-1-yl)-1-phenylbuta-2,3-dien-1-yl)-2-(3,5-dimethoxyphenyl)-4-ethylloxazol-5(4H)-one (**4j**)

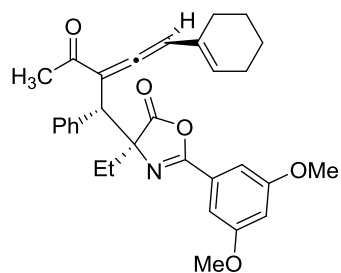

27 mg, 54% yield.  $^1\text{H}$  NMR (400 MHz,  $\text{CDCl}_3$ )  $\delta$  7.31 (dd,  $J = 6.6, 2.9$  Hz, 2H), 7.14 (m, 3H), 7.02 (d,  $J = 2.3$  Hz, 2H), 6.62 (t,  $J = 2.3$  Hz, 1H), 6.46 (s, 1H), 5.94 (s, 1H), 4.69 (s, 1H), 3.80 (s, 6H), 2.65 (d,  $J = 16.1$  Hz, 1H), 2.28 (s, 3H), 2.25 – 1.92 (m, 5H), 1.77 – 1.57 (m, 4H), 0.76 (t,  $J = 7.4$  Hz, 3H).  $^{13}\text{C}$  NMR (101 MHz,  $\text{CDCl}_3$ )  $\delta$  216.9, 197.4, 178.9, 161.0, 160.1, 138.3, 131.1, 129.7, 128.2, 127.7, 127.7, 111.4, 105.6, 105.4, 104.1, 78.2, 55.7, 47.0, 29.6, 26.9, 26.5, 26.2, 22.6, 22.3, 8.4.  $[\alpha]_{\text{D}}^{25} = -184.10$  (c 1.0,  $\text{CHCl}_3$ ). IR:  $\nu = 3006, 2989, 2048, 1802, 1673, 1595$   $\text{cm}^{-1}$ . HRMS:  $m/z$  (ESI) calculated for  $\text{C}_{31}\text{H}_{34}\text{NO}_5^+$ : 500.2431, found: 500.2422  $[\text{M}+\text{H}]^+$ . HPLC: Chiralpak IA column, 90:10 hexanes/isopropanol, 1 ml/min;  $t_{\text{R}} = 5.4$  min (minor), 5.9 min (major); 97% ee.

(*S*)-4-((*1R,3S*)-2-acetyl-1-phenylocta-2,3-dien-1-yl)-2-(3,5-dimethoxyphenyl)-4-ethyloxazol-5(4H)-one  
(**4k**)

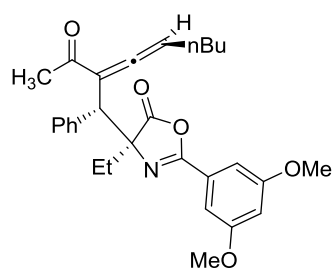

32 mg, 67% yield.  $^1\text{H}$  NMR (400 MHz,  $\text{CDCl}_3$ )  $\delta$  7.34 (dd,  $J = 6.4, 2.9$  Hz, 2H), 7.21 – 7.11 (m, 3H), 7.05 (d,  $J = 2.3$  Hz, 2H), 6.63 (t,  $J = 2.2$  Hz, 1H), 5.81 (t,  $J = 7.1$  Hz, 1H), 4.64 (s, 1H), 3.82 (s, 6H), 2.34 (dd,  $J = 15.2, 7.0$  Hz, 2H), 2.24 (s, 3H), 1.95 (dt,  $J = 13.5, 6.7$  Hz, 2H), 1.61 (dd,  $J = 15.4, 7.5$  Hz, 2H), 1.41 (dd,  $J = 14.9, 7.4$  Hz, 2H), 0.93 (t,  $J = 7.3$  Hz, 3H), 0.75 (t,  $J = 7.4$  Hz, 3H).  $^{13}\text{C}$  NMR (101 MHz,  $\text{CDCl}_3$ )  $\delta$  213.9, 197.7, 179.0, 161.0, 160.0, 138.1, 129.9, 128.1, 127.8, 127.6, 108.7, 105.6, 105.3, 98.3, 77.7, 55.7, 47.0, 31.3, 29.7, 28.7, 26.6, 22.7, 14.0, 8.3.  $[\alpha]_{\text{D}}^{25} = -127.30$  (c 1.0,  $\text{CHCl}_3$ ). IR:  $\nu = 2961, 1945, 1802, 1673, 1595$   $\text{cm}^{-1}$ . HRMS:  $m/z$  (ESI) calculated for  $\text{C}_{29}\text{H}_{34}\text{NO}_5^+$ : 476.2431, found: 476.2433  $[\text{M}+\text{H}]^+$ . HPLC: Chiralpak IB column, 98:02 hexanes/isopropanol, 0.5 ml/min;  $t_{\text{R}} = 12.6$  min (major), 13.3 min (minor); 95% ee.

(*S*)-4-((*1R,3S*)-2-acetyl-4-phenyl-1-(*p*-tolyl)buta-2,3-dien-1-yl)-2-(3,5-dimethoxyphenyl)-4-ethyloxazol-5(4H)-one (**4l**)

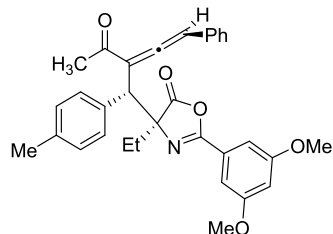

33 mg, 65% yield.  $^1\text{H NMR}$  (400 MHz,  $\text{CDCl}_3$ )  $\delta$  7.54 (d,  $J = 7.3$  Hz, 2H), 7.36 (t,  $J = 7.5$  Hz, 2H), 7.27 (m, 3H), 6.99 (d,  $J = 7.9$  Hz, 2H), 6.84 – 6.75 (m, 3H), 6.53 (t,  $J = 2.3$  Hz, 1H), 4.74 (s, 1H), 3.53 (s, 6H), 2.30 (s, 3H), 2.25 (s, 3H), 2.17 – 2.01 (m, 2H), 0.82 (t,  $J = 7.4$  Hz, 3H).  $^{13}\text{C NMR}$  (101 MHz,  $\text{CDCl}_3$ )  $\delta$  217.6, 196.7, 178.8, 160.8, 160.3, 137.5, 134.9, 132.0, 129.5, 129.1, 129.0, 128.2, 128.2, 127.5, 112.1, 106.0, 105.2, 100.8, 77.9, 55.4, 47.1, 30.0, 26.9, 21.2, 8.4.  $[\alpha]_{\text{D}}^{25} = -337.70$  (c 1.0,  $\text{CHCl}_3$ ). IR:  $\nu = 3006, 2989, 2840, 1928, 1825, 1802, 1679, 1653, 1598$   $\text{cm}^{-1}$ . HRMS:  $m/z$  (ESI) calculated for  $\text{C}_{32}\text{H}_{32}\text{NO}_5^+$ : 510.2275, found: 510.2270  $[\text{M}+\text{H}]^+$ . HPLC: Chiralpak IA column, 90:10 hexanes/isopropanol, 1 ml/min;  $t_{\text{R}} = 6.1$  min (minor), 7.8 min (major); 96% ee.

(*S*)-4-((*1R,3S*)-2-acetyl-1-(4-fluorophenyl)-4-phenylbuta-2,3-dien-1-yl)-2-(3,5-dimethoxyphenyl)-4-ethyloxazol-5(4H)-one (**4m**)

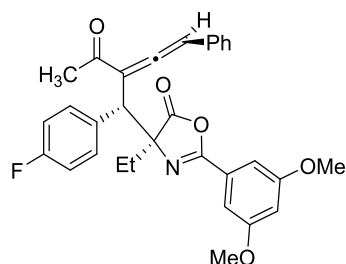

40 mg, 78% yield.  $^1\text{H NMR}$  (400 MHz,  $\text{CDCl}_3$ )  $\delta$  7.53 (d,  $J = 7.3$  Hz, 2H), 7.42 – 7.31 (m, 4H), 7.29 (d,  $J = 7.3$  Hz, 1H), 6.86 (t,  $J = 8.7$  Hz, 2H), 6.82 (s, 1H), 6.78 (d,  $J = 2.3$  Hz, 2H), 6.53 (t,  $J = 2.2$  Hz, 1H), 4.76 (s, 1H), 3.53 (s, 6H), 2.31 (s, 3H), 2.12 – 1.98 (m, 2H), 0.82 (t,  $J = 7.4$  Hz, 3H).  $^{13}\text{C NMR}$  (101 MHz,  $\text{CDCl}_3$ )  $\delta$  217.4, 196.7, 178.7, 162.40 (d,  $J = 246.6$  Hz), 160.9, 160.5, 133.7 (d,  $J = 3.2$  Hz), 131.7, 131.3 (d,  $J = 8.0$  Hz), 129.1, 128.4, 128.2, 127.2, 115.2 (d,  $J = 21.2$  Hz), 111.8, 106.1, 105.2, 101.1, 77.8, 55.4, 46.6, 29.9, 26.9, 8.4.  $^{19}\text{F NMR}$  (376 MHz,  $\text{CDCl}_3$ )  $\delta$  -114.54.  $[\alpha]_{\text{D}}^{25} = -265.80$  (c 1.0,  $\text{CHCl}_3$ ). IR:  $\nu = 3006, 2989, 2032, 1805, 1679, 1653, 1599$   $\text{cm}^{-1}$ . HRMS:  $m/z$  (ESI) calculated for

$C_{31}H_{29}FNO_5^+$ : 514.2024, found: 514.2020  $[M+H]^+$ . HPLC: Chiralpak IA column, 90:10 hexanes/isopropanol, 1 ml/min;  $t_R$  = 6.1 min (minor), 7.4 min (major); 94% ee.

(*S*)-4-((*IR,3S*)-2-acetyl-1-(4-chlorophenyl)-4-phenylbuta-2,3-dien-1-yl)-2-(3,5-dimethoxyphenyl)-4-ethyloxazol-5(4H)-one (**4n**)

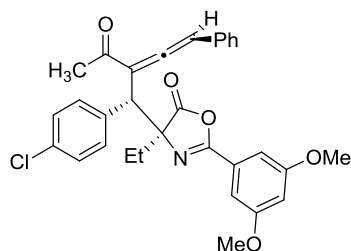

40 mg, 76% yield.  $^1H$  NMR (400 MHz,  $CDCl_3$ )  $\delta$  7.53 (d,  $J$  = 7.3 Hz, 2H), 7.33 (dt,  $J$  = 15.9, 7.3 Hz, 5H), 7.15 (d,  $J$  = 8.5 Hz, 2H), 6.82 (s, 1H), 6.78 (d,  $J$  = 2.3 Hz, 2H), 6.54 (t,  $J$  = 2.2 Hz, 1H), 4.75 (s, 1H), 3.54 (s, 6H), 2.30 (s, 3H), 2.06 (dt,  $J$  = 11.0, 6.6 Hz, 2H), 0.81 (t,  $J$  = 7.4 Hz, 3H).  $^{13}C$  NMR (101 MHz,  $CDCl_3$ )  $\delta$  217.3, 196.6, 178.6, 160.9, 160.6, 136.4, 133.9, 131.6, 131.0, 129.1, 128.5, 128.4, 128.2, 127.2, 111.6, 106.1, 105.2, 101.2, 77.6, 55.4, 46.8, 30.0, 26.9, 8.3.  $[\alpha]_D^{25}$  = -300.40 (c 1.0,  $CHCl_3$ ). IR:  $\nu$  = 3006, 2989, 2026, 1928, 1805, 1679, 1653, 1598  $cm^{-1}$ . HRMS:  $m/z$  (ESI) calculated for  $C_{31}H_{29}ClNO_5^+$ : 530.1729, found: 530.1725  $[M+H]^+$ . HPLC: Chiralpak IA column, 90:10 hexanes/isopropanol, 1 ml/min;  $t_R$  = 6.5 min (minor), 7.5 min (major); 97% ee.

(*S*)-4-((*IR,3S*)-2-acetyl-1-(4-methoxyphenyl)-4-phenylbuta-2,3-dien-1-yl)-2-(3,5-dimethoxyphenyl)-4-ethyloxazol-5(4H)-one (**4o**)

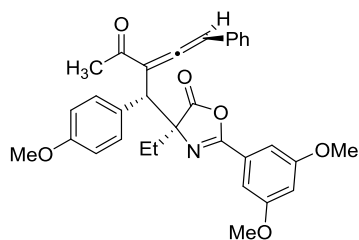

41 mg, 78% yield.  $^1H$  NMR (400 MHz,  $CDCl_3$ )  $\delta$  7.54 (d,  $J$  = 7.3 Hz, 2H), 7.36 (t,  $J$  = 7.5 Hz, 2H), 7.32 – 7.27 (m, 3H), 6.83 – 6.76 (m, 3H), 6.71 (d,  $J$  = 8.7 Hz, 2H), 6.52 (t,  $J$  = 2.2 Hz, 1H), 4.73 (s, 1H), 3.72 (s, 3H), 3.52 (s, 6H), 2.30 (s, 3H), 2.15 – 2.00 (m, 2H), 0.82 (t,  $J$  = 7.4 Hz, 3H).  $^{13}C$  NMR (101 MHz,  $CDCl_3$ )  $\delta$  217.6, 196.8, 178.9, 160.8, 160.3, 159.1, 132.0, 130.7, 130.0, 129.0, 128.3, 128.2, 127.5, 113.7, 112.2, 106.0, 105.2, 100.8, 78.1, 55.4, 55.2, 46.7, 29.9, 26.9, 8.5.  $[\alpha]_D^{25}$  = -273.40 (c 1.0,

CHCl<sub>3</sub>). IR:  $\nu = 3006, 2840, 2032, 1928, 1805, 679, 1653, 1599 \text{ cm}^{-1}$ . HRMS:  $m/z$  (ESI) calculated for C<sub>32</sub>H<sub>32</sub>NO<sub>6</sub><sup>+</sup>: 526.2224, found: 526.2219 [M+H]<sup>+</sup>. HPLC: Chiralpak IA column, 90:10 hexanes/isopropanol, 1 ml/min;  $t_R = 7.7 \text{ min}$  (minor), 10.5 min (major); 95% ee.

(*S*)-4-((*1R,3S*)-2-acetyl-1-(naphthalen-2-yl)-4-phenylbuta-2,3-dien-1-yl)-2-(3,5-dimethoxyphenyl)-4-ethylloxazol-5(4H)-one (**4p**)

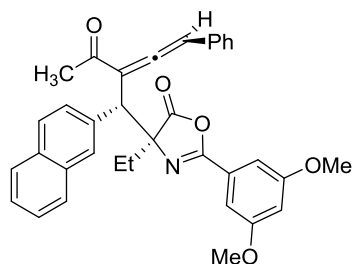

32 mg, 59% yield. <sup>1</sup>H NMR (400 MHz, CDCl<sub>3</sub>)  $\delta$  7.85 (s, 1H), 7.77 – 7.67 (m, 2H), 7.64 (d,  $J = 8.6 \text{ Hz}$ , 1H), 7.55 (m, 3H), 7.39 (m, 4H), 7.30 (d,  $J = 7.3 \text{ Hz}$ , 1H), 6.85 (s, 1H), 6.79 (d,  $J = 2.2 \text{ Hz}$ , 2H), 6.54 (t,  $J = 2.2 \text{ Hz}$ , 1H), 4.96 (s, 1H), 3.54 (s, 6H), 2.31 (s, 3H), 2.14 (dd,  $J = 14.7, 7.1 \text{ Hz}$ , 2H), 0.84 (t,  $J = 7.4 \text{ Hz}$ , 3H). <sup>13</sup>C NMR (101 MHz, CDCl<sub>3</sub>)  $\delta$  217.4, 196.7, 178.7, 160.8, 160.6, 135.4, 133.2, 132.8, 131.9, 129.3, 129.1, 128.4, 128.2, 128.2, 127.9, 127.5, 127.4, 127.0, 126.1, 126.1, 111.9, 106.2, 105.1, 101.1, 77.8, 55.4, 47.7, 30.1, 26.9, 8.4.  $[\alpha]_D^{25} = -347.00$  (c 1.0, CHCl<sub>3</sub>). IR:  $\nu = 3006, 2989, 1813, 1680, 1652, 1599 \text{ cm}^{-1}$ . HRMS:  $m/z$  (ESI) calculated for C<sub>35</sub>H<sub>32</sub>NO<sub>5</sub><sup>+</sup>: 546.2275, found: 546.2269 [M+H]<sup>+</sup>. HPLC: Chiralpak IA column, 90:10 hexanes/isopropanol, 1 ml/min;  $t_R = 8.2 \text{ min}$  (minor), 10.2 min (major); 97% ee.

(*S*)-4-((*1R,3S*)-2-acetyl-1-cyclohexyl-4-phenylbuta-2,3-dien-1-yl)-2-(3,5-dimethoxyphenyl)-4-ethylloxazol-5(4H)-one (**4q**)

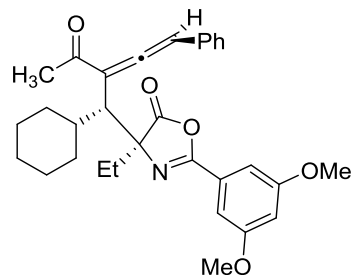

25 mg, 50% yield. <sup>1</sup>H NMR (400 MHz, CDCl<sub>3</sub>)  $\delta$  7.50 (d,  $J = 7.5 \text{ Hz}$ , 2H), 7.36 (t,  $J = 7.5 \text{ Hz}$ , 2H), 7.27 (d,  $J = 9.0 \text{ Hz}$ , 1H), 6.88 (d,  $J = 2.2 \text{ Hz}$ , 2H), 6.72 (s, 1H), 6.54 (t,  $J = 2.1 \text{ Hz}$ , 1H), 3.54 (s, 6H),

3.42 (d,  $J = 6.4$  Hz, 1H), 2.36 (s, 3H), 1.98 (q,  $J = 7.3$  Hz, 2H), 1.75 – 1.53 (m, 7H), 1.06 (m, 4H), 0.74 (t,  $J = 7.4$  Hz, 3H).  $^{13}\text{C}$  NMR (101 MHz,  $\text{CDCl}_3$ )  $\delta$  217.6, 197.7, 180.4, 160.9, 159.6, 132.5, 129.0, 128.1, 128.0, 127.7, 111.3, 105.9, 105.3, 99.8, 76.6, 55.5, 40.9, 32.6, 30.7, 30.1, 26.8, 26.5, 26.3, 7.8.  $[\alpha]_{\text{D}}^{25} = -225.00$  (c 1.0,  $\text{CHCl}_3$ ). IR:  $\nu = 3006, 2991, 1718, 1641, 1561$   $\text{cm}^{-1}$ . HRMS:  $m/z$  (ESI) calculated for  $\text{C}_{31}\text{H}_{36}\text{NO}_5^+$ : 502.2588, found: 502.2587  $[\text{M}+\text{H}]^+$ . HPLC: Chiralpak IA column, 90:10 hexanes/isopropanol, 1 ml/min;  $t_{\text{R}} = 5.2$  min (minor), 6.5 min (major); 99% ee.

(*S*)-4-((*IR,3S*)-2-acetyl-1,4-diphenylbuta-2,3-dien-1-yl)-4-butyl-2-(3,5-dimethoxyphenyl)oxazol-5(4H)-one (**4v**)

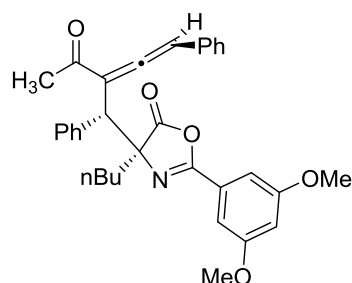

35 mg, 67% yield.  $^1\text{H}$  NMR (400 MHz,  $\text{CDCl}_3$ )  $\delta$  7.55 (d,  $J = 7.3$  Hz, 2H), 7.36 (t,  $J = 7.1$  Hz, 4H), 7.30 (d,  $J = 7.3$  Hz, 1H), 7.21 – 7.14 (m, 3H), 6.82 (s, 1H), 6.78 (d,  $J = 2.3$  Hz, 2H), 6.53 (t,  $J = 2.2$  Hz, 1H), 4.76 (s, 1H), 3.53 (s, 6H), 2.31 (s, 3H), 2.11 – 1.97 (m, 2H), 1.38 – 1.22 (m, 2H), 1.23 – 1.02 (m, 2H), 0.85 (t,  $J = 7.3$  Hz, 3H).  $^{13}\text{C}$  NMR (101 MHz,  $\text{CDCl}_3$ )  $\delta$  217.7, 196.7, 179.0, 160.8, 160.2, 137.8, 132.0, 129.7, 129.0, 128.3, 128.3, 128.2, 127.9, 127.5, 111.9, 106.0, 105.2, 100.8, 77.4, 55.4, 47.7, 36.2, 26.9, 26.2, 22.6, 14.0.  $[\alpha]_{\text{D}}^{25} = -259.20$  (c 1.0,  $\text{CHCl}_3$ ). IR:  $\nu = 3006, 2989, 1825, 1680, 1658, 1599$   $\text{cm}^{-1}$ . HRMS:  $m/z$  (ESI) calculated for  $\text{C}_{33}\text{H}_{34}\text{NO}_5^+$ : 524.2431, found: 524.2423  $[\text{M}+\text{H}]^+$ . HPLC: Chiralpak IA column, 90:10 hexanes/isopropanol, 1 ml/min;  $t_{\text{R}} = 5.6$  min (minor), 7.1 min (major); 99% ee.

(*S*)-4-((*IR,3S*)-2-acetyl-1,4-diphenylbuta-2,3-dien-1-yl)-4-benzyl-2-(3,5-dimethoxyphenyl)oxazol-5(4H)-one (**4w**)

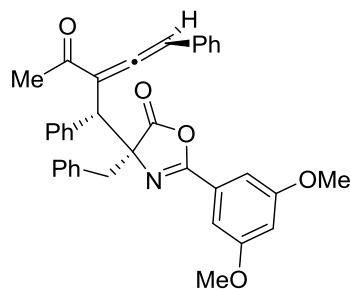

43 mg, 77% yield.  $^1\text{H}$  NMR (400 MHz,  $\text{CDCl}_3$ )  $\delta$  7.69 (d,  $J = 7.3$  Hz, 2H), 7.40 (m, 5H), 7.22 – 7.16 (m, 3H), 7.16 – 7.04 (m, 5H), 6.88 (s, 1H), 6.59 (d,  $J = 2.3$  Hz, 2H), 6.47 (t,  $J = 2.3$  Hz, 1H), 4.96 (s, 1H), 3.50 (s, 6H), 3.37 (dd,  $J = 32.1, 13.3$  Hz, 2H), 2.37 (s, 3H).  $^{13}\text{C}$  NMR (101 MHz,  $\text{CDCl}_3$ )  $\delta$  218.0, 196.8, 177.8, 160.6, 160.3, 137.8, 134.2, 131.9, 130.3, 129.7, 129.1, 128.4, 128.4, 128.2, 128.2, 127.9, 127.3, 127.2, 111.9, 105.8, 105.0, 101.0, 78.5, 55.4, 47.7, 42.7, 26.9.  $[\alpha]_{\text{D}}^{25} = 349.00$  (c 1.0,  $\text{CHCl}_3$ ). IR:  $\nu = 3006, 2963, 2843, 1928, 1812, 1679, 1653, 1596$   $\text{cm}^{-1}$ . HRMS:  $m/z$  (ESI) calculated for  $\text{C}_{36}\text{H}_{32}\text{NO}_5^+$ : 558.2275, found: 558.2267  $[\text{M}+\text{H}]^+$ . HPLC: Chiralpak IC column, 90:10 hexanes/isopropanol, 1 ml/min;  $t_{\text{R}} = 13.7$  min (minor), 17.7 min (major); >99% ee.

(*S*)-4-((*1R,3S*)-2-acetyl-1,4-diphenylbuta-2,3-dien-1-yl)-2-(3,5-dimethoxyphenyl)-4-(2-(methylthio)ethyl)oxazol-5(4H)-one (**4x**)

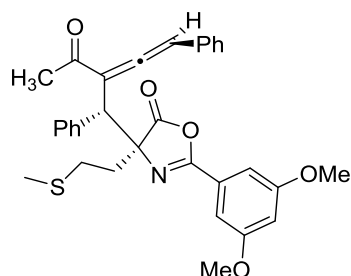

34 mg, 63% yield.  $^1\text{H}$  NMR (400 MHz,  $\text{CDCl}_3$ )  $\delta$  7.56 (d,  $J = 7.3$  Hz, 2H), 7.35 (ddt,  $J = 20.2, 14.7, 7.3$  Hz, 5H), 7.23 – 7.11 (m, 3H), 6.84 (s, 1H), 6.77 (d,  $J = 2.3$  Hz, 2H), 6.53 (t,  $J = 2.2$  Hz, 1H), 4.76 (s, 1H), 3.52 (s, 6H), 2.55 – 2.33 (m, 4H), 2.32 (s, 3H), 2.04 (s, 3H).  $^{13}\text{C}$  NMR (101 MHz,  $\text{CDCl}_3$ )  $\delta$  218.0, 196.7, 178.5, 161.0, 160.8, 137.3, 131.8, 129.6, 129.1, 128.4, 128.2, 128.0, 127.3, 111.6, 106.2, 105.2, 100.9, 76.5, 55.4, 47.6, 35.5, 28.8, 26.9, 15.4.  $[\alpha]_{\text{D}}^{25} = -295.30$  (c 1.0,  $\text{CHCl}_3$ ). IR:  $\nu = 3006, 2989, 2035, 1805, 1679, 1651, 1599$   $\text{cm}^{-1}$ . HRMS:  $m/z$  (ESI) calculated for  $\text{C}_{32}\text{H}_{32}\text{NO}_5\text{S}^+$ : 542.1996, found: 542.1993  $[\text{M}+\text{H}]^+$ . HPLC: Chiralpak IA column, 90:10 hexanes/isopropanol, 1 ml/min;  $t_{\text{R}} = 7.5$  min (minor), 9.7 min (major); 94% ee.

tert-butyl(4-((*S*)-4-((*IR,3S*)-2-acetyl-1,4-diphenylbuta-2,3-dien-1-yl)-2-(3,5-dimethoxyphenyl)-5-oxo-4,5-dihydrooxazol-4-yl)butyl)carbamate (**4y**)

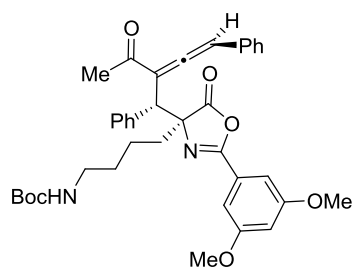

42 mg, 66% yield.  $^1\text{H NMR}$  (400 MHz,  $\text{CDCl}_3$ )  $\delta$  7.52 (d,  $J = 7.4$  Hz, 2H), 7.43 – 7.32 (m, 4H), 7.29 (d,  $J = 7.3$  Hz, 1H), 7.17 (dd,  $J = 5.0, 1.4$  Hz, 3H), 6.82 (s, 1H), 6.77 (d,  $J = 2.2$  Hz, 2H), 6.53 (t,  $J = 2.2$  Hz, 1H), 4.74 (s, 1H), 4.47 (s, 1H), 3.54 (s, 6H), 3.15 – 2.90 (m, 2H), 2.30 (s, 3H), 2.14 – 1.92 (m, 2H), 1.57 – 1.33 (m, 11H), 1.08 – 1.25 (m, 2H).  $^{13}\text{C NMR}$  (101 MHz,  $\text{CDCl}_3$ )  $\delta$  217.6, 196.7, 178.8, 160.8, 160.4, 156.0, 137.6, 131.9, 129.7, 129.1, 128.3, 128.1, 127.9, 127.3, 111.7, 106.1, 105.2, 100.9, 79.2, 77.4, 55.4, 47.7, 40.3, 36.2, 30.1, 28.5, 26.9, 21.5.  $[\alpha]_{\text{D}}^{25} = -221.2$  (c 1.0,  $\text{CHCl}_3$ ). IR:  $\nu = 3006, 2991, 1715, 1639, 1560$   $\text{cm}^{-1}$ . HRMS:  $m/z$  (ESI) calculated for  $\text{C}_{38}\text{H}_{43}\text{N}_2\text{O}_7^+$ : 639.3065, found: 639.3065  $[\text{M}+\text{H}]^+$ . HPLC: Chiralpak IA column, 90:10 hexanes/isopropanol, 1 ml/min;  $t_{\text{R}} = 10.2$  min (minor), 12.6 min (major); 98% ee.

### Large scale Experiments:

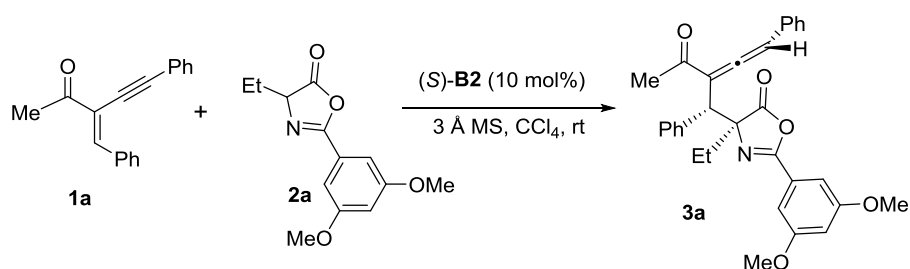

To a dried 50 mL flask was added **1a** (740 mg, 3.0 mmol), **2a** (500 mg, 2.0 mmol), (*S*)-**B2** cat (120 mg, 0.2 mmol), activated 3 Å molecular sieves (2.0 g). The flask was purged with  $\text{N}_2$  for 3 times and then followed by adding  $\text{CCl}_4$  (10 mL). After stirring for 24 h, the reaction mixture was quenched by adding  $\text{K}_2\text{CO}_3$  and filtered. The filtrate was concentrated under vacuum to give a residue, which was purified by flash column chromatography (PE:EA, 12:1) to give the allene product **3a** (760 mg, 77% yield, 91% ee).



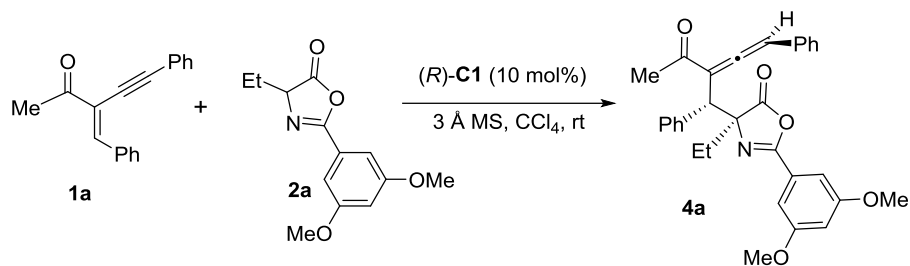

To a dried 50 ml flask was added **1a** (300 mg, 1.2 mmol), **2a** (200 mg, 0.8 mmol),  $(R)\text{-C1}$  cat (50mg 0.08 mmol), activated 3 Å molecular sieves (0.8 g). The flask was purged with  $\text{N}_2$  for 3 times and then followed by adding  $\text{CCl}_4$  (4 mL). After stirring for 24 h, the reaction mixture was quenched by adding  $\text{K}_2\text{CO}_3$  and filtered. The filtrate was then concentrated under vacuum to give a residue, which was purified by flash column chromatography (PE:EA, 12:1) to give the allene product **4a** (290 mg, 75% yield, 97% ee).

### Mechanistic Study

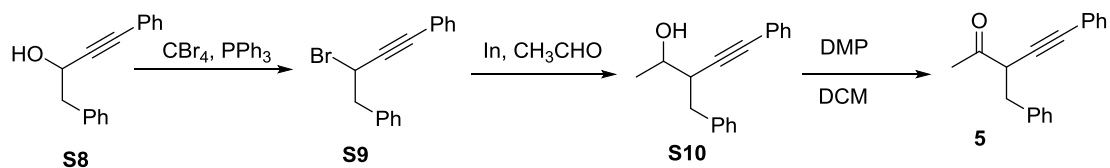

### General procedure for synthesis of **5a**:

To a solution of  $\text{CBr}_4$  (5.3g, 16 mmol) in DCM (50 mL) was added **S8** (2.97 g, 13 mmol) at  $0^\circ\text{C}$ . After stirring at  $0^\circ\text{C}$  for an additional 10 min,  $\text{PPh}_3$  (5.3g, 20 mmol) was added and the reaction mixture was allowed to stir at RT. After consumption of the starting material by TLC monitoring, the reaction mixture was concentrated under vacuum gave a residue, which was purified by flash column chromatography (PE) to give the product **S9** (3.8 g, 99%).

**S9** (1.9 g, 6.7 mmol) was added to a well stirred suspension of the acetaldehyde (0.66mL, 5.0 M, 3.3 mmol) and indium powder (0.76 g, 6.7 mmol) in THF/ $\text{H}_2\text{O}$  (1:1, 16 mL) at  $0^\circ\text{C}$ .  $\text{NH}_4\text{Cl}$  (aq. sat.) (23 mL) was added after one hour and the reaction was stirred at room temperature until disappearance of the starting material (TLC). The reaction mixture was extracted with ethyl acetate (3 x 10 mL). The organic extract was washed with brine, dried ( $\text{MgSO}_4$ ) and concentrated under reduced pressure. Chromatography of the residue using ethyl acetate/hexanes mixtures gave a mixture of **S10** and allene byproduct. To a solution of the mixture product in DCM (10mL) was added  $\text{AgOTf}$  (20 mol%, 114 mg) at RT. After stirring for 12h, the reaction mixture was concentrated and purified by flash column

chromatography (PE:EA, 12:1) to give pure product **S10** (252 mg, 15% yield).

To a solution of **S10** (252 mg, 1.0 mmol) in DCM (10 mL) was added Dess-Martin periodinane (848 mg, 2.0 mmol) at RT. After consumption of the starting material by TLC monitoring, the reaction mixture was diluted with DCM and then quenched with adding H<sub>2</sub>O. The combined organic layers were dried over Na<sub>2</sub>SO<sub>4</sub> and concentrated under vacuum to give a residue, which was added 5 mL PE to give a suspension. After filter through celite, the filtrate was concentrated under vacuum to give **5a** (197 mg, 79% yield) as a green oil. <sup>1</sup>H NMR (500 MHz, Chloroform-*d*) δ 7.31 – 7.27 (m, 2H), 7.26 – 7.20 (m, 7H), 7.19 – 7.15 (m, 1H), 3.62 (dd, *J* = 8.5, 5.8 Hz, 1H), 3.13 (dd, *J* = 13.6, 5.8 Hz, 1H), 2.95 (dd, *J* = 13.6, 8.5 Hz, 1H), 2.27 (s, 3H). <sup>13</sup>C NMR (126 MHz, CDCl<sub>3</sub>) δ 204.5, 138.3, 131.6, 129.3, 128.4, 128.3, 126.7, 122.9, 86.2, 85.9, 48.1, 37.2, 28.4. IR: ν = 3069, 3024, 2956, 2922, 2853, 2203, 1715, 1665, 1591 cm<sup>-1</sup>. HRMS: *m/z* (ESI) calculated for C<sub>18</sub>H<sub>17</sub>O<sup>+</sup>: 249.1274, found: 249.1271 [M+H]<sup>+</sup>.

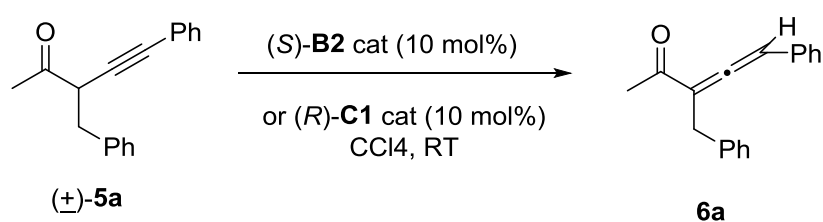

#### General procedure for asymmetric isomerization of **5a** to allene **6a**:

To a solution of **5a** (12.5mg 0.05 mmol) in CCl<sub>4</sub> (0.5 mL) was added (*S*)-**B2** cat (3.2 mg, 10 mol%) at RT. After stirring for 5h, the reaction mixture was purified by preparative TLC (PE:EA, 7:1) to give product **6a** (12 mg, 92% yield). HPLC: Chiralpak IC column, 99.7:0.3 hexanes/isopropanol, 1 ml/min; *t<sub>R</sub>* = 17.7 min (major), 18.9 min (minor); 80% ee.

To a solution of **5a** (12.5 mg, 0.05 mmol) in CCl<sub>4</sub> (0.5 mL) was added (*R*)-**C1** cat (2.8 mg, 10 mol%) at RT. After full conversion as indicated by HPLC analysis, the reaction mixture was purified by preparative TLC (PE:EA, 7:1) to give product **6a** (10 mg, 80% yield) HPLC: Chiralpak IC column, 99.7:0.3 hexanes/isopropanol, 1 ml/min; *t<sub>R</sub>* = 16.9 min (minor), 18.2 min (major); 48% ee.

<sup>1</sup>H NMR (400 MHz, Chloroform-*d*) δ 7.35 – 7.14 (m, 10H), 6.54 (t, *J* = 2.4 Hz, 1H), 3.72 – 3.56 (m, 2H), 2.30 (s, 3H). <sup>13</sup>C NMR (101 MHz, CDCl<sub>3</sub>) δ 215.7, 197.5, 139.3, 131.8, 129.0, 129.0, 128.3, 128.0, 127.1, 126.3, 113.0, 99.2, 33.6, 27.3. IR: ν = 3068, 2927, 1797, 1670 cm<sup>-1</sup>. HRMS: *m/z* (ESI) calculated for C<sub>18</sub>H<sub>17</sub>O<sup>+</sup>: 249.1274, found: 249.1270 [M+H]<sup>+</sup>.

## Derivatizations of chiral products:

(*S*)-2-(3,5-dimethoxyphenyl)-4-ethyl-4-((*R*)-(2-methyl-5-phenylfuran-3-yl)(phenyl)methyl)oxazol-5(4H)-one (**7a**)

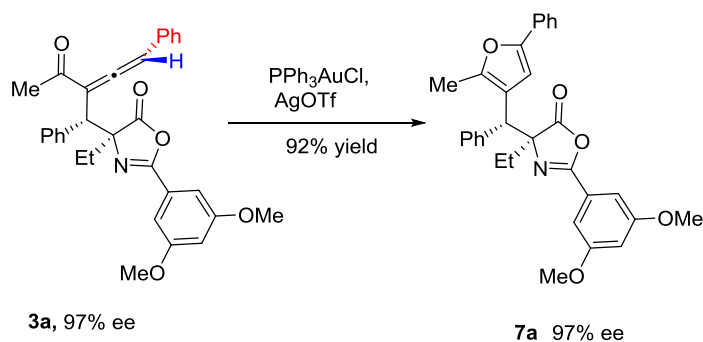

To a solution of **3a** (73 mg, 0.15 mmol) in DCM (1 mL) was added a solution of  $\text{PPh}_3\text{AuOTf}$  in DCM (0.015 mmol, in situ prepared by mixing  $\text{PPh}_3\text{AuCl}$  and  $\text{AgOTf}$  in DCM) at rt. After stirring for 0.5 h, the reaction mixture was purified by preparative TLC (PE:EA, 10:1) to give product **7a** (67 mg, 92% yield).  $^1\text{H}$  NMR (400 MHz,  $\text{CDCl}_3$ )  $\delta$  7.72 (d,  $J = 7.4$  Hz, 2H), 7.39 (t,  $J = 7.7$  Hz, 2H), 7.30 (d,  $J = 4.7$  Hz, 3H), 7.25 (d,  $J = 6.9$  Hz, 1H), 7.20 – 7.06 (m, 5H), 6.66 (t,  $J = 2.2$  Hz, 1H), 4.29 (s, 1H), 3.85 (s, 6H), 2.35 (s, 3H), 2.06 (dt,  $J = 14.9, 7.4$  Hz, 1H), 2.01 – 1.89 (m, 1H), 0.82 (t,  $J = 7.4$  Hz, 3H).  $^{13}\text{C}$  NMR (101 MHz,  $\text{CDCl}_3$ )  $\delta$  180.1, 161.0, 160.3, 151.6, 149.2, 138.4, 131.1, 129.3, 128.7, 128.3, 127.6, 127.4, 127.0, 123.6, 119.5, 107.2, 105.8, 105.1, 78.8, 55.8, 49.2, 29.5, 11.9, 8.4.  $[\alpha]_D^{25} = -188.90$  (c 1.0,  $\text{CHCl}_3$ ). IR:  $\nu = 3006, 2989, 2032, 1805, 1653, 596$   $\text{cm}^{-1}$ . HRMS:  $m/z$  (ESI) calculated for  $\text{C}_{31}\text{H}_{30}\text{NO}_5^+$ : 496.2118, found: 496.2113  $[\text{M}+\text{H}]^+$ . HPLC: Chiralpak IC column, 95:5 hexanes/isopropanol, 1 ml/min;  $t_R = 4.5$  min (major), 4.7 min (minor); 97% ee.

Methyl-(*S*)-2-(3,5-dimethoxybenzamido)-2-((*R*)-(2-methyl-5-phenylfuran-3-yl)(phenyl)methyl)butanoate (**8a**)

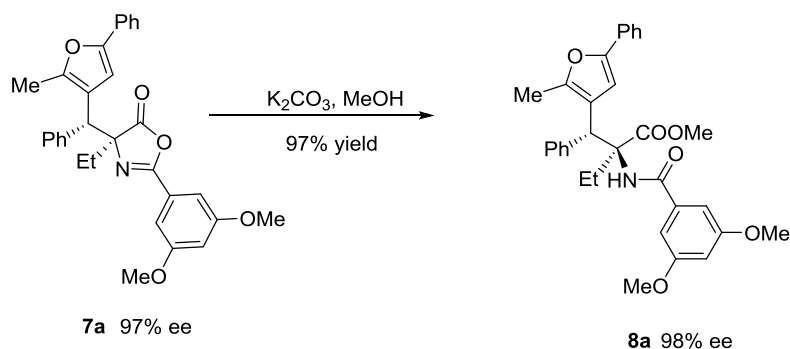

To a solution of **7a** (40 mg, 0.08 mmol) in MeOH (2mL) was added K<sub>2</sub>CO<sub>3</sub> (6mg, 0.04mmol) at RT. After consumption of the starting material by TLC monitoring, the reaction mixture was filtered through celite and the filtrate was concentrated under vacuum to give a residue, which was purified with flash column chromatography (PE:EA, 10:1) to give the product **8a** (39 mg, 97% yield). <sup>1</sup>H NMR (400 MHz, CDCl<sub>3</sub>) δ 7.61 (d, *J* = 7.7 Hz, 2H), 7.44 (d, *J* = 7.5 Hz, 2H), 7.38 – 7.28 (m, 4H), 7.22 (dd, *J* = 13.9, 6.8 Hz, 2H), 7.15 (s, 1H), 6.81 – 6.67 (m, 2H), 6.52 (s, 1H), 5.14 (s, 1H), 3.76 (s, 3H), 3.70 (s, 6H), 2.94 (dq, *J* = 14.5, 7.2 Hz, 1H), 2.18 (s, 3H), 1.95 (dq, *J* = 14.2, 7.1 Hz, 1H), 1.59 (d, *J* = 4.5 Hz, 1H), 0.77 (t, *J* = 7.2 Hz, 3H). <sup>13</sup>C NMR (101 MHz, CDCl<sub>3</sub>) δ 174.0, 166.6, 161.0, 151.6, 150.5, 139.6, 137.9, 131.0, 130.3, 128.7, 128.0, 127.1, 123.4, 119.6, 105.7, 104.5, 104.0, 69.4, 55.6, 52.6, 47.4, 26.9, 11.8, 9.0. [α]<sub>D</sub><sup>25</sup> = -20.10 (c 1.0, CHCl<sub>3</sub>). IR: ν = 3404, 2955, 2032, 1805, 1653, 1596 cm<sup>-1</sup>. HRMS: *m/z* (ESI) calculated for C<sub>32</sub>H<sub>34</sub>NO<sub>6</sub><sup>+</sup>: 528.2381, found: 528.2374 [M+H]<sup>+</sup>. HPLC: Chiralpak IC column, 95:5 hexanes/isopropanol, 1 ml/min; t<sub>R</sub> = 15.2 min (major), 19.6 min (minor); 98% ee.

*N*-((3*S*,4*R*,6*R*)-3-ethyl-6-methyl-2-oxo-4-phenyl-5-((*R*)-2-phenylvinylidene)tetrahydro-2H-pyran-3-yl)-3,5-dimethoxybenzamide (**9a**)

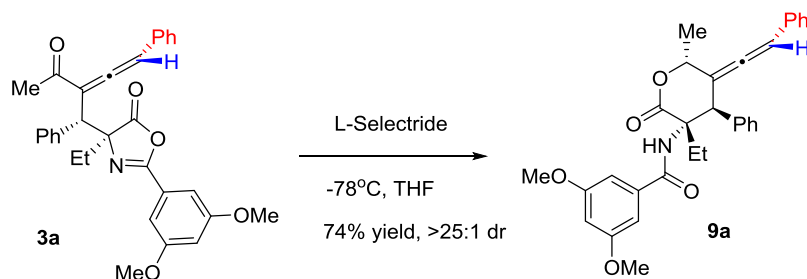

To a solution of **3a** (532mg, 1.0 mmol) in THF (10mL) was added L-Selectride (1.0 M, 1.8 mL, 1.8 mmol) at -78 °C. After consumption of the starting material by TLC monitoring, the reaction was quenched by H<sub>2</sub>O and then extracted with EA for 3 times. The combined organic layers were dried over Na<sub>2</sub>SO<sub>4</sub> and concentrated under vacuum to give a residue, which was purified with flash column chromatography (PE:EA, 4:1) to give the product **9a** (396 mg, 74% yield). <sup>1</sup>H NMR (500 MHz, CDCl<sub>3</sub>) δ 7.29 (dd, *J* = 7.6, 1.4 Hz, 2H), 7.22 (dd, *J* = 14.2, 7.4 Hz, 5H), 7.16 (d, *J* = 6.6 Hz, 1H), 7.14 – 7.10 (m, 2H), 6.78 (d, *J* = 2.2 Hz, 2H), 6.57 (d, *J* = 1.0 Hz, 1H), 6.39 (dd, *J* = 4.5, 2.9 Hz, 1H), 5.82 (s, 1H), 5.43 (d, *J* = 4.6 Hz, 1H), 5.34 (dd, *J* = 6.3, 2.1 Hz, 1H), 3.79 (d, *J* = 2.1 Hz, 6H), 2.20 (dd, *J* = 14.8, 7.5 Hz, 1H), 1.78 (d, *J* = 6.4 Hz, 3H), 1.69 (dt, *J* = 15.0, 7.5 Hz, 1H), 1.03 (t, *J* = 7.5 Hz, 3H). <sup>13</sup>C NMR (126 MHz, CDCl<sub>3</sub>) δ 201.2, 169.2, 167.7, 161.0, 136.6, 135.7, 133.4, 130.6, 128.8, 128.0, 127.9, 127.7,

126.9, 106.6, 105.1, 103.9, 100.7, 75.8, 62.4, 55.7, 44.5, 26.0, 22.6, 8.4.  $[\alpha]_D^{25} = 245.40$  (c 1.0,  $\text{CHCl}_3$ ).  
 IR:  $\nu = 3059, 2989, 2032, 1743, 1664, 1595 \text{ cm}^{-1}$ . HRMS:  $m/z$  (ESI) calculated for  $\text{C}_{31}\text{H}_{32}\text{NO}_5^+$ :  
 498.2275, found: 498.2266  $[\text{M}+\text{H}]^+$ . HPLC: Chiralpak IA column, 80:20 hexanes/isopropanol, 1  
 ml/min;  $t_R = 6.8 \text{ min}$  (minor), 13.7 min (major); 91% ee.

*N*-((3*S*,4*R*,6*R*)-5-((*R*)-1-hydroxyethyl)-4,7-diphenyl-3-(propylcarbamoyl)hepta-5,6-dien-3-yl)-3,5-dime-  
 thoxybenzamide (**10a**)

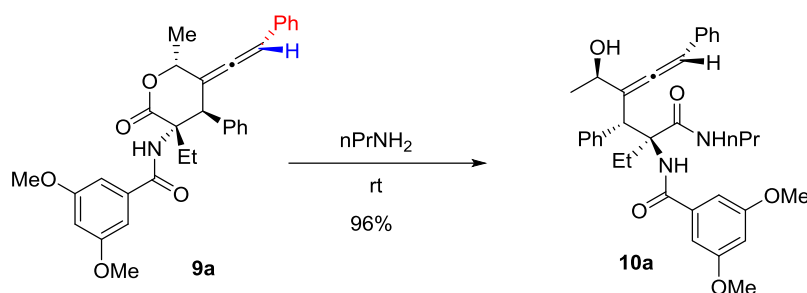

To a flask containing **9a** (50 mg, 0.1 mmol) was added  $\text{nPrNH}_2$  (0.5 mL) at rt. After stirring for 36 h, the reaction mixture was concentrated under vacuum to give a residue, which was purified with flash column chromatography (DCM) to give the product **10a** (54 mg, 96% yield).  $^1\text{H}$  NMR (500 MHz,  $\text{CDCl}_3$ )  $\delta$  8.35 (s, 1H), 7.56 (dd,  $J = 6.2, 3.0 \text{ Hz}$ , 2H), 7.38 – 7.29 (m, 7H), 7.25 – 7.22 (m, 1H), 7.02 (d,  $J = 2.2 \text{ Hz}$ , 2H), 6.61 (t,  $J = 2.2 \text{ Hz}$ , 1H), 6.50 (s, 1H), 5.16 (t,  $J = 4.9 \text{ Hz}$ , 1H), 5.04 (s, 1H), 4.21 (d,  $J = 5.3 \text{ Hz}$ , 1H), 3.86 (s, 6H), 3.11 – 2.95 (m, 2H), 2.79 (ddd,  $J = 13.4, 8.3, 5.8 \text{ Hz}$ , 1H), 1.27 (dd,  $J = 13.6, 6.6 \text{ Hz}$ , 1H), 1.18 (d,  $J = 6.4 \text{ Hz}$ , 3H), 1.10 (dd,  $J = 15.9, 8.0 \text{ Hz}$ , 2H), 0.71 (t,  $J = 7.2 \text{ Hz}$ , 3H), 0.61 (t,  $J = 7.4 \text{ Hz}$ , 3H).  $^{13}\text{C}$  NMR (126 MHz,  $\text{CDCl}_3$ )  $\delta$  202.6, 170.7, 166.3, 161.2, 138.8, 137.9 – 137.5 (m), 134.7 – 134.3 (m), 131.4, 128.9, 128.6, 128.2, 127.6, 127.2, 112.4, 104.9, 103.9, 100.9, 70.2, 67.1, 55.8, 48.9, 41.9, 28.4, 22.8, 22.1, 11.5, 8.1.

3,5-dimethoxy-*N*-((1*R*,2*S*)-1-((2*R*,5*S*)-2-methyl-5-phenyl-2,5-dihydrofuran-3-yl)-1-phenyl-2-(propylca-  
 rbamoyl)butan-2-yl)benzamide (**11a**)

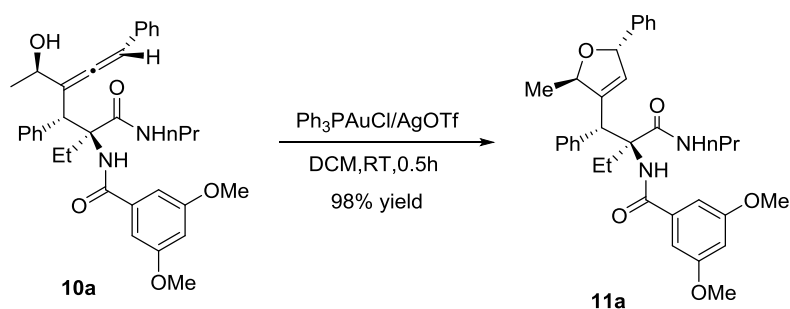

To a solution of **10a** (43 mg, 0.078 mmol) in DCM (1 mL) was added a solution of PPh<sub>3</sub>AuOTf in DCM (0.008 mmol, in situ prepared by mixing PPh<sub>3</sub>AuCl and AgOTf in DCM) at rt. After stirring for 0.5 h, the reaction mixture was purified by preparative TLC (PE:EA, 4:1) to give product **11a** (42 mg, 98% yield). <sup>1</sup>H NMR (400 MHz, CDCl<sub>3</sub>) δ 8.18 (s, 1H), 7.51 – 7.31 (m, 7H), 7.31 – 7.21 (m, 4H), 6.97 (d, *J* = 2.1 Hz, 2H), 6.61 (d, *J* = 1.9 Hz, 1H), 5.99 (s, 1H), 5.80 (d, *J* = 5.0 Hz, 1H), 5.16 (s, 1H), 5.08 (s, 1H), 4.70 – 4.56 (m, 1H), 3.86 (s, 6H), 3.11 (m, 3H), 1.37 (dd, *J* = 14.2, 7.1 Hz, 1H), 1.29 – 1.22 (m, 2H), 1.20 (d, *J* = 6.3 Hz, 3H), 0.73 (m, 6H). <sup>13</sup>C NMR (101 MHz, CDCl<sub>3</sub>) δ 171.8, 165.8, 161.1, 142.8, 142.1, 137.9, 136.7, 128.7, 128.6, 128.5, 127.7, 126.4, 125.0, 104.9, 103.7, 87.2, 84.1, 66.1, 55.7, 47.2, 42.0, 28.5, 22.5, 20.7, 11.5, 8.0. [α]<sub>D</sub><sup>25</sup> = -111.80 (c 1.0, CHCl<sub>3</sub>). IR: ν = 3006, 2989, 1650, 1595 cm<sup>-1</sup>. HRMS: *m/z* (ESI) calculated for C<sub>34</sub>H<sub>41</sub>N<sub>2</sub>O<sub>5</sub><sup>+</sup>: 557.3010, found: 557.3003 [M+H]<sup>+</sup>. HPLC: Chiralpak IA column, 90:10 hexanes/isopropanol, 1 ml/min; t<sub>R</sub> = 4.6 min (major), 5.5 min (minor); 92% ee.

*N*-((1*S*,4*R*,6*R*,10*bR*)-1-ethyl-5-iodo-4-methyl-2-oxo-6-phenyl-1,4,6,10*b*-tetrahydro-2*H*-benzo[*f*]isochromen-1-yl)-3,5-dimethoxybenzamide (**12a**)

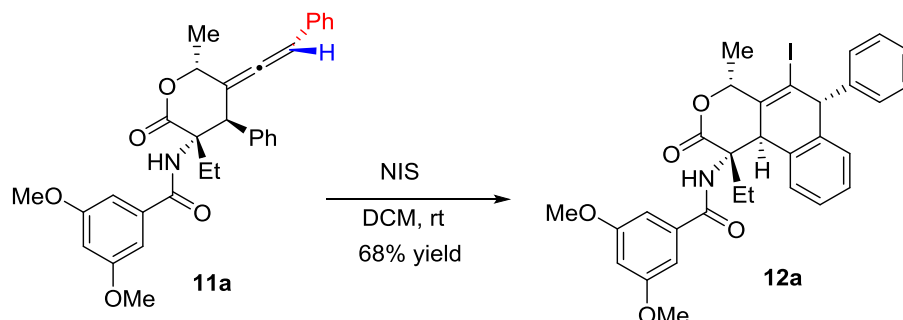

To a solution of **11a** (50 mg, 0.1 mmol) in DCM (1.5 mL) was added NIS (33 mg, 0.15 mmol) at rt. After stirring overnight, the reaction mixture was concentrated under vacuum to give a residue, which was purified with flash column chromatography (PE:EA, 10:1) to give the product **12a** (42 mg, 68% yield). <sup>1</sup>H NMR (400 MHz, CDCl<sub>3</sub>) δ 7.36 – 7.25 (m, 3H), 7.19 – 7.07 (m, 3H), 7.00 (dd, *J* = 8.7, 4.6 Hz, 4H), 6.91 – 6.83 (m, 1H), 6.66 (d, *J* = 1.9 Hz, 1H), 6.31 (s, 1H), 5.64 (q, *J* = 6.5 Hz, 1H), 5.42 (d, *J* = 3.9 Hz, 1H), 5.01 (d, *J* = 3.8 Hz, 1H), 3.85 (s, 6H), 1.90 – 1.72 (m, 4H), 1.31 (dd, *J* = 14.8, 7.5 Hz, 1H), 0.91 (t, *J* = 7.5 Hz, 3H). <sup>13</sup>C NMR (101 MHz, CDCl<sub>3</sub>) δ 169.2, 167.7, 161.2, 146.2, 138.3, 135.9, 135.4, 130.3, 129.4, 129.1, 128.8, 128.6, 127.9, 127.4, 126.7, 106.7, 105.2, 104.3, 85.7, 64.3, 57.0, 55.8, 40.0, 25.2, 20.3, 8.0. [α]<sub>D</sub><sup>25</sup> = -15.70 (c 1.0, CHCl<sub>3</sub>). IR: ν = 3359, 3004, 2963, 2924, 2850, 2048, 1731, 1643, 1589, 1530 cm<sup>-1</sup>. HRMS: *m/z* (ESI) calculated for C<sub>31</sub>H<sub>31</sub>INO<sub>5</sub><sup>+</sup>: 624.1241, found: 624.1233

[M+H]<sup>+</sup>. HPLC: Chiralpak IA column, 90:10 hexanes/isopropanol, 1 ml/min; t<sub>R</sub> = 9.2 min (minor), 10.7 min (major); 91% ee.

*N*-((3*S*,4*S*,6*S*)-3-ethyl-6-methyl-2-oxo-4-phenyl-5-((*S*)-2-phenylvinylidene)tetrahydro-2*H*-pyran-3-yl)-3,5-dimethoxybenzamide (**13a**)

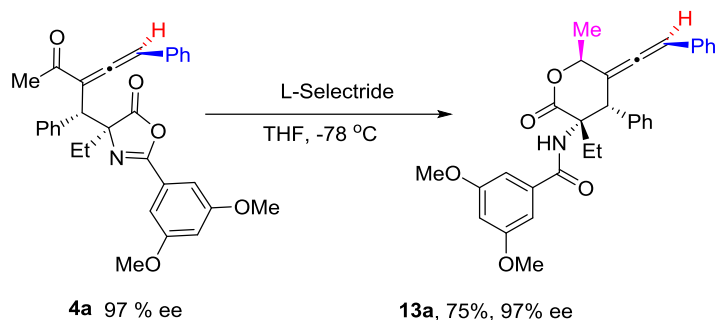

To a solution of **4a** (532mg 1.07mmol) in THF (4mL) was added L-Selectride (1.0 M, 1.8mL, 0.25 mmol) at -78°C. After consumption of the starting material by TLC monitoring, the reaction was quenched by H<sub>2</sub>O and then extracted with EA for 3 times. The combined organic layers were dried over Na<sub>2</sub>SO<sub>4</sub> and concentrated under vacuum to give a residue, which was purified with flash column chromatography (PE:EA, 4:1) to give the product **13a** (400mg, 75% yield). <sup>1</sup>H NMR (500 MHz, CDCl<sub>3</sub>) δ 7.38 (t, *J* = 7.4 Hz, 2H), 7.30 (t, *J* = 8.3 Hz, 3H), 7.20 (dt, *J* = 15.8, 7.5 Hz, 5H), 6.83 (d, *J* = 2.1 Hz, 2H), 6.59 (d, *J* = 2.0 Hz, 1H), 6.33 (t, *J* = 4.0 Hz, 1H), 6.02 (s, 1H), 5.50 (dd, *J* = 5.7, 4.2 Hz, 1H), 4.95 (d, *J* = 4.1 Hz, 1H), 3.81 (s, 6H), 2.13 (dd, *J* = 14.3, 7.4 Hz, 1H), 1.76 (dd, *J* = 14.4, 7.4 Hz, 1H), 1.59 (d, *J* = 6.3 Hz, 3H), 1.10 (t, *J* = 7.5 Hz, 3H). <sup>13</sup>C NMR (126 MHz, CDCl<sub>3</sub>) δ 201.9, 169.6, 167.5, 161.1, 135.9, 135.7, 133.4, 130.8, 129.2, 128.0, 128.0, 128.0, 127.0, 106.4, 105.1, 104.1, 101.2, 76.4, 62.5, 55.8, 49.2, 27.3, 19.6, 8.7. [α]<sub>D</sub><sup>25</sup> = -276.00 (c 1.0, CHCl<sub>3</sub>). IR: ν = 3006, 2989, 2032, 1743, 1664, 1595 cm<sup>-1</sup>. HRMS: *m/z* (ESI) calculated for C<sub>31</sub>H<sub>32</sub>NO<sub>5</sub><sup>+</sup>: 498.2275, found: 498.2265 [M+H]<sup>+</sup>. HPLC: Chiralpak IA column, 80:20 hexanes/isopropanol, 1 ml/min; t<sub>R</sub> = 8.2 min (minor), 9.8 min (major); 97% ee.

*N*-((3*S*,4*R*,6*S*)-5-((*S*)-1-hydroxyethyl)-4,7-diphenyl-3-(propylcarbamoyl)hepta-5,6-dien-3-yl)-3,5-dimethoxybenzamide (**14a**)

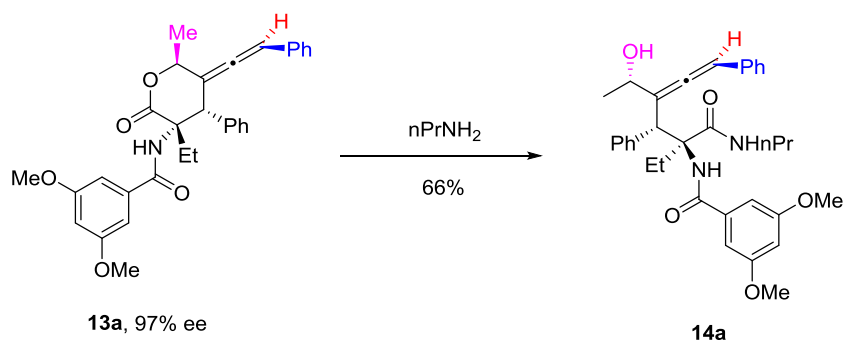

To a flask containing **13a** (50 mg, 0.1 mmol) was added nPrNH<sub>2</sub> (0.5 mL) at rt. After stirring for 36 h, the reaction mixture was concentrated under vacuum to give a residue, which was purified with flash column chromatography (DCM) to give the product **14a** (37 mg, 66% yield). <sup>1</sup>H NMR (500 MHz, CDCl<sub>3</sub>) δ 8.25 (s, 1H), 7.58 (d, *J* = 7.1 Hz, 2H), 7.39 (dt, *J* = 21.8, 7.1 Hz, 3H), 7.14 (d, *J* = 7.1 Hz, 2H), 7.10 (t, *J* = 7.3 Hz, 1H), 7.02 (t, *J* = 7.5 Hz, 2H), 6.94 (d, *J* = 2.2 Hz, 2H), 6.63 (t, *J* = 2.2 Hz, 1H), 6.46 (s, 1H), 5.31 (s, 1H), 4.98 (t, *J* = 5.2 Hz, 1H), 4.11 – 4.02 (m, 1H), 3.81 (s, 6H), 3.08 – 2.88 (m, 3H), 1.51 (dd, *J* = 14.0, 7.1 Hz, 1H), 1.36 (ddd, *J* = 17.1, 14.1, 6.7 Hz, 2H), 1.14 (d, *J* = 6.3 Hz, 3H), 0.79 (t, *J* = 7.4 Hz, 3H), 0.68 (t, *J* = 7.3 Hz, 3H). <sup>13</sup>C NMR (126 MHz, CDCl<sub>3</sub>) δ 202.3, 170.3, 166.3, 161.1, 138.3, 137.2, 134.2, 131.6, 128.6, 128.6, 128.4, 127.3, 127.2, 111.8, 104.9, 104.5, 101.0, 68.9, 66.8, 55.7, 50.7, 41.9, 28.9, 22.4, 21.8, 11.6, 8.1. [α]<sub>D</sub><sup>25</sup> = -178.80.

3,5-dimethoxy-*N*-((1*R*,2*S*)-1-((2*S*,5*R*)-2-methyl-5-phenyl-2,5-dihydrofuran-3-yl)-1-phenyl-2-(propylcarbamoyl)butan-2-yl)benzamide (**15a**)

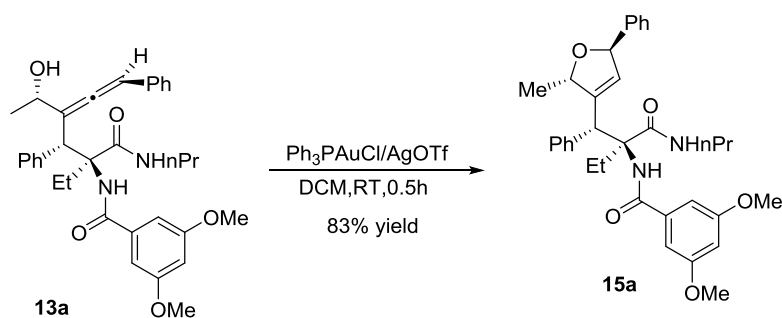

To a solution of **13a** (30 mg, 0.053 mmol) in DCM (1 mL) was added a solution of PPh<sub>3</sub>AuOTf in DCM (0.005 mmol, in situ prepared by mixing PPh<sub>3</sub>AuCl and AgOTf in DCM) at rt. After stirring for 0.5 h, the reaction mixture was purified by preparative TLC (PE:EA, 3:1) to give product **15a** (25 mg, 83% yield). <sup>1</sup>H NMR (500 MHz, CDCl<sub>3</sub>) δ 8.20 (s, 1H), 7.52 (d, *J* = 7.0 Hz, 2H), 7.44 – 7.32 (m, 3H), 7.13 (t, *J* = 7.1 Hz, 1H), 7.08 (d, *J* = 7.0 Hz, 2H), 7.01 (t, *J* = 7.2 Hz, 2H), 6.94 (s, 2H), 6.62 (s, 1H),



5.89 (s, 1H), 5.80 (d,  $J = 4.8$  Hz, 1H), 5.17 (s, 1H), 4.97 (m, 2H), 3.79 (s, 6H), 3.20 (dd,  $J = 13.0$ , 6.5 Hz, 1H), 3.15 – 3.01 (m, 2H), 1.54 (dd,  $J = 14.1$ , 7.1 Hz, 1H), 1.39 (dt,  $J = 14.2$ , 7.0 Hz, 2H), 0.82 (m, 6H), 0.74 (t,  $J = 6.8$  Hz, 3H).  $^{13}\text{C}$  NMR (126 MHz,  $\text{CDCl}_3$ )  $\delta$  171.4, 165.4, 161.1, 142.0, 141.8, 137.1, 137.0, 131.7, 128.4, 128.4, 128.3, 127.8, 126.8, 125.5, 104.7, 104.4, 88.0, 86.1, 66.9, 55.7, 47.6, 42.0, 28.2, 22.5, 20.9, 11.5, 8.2.  $[\alpha]_{\text{D}}^{25} = -41.20$  (c 1.0,  $\text{CHCl}_3$ ). IR:  $\nu = 3006, 2989, 1650, 1595 \text{ cm}^{-1}$ . HRMS:  $m/z$  (ESI) calculated for  $\text{C}_{34}\text{H}_{41}\text{N}_2\text{O}_5^+$ : 557.3010, found: 557.3001  $[\text{M}+\text{H}]^+$ . HPLC: Chiralpak IA column, 90:10 hexanes/isopropanol, 1 ml/min;  $t_{\text{R}} = 4.2\text{min}$  (major), 5.6min (minor); 97% ee.

(1*R*,5*S*,8*S*,9*S*)-3-(3,5-dimethoxyphenyl)-5-ethyl-1-((*Z*)-1-iodo-2-phenylvinyl)-8-methyl-9-phenyl-2,7-dioxo-4-azabicyclo[3.3.1]non-3-en-6-one (**16a**)

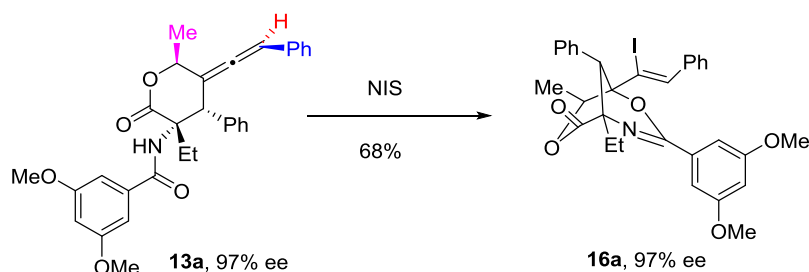

To a solution of **13a** (20 mg, 0.04 mmol) in DCM (0.5 mL) was added NIS (15 mg, 0.067 mmol) at rt. After stirring overnight, the reaction mixture was concentrated under vacuum to give a residue, which was purified preparative TLC (PE:EA, 4:1) to give the product **16a** (17 mg, 68% yield).  $^1\text{H}$  NMR (400 MHz,  $\text{CDCl}_3$ )  $\delta$  7.41 (m, 7H), 7.34 – 7.27 (m, 3H), 7.19 – 7.08 (m, 2H), 6.94 (s, 1H), 6.62 (t,  $J = 2.3$  Hz, 1H), 5.14 (q,  $J = 6.9$  Hz, 1H), 3.85 (s, 6H), 3.57 (s, 1H), 2.34 (dd,  $J = 14.2$ , 7.4 Hz, 1H), 1.75 (d,  $J = 7.0$  Hz, 3H), 1.27 (dd,  $J = 14.3$ , 7.0 Hz, 1H), 0.86 (t,  $J = 7.4$  Hz, 3H).  $^{13}\text{C}$  NMR (101 MHz,  $\text{CDCl}_3$ )  $\delta$  168.9, 160.6, 157.1, 139.9, 138.1, 135.0, 133.7, 129.5, 128.7, 128.4, 128.3, 128.2, 107.9, 105.8, 104.6, 85.2, 81.5, 62.9, 55.7, 50.2, 26.9, 20.5, 6.7.  $[\alpha]_{\text{D}}^{25} = 32.0$  (c 1.0,  $\text{CHCl}_3$ ). IR:  $\nu = 3359, 3056, 2969, 1741, 1647, 1589 \text{ cm}^{-1}$ . HRMS:  $m/z$  (ESI) calculated for  $\text{C}_{31}\text{H}_{31}\text{INO}_5^+$ : 624.1241, found: 624.1234  $[\text{M}+\text{H}]^+$ . HPLC: Chiralpak IA column, 90:10 hexanes/isopropanol, 1 ml/min;  $t_{\text{R}} = 5.3\text{min}$  (major), 13.5 min (minor); 97% ee.

## Computational Studies

### Computational Methods:

All theoretical calculations were performed with the Gaussian 09<sup>11</sup> program. All structures were completely optimized at the M06-2X<sup>12,13</sup>/6-31G(d) level of theory. The single point energies were further estimated using a larger basis set 6-311++G(d,p) for all atoms with the SMD solvation model<sup>14</sup>. All optimized species were verified as either minima or transition structures by the presence of zero or a single imaginary vibrational frequency. Free energies were evaluated at 298K using harmonic vibrational frequencies. Saddle points were connected to minima in the usual way with intrinsic reaction coordinate (IRC) calculations<sup>15,16</sup>. The ee values and dr values were computed based on the Boltzmann distribution<sup>17</sup>. The EDA-NOCV analysis<sup>18,19</sup> was carried out using the ADF (2019.103) program package<sup>20,21</sup> at the B3LYP-D3/TZ2P<sup>22</sup> level. The frozen core approximation was not employed in these computations. The calculated structures were displayed with the CYLview software<sup>23</sup>. Noncovalent interactions (NCI) shown in VMD 1.9.3 program<sup>24</sup> was employed to gain more insights into the important noncovalent interactions that are present in the proton transfer transition states.

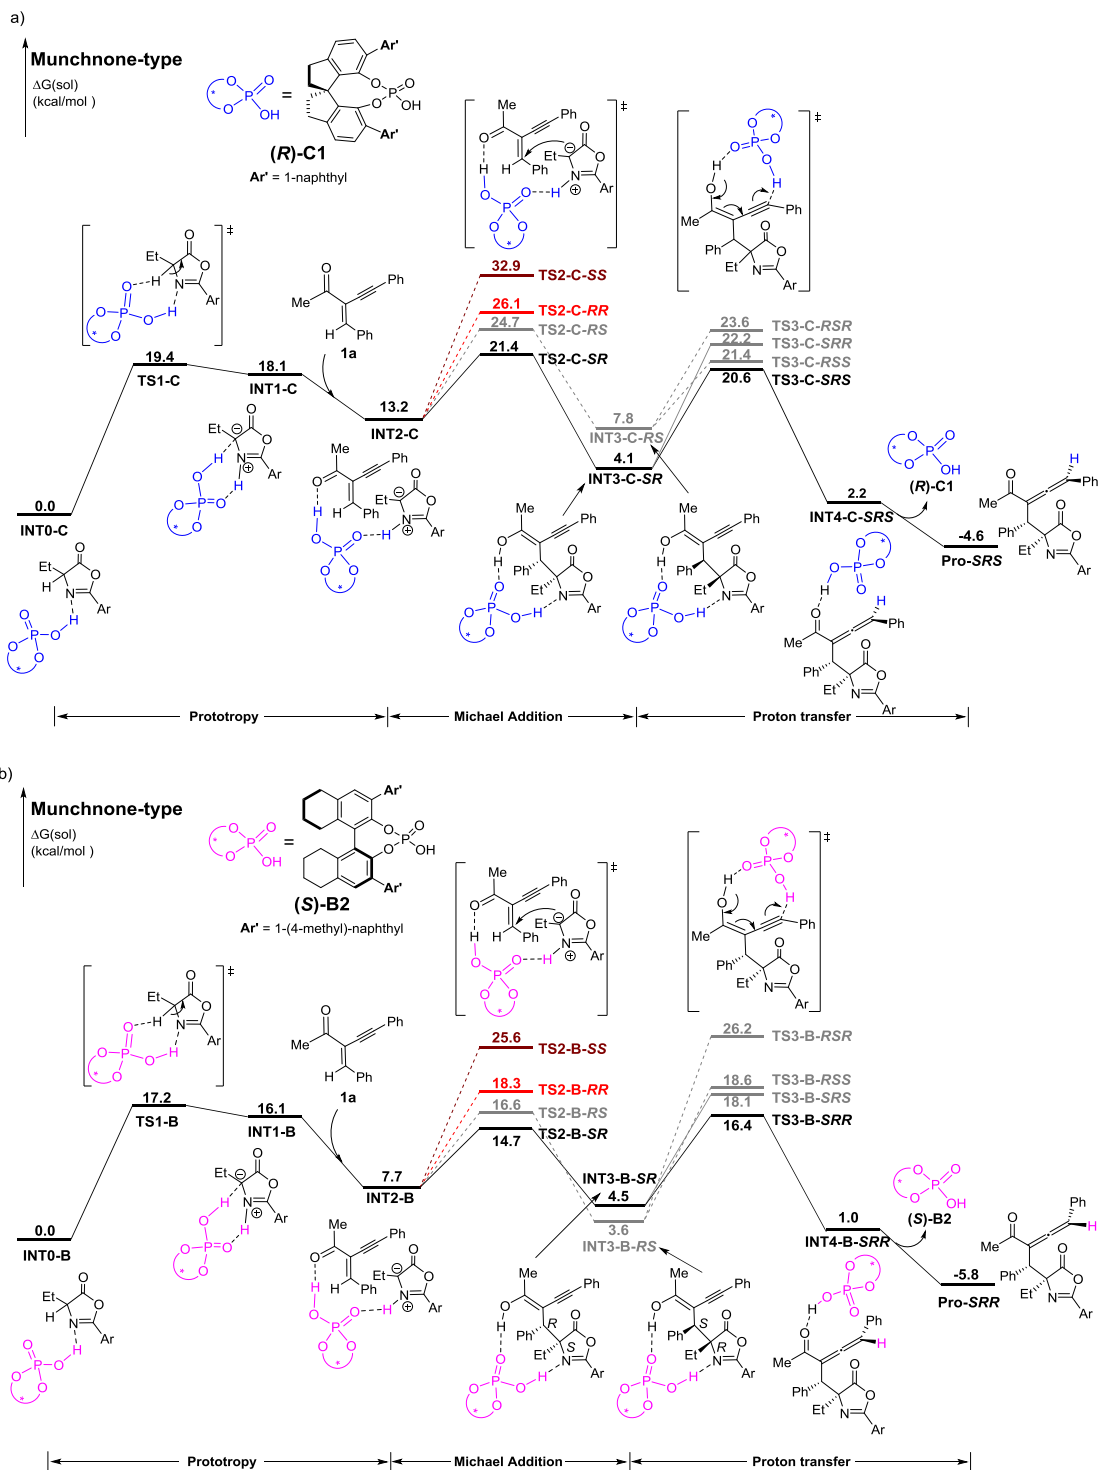

**Supplementary Figure 3. Full reaction pathway computed by DFT based on Münchnone-type catalytic mechanism.**

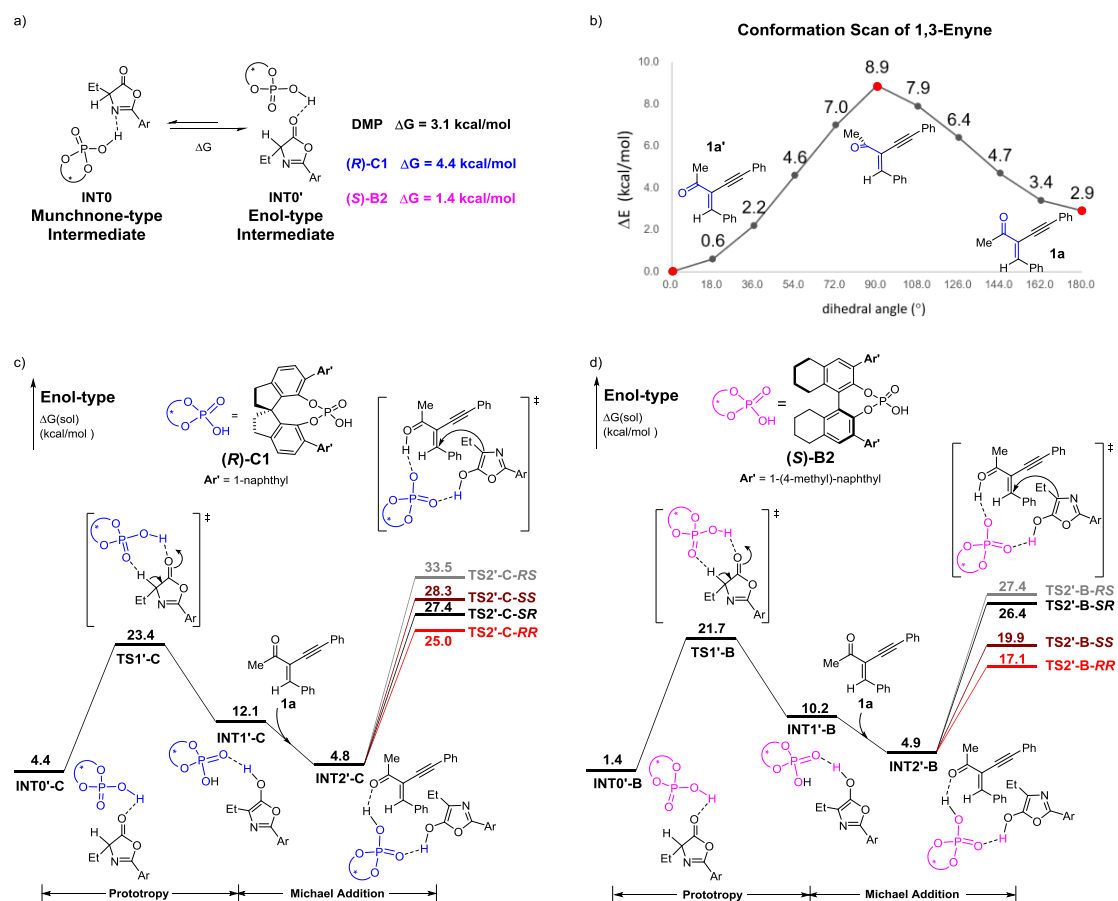

**Supplementary Figure 4.** a) The comparison of intermediates between enol-type and Munchnone-type. b) Conformation scan of the substrate 1,3-enyne. **1a** is 2.9 kcal/mol less stable than **1a'** in electron energy, which would require 6.0 kcal/mol turn over the electron energy barrier to get **1a'**. c) Gibbs free energy profiles for **(R)-C1** catalyzed reaction via enol-type catalytic model. d) Gibbs free energy profiles for **(S)-B2** catalyzed reaction via enol-type catalytic model.

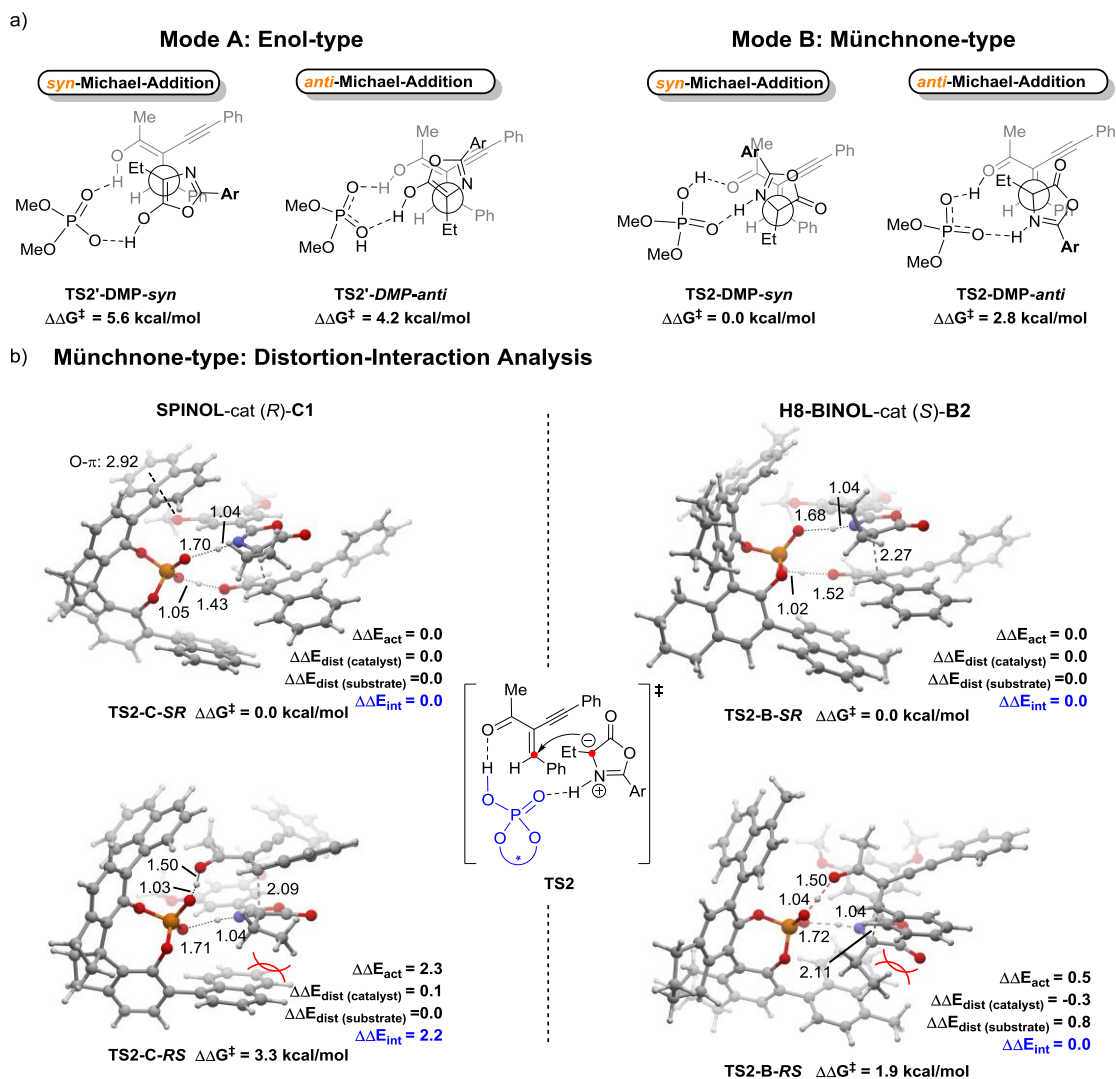

**Supplementary Figure 5.** (a) Comparison of two possible activation modes for Michael addition step based on achiral dimethyl phosphate (DMP) model catalyst. In Enol-type, the *anti*-Michael-addition-TS is 1.4 kcal/mol lower than *syn*-Michael-addition-TS, which was not in agreement with the experimental *syn*-addition observations. In Münchnone-type, the *syn*-Michael-addition-TS is 2.8 kcal/mol more stable than *anti*-Michael-addition-TS, suggesting the correct *syn*-addition outcomes. (b) Distortion-interaction analysis<sup>25-29</sup> of Michael-Addition TS performed at M06-2X/6-311++G(d,p) level of theory in Gaussian 09. For **TS2-C-SR** and **TS2-C-RS**, the distortion-interaction analysis reveals that the major contribution of activation energy ( $\Delta\Delta E_{act}$ ) is from the interaction energies ( $\Delta\Delta E_{int}$ ) between (R)-C1 catalyst fragment and substrate fragment, probably because of the steric repulsion between 3,3'-substituent of C1 catalyst and the ethyl group of **2a** in **TS2-C-RS**, which indicates that the (R)-C1 catalyst can differentiate the substrates with different configurations via interactions between catalyst and substrate in Michael addition transition states. In contrast, the distortion-interaction analysis of **TS2-B-SR** and **TS2-B-RS** shows that (S)-B2 catalyst cannot easily distinguish the different configurations in Michael addition transition states by interacting with substrates. Furthermore, the substrate distortion destabilizing **TS2-B-RS** comes mainly from sterically repulsive interactions between the phenyl group ( $R^2$ ) at the beta position of **1a** and the ethyl group of **2a**. And these delicate differences of transition states for stereoselectivity may originate from the flexible conformation of the two catalysts.

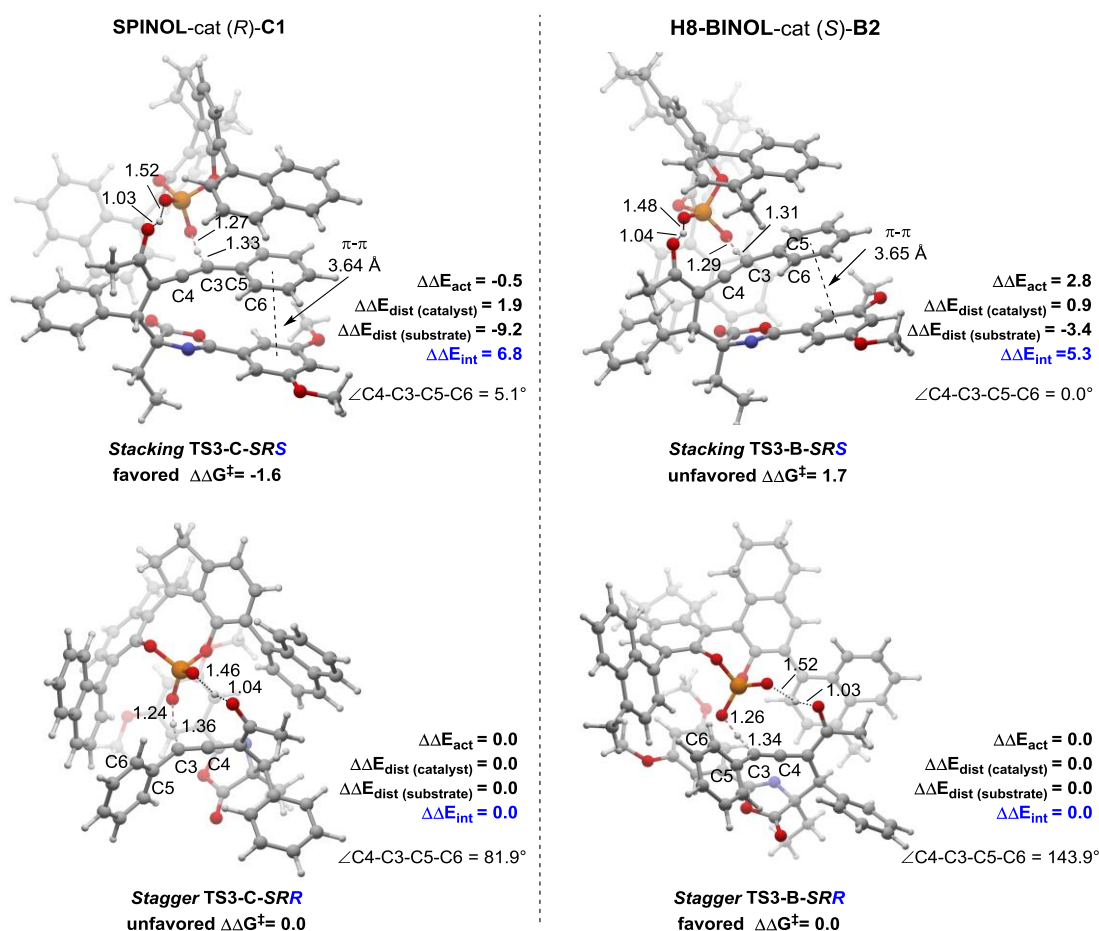

**Supplementary Figure 6.** Distortion-interaction analysis of TSs for proton transfer performed at M06-2X/6-311++G(d,p) level of theory in Gaussian 09. For both the catalysts (*R*)-SPINOL-C1 and (*S*)-H8-BINOL-B2, the distortion-interaction analysis reveals that the interactions between catalyst fragment and substrate fragment are more favorable in *stagger*-type TSs. And the distortion energies of substrate fragment are lower in *stacking*-type TSs, which indicate that the substrate intermediate has strong intramolecular interactions. In addition, focusing on the direction of the phenyl group at the R<sup>1</sup> position of  $\alpha$ -alkynyl enones **1a**, the dihedral angles  $\angle C4-C3-C5-C6$  of phenyl group (R<sup>1</sup>) and the allenic moiety in *stacking*-type TSs, which are closer to planar than that in *stagger*-type TSs. The coplanarity of the dihedral angle results in the resonance stabilization between the phenyl group (R<sup>1</sup>) and the allenic moiety, which also decreases the distortion energy of substrate fragment in *stacking*-type TSs.

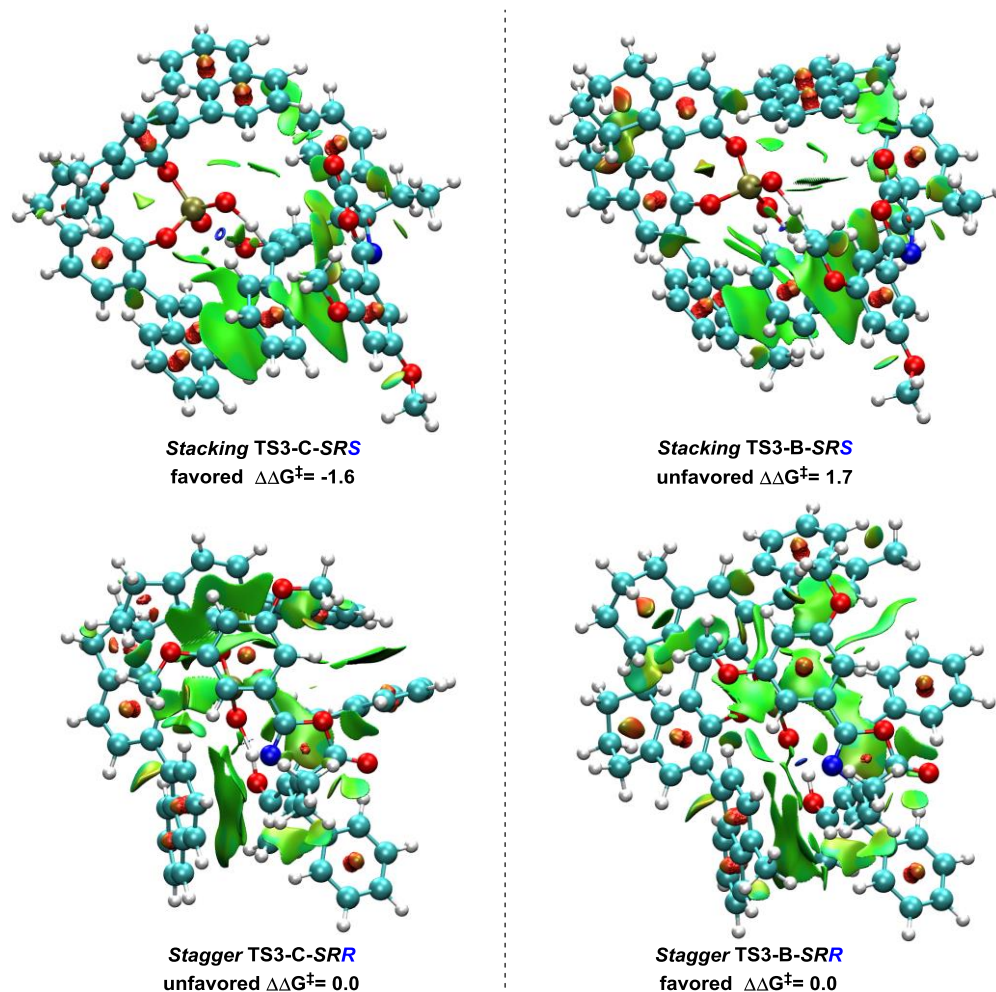

**Supplementary Figure 7.** NCIs analysis of transition state for proton transfer (green, dispersion effect; red, steric effect). There is weak  $\pi$ - $\pi$  stacking between allenic moiety (include phenyl group) of **1a** and oxazolone moiety (include Ar group) of **2a** in *stacking*-type TSs. And, there are clear dispersion effect between the naphthyl or 1-(4-Me)-naphthyl group of the catalysts and acetyl group of **1a**, as well as between spiro-ring or bi-naphthyl moiety of catalyst and 3,5-(MeO)<sub>2</sub>C<sub>6</sub>H<sub>3</sub> group of **2a** in *stagger*-type TSs. Therefore, the intramolecular interactions mainly exist in *stacking*-type TSs, and intermolecular interactions mainly occur in *stagger*-type TSs.

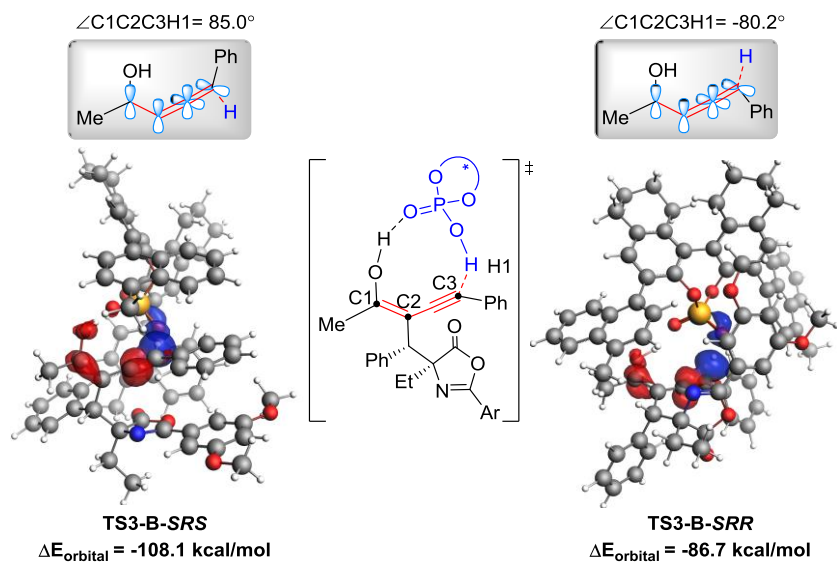

**Supplementary Figure 8.** Orbital interaction in (*S*)-**B2** catalyzed proton transfer transition states.



Supplementary Table 2. Relative activation energies (in kcal/mol) for Michael-addition transition states.

| Transition States     | Conformation | $\Delta E$ | $\Delta H$ | $\Delta G$ | $\Delta\Delta G$ |
|-----------------------|--------------|------------|------------|------------|------------------|
| TS2-DMP- <i>syn</i>   | Conf 1       | 1.4        | 1.1        | 20.2       | 0.0              |
| TS2-DMP- <i>syn</i>   | Conf 2       | 3.6        | 3.3        | 24.0       | 3.8              |
| TS2-DMP- <i>anti</i>  | Conf 1       | 7.1        | 5.6        | 23.0       | 2.8              |
| TS2-DMP- <i>anti</i>  | Conf 2       | 8.0        | 7.1        | 28.7       | 8.5              |
| TS2'-DMP- <i>syn</i>  | Conf 1       | 8.4        | 6.0        | 25.8       | 5.6              |
| TS2'-DMP- <i>syn</i>  | Conf 2       | 9.3        | 9.6        | 26.6       | 6.4              |
| TS2'-DMP- <i>anti</i> | Conf 1       | 5.8        | 3.8        | 24.4       | 4.2              |
| TS2'-DMP- <i>anti</i> | Conf 2       | 7.1        | 5.8        | 26.8       | 6.6              |
| TS2-C- <i>SR</i>      | Conf 1       | 0.6        | 0.7        | 21.4       | 0.0              |
| TS2-C- <i>RS</i>      | Conf 1       | 2.9        | 3.4        | 24.7       | 3.3              |
| TS2-C- <i>RR</i>      | Conf 1       | 8.7        | 8.1        | 26.1       | 4.7              |
| TS2-C- <i>SS</i>      | Conf 2       | 10.3       | 10.9       | 32.9       | 11.5             |
| TS2'-C- <i>SR</i>     | Conf 1       | 8.5        | 6.6        | 27.4       | 6.0              |
| TS2'-C- <i>SR</i>     | Conf 2       | 11.6       | 11.9       | 30.1       | 8.7              |
| TS2'-C- <i>RS</i>     | Conf 2       | 14.4       | 15.0       | 33.5       | 12.1             |
| TS2'-C- <i>RR</i>     | Conf 1       | 7.8        | 6.2        | 25.0       | 3.6              |
| TS2'-C- <i>RR</i>     | Conf 2       | 7.9        | 6.6        | 26.8       | 5.4              |
| TS2'-C- <i>SS</i>     | Conf 1       | 11.5       | 9.2        | 28.2       | 6.8              |
| TS2-B- <i>SR</i>      | Conf 1       | -1.2       | -1.1       | 14.7       | 0.0              |
| TS2-B- <i>RS</i>      | Conf 1       | -2.4       | -2.1       | 16.6       | 1.9              |
| TS2-B- <i>RR</i>      | Conf 1       | 2.6        | 1.5        | 18.3       | 3.6              |
| TS2-B- <i>SS</i>      | Conf 2       | 8.0        | 6.5        | 25.6       | 10.9             |
| TS2'-B- <i>SR</i>     | Conf 1       | 6.5        | 5.4        | 24.8       | 11.1             |
| TS2'-B- <i>SR</i>     | Conf 2       | 7.6        | 7.0        | 26.4       | 11.7             |
| TS2'-B- <i>RS</i>     | Conf 2       | 10.6       | 10.1       | 27.4       | 12.7             |
| TS2'-B- <i>RR</i>     | Conf 1       | 2.6        | -0.6       | 17.1       | 2.4              |
| TS2'-B- <i>RR</i>     | Conf 2       | 6.6        | 4.6        | 26.1       | 11.4             |
| TS2'-B- <i>SS</i>     | Conf 1       | 4.5        | 2.0        | 19.9       | 5.2              |

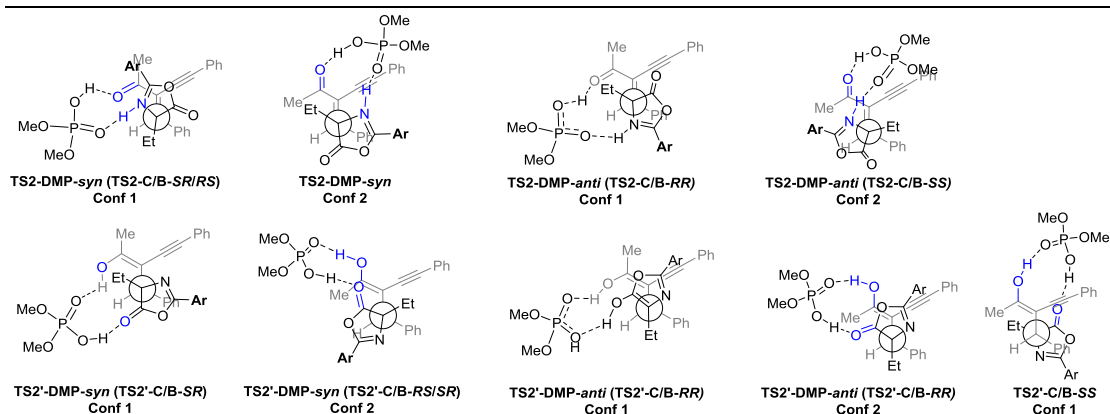

**Supplementary Table 3. Relative activation energies (in kcal/mol) for Proton transfer transition states.**

| Transition States | Mode            | Conformation | $\Delta E$ | $\Delta H$ | $\Delta G$ | $\Delta\Delta G$ |
|-------------------|-----------------|--------------|------------|------------|------------|------------------|
| TS3-C-SRS         | <i>stacking</i> | Conf 1       | 2.4        | 0.6        | 20.6       | 0.0              |
| TS3-C-SRS         | <i>stacking</i> | Conf 2       | 5.9        | 3.5        | 22.8       | 2.2              |
| TS3-C-SRS         | <i>stacking</i> | Conf 3       | 3.4        | 0.8        | 24.0       | 3.4              |
| TS3-C-SRS         | <i>stagger</i>  |              | 10.6       | 9.0        | 28.7       | 8.1              |
| TS3-C-SRR         | <i>stacking</i> |              | 8.9        | 1.9        | 27.2       | 6.4              |
| TS3-C-SRR         | <i>stagger</i>  | Conf 1       | 2.9        | 0.4        | 22.2       | 1.6              |
| TS3-C-SRR         | <i>stagger</i>  | Conf 2       | 4.4        | 2.3        | 24.0       | 3.4              |
| TS3-C-SRR         | <i>stagger</i>  | Conf 3       | 6.0        | 3.7        | 26.0       | 5.4              |
| TS3-C-RSS         | <i>stacking</i> | Conf 1       | 1.4        | -0.6       | 21.4       | 0.8              |
| TS3-C-RSS         | <i>stacking</i> | Conf 2       | 5.6        | 3.5        | 24.9       | 4.3              |
| TS3-C-RSR         | <i>stacking</i> |              | 11.3       | 8.8        | 28.6       | 8.0              |
| TS3-C-RSR         | <i>stagger</i>  | Conf 1       | 7.3        | 4.9        | 23.6       | 3.0              |
| TS3-C-RSR         | <i>stagger</i>  | Conf 2       | 8.4        | 6.1        | 25.5       | 4.9              |
| TS3-B-SRR         | <i>stagger</i>  |              | -3.2       | -5.7       | 16.4       | 0.0              |
| TS3-B-SRR         | <i>stacking</i> |              | 0.8        | -1.9       | 20.5       | 4.1              |
| TS3-B-SRS         | <i>stagger</i>  |              | 8.4        | 6.2        | 24.7       | 8.3              |
| TS3-B-SRS         | <i>stacking</i> |              | -0.4       | -3.0       | 18.1       | 1.7              |
| TS3-B-RSR         | <i>stagger</i>  |              | 8.0        | 5.5        | 26.2       | 9.8              |
| TS3-B-RSS         | <i>stacking</i> | Conf 1       | 0.6        | -2.0       | 18.6       | 2.2              |
| TS3-B-RSS         | <i>stacking</i> | Conf 2       | 2.7        | 0.2        | 24.5       | 8.1              |

**Supplementary Table 4. Relative energy components (in kcal/mol) for proton transfer transition states.**

| TS3       | <sup>a</sup> $\Delta E_{\text{dist(catalyst)}}$ | <sup>a</sup> $\Delta E_{\text{dist(substrate)}}$ | $\Delta E_{\text{pauli}}$ | $\Delta E_{\text{elstat}}$ | $\Delta E_{\text{orbit}}$ | $\Delta E_{\text{disper}}$ |
|-----------|-------------------------------------------------|--------------------------------------------------|---------------------------|----------------------------|---------------------------|----------------------------|
| TS3-C-SRS | -12153.83                                       | -11129.12                                        | 122.90                    | -60.07                     | -102.79                   | -25.81                     |
| TS3-C-SRR | -12155.52                                       | -11117.09                                        | 137.67                    | -69.18                     | -99.69                    | -40.12                     |
| TS3-B-SRS | -14303.33                                       | -11127.28                                        | 123.56                    | -61.03                     | -108.10                   | -25.92                     |
| TS3-B-SRR | -14305.87                                       | -11134.40                                        | 121.76                    | -58.77                     | -86.68                    | -44.39                     |

<sup>a</sup>The  $\Delta E_{\text{dist}}$  values are the absolute energy rather than relative energy respect to free catalyst and substrate, respectively, which is due to TS3-C-SRS and TS3-C-SRR (or TS3-B-SRS and TS3-B-SRR) are stemmed from the same catalyst precursor and reactant precursor.

**Supplementary Table 5. Calculated free energies of activation (in kcal/mol) for proton transfer transition states in stereodivergent synthesis of trisubstituted allenes for substrates with different R<sup>2</sup>/R<sup>3</sup> substituents.**

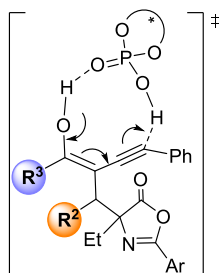

| TS3                  | R <sup>2</sup> | R <sup>3</sup> | exp<br>a.d.r. | exp<br>b $\Delta\Delta G^\ddagger$ | calc<br>b $\Delta\Delta G^\ddagger$ |
|----------------------|----------------|----------------|---------------|------------------------------------|-------------------------------------|
| <b>TS3-B-SRS</b>     | Ph             | Me             | 20:1          | 1.8                                | 1.7                                 |
| <b>TS3-B-SRR</b>     |                |                |               |                                    |                                     |
| <b>TS3-B-SRS-Cy</b>  | Cy             | Me             | 4:1           | 0.8                                | 1.1                                 |
| <b>TS3-B-SRR-Cy</b>  |                |                |               |                                    |                                     |
| <b>TS3-B-SRS-nPr</b> | Ph             | nPr            | 23:1          | 1.9                                | 3.0                                 |
| <b>TS3-B-SRR-nPr</b> |                |                |               |                                    |                                     |
| <b>TS3-C-SRS</b>     | Ph             | Me             | 12:1          | 1.5                                | 1.6                                 |
| <b>TS3-C-SRR</b>     |                |                |               |                                    |                                     |
| <b>TS3-C-SRS-Cy</b>  | Cy             | Me             | 13:1          | 1.5                                | 1.8                                 |
| <b>TS3-C-SRR-Cy</b>  |                |                |               |                                    |                                     |

<sup>a</sup>In **B2** catalysis, the diastereoselective ratio is **3** (major) : **4** (minor), and in **C1** catalysis, the diastereoselective ratio is **4** (major) : **3** (minor). <sup>b</sup>The value  $\Delta\Delta G^\ddagger$  in **TS3-B** is  $\Delta G^\ddagger_{stacking-TS} - \Delta G^\ddagger_{stagger-TS}$ , and the value  $\Delta\Delta G^\ddagger$  in **TS3-C** is  $\Delta G^\ddagger_{stagger-TS} - \Delta G^\ddagger_{stacking-TS}$ .

**Supplementary Table 6. Zero-point correction (ZPE), electronic energies (E), enthalpies (H), and Gibbs free energies (G) (in Hartree) of the structures calculated and imaginary frequency (cm<sup>-1</sup>) of transition state structures at M06-2X-SMD(CCl<sub>4</sub>)/6-311++G(d,p)//M06-2X/6-31G(d) level of theory.**

| Structures | ZPE      | E            | H            | G            | E(solvent)   | Imaginary Frequency |
|------------|----------|--------------|--------------|--------------|--------------|---------------------|
| INT0-C     | 0.823266 | -2927.608666 | -2926.735171 | -2926.869147 | -2928.370527 |                     |
| TS1-C      | 0.819119 | -2927.576159 | -2926.707451 | -2926.83913  | -2928.337059 | -922.8              |
| INT1-C     | 0.822731 | -2927.578324 | -2926.705403 | -2926.83891  | -2928.341561 |                     |
| INT2-C     | 1.091344 | -3696.794219 | -3695.634937 | -3695.807085 | -3697.774740 |                     |
| 1a         | 0.266385 | -769.171047  | -768.887284  | -768.951293  | -769.397331  |                     |
| TS2-C-SR   | 1.091393 | -3696.790825 | -3695.633502 | -3695.798481 | -3697.766825 | -272.9              |
| TS2-C-RS   | 1.236960 | -3696.786793 | -3695.628689 | -3695.792806 | -3697.763172 | -281.8              |
| TS2-C-RR   | 1.089613 | -3696.774652 | -3695.618402 | -3695.787762 | -3697.753935 | -335.2              |
| TS2-C-SS   | 1.092478 | -3696.774727 | -3695.616427 | -3695.779337 | -3697.751491 | -174.0              |
| INT3-C-SR  | 1.093309 | -3696.814608 | -3695.654614 | -3695.824838 | -3697.791873 |                     |
| INT3-C-RS  | 1.093741 | -3696.812526 | -3695.652597 | -3695.819371 | -3697.789234 |                     |
| TS3-C-SRS  | 1.088380 | -3696.786818 | -3695.632452 | -3695.798664 | -3697.76396  | -1088.4             |
| TS3-C-SRR  | 1.087728 | -3696.789153 | -3695.635960 | -3695.799135 | -3697.761473 | -1135.13            |
| TS3-C-RSS  | 1.088584 | -3696.792104 | -3695.638051 | -3695.800975 | -3697.765683 | -992.4              |
| TS3-C-RSR  | 1.087216 | -3696.779216 | -3695.625766 | -3695.794034 | -3697.756204 | -1116.0             |
| INT4-C-SRS | 1.092262 | -3696.820563 | -3695.66111  | -3695.832239 | -3697.793441 |                     |
| Pro-SRS    | 0.538636 | -1628.925385 | -1628.35187  | -1628.4539   | -1629.399975 |                     |
| (R)-C1     | 0.551987 | -2067.866694 | -2067.282573 | -2067.376116 | -2068.378075 |                     |
| INT0-B     | 0.968736 | -3124.091477 | -3123.065468 | -3123.215743 | -3124.905838 |                     |
| TS1-B      | 0.963865 | -3124.058485 | -3123.037873 | -3123.18594  | -3124.875196 | -943.7              |
| INT1-B     | 0.967561 | -3124.061248 | -3123.03641  | -3123.18549  | -3124.880215 |                     |
| INT2-B     | 1.236296 | -3893.292268 | -3891.98165  | -3892.165543 | -3894.322055 |                     |
| 1a'        | 0.266043 | -769.175757  | -768.892233  | -768.957217  | -769.400061  |                     |
| TS2-B-SR   | 1.235676 | -3893.275084 | -3891.965483 | -3892.151416 | -3894.307855 | -169.43             |
| TS2-B-RS   | 1.236960 | -3893.272943 | -3891.962659 | -3892.147163 | -3894.306984 | -281.8              |
| TS2-B-RR   | 1.233970 | -3893.264868 | -3891.956879 | -3892.144335 | -3894.299013 | -123.8              |
| TS2-B-SS   | 1.234070 | -3893.259193 | -3891.951827 | -3892.135571 | -3894.290436 | -257.9              |
| INT3-B-SR  | 1.236688 | -3893.286929 | -3891.976757 | -3892.16175  | -3894.319212 |                     |
| INT3-B-RS  | 1.237321 | -3893.295963 | -3891.985086 | -3892.169738 | -3894.328224 |                     |
| TS3-B-SRS  | 1.232971 | -3893.271667 | -3891.965958 | -3892.146600 | -3894.303838 | -1082.1             |
| TS3-B-SRR  | 1.233276 | -3893.280093 | -3891.974403 | -3892.153367 | -3894.308243 | -1124.8             |
| TS3-B-RSS  | 1.233447 | -3893.276405 | -3891.970769 | -3892.147112 | -3894.302283 | -940.5              |
| TS3-B-RSR  | 1.233066 | -3893.263057 | -3891.95732  | -3892.138667 | -3894.290341 | -1117.7             |
| INT4-B-SRS | 1.238632 | -3893.309706 | -3891.997889 | -3892.179599 | -3894.336276 |                     |
| Pro-SRR    | 0.538851 | -1628.918845 | -1628.344887 | -1628.449496 | -1629.394084 |                     |

|                      |          |              |              |              |              |          |
|----------------------|----------|--------------|--------------|--------------|--------------|----------|
| <b>(S)-B2</b>        | 0.696801 | -2264.351919 | -2263.615994 | -2263.726032 | -2264.918042 |          |
| <b>INT0'-C</b>       | 0.824137 | -2927.600876 | -2926.726461 | -2926.861545 | -2928.363335 |          |
| <b>TS1'-C</b>        | 0.816848 | -2927.564563 | -2926.69829  | -2926.830413 | -2928.327947 | -1183.9  |
| <b>INT1'-C</b>       | 0.823178 | -2927.58376  | -2926.710056 | -2926.845514 | -2928.34991  |          |
| <b>INT2'-C</b>       | 1.090864 | -3696.811269 | -3695.652921 | -3695.824118 | -3697.788045 |          |
| <b>TS2'-C-SR</b>     | 1.088797 | -3696.773212 | -3695.618961 | -3695.783785 | -3697.754381 | -290.2   |
| <b>TS2'-C-RS</b>     | 1.091677 | -3696.764795 | -3695.606584 | -3695.775078 | -3697.744978 | -168.4   |
| <b>TS2'-C-RR</b>     | 1.088312 | -3696.776746 | -3695.621902 | -3695.790025 | -3697.755492 | -291.8   |
| <b>TS2'-C-SS</b>     | 1.087047 | -3696.76742  | -3695.613789 | -3695.781481 | -3697.749506 | -403.8   |
| <b>INT0'-B</b>       | 0.968745 | -3124.082542 | -3123.056204 | -3123.209118 | -3124.901239 |          |
| <b>TS1'-B</b>        | 0.961046 | -3124.045067 | -3123.027658 | -3123.175952 | -3124.864641 | -1193.0  |
| <b>INT1'-B</b>       | 0.968720 | -3124.070756 | -3123.044901 | -3123.193315 | -3124.891154 |          |
| <b>INT2'-B</b>       | 1.236258 | -3893.291137 | -3891.980155 | -3892.167365 | -3894.323521 |          |
| <b>TS2'-B-SR</b>     | 1.234276 | -3893.258265 | -3891.950749 | -3892.133459 | -3894.292875 | -306.0   |
| <b>TS2'-B-RS</b>     | 1.235306 | -3893.25121  | -3891.942235 | -3892.128797 | -3894.286341 | -151.9   |
| <b>TS2'-B-RR</b>     | 1.230771 | -3893.266127 | -3891.961515 | -3892.147505 | -3894.299043 | -596.4   |
| <b>TS2'-B-SS</b>     | 1.232149 | -3893.259819 | -3891.953935 | -3892.139663 | -3894.296068 | -193.3   |
| <b>INT0-DMP</b>      | 0.379822 | -1582.283201 | -1581.875081 | -1581.965287 | -1582.703353 |          |
| <b>INT0'-DMP</b>     | 0.380136 | -1582.280666 | -1581.872481 | -1581.960427 | -1582.698561 |          |
| <b>TS1-DMP</b>       | 0.375008 | -1582.248271 | -1581.845526 | -1581.934545 | -1582.669681 | -864.6   |
| <b>TS1'-DMP</b>      | 0.373266 | -1582.242313 | -1581.842012 | -1581.926747 | -1582.661857 | -1233.0  |
| <b>TS2-DMP-syn</b>   | 0.646975 | -2351.461494 | -2350.770144 | -2350.893914 | -2352.098429 | -247.5   |
| <b>TS2-DMP-anti</b>  | 0.644640 | -2351.450149 | -2350.760567 | -2350.887220 | -2352.089384 | -183.7   |
| <b>TS2'-DMP-syn</b>  | 0.643889 | -2351.448208 | -2350.760088 | -2350.882759 | -2352.087371 | -494.2   |
| <b>TS2'-DMP-anti</b> | 0.644568 | -2351.453477 | -2350.764799 | -2350.886120 | -2352.091450 | -383.8   |
| <b>TS3-C-SRS-Cy</b>  | 1.160028 | -3700.387184 | -3699.160153 | -3699.328509 | -3701.368523 | -1086.37 |
| <b>TS3-C-SRR-Cy</b>  | 1.160177 | -3700.396111 | -3699.169348 | -3699.333853 | -3701.369247 | -1159.78 |
| <b>TS3-B-SRS-Cy</b>  | 1.303682 | -3896.879929 | -3895.502301 | -3895.685681 | -3897.913979 | -969.48  |
| <b>TS3-B-SRR-Cy</b>  | 1.305190 | -3896.885902 | -3895.507205 | -3895.689346 | -3897.91811  | -1103.05 |
| <b>TS3-B-SRS-nPr</b> | 1.289189 | -3971.854218 | -3970.489855 | -3970.677150 | -3972.909461 | -1132.90 |
| <b>TS3-B-SRR-nPr</b> | 1.291208 | -3971.867901 | -3970.501376 | -3970.687044 | -3972.918019 | -1092.16 |

# X-Ray Structures

X-Ray structure of ( $\pm$ )-**3m** (with CCDC number 1971171)

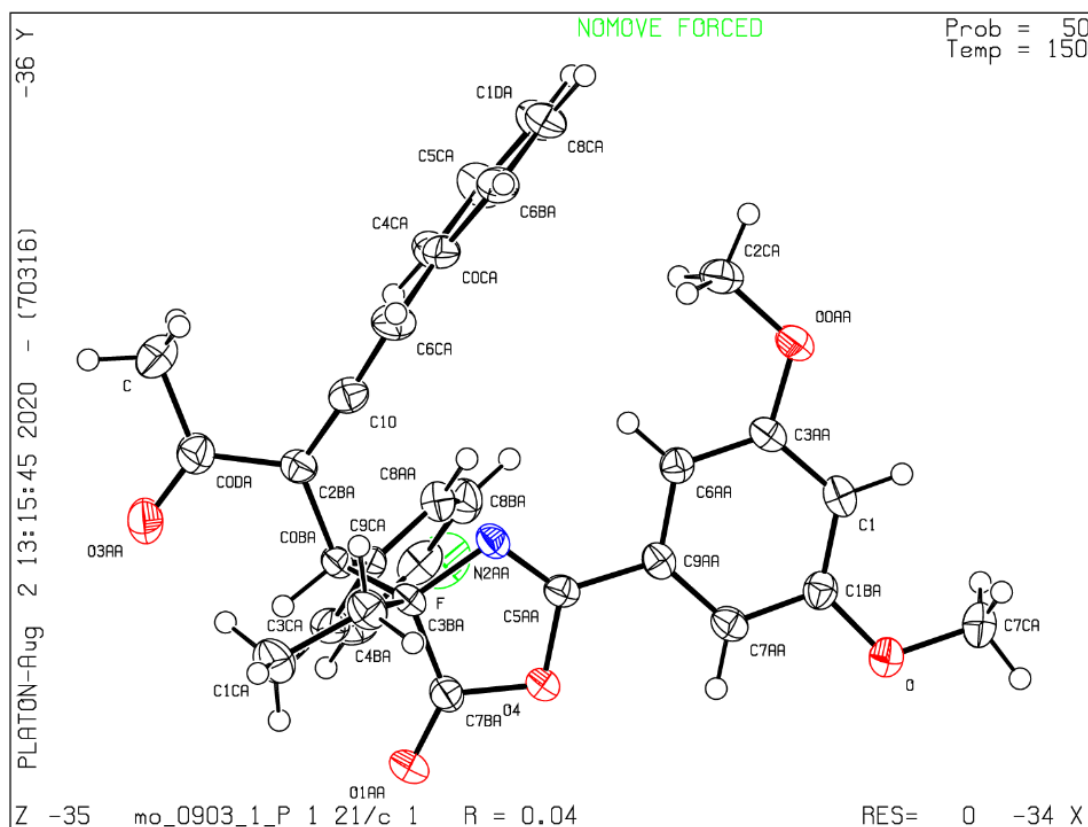

**Supplementary Table 7. Crystal data and structure refinement for****(±)-3m.**

---

| Identification code                         |                                                               |
|---------------------------------------------|---------------------------------------------------------------|
| Empirical formula                           | C <sub>31</sub> H <sub>28</sub> FNO <sub>5</sub>              |
| Formula weight                              | 513.54                                                        |
| Temperature/K                               | 149.99                                                        |
| Crystal system                              | monoclinic                                                    |
| Space group                                 | P2 <sub>1</sub> /c                                            |
| a/Å                                         | 8.9281(5)                                                     |
| b/Å                                         | 8.6663(4)                                                     |
| c/Å                                         | 33.9189(18)                                                   |
| α/°                                         | 90.00                                                         |
| β/°                                         | 91.605(2)                                                     |
| γ/°                                         | 90.00                                                         |
| Volume/Å <sup>3</sup>                       | 2623.4(2)                                                     |
| Z                                           | 4                                                             |
| ρ <sub>calc</sub> /cm <sup>3</sup>          | 1.300                                                         |
| μ/mm <sup>-1</sup>                          | 0.093                                                         |
| F(000)                                      | 1080.0                                                        |
| Crystal size/mm <sup>3</sup>                | 0.2 × 0.1 × 0.1                                               |
| Radiation                                   | MoKα (λ = 0.71073)                                            |
| 2θ range for data collection/°              | 4.56 to 52.04                                                 |
| Index ranges                                | -11 ≤ h ≤ 11, -10 ≤ k ≤ 10, -41 ≤ l ≤ 41                      |
| Reflections collected                       | 33133                                                         |
| Independent reflections                     | 5154 [R <sub>int</sub> = 0.0462, R <sub>sigma</sub> = 0.0326] |
| Data/restraints/parameters                  | 5154/0/347                                                    |
| Goodness-of-fit on F <sup>2</sup>           | 1.048                                                         |
| Final R indexes [I ≥ 2σ (I)]                | R <sub>1</sub> = 0.0449, wR <sub>2</sub> = 0.1001             |
| Final R indexes [all data]                  | R <sub>1</sub> = 0.0704, wR <sub>2</sub> = 0.1128             |
| Largest diff. peak/hole / e Å <sup>-3</sup> | 0.23/-0.23                                                    |

---

X-Ray structure of **4c** (with CCDC number 1971946)

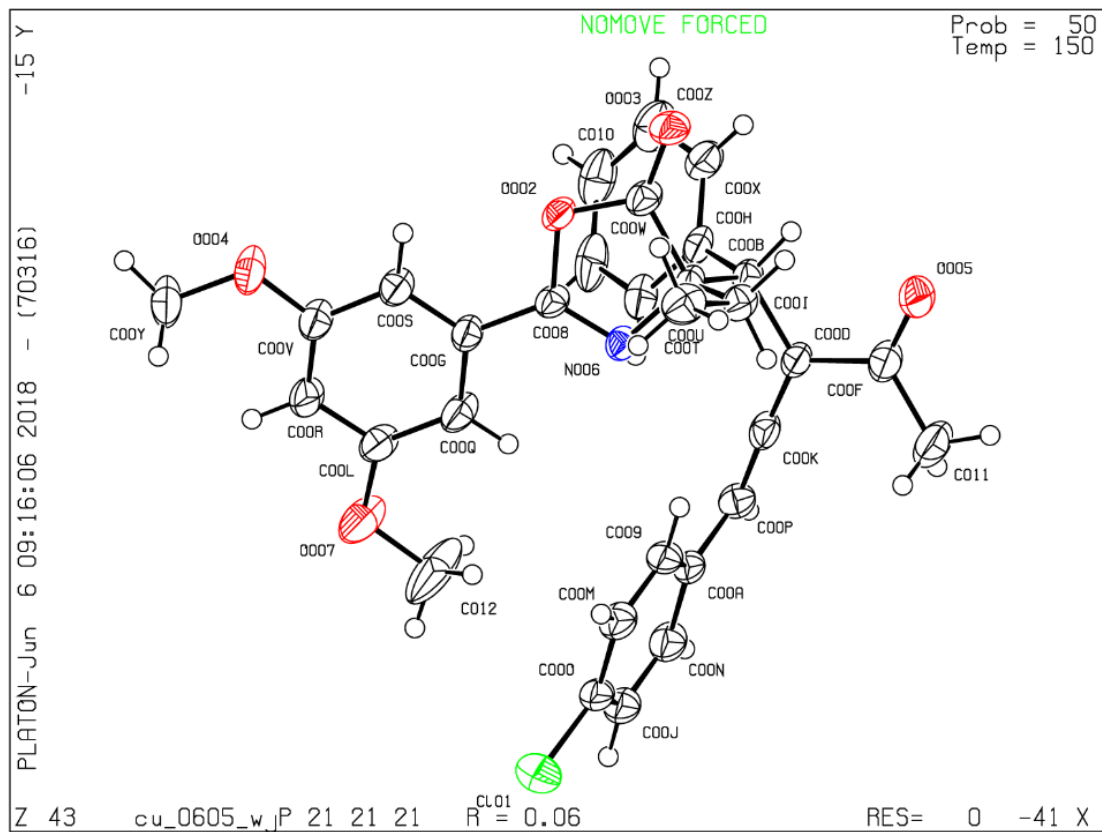



**Supplementary Table 8. Crystal data and structure refinement for 4c.**

| Identification code                         |                                                               |
|---------------------------------------------|---------------------------------------------------------------|
| Empirical formula                           | C <sub>31</sub> H <sub>28</sub> ClNO <sub>5</sub>             |
| Formula weight                              | 529.99                                                        |
| Temperature/K                               | 150.03                                                        |
| Crystal system                              | orthorhombic                                                  |
| Space group                                 | P2 <sub>1</sub> 2 <sub>1</sub> 2 <sub>1</sub>                 |
| a/Å                                         | 16.4628(6)                                                    |
| b/Å                                         | 19.0905(6)                                                    |
| c/Å                                         | 8.8358(3)                                                     |
| α/°                                         | 90.00                                                         |
| β/°                                         | 90.00                                                         |
| γ/°                                         | 90.00                                                         |
| Volume/Å <sup>3</sup>                       | 2776.94(16)                                                   |
| Z                                           | 4                                                             |
| ρ <sub>calc</sub> /cm <sup>3</sup>          | 1.268                                                         |
| μ/mm <sup>-1</sup>                          | 1.547                                                         |
| F(000)                                      | 1112.0                                                        |
| Crystal size/mm <sup>3</sup>                | 0.01 × 0.01 × 0.01                                            |
| Radiation                                   | CuKα (λ = 1.54178)                                            |
| 2θ range for data collection/°              | 7.1 to 148.98                                                 |
| Index ranges                                | -20 ≤ h ≤ 20, -23 ≤ k ≤ 23, -10 ≤ l ≤ 10                      |
| Reflections collected                       | 26413                                                         |
| Independent reflections                     | 5430 [R <sub>int</sub> = 0.0999, R <sub>sigma</sub> = 0.0596] |
| Data/restraints/parameters                  | 5430/0/357                                                    |
| Goodness-of-fit on F <sup>2</sup>           | 1.135                                                         |
| Final R indexes [I >= 2σ (I)]               | R <sub>1</sub> = 0.0551, wR <sub>2</sub> = 0.1079             |
| Final R indexes [all data]                  | R <sub>1</sub> = 0.0761, wR <sub>2</sub> = 0.1175             |
| Largest diff. peak/hole / e Å <sup>-3</sup> | 0.23/-0.29                                                    |
| Flack parameter                             | 0.07(2)                                                       |

X-Ray structure of **11a** (with CCDC number 1971947)

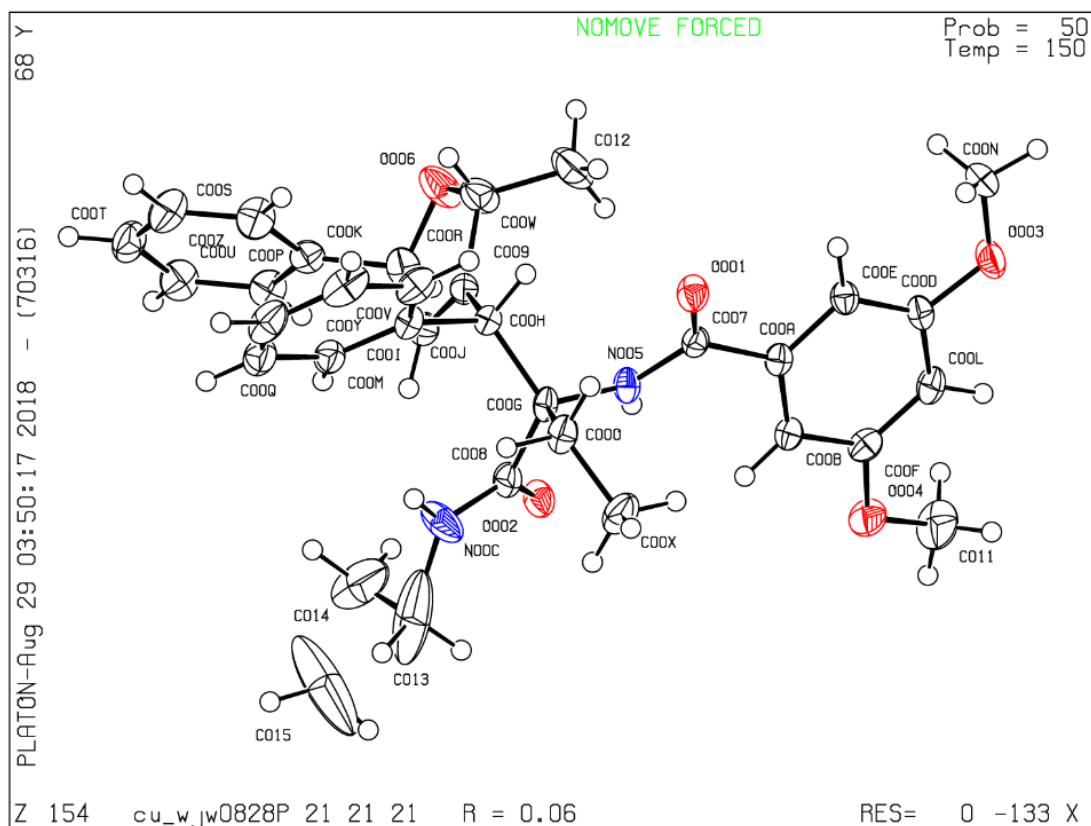

**Supplementary Table 9. Crystal data and structure refinement for 11a.**

| Identification code                         |                                                               |
|---------------------------------------------|---------------------------------------------------------------|
| Empirical formula                           | C <sub>34</sub> H <sub>40</sub> N <sub>2</sub> O <sub>5</sub> |
| Formula weight                              | 556.68                                                        |
| Temperature/K                               | 150.0                                                         |
| Crystal system                              | orthorhombic                                                  |
| Space group                                 | P2 <sub>1</sub> 2 <sub>1</sub> 2 <sub>1</sub>                 |
| a/Å                                         | 10.4433(3)                                                    |
| b/Å                                         | 11.8284(3)                                                    |
| c/Å                                         | 24.0925(7)                                                    |
| α/°                                         | 90                                                            |
| β/°                                         | 90                                                            |
| γ/°                                         | 90                                                            |
| Volume/Å <sup>3</sup>                       | 2976.09(14)                                                   |
| Z                                           | 4                                                             |
| ρ <sub>calc</sub> /g/cm <sup>3</sup>        | 1.242                                                         |
| μ/mm <sup>-1</sup>                          | 0.665                                                         |
| F(000)                                      | 1192.0                                                        |
| Crystal size/mm <sup>3</sup>                | 0.35 × 0.1 × 0.1                                              |
| Radiation                                   | CuKα (λ = 1.54178)                                            |
| 2θ range for data collection/°              | 7.338 to 133.166                                              |
| Index ranges                                | -12 ≤ h ≤ 12, -14 ≤ k ≤ 13, -28 ≤ l ≤ 28                      |
| Reflections collected                       | 34835                                                         |
| Independent reflections                     | 5248 [R <sub>int</sub> = 0.0496, R <sub>sigma</sub> = 0.0319] |
| Data/restraints/parameters                  | 5248/38/386                                                   |
| Goodness-of-fit on F <sup>2</sup>           | 1.032                                                         |
| Final R indexes [I ≥ 2σ (I)]                | R <sub>1</sub> = 0.0469, wR <sub>2</sub> = 0.1184             |
| Final R indexes [all data]                  | R <sub>1</sub> = 0.0495, wR <sub>2</sub> = 0.1205             |
| Largest diff. peak/hole / e Å <sup>-3</sup> | 0.79/-0.63                                                    |
| Flack parameter                             | 0.08(7)                                                       |

X-Ray structure of **12a** (with CCDC number 1971365)

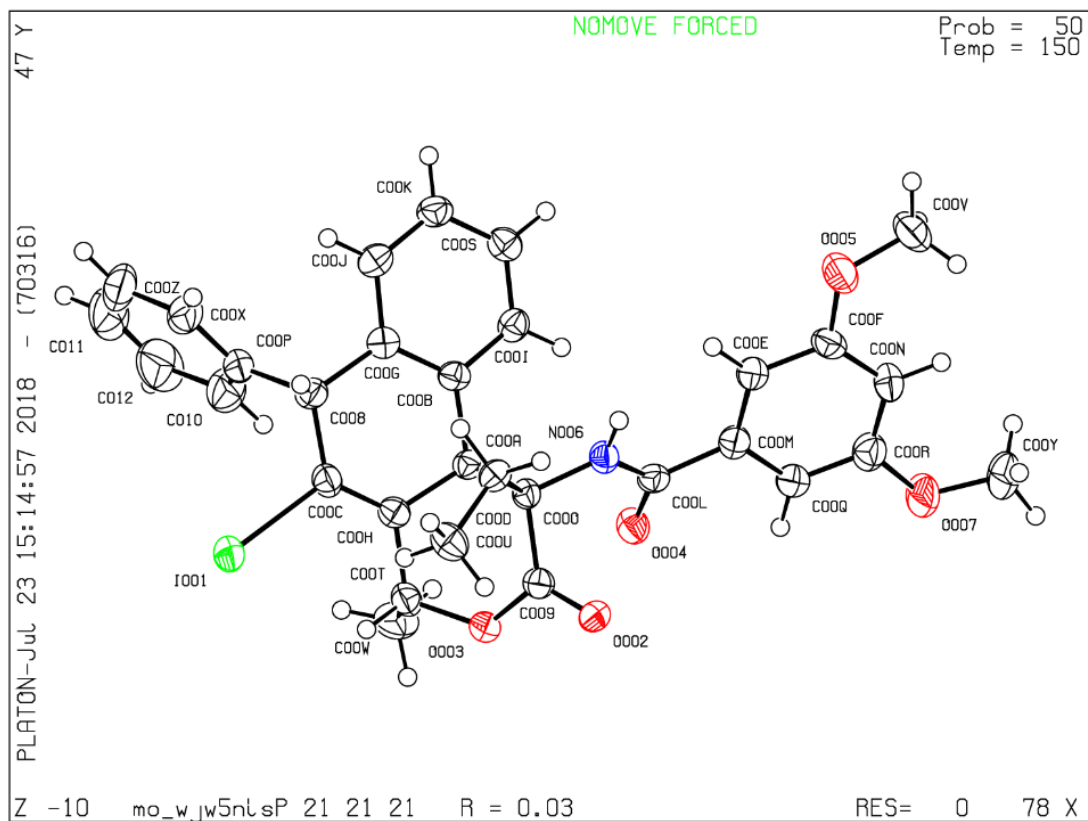

**Supplementary Table 10. Crystal data and structure refinement for 12a.**

| Identification code                         |                                                               |
|---------------------------------------------|---------------------------------------------------------------|
| Empirical formula                           | C <sub>31</sub> H <sub>30</sub> INO <sub>5</sub>              |
| Formula weight                              | 623.46                                                        |
| Temperature/K                               | 149.96                                                        |
| Crystal system                              | orthorhombic                                                  |
| Space group                                 | P2 <sub>1</sub> 2 <sub>1</sub> 2 <sub>1</sub>                 |
| a/Å                                         | 17.1360(10)                                                   |
| b/Å                                         | 16.5257(9)                                                    |
| c/Å                                         | 9.6866(6)                                                     |
| α/°                                         | 90                                                            |
| β/°                                         | 90                                                            |
| γ/°                                         | 90                                                            |
| Volume/Å <sup>3</sup>                       | 2743.1(3)                                                     |
| Z                                           | 4                                                             |
| ρ <sub>calc</sub> /cm <sup>3</sup>          | 1.510                                                         |
| μ/mm <sup>-1</sup>                          | 1.208                                                         |
| F(000)                                      | 1264.0                                                        |
| Crystal size/mm <sup>3</sup>                | 0.4 × 0.2 × 0.2                                               |
| Radiation                                   | MoKα (λ = 0.71073)                                            |
| 2θ range for data collection/°              | 4.754 to 52.864                                               |
| Index ranges                                | -21 ≤ h ≤ 21, -20 ≤ k ≤ 20, -12 ≤ l ≤ 12                      |
| Reflections collected                       | 34341                                                         |
| Independent reflections                     | 5636 [R <sub>int</sub> = 0.0553, R <sub>sigma</sub> = 0.0364] |
| Data/restraints/parameters                  | 5636/0/347                                                    |
| Goodness-of-fit on F <sup>2</sup>           | 1.013                                                         |
| Final R indexes [I ≥ 2σ (I)]                | R <sub>1</sub> = 0.0317, wR <sub>2</sub> = 0.0621             |
| Final R indexes [all data]                  | R <sub>1</sub> = 0.0432, wR <sub>2</sub> = 0.0668             |
| Largest diff. peak/hole / e Å <sup>-3</sup> | 0.76/-0.41                                                    |
| Flack parameter                             | -0.037(11)                                                    |

X-Ray structure of (±)-**16a** (with CCDC number 1971366)

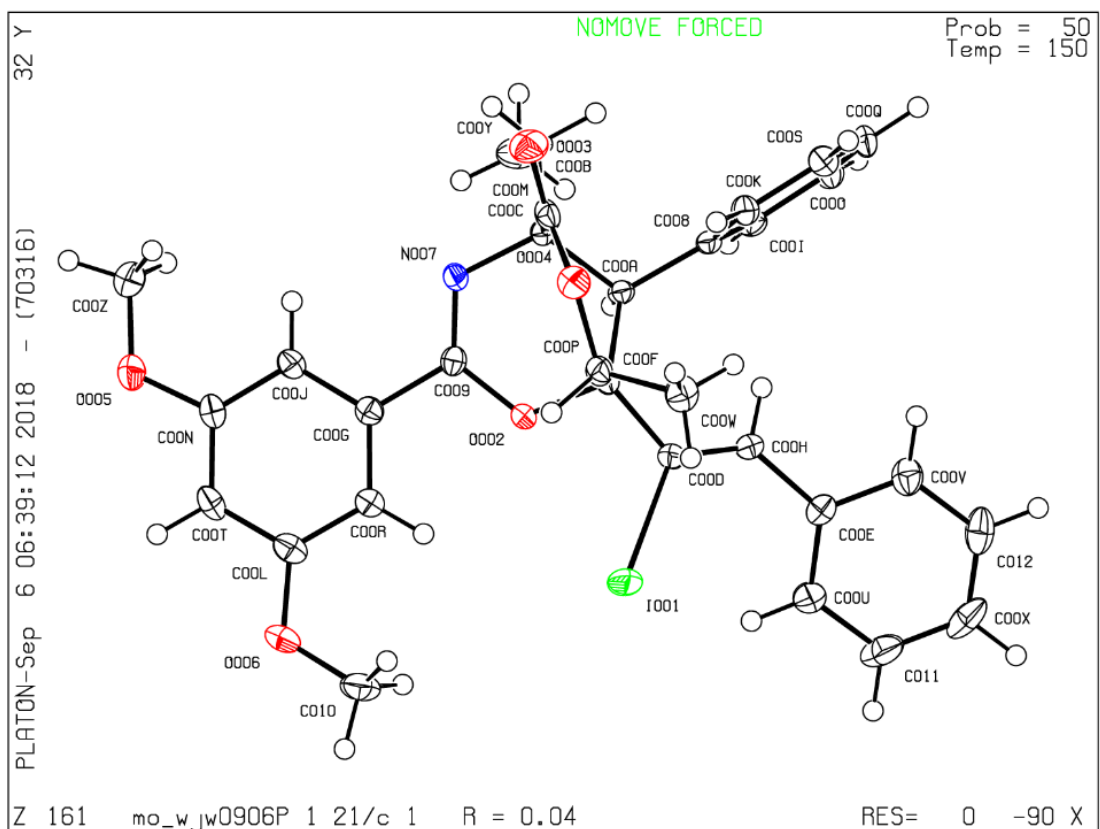

**Supplementary Table 11. Crystal data and structure refinement for 16a.**

| Identification code                         |                                                               |
|---------------------------------------------|---------------------------------------------------------------|
| Empirical formula                           | C <sub>31</sub> H <sub>30</sub> INO <sub>5</sub>              |
| Formula weight                              | 623.46                                                        |
| Temperature/K                               | 150.0                                                         |
| Crystal system                              | monoclinic                                                    |
| Space group                                 | P2 <sub>1</sub> /c                                            |
| a/Å                                         | 8.8780(5)                                                     |
| b/Å                                         | 14.3449(9)                                                    |
| c/Å                                         | 21.4134(12)                                                   |
| $\alpha$ /°                                 | 90.00                                                         |
| $\beta$ /°                                  | 98.826(2)                                                     |
| $\gamma$ /°                                 | 90.00                                                         |
| Volume/Å <sup>3</sup>                       | 2694.8(3)                                                     |
| Z                                           | 4                                                             |
| $\rho_{\text{calc}}$ /g/cm <sup>3</sup>     | 1.537                                                         |
| $\mu$ /mm <sup>-1</sup>                     | 1.230                                                         |
| F(000)                                      | 1264.0                                                        |
| Crystal size/mm <sup>3</sup>                | 0.1 × 0.1 × 0.1                                               |
| Radiation                                   | MoK $\alpha$ ( $\lambda$ = 0.71073)                           |
| 2 $\Theta$ range for data collection/°      | 4.64 to 52.88                                                 |
| Index ranges                                | -11 ≤ h ≤ 11, -17 ≤ k ≤ 17, -26 ≤ l ≤ 26                      |
| Reflections collected                       | 69940                                                         |
| Independent reflections                     | 5531 [R <sub>int</sub> = 0.0865, R <sub>sigma</sub> = 0.0320] |
| Data/restraints/parameters                  | 5531/0/347                                                    |
| Goodness-of-fit on F <sup>2</sup>           | 1.052                                                         |
| Final R indexes [I ≥ 2 $\sigma$ (I)]        | R <sub>1</sub> = 0.0350, wR <sub>2</sub> = 0.0769             |
| Final R indexes [all data]                  | R <sub>1</sub> = 0.0569, wR <sub>2</sub> = 0.0864             |
| Largest diff. peak/hole / e Å <sup>-3</sup> | 1.08/-0.84                                                    |

## HPLC traces:

(S)-4-((1*R*,3*R*)-2-acetyl-1,4-diphenylbuta-2,3-dien-1-yl)-2-(3,5-dimethoxyphenyl)-4-ethylloxazol-5(4*H*)

-one (3a)

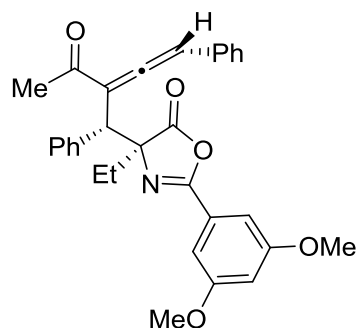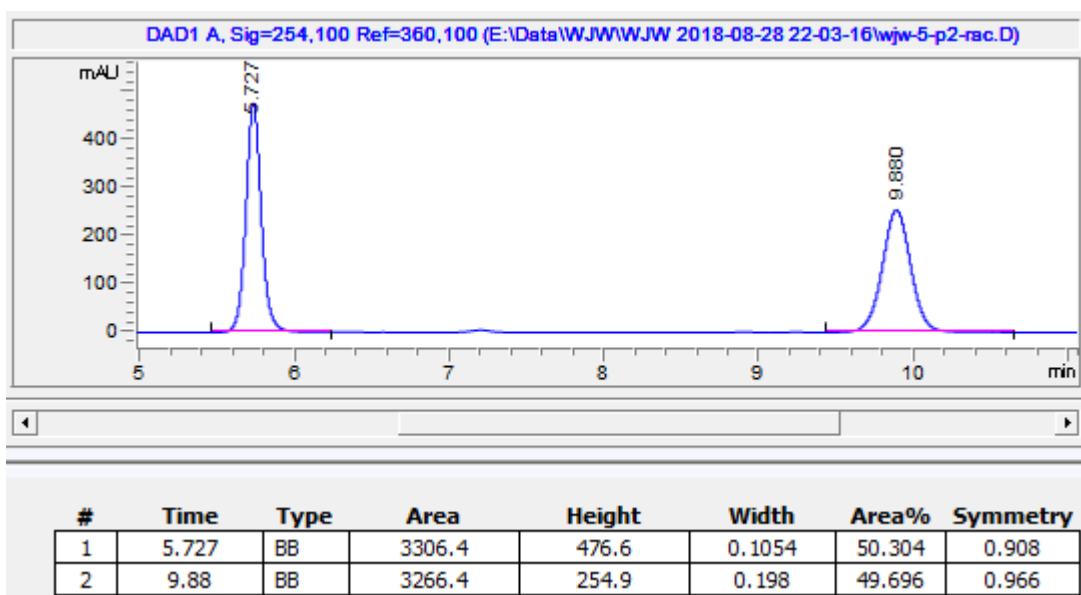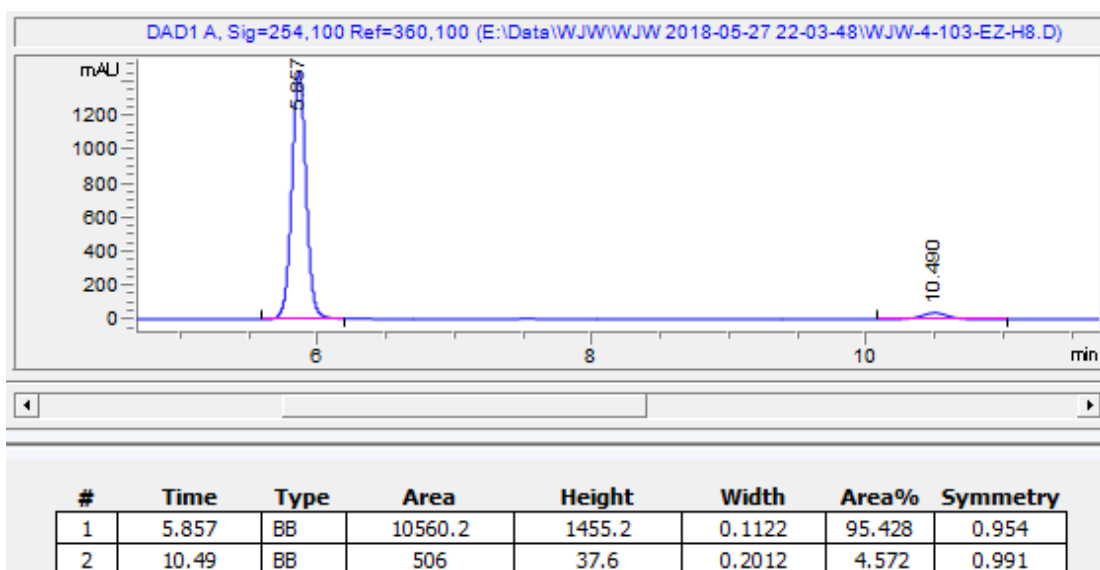



(S)-4-((1*R*,3*R*)-2-acetyl-1-phenyl-4-(p-tolyl)buta-2,3-dien-1-yl)-2-(3,5-dimethoxyphenyl)-4-ethyloxazol-5(4H)-one (**3b**)

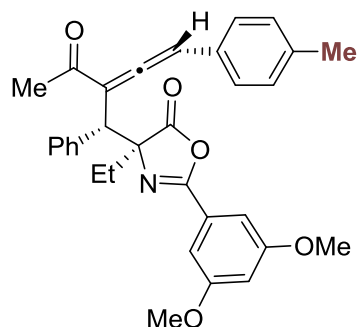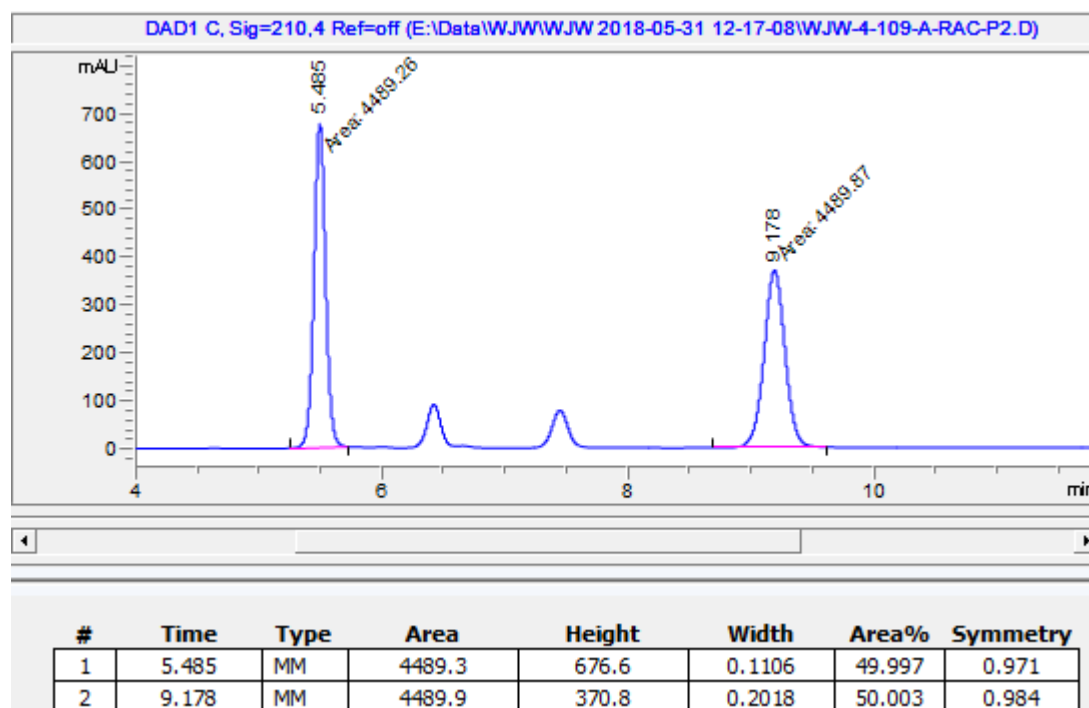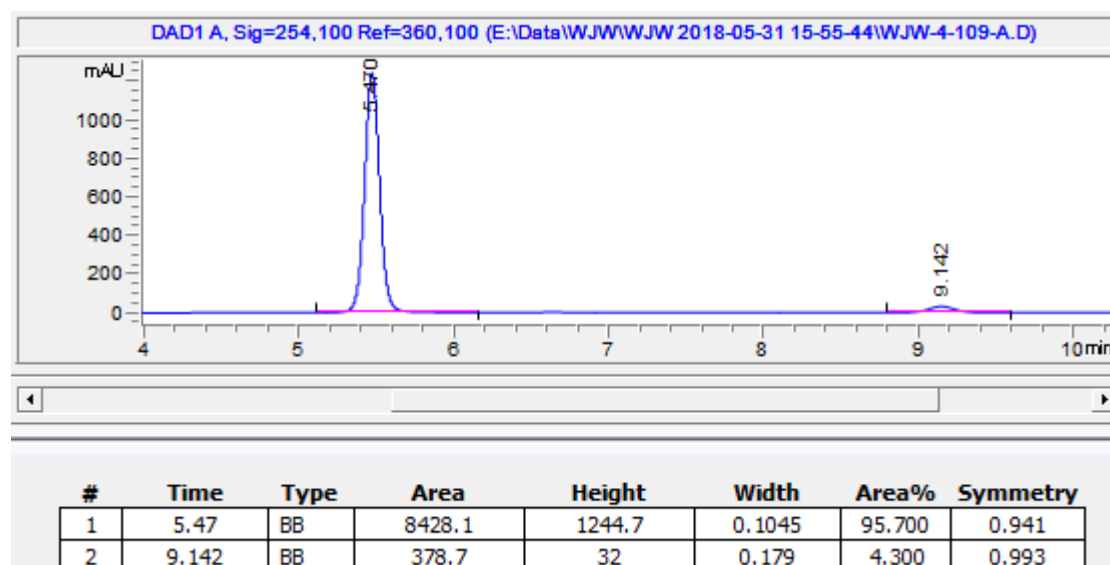

(S)-4-((1*R*,3*R*)-2-acetyl-4-(4-chlorophenyl)-1-phenylbuta-2,3-dien-1-yl)-2-(3,5-dimethoxyphenyl)-4-ethyl-5(4*H*)-oxazol-5-one (**3c**)

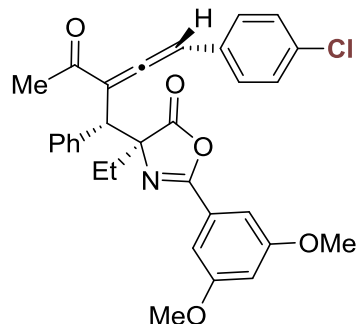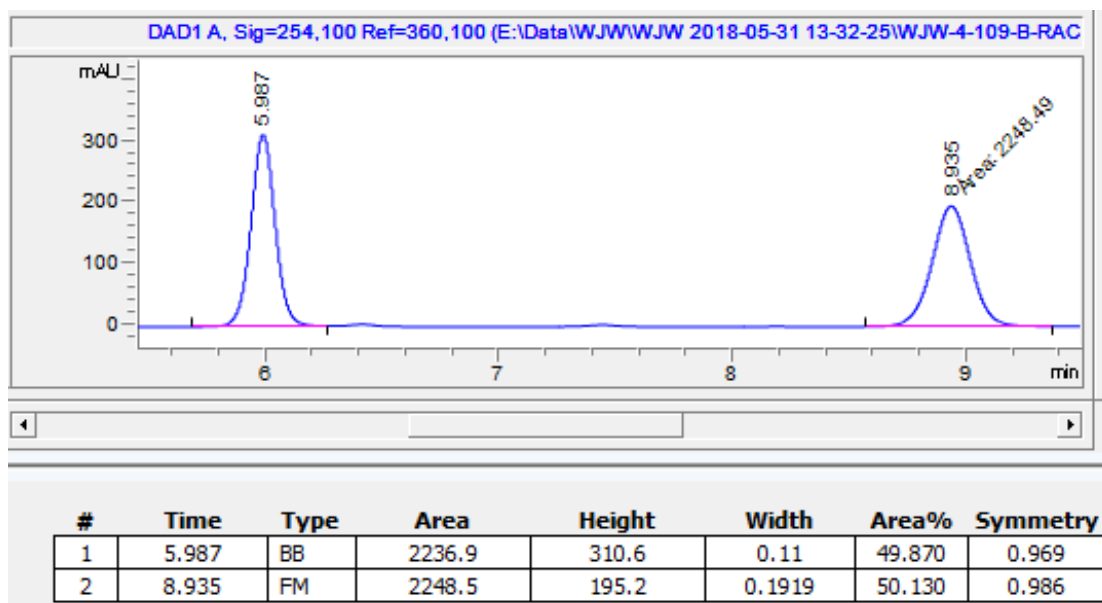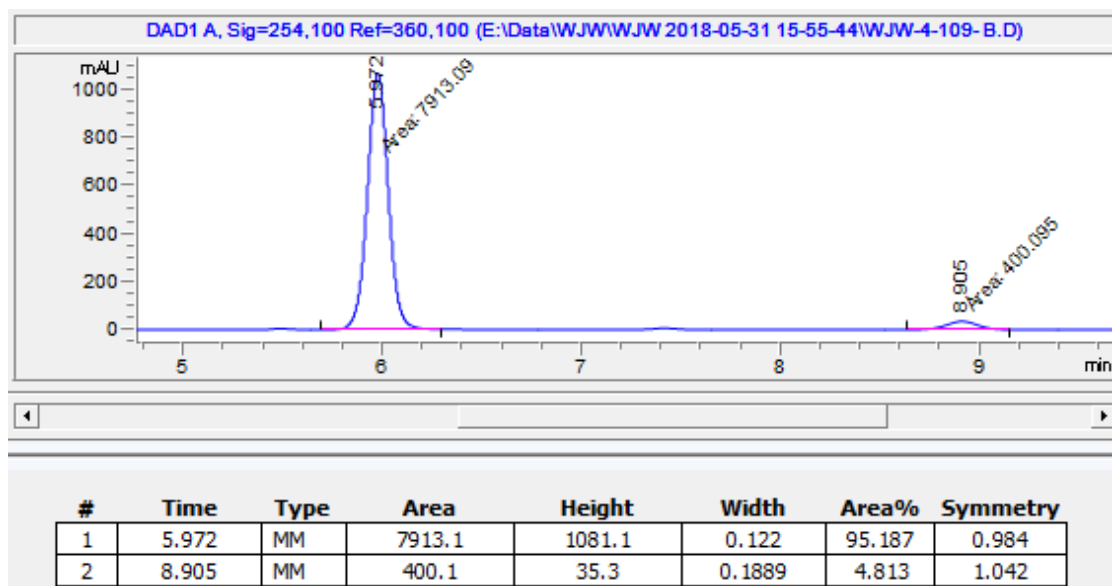

(S)-4-((1*R*,3*R*)-2-acetyl-4-(4-methoxyphenyl)-1-phenylbuta-2,3-dien-1-yl)-2-(3,5-dimethoxyphenyl)-4-ethyloxazol-5(4H)-one (**3d**)

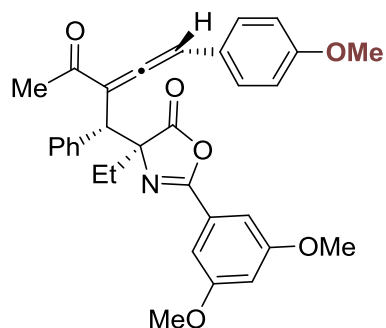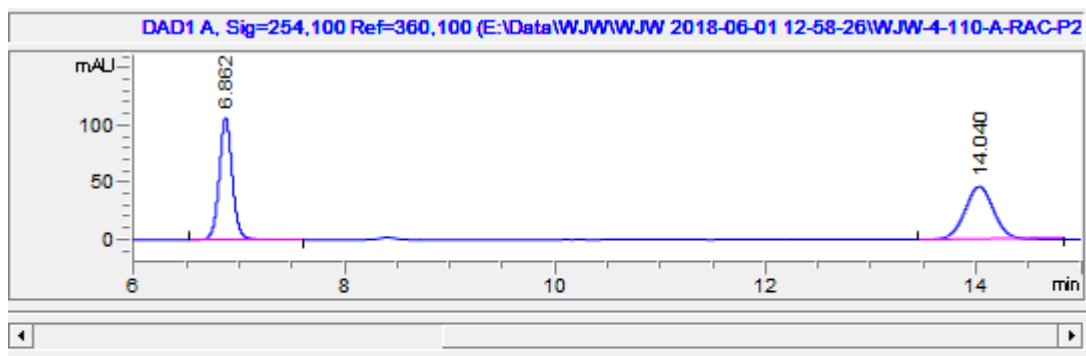

| # | Time  | Type | Area  | Height | Width  | Area%  | Symmetry |
|---|-------|------|-------|--------|--------|--------|----------|
| 1 | 6.862 | BB   | 912.9 | 105.8  | 0.1322 | 50.926 | 0.929    |
| 2 | 14.04 | BB   | 879.7 | 46     | 0.2907 | 49.074 | 0.958    |

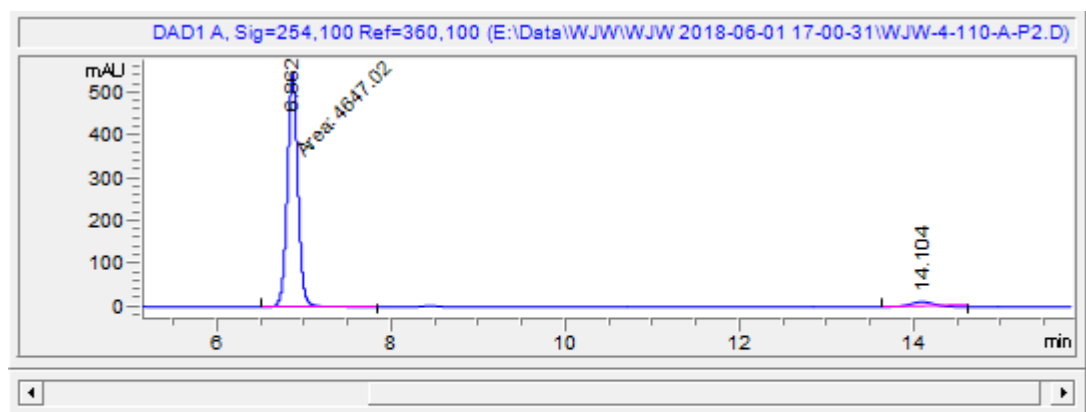

| # | Time   | Type | Area  | Height | Width  | Area%  | Symmetry |
|---|--------|------|-------|--------|--------|--------|----------|
| 1 | 6.862  | MM   | 4647  | 548.4  | 0.1412 | 95.315 | 0.96     |
| 2 | 14.104 | BB   | 228.4 | 12     | 0.2272 | 4.685  | 0.966    |

(S)-4-((1*R*,3*R*)-2-acetyl-4-(4-fluorophenyl)-1-phenylbuta-2,3-dien-1-yl)-2-(3,5-dimethoxyphenyl)-4-ethyloxazol-5(4H)-one (**3e**)

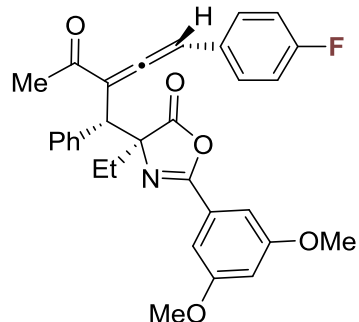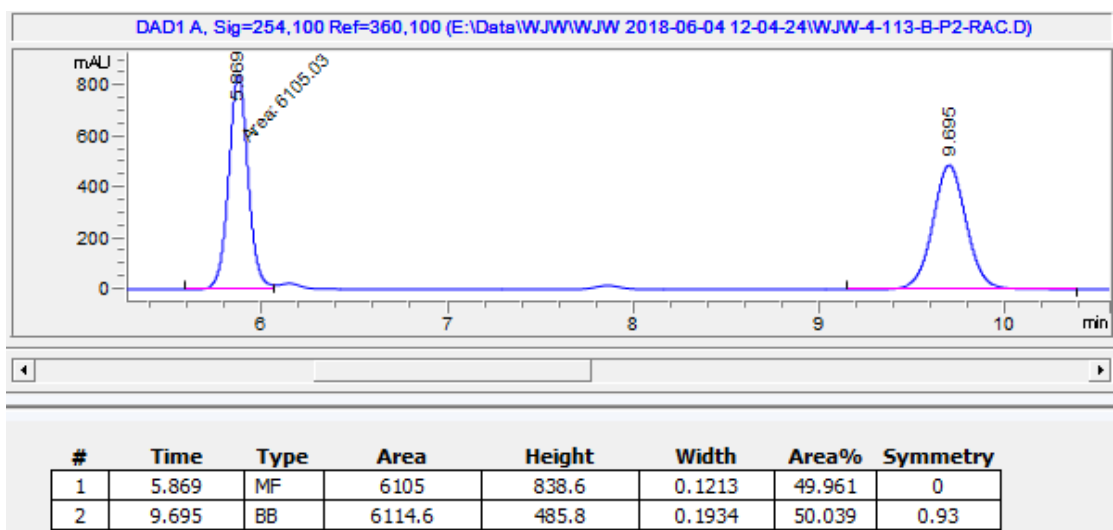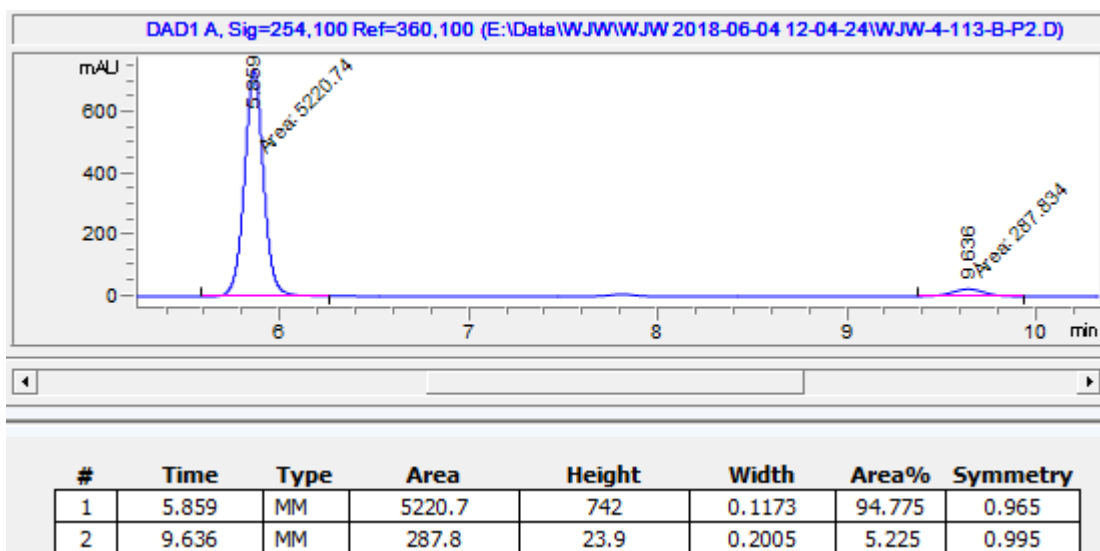

(S)-4-((1*R*,3*R*)-2-acetyl-1-phenyl-4-(4-(trifluoromethyl)phenyl)buta-2,3-dien-1-yl)-2-(3,5-dimethoxyphenyl)-4-ethyloxazol-5(4*H*)-one (**3f**)

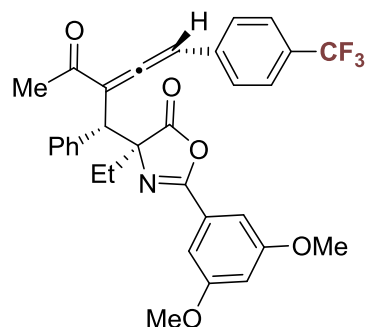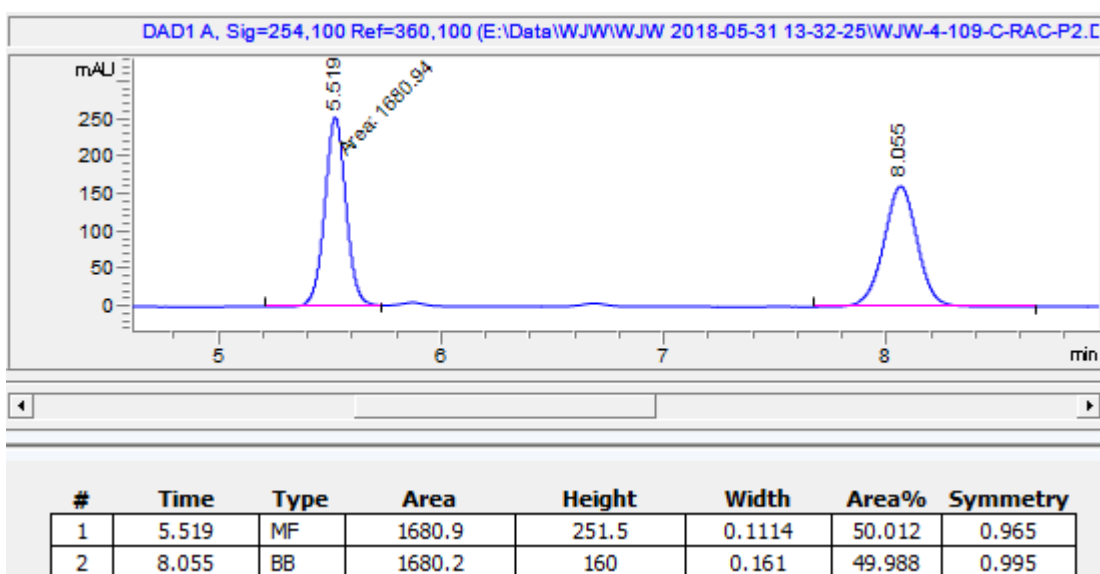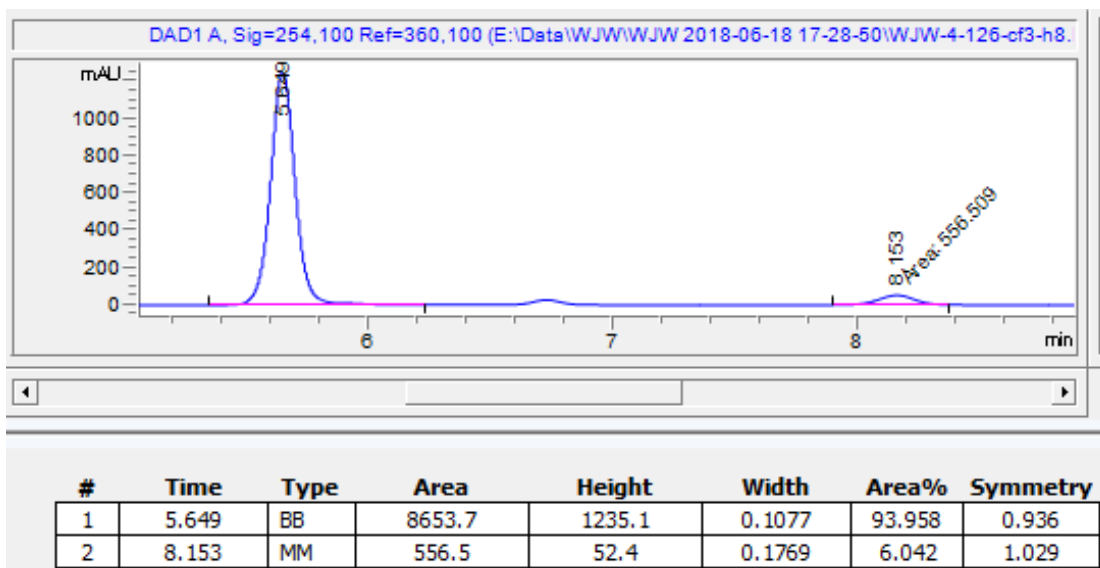

Methyl-3-((*R*)-3-((*R*)-((*S*)-2-(3,5-dimethoxyphenyl)-4-ethyl-5-oxo-4,5-dihydrooxazol-4-yl)(phenyl)methyl)-4-oxopenta-1,2-dien-1-yl)benzoate (**3g**)

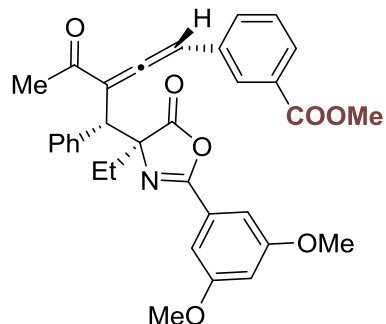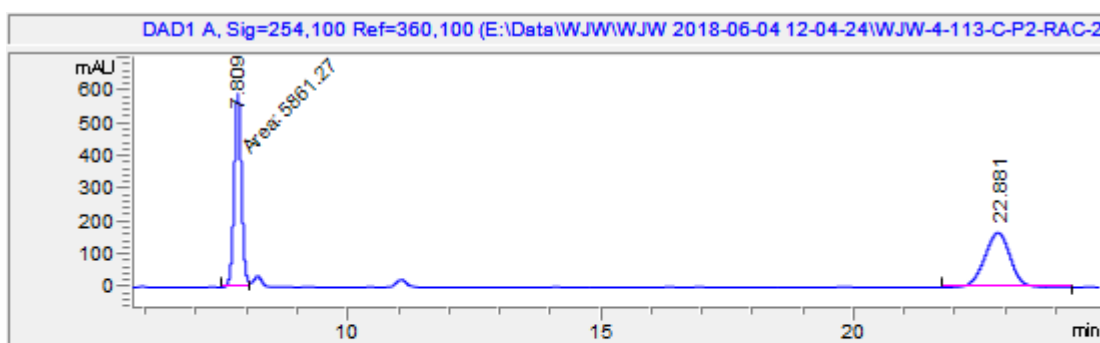

| # | Time   | Type | Area   | Height | Width  | Area%  | Symmetry |
|---|--------|------|--------|--------|--------|--------|----------|
| 1 | 7.809  | MM   | 5861.3 | 588.2  | 0.1661 | 49.925 | 0.958    |
| 2 | 22.881 | BB   | 5878.8 | 165.9  | 0.5135 | 50.075 | 1.074    |

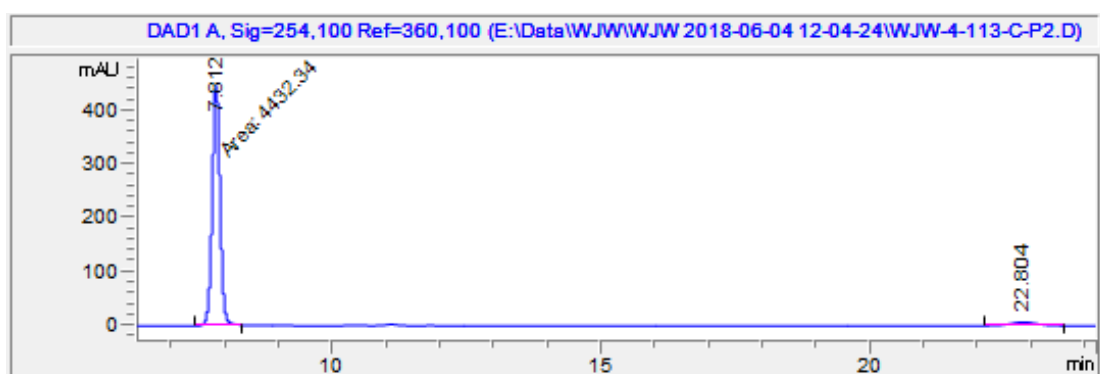

| # | Time   | Type | Area   | Height | Width  | Area%  | Symmetry |
|---|--------|------|--------|--------|--------|--------|----------|
| 1 | 7.812  | MM   | 4432.3 | 444.8  | 0.1661 | 95.166 | 0.965    |
| 2 | 22.804 | BB   | 225.1  | 6.7    | 0.3961 | 4.834  | 1.001    |

(S)-4-((1R,3R)-2-acetyl-4-(2-chlorophenyl)-1-phenylbuta-2,3-dien-1-yl)-2-(3,5-dimethoxyphenyl)-4-ethyloxazol-5(4H)-one (**3h**)

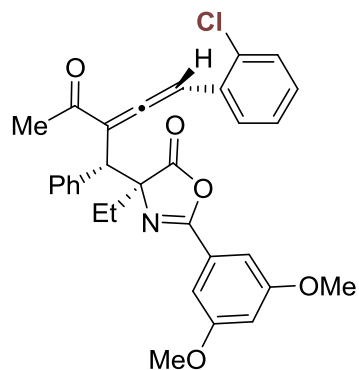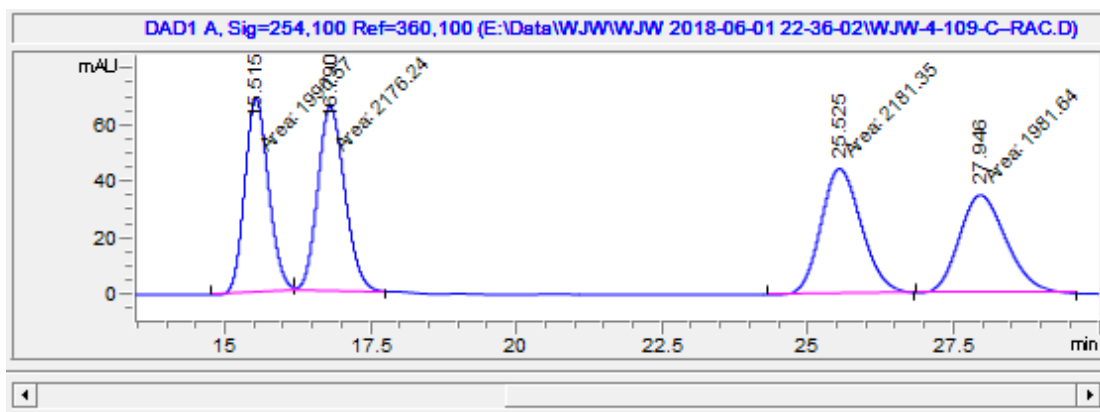

| # | Time   | Type | Area   | Height | Width  | Area%  | Symmetry |
|---|--------|------|--------|--------|--------|--------|----------|
| 1 | 15.515 | MM   | 1990.6 | 69.8   | 0.4755 | 23.897 | 0.843    |
| 2 | 16.79  | MM   | 2176.2 | 66.5   | 0.5451 | 26.126 | 0.829    |
| 3 | 25.525 | MM   | 2181.4 | 44.9   | 0.8097 | 26.187 | 0.819    |
| 4 | 27.946 | MM   | 1981.6 | 35.1   | 0.9402 | 23.790 | 0.804    |

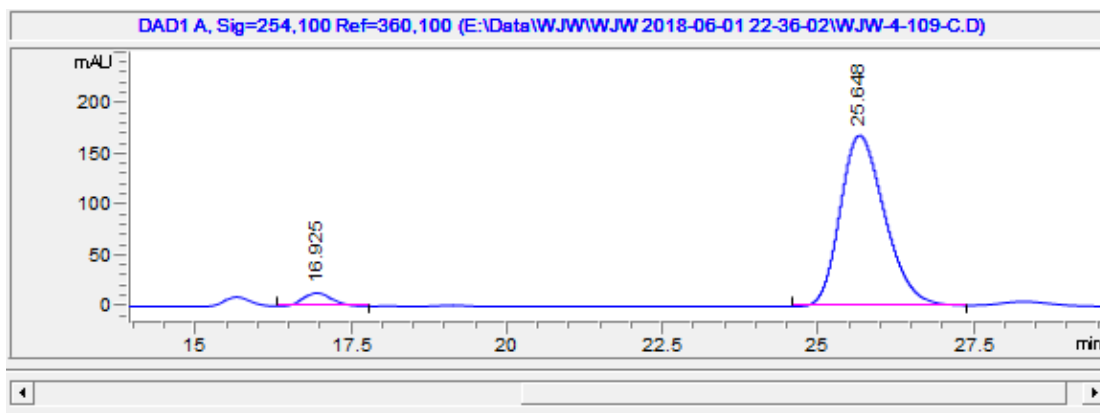

| # | Time   | Type | Area   | Height | Width  | Area%  | Symmetry |
|---|--------|------|--------|--------|--------|--------|----------|
| 1 | 16.925 | BB   | 424.5  | 13.1   | 0.3837 | 4.799  | 0.875    |
| 2 | 25.648 | BB   | 8420.7 | 169.1  | 0.6555 | 95.201 | 0.725    |

(S)-4-((1*R*,3*R*)-2-acetyl-1-phenyl-4-(thiophen-3-yl)buta-2,3-dien-1-yl)-2-(3,5-dimethoxyphenyl)-4-ethylloxazol-5(4*H*)-one (**3i**)

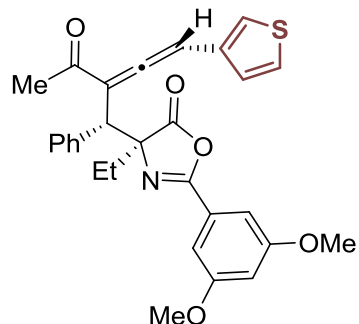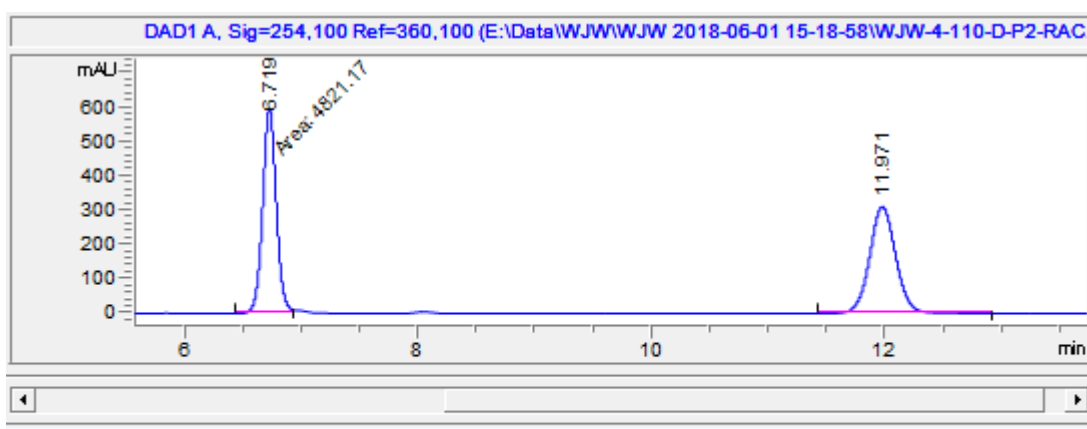

| # | Time   | Type | Area   | Height | Width  | Area%  | Symmetry |
|---|--------|------|--------|--------|--------|--------|----------|
| 1 | 6.719  | MF   | 4821.2 | 593.1  | 0.1355 | 50.033 | 0.952    |
| 2 | 11.971 | BB   | 4814.7 | 310.4  | 0.2365 | 49.967 | 0.92     |

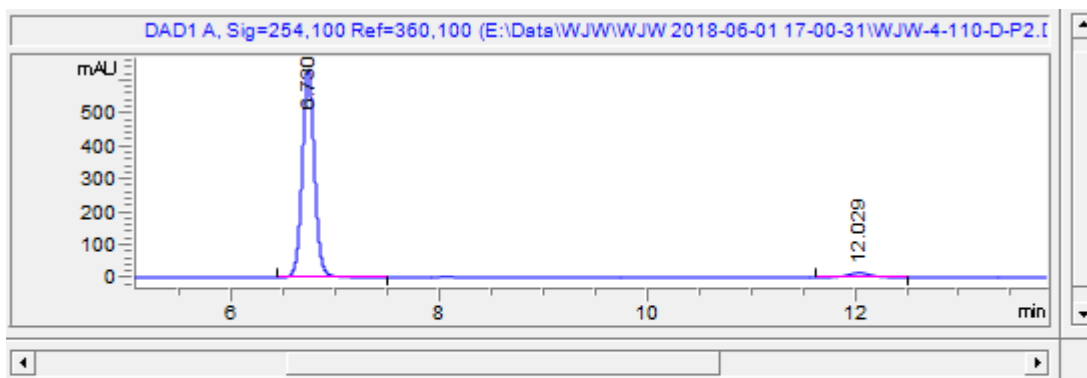

| # | Time   | Type | Area  | Height | Width  | Area%  | Symmetry |
|---|--------|------|-------|--------|--------|--------|----------|
| 1 | 6.73   | BB   | 5179  | 634    | 0.1248 | 96.078 | 0.937    |
| 2 | 12.029 | BB   | 211.4 | 13.7   | 0.2032 | 3.922  | 1.012    |



(S)-4-((1*R*,3*R*)-2-acetyl-4-(cyclohex-1-en-1-yl)-1-phenylbuta-2,3-dien-1-yl)-2-(3,5-dimethoxyphenyl)-4-ethyloxazol-5(4*H*)-one (**3j**)

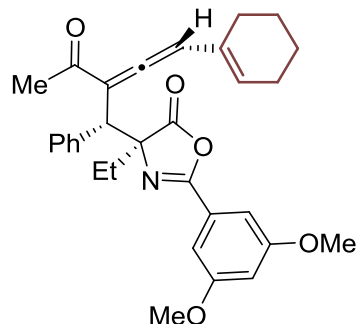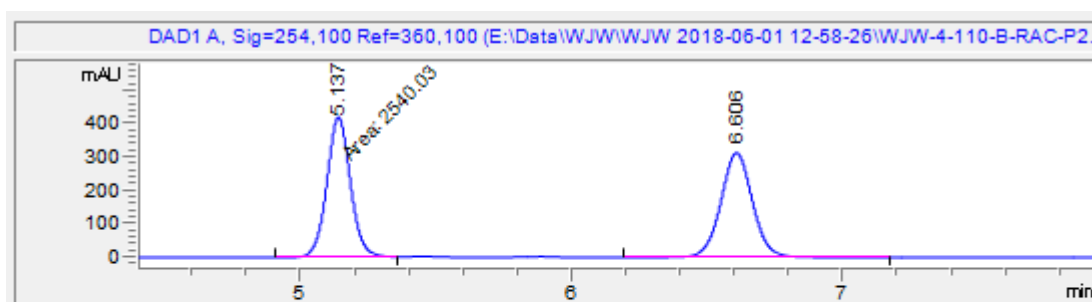

| # | Time  | Type | Area   | Height | Width  | Area%  | Symmetry |
|---|-------|------|--------|--------|--------|--------|----------|
| 1 | 5.137 | MF   | 2540   | 416.7  | 0.1016 | 49.977 | 0.941    |
| 2 | 6.606 | BB   | 2542.4 | 310.7  | 0.1255 | 50.023 | 0.96     |

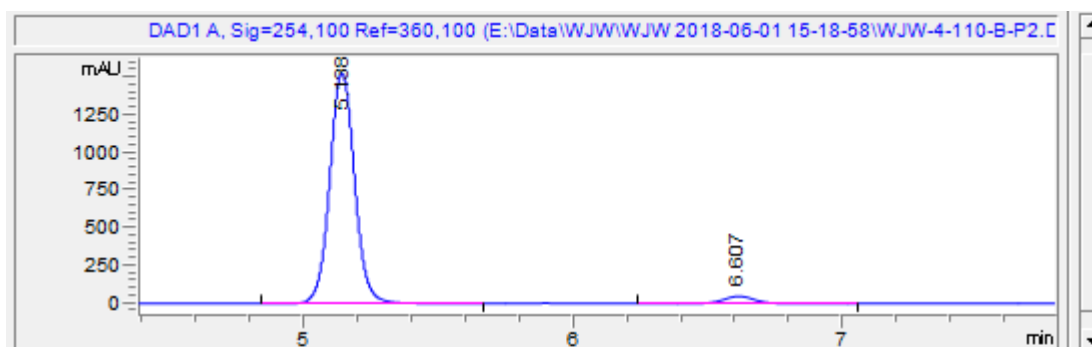

| # | Time  | Type | Area   | Height | Width  | Area%  | Symmetry |
|---|-------|------|--------|--------|--------|--------|----------|
| 1 | 5.138 | BB   | 9986.7 | 1550.4 | 0.0997 | 96.004 | 0.919    |
| 2 | 6.607 | BB   | 415.7  | 50.5   | 0.1266 | 3.996  | 0.968    |

(S)-4-((1*R*,3*R*)-2-acetyl-1-phenylocta-2,3-dien-1-yl)-2-(3,5-dimethoxyphenyl)-4-ethyloxazol-5(4*H*)-one  
 e (3k)

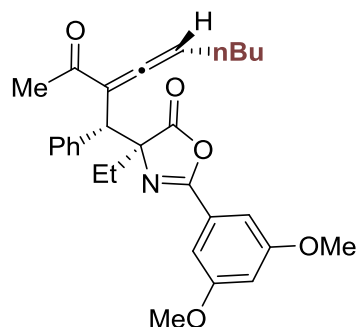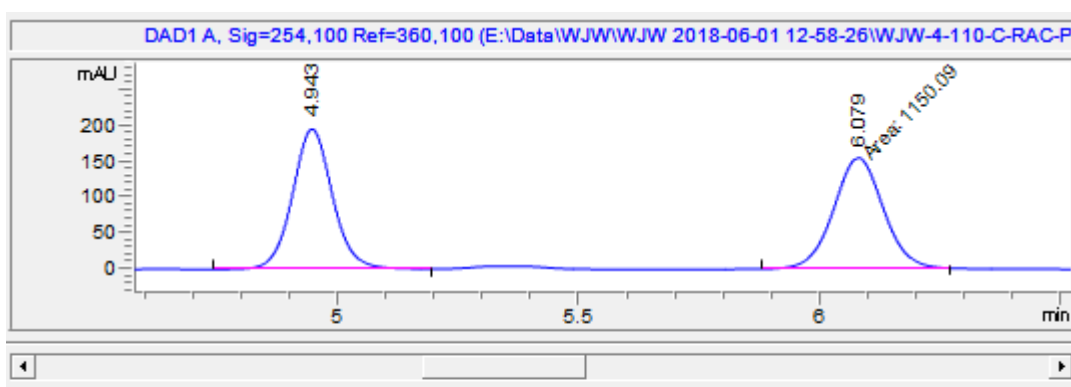

| # | Time  | Type | Area   | Height | Width  | Area%  | Symmetry |
|---|-------|------|--------|--------|--------|--------|----------|
| 1 | 4.943 | BB   | 1148.1 | 198.1  | 0.0886 | 49.957 | 0.927    |
| 2 | 6.079 | MF   | 1150.1 | 157.7  | 0.1216 | 50.043 | 0.966    |

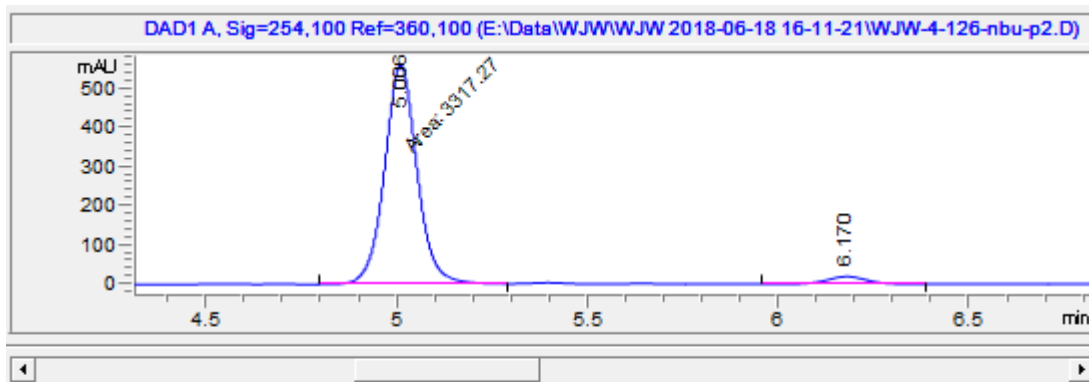

| # | Time  | Type | Area   | Height | Width  | Area%  | Symmetry |
|---|-------|------|--------|--------|--------|--------|----------|
| 1 | 5.006 | MM   | 3317.3 | 555.7  | 0.0995 | 95.906 | 0.933    |
| 2 | 6.17  | BB   | 141.6  | 19.3   | 0.1132 | 4.094  | 0.995    |

(S)-4-((1*R*,3*R*)-2-acetyl-4-phenyl-1-(p-tolyl)buta-2,3-dien-1-yl)-2-(3,5-dimethoxyphenyl)-4-ethyloxazol-5(4*H*)-one (**31**)

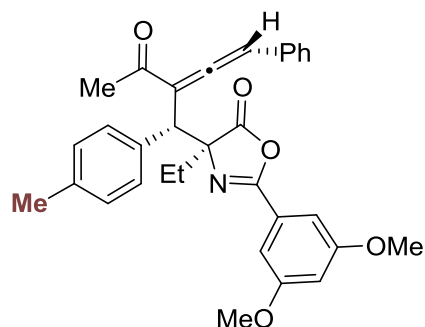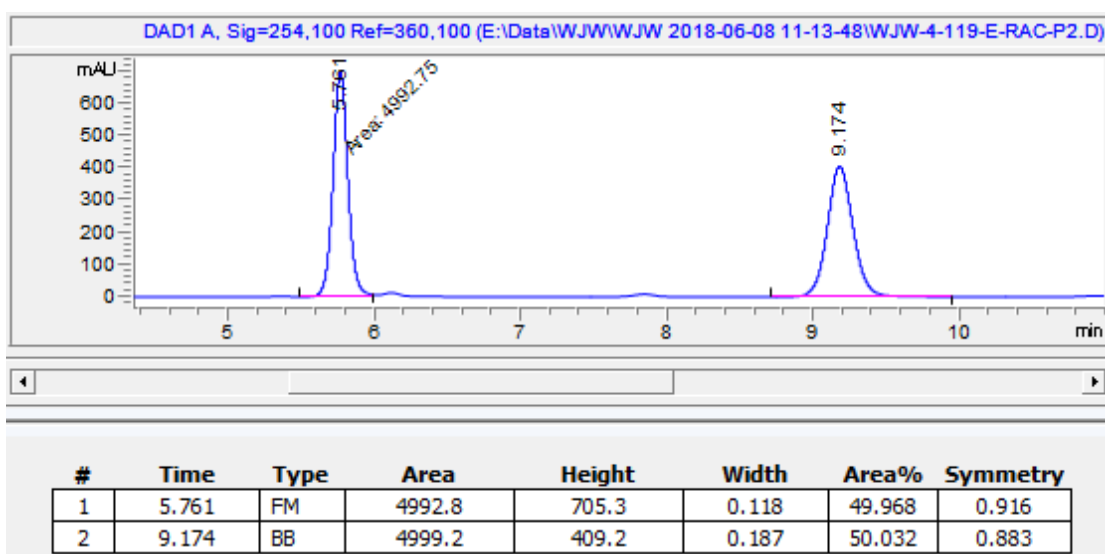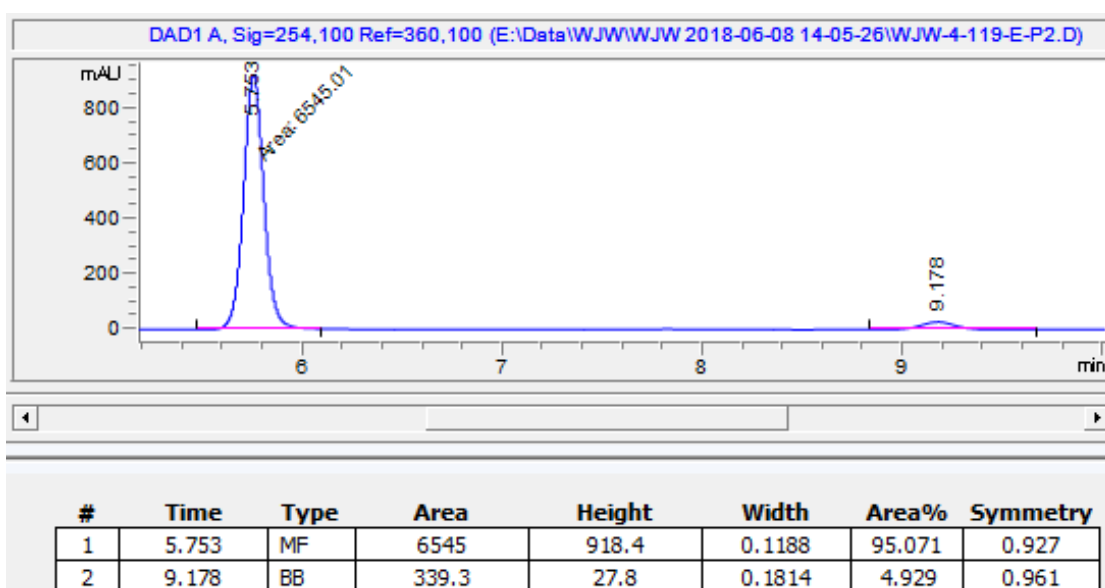

(S)-4-((1*R*,3*R*)-2-acetyl-1-(4-fluorophenyl)-4-phenylbuta-2,3-dien-1-yl)-2-(3,5-dimethoxyphenyl)-4-ethylloxazol-5(4*H*)-one (**3m**)

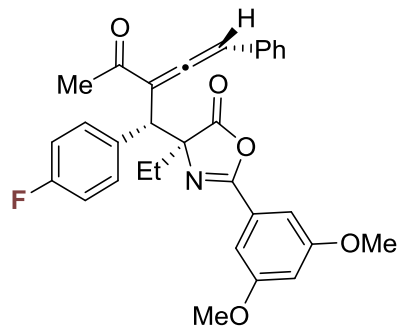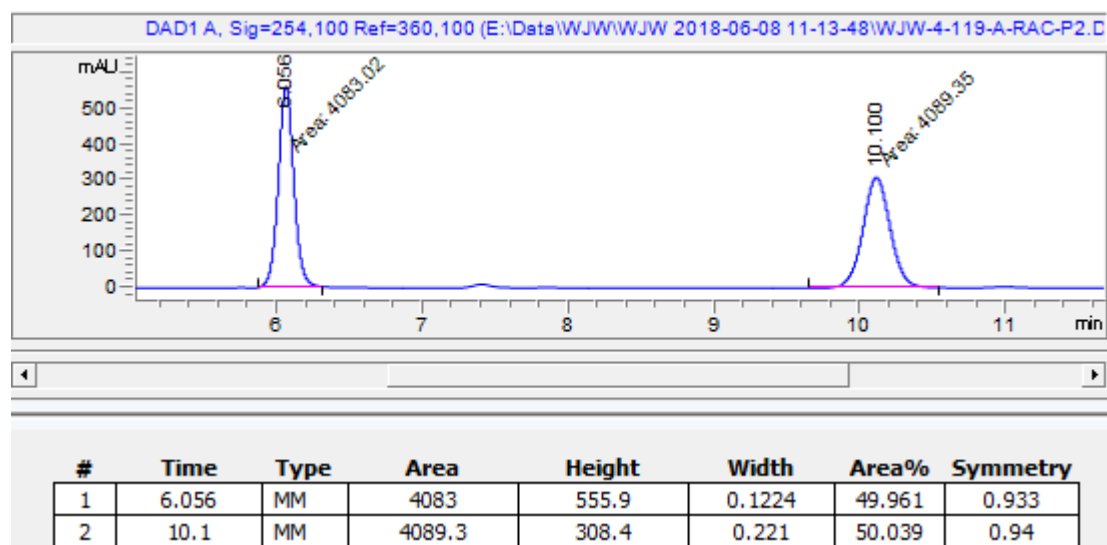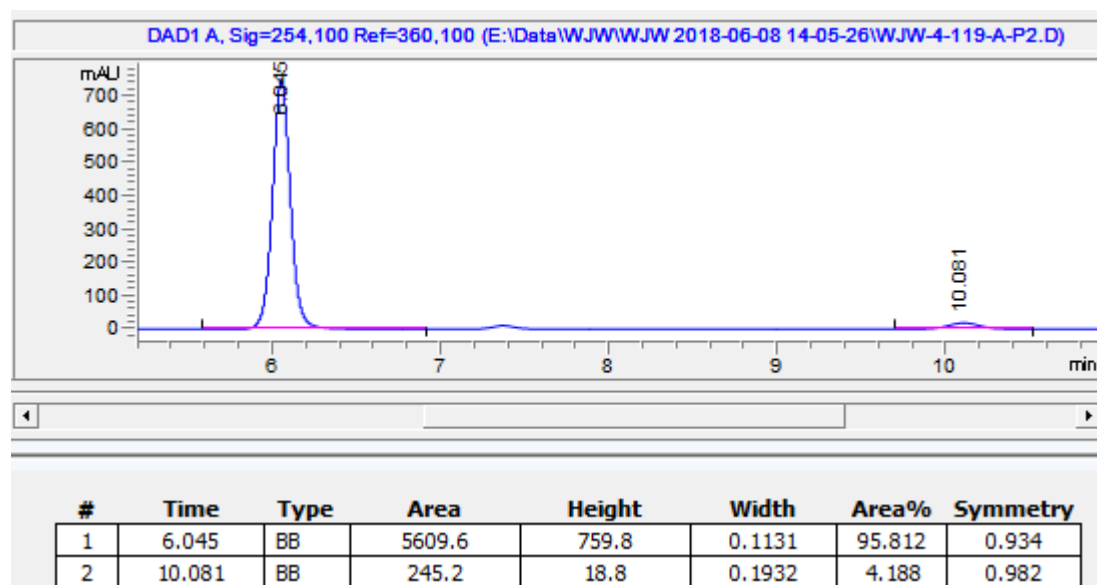

(S)-4-((1*R*,3*R*)-2-acetyl-1-(4-chlorophenyl)-4-phenylbuta-2,3-dien-1-yl)-2-(3,5-dimethoxyphenyl)-4-ethyl-5(4*H*)-oxazol-5-one (**3n**)

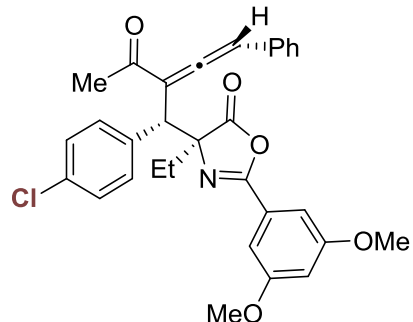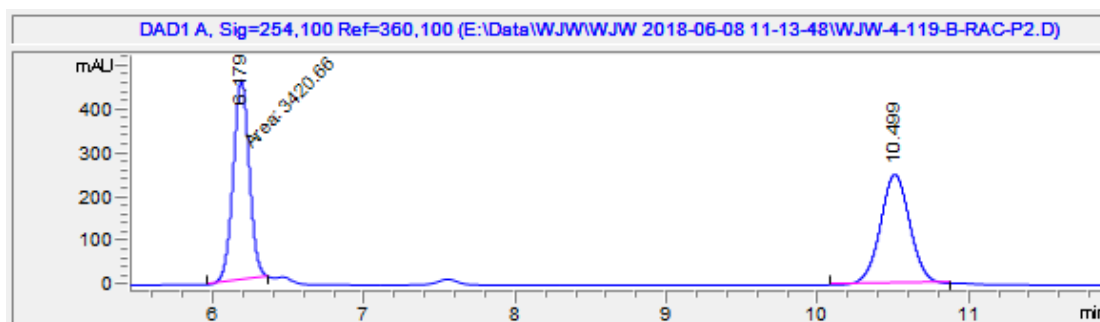

| # | Time   | Type | Area   | Height | Width  | Area%  | Symmetry |
|---|--------|------|--------|--------|--------|--------|----------|
| 1 | 6.179  | MM   | 3420.7 | 460.1  | 0.1239 | 49.987 | 0.993    |
| 2 | 10.499 | BB   | 3422.4 | 251.5  | 0.2098 | 50.013 | 0.956    |

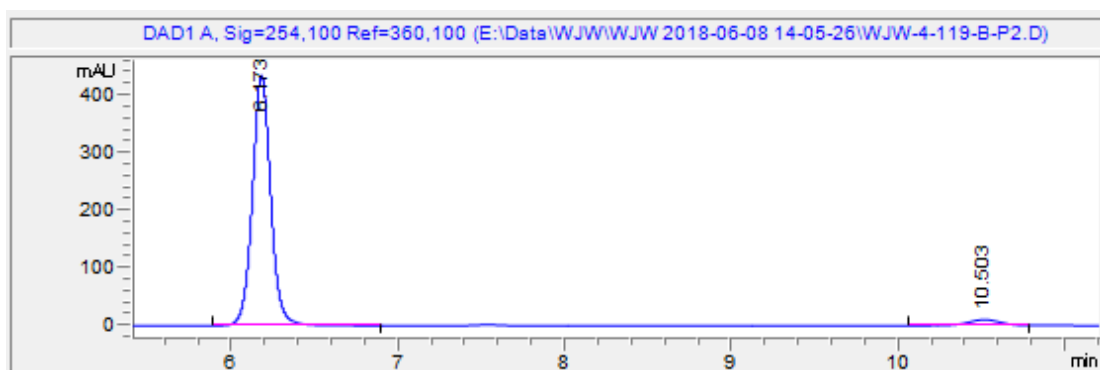

| # | Time   | Type | Area   | Height | Width  | Area%  | Symmetry |
|---|--------|------|--------|--------|--------|--------|----------|
| 1 | 6.173  | BB   | 3337.4 | 438.2  | 0.1163 | 96.005 | 0.932    |
| 2 | 10.503 | BB   | 138.9  | 10.3   | 0.1753 | 3.995  | 1.094    |

(S)-4-((1*R*,3*R*)-2-acetyl-1-(4-methoxyphenyl)-4-phenylbuta-2,3-dien-1-yl)-2-(3,5-dimethoxyphenyl)-4-ethyloxazol-5(4*H*)-one (**3o**)

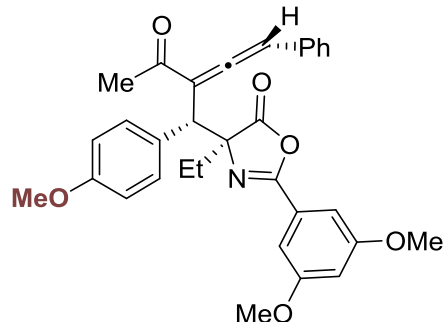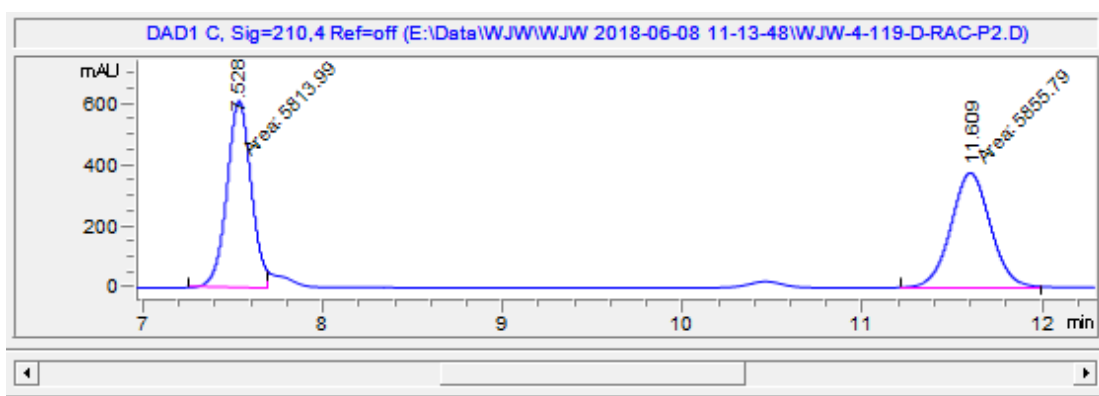

| # | Time   | Type | Area   | Height | Width  | Area%  | Symmetry |
|---|--------|------|--------|--------|--------|--------|----------|
| 1 | 7.528  | MM   | 5814   | 608.8  | 0.1592 | 49.821 | 0.977    |
| 2 | 11.609 | MM   | 5855.8 | 375.2  | 0.2601 | 50.179 | 0.949    |

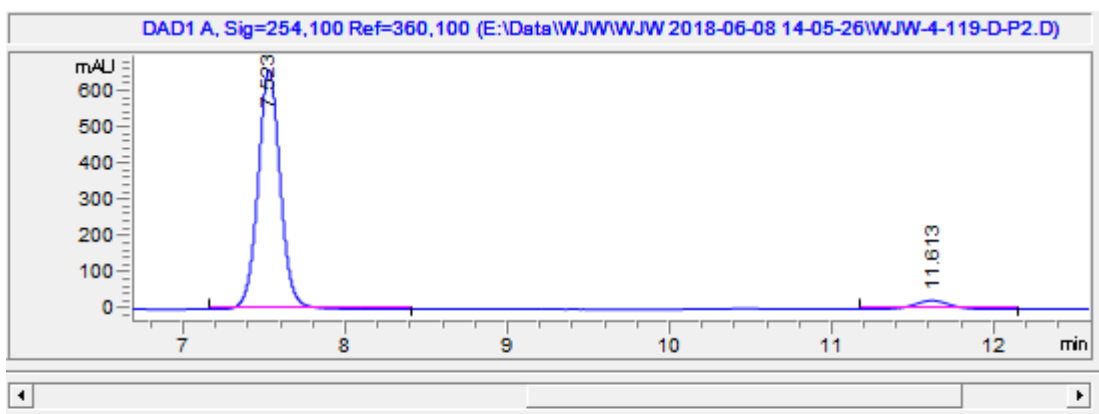

| # | Time   | Type | Area   | Height | Width  | Area%  | Symmetry |
|---|--------|------|--------|--------|--------|--------|----------|
| 1 | 7.523  | BB   | 6354.2 | 663.7  | 0.1467 | 94.520 | 0.924    |
| 2 | 11.613 | BB   | 368.4  | 24     | 0.2268 | 5.480  | 0.987    |

(S)-4-((1*R*,3*R*)-2-acetyl-1-(naphthalen-2-yl)-4-phenylbuta-2,3-dien-1-yl)-2-(3,5-dimethoxyphenyl)-4-ethylisoxazol-5(4*H*)-one (**3p**)

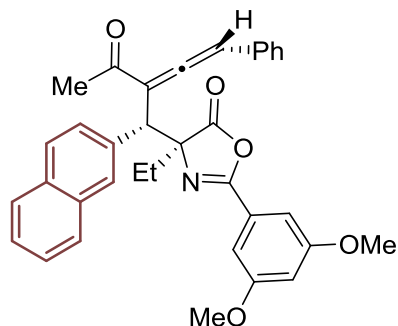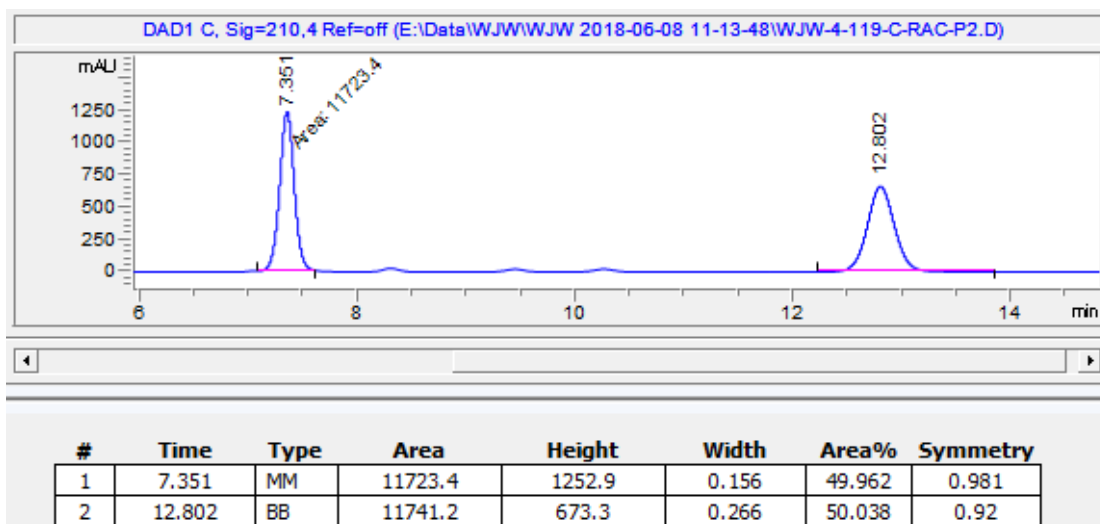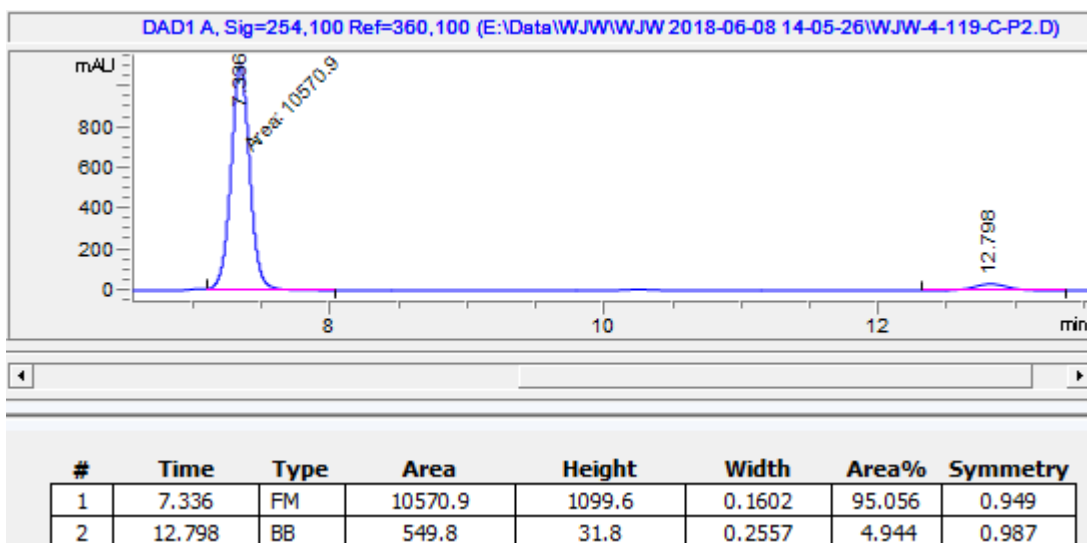

(S)-4-((1*R*,3*R*)-2-acetyl-1-cyclohexyl-4-phenylbuta-2,3-dien-1-yl)-2-(3,5-dimethoxyphenyl)-4-ethyloxazol-5(4*H*)-one (**3q**)

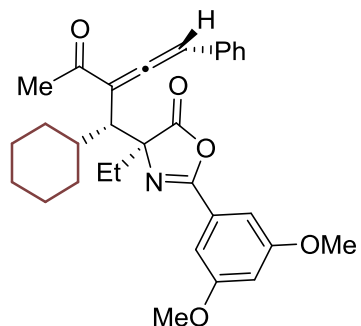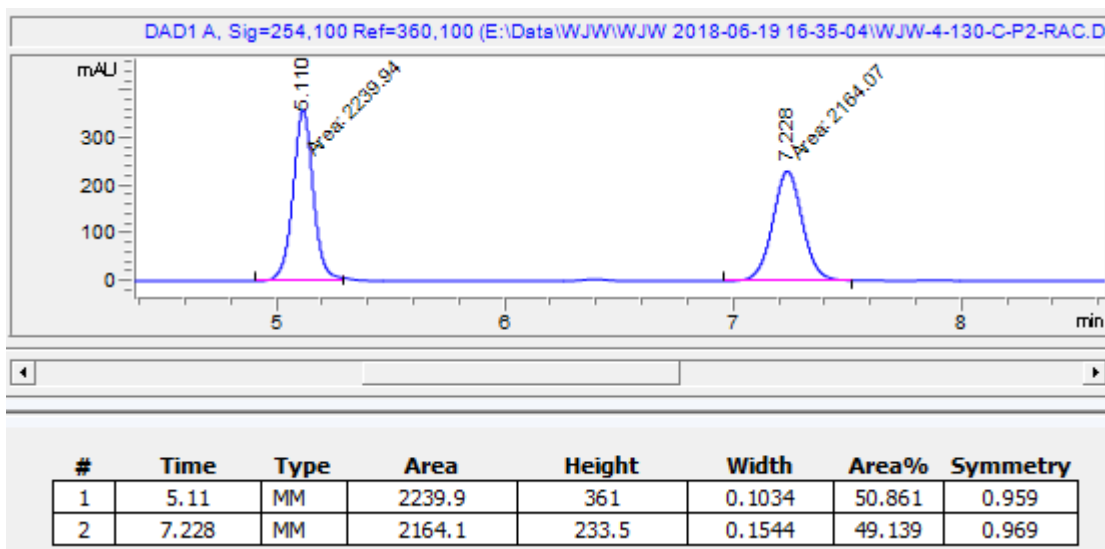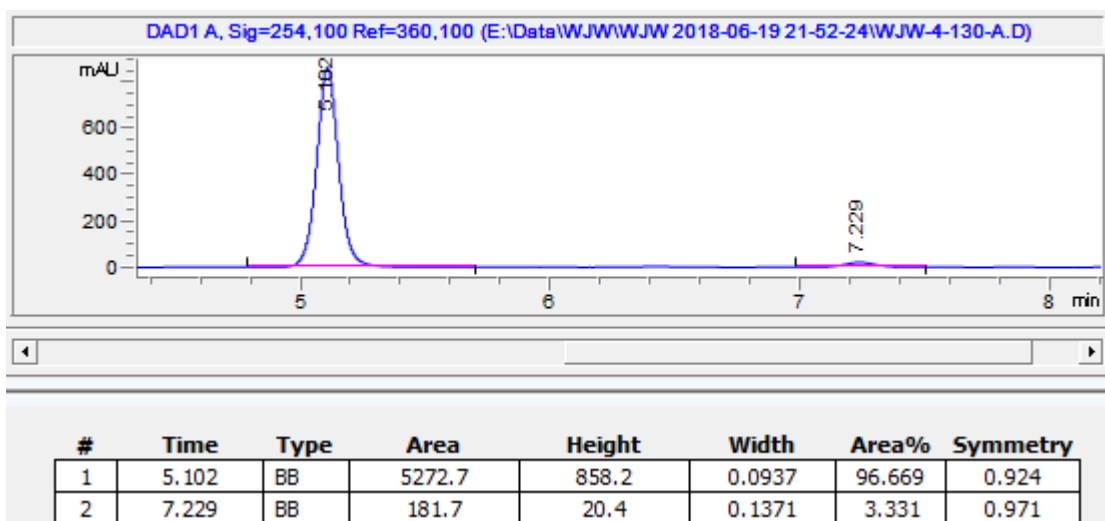



(S)-2-(3,5-dimethoxyphenyl)-4-ethyl-4-((R)-3-oxo-1-phenyl-2-((R)-2-phenylvinylidene)pentyl)oxazol-5(4H)-one (**3r**)

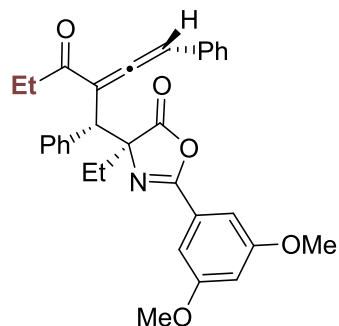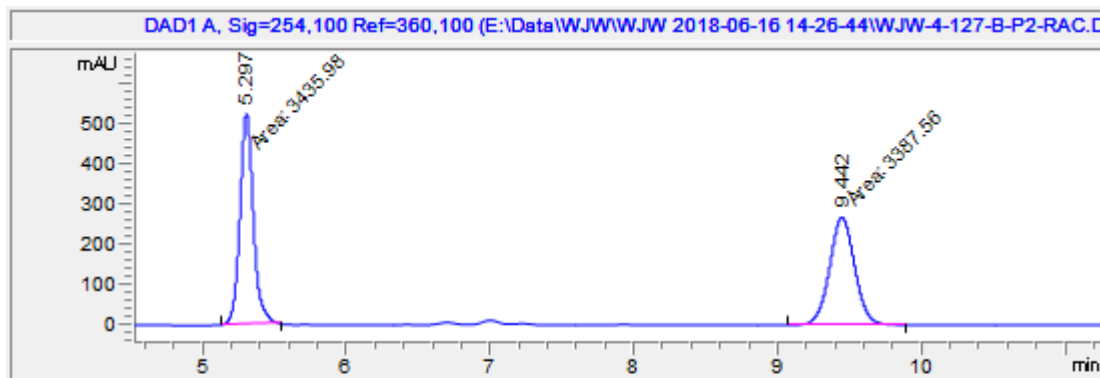

| # | Time  | Type | Area   | Height | Width  | Area%  | Symmetry |
|---|-------|------|--------|--------|--------|--------|----------|
| 1 | 5.297 | MM   | 3436   | 525.5  | 0.109  | 50.355 | 0.903    |
| 2 | 9.442 | MM   | 3387.6 | 270.7  | 0.2086 | 49.645 | 0.958    |

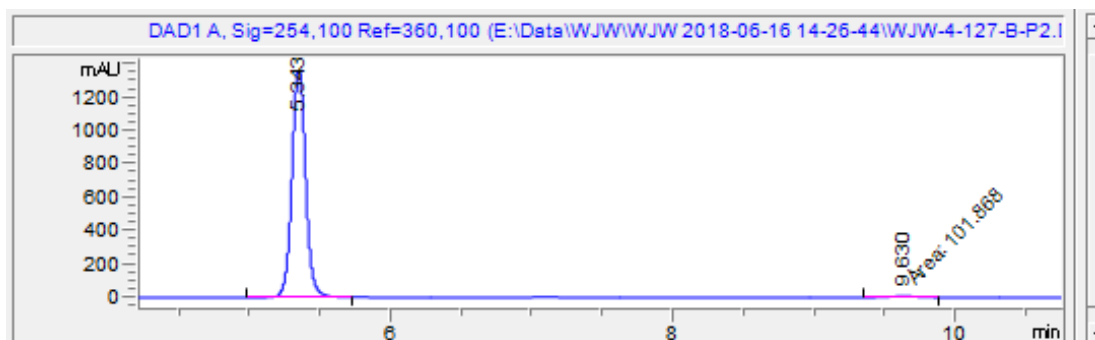

| # | Time  | Type | Area   | Height | Width  | Area%  | Symmetry |
|---|-------|------|--------|--------|--------|--------|----------|
| 1 | 5.343 | BB   | 9255.2 | 1363.6 | 0.1052 | 98.911 | 0.939    |
| 2 | 9.63  | MM   | 101.9  | 8.4    | 0.203  | 1.089  | 1.028    |

(S)-2-(3,5-dimethoxyphenyl)-4-ethyl-4-((R)-3-oxo-1-phenyl-2-((R)-2-phenylvinylidene)hexyl)oxazol-5  
(4H)-one (3s)

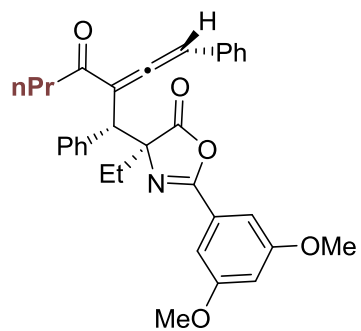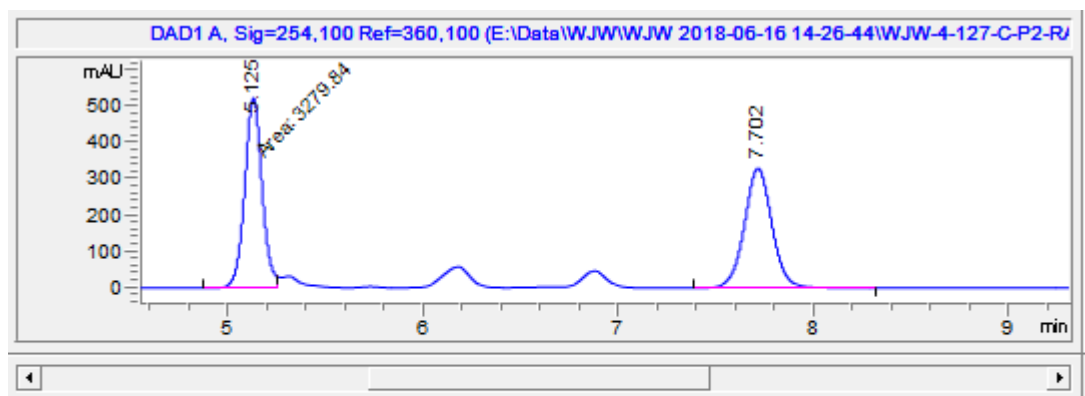

| # | Time  | Type | Area   | Height | Width  | Area%  | Symmetry |
|---|-------|------|--------|--------|--------|--------|----------|
| 1 | 5.125 | MF   | 3279.8 | 526.9  | 0.1038 | 50.265 | 0.944    |
| 2 | 7.702 | BB   | 3245.2 | 331.9  | 0.1491 | 49.735 | 0.952    |

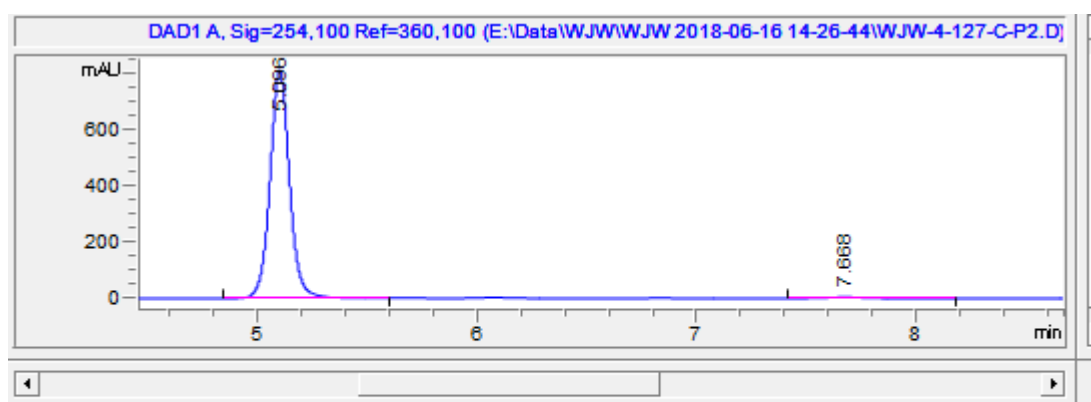

| # | Time  | Type | Area   | Height | Width  | Area%  | Symmetry |
|---|-------|------|--------|--------|--------|--------|----------|
| 1 | 5.096 | BB   | 5027.5 | 813.7  | 0.0941 | 99.076 | 0.925    |
| 2 | 7.668 | BB   | 46.9   | 4.8    | 0.1482 | 0.924  | 0.966    |

(S)-2-(3,5-dimethoxyphenyl)-4-ethyl-4-((R)-3-oxo-1-phenyl-2-((R)-2-phenylvinylidene)heptyl)oxazol-5(4H)-one (**3t**)

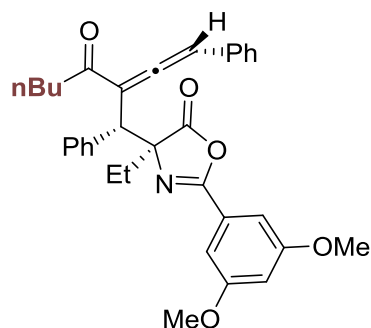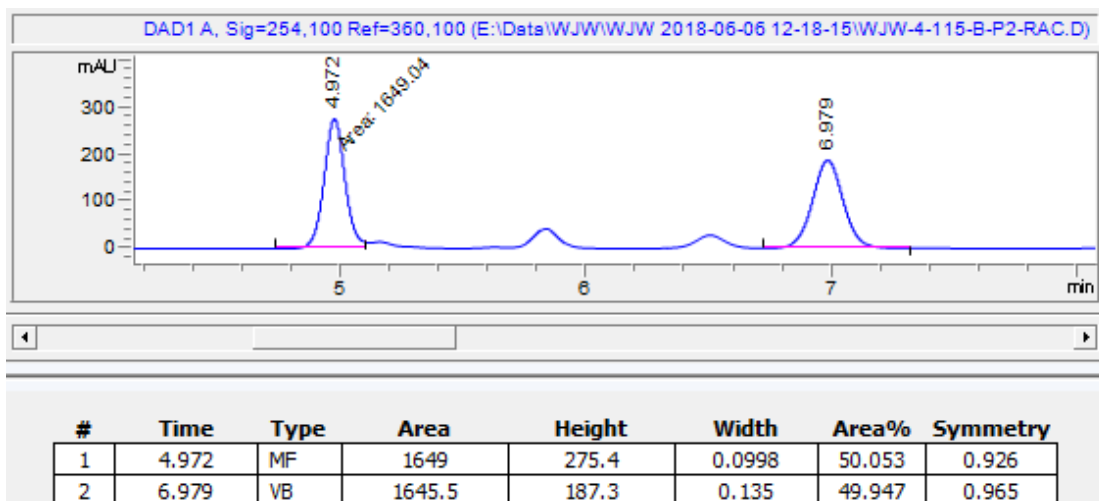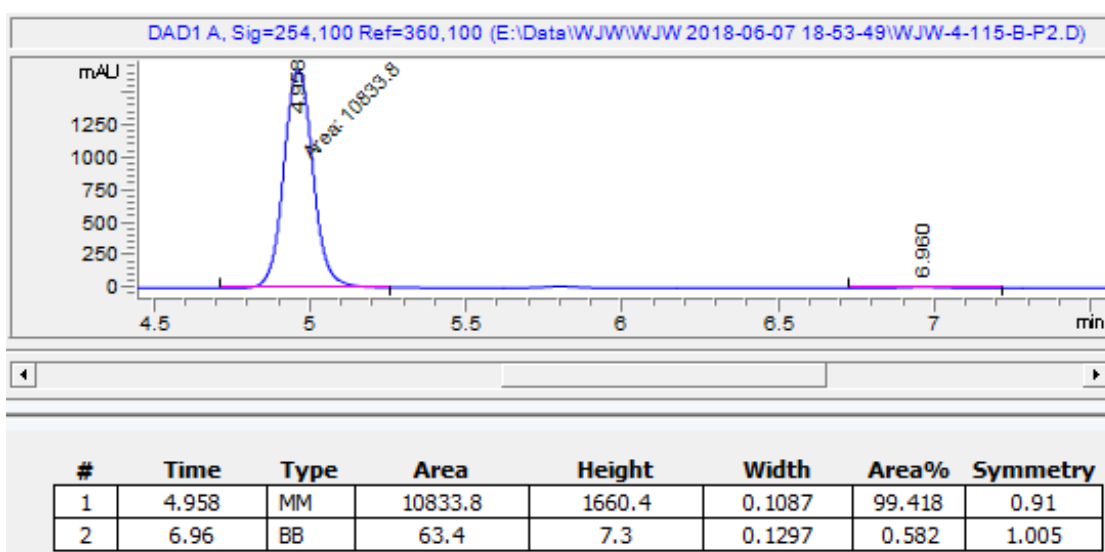

(S)-2-(3,5-dimethoxyphenyl)-4-ethyl-4-((R)-5-methyl-3-oxo-1-phenyl-2-((R)-2-phenylvinylidene)hexyl)oxazol-5(4H)-one (**3u**)

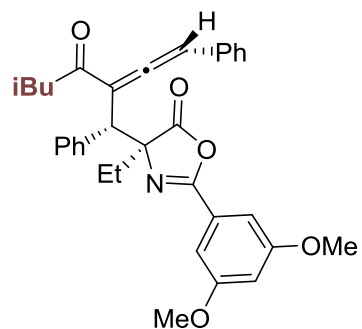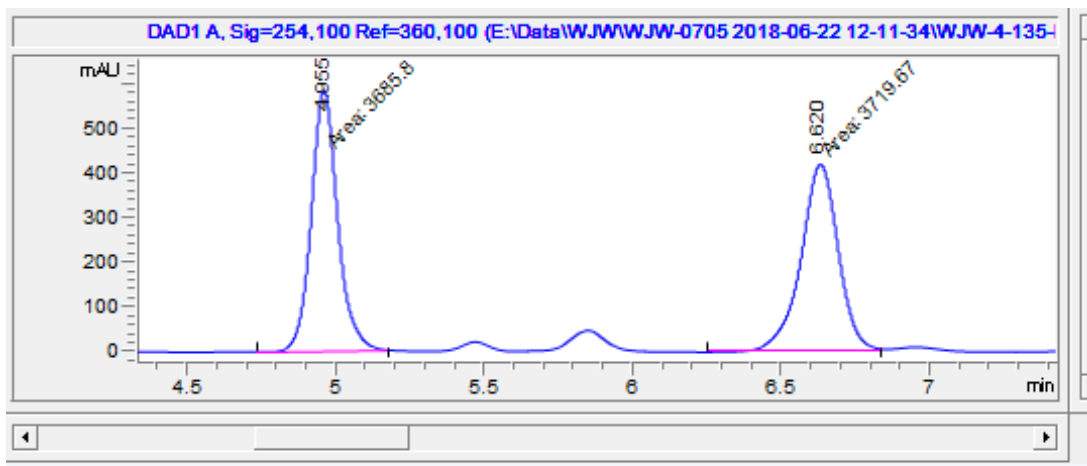

| # | Time  | Type | Area   | Height | Width  | Area%  | Symmetry |
|---|-------|------|--------|--------|--------|--------|----------|
| 1 | 4.955 | MM   | 3685.8 | 589.2  | 0.1043 | 49.771 | 0.883    |
| 2 | 6.62  | MM   | 3719.7 | 422.2  | 0.1468 | 50.229 | 1.075    |

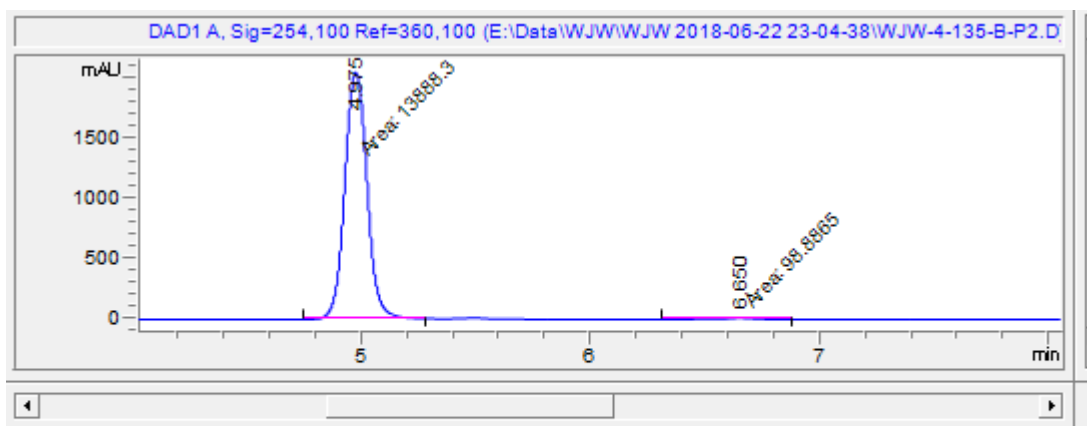

| # | Time  | Type | Area    | Height | Width  | Area%  | Symmetry |
|---|-------|------|---------|--------|--------|--------|----------|
| 1 | 4.975 | MM   | 13888.3 | 2049.9 | 0.1129 | 99.293 | 0.942    |
| 2 | 6.65  | MM   | 98.9    | 10     | 0.1643 | 0.707  | 1.416    |

(S)-4-((1*R*,3*R*)-2-acetyl-1,4-diphenylbuta-2,3-dien-1-yl)-4-butyl-2-(3,5-dimethoxyphenyl)oxazol-5(4*H*)

-one (**3v**)

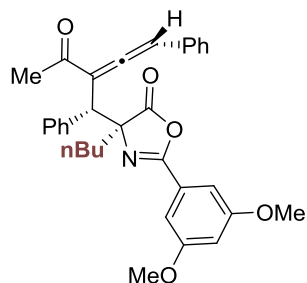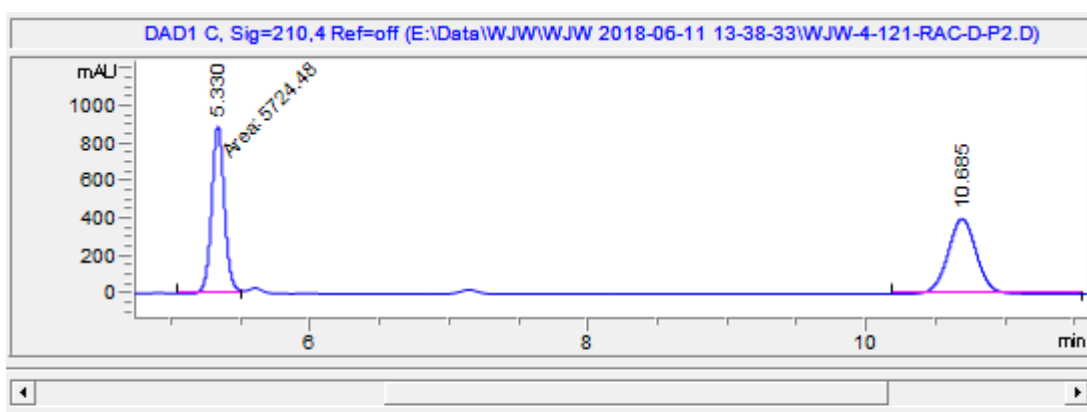

| # | Time   | Type | Area   | Height | Width  | Area%  | Symmetry |
|---|--------|------|--------|--------|--------|--------|----------|
| 1 | 5.33   | MF   | 5724.5 | 887.7  | 0.1075 | 50.021 | 0.924    |
| 2 | 10.685 | BB   | 5719.7 | 399    | 0.2197 | 49.979 | 0.974    |

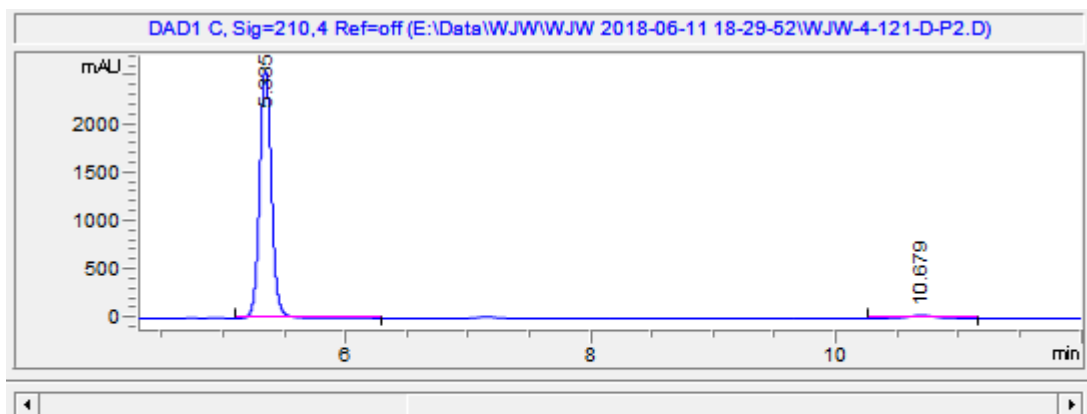

| # | Time   | Type | Area    | Height | Width  | Area%  | Symmetry |
|---|--------|------|---------|--------|--------|--------|----------|
| 1 | 5.335  | BV R | 17466.7 | 2576   | 0.1051 | 97.485 | 0.893    |
| 2 | 10.679 | BB   | 450.6   | 31.5   | 0.1846 | 2.515  | 0.986    |

(S)-4-((1*R*,3*R*)-2-acetyl-1,4-diphenylbuta-2,3-dien-1-yl)-4-benzyl-2-(3,5-dimethoxyphenyl)oxazol-5(4

H)-one (**3w**)

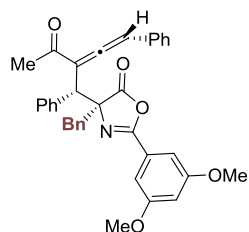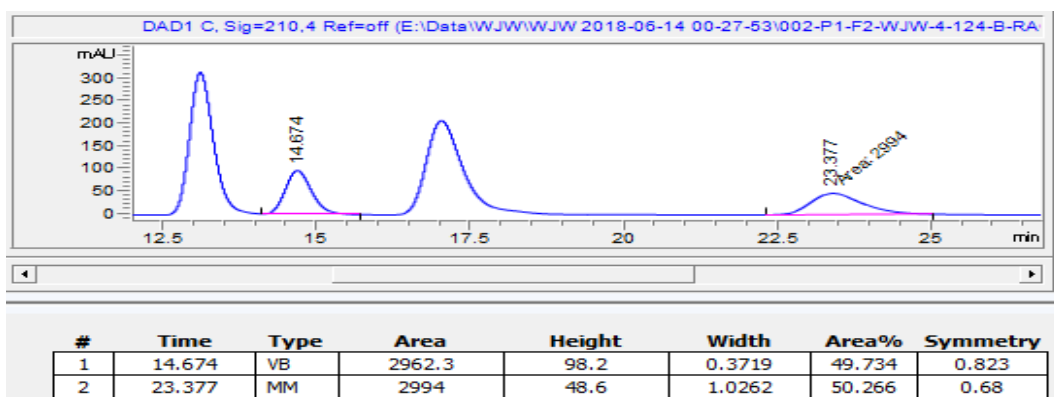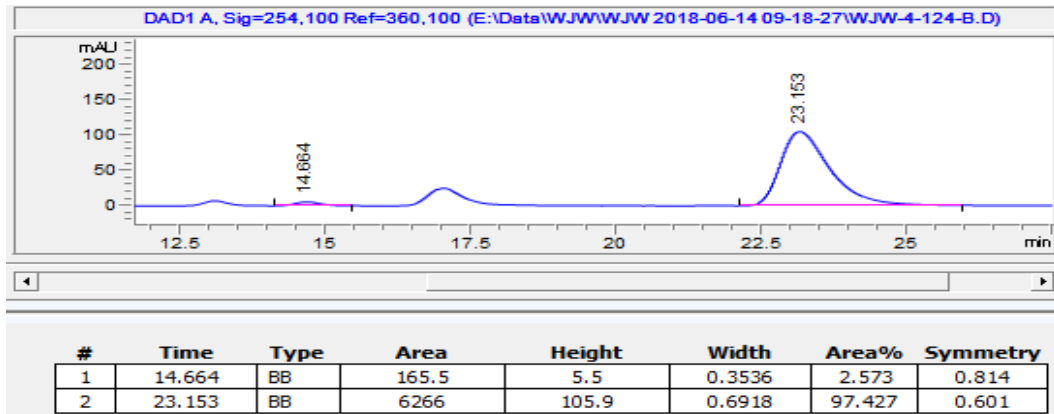

The minor diastereomer:

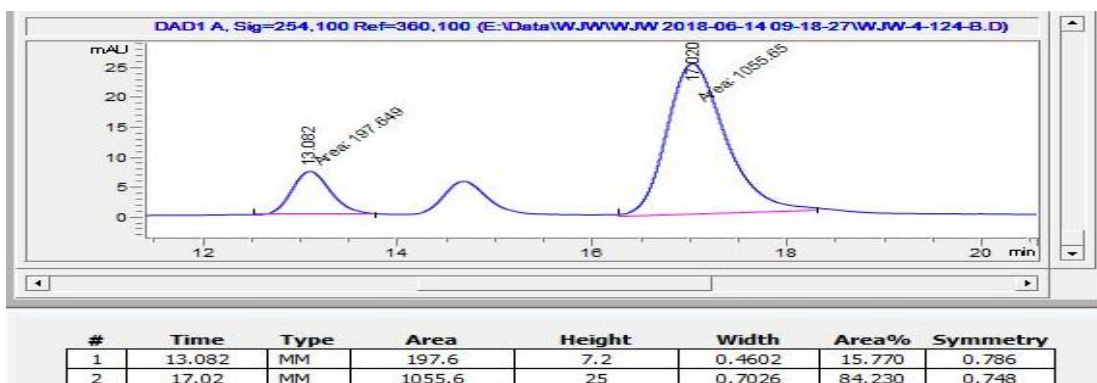

(S)-4-((1*R*,3*R*)-2-acetyl-1,4-diphenylbuta-2,3-dien-1-yl)-2-(3,5-dimethoxyphenyl)-4-(2-(methylthio)ethyl)oxazol-5(4H)-one (**3x**)

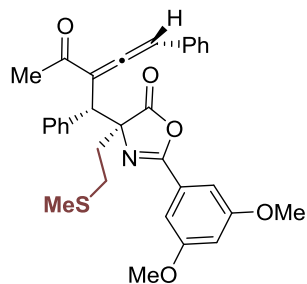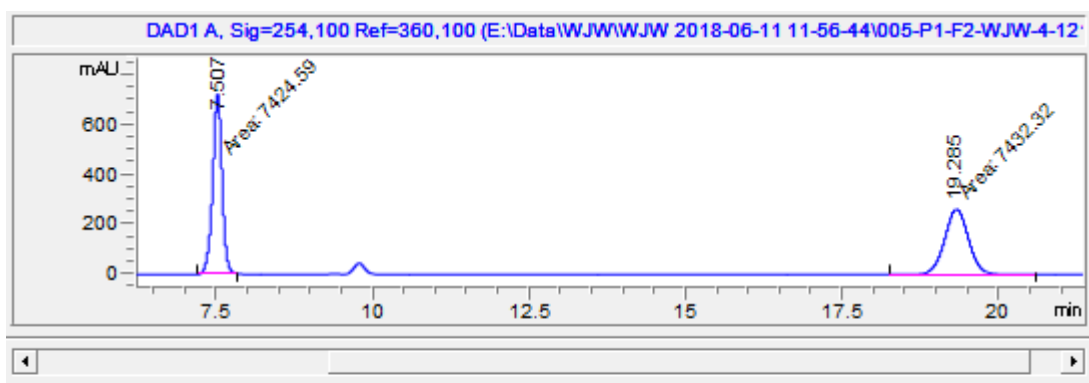

| # | Time   | Type | Area   | Height | Width  | Area%  | Symmetry |
|---|--------|------|--------|--------|--------|--------|----------|
| 1 | 7.507  | MM   | 7424.6 | 721.2  | 0.1716 | 49.974 | 1.052    |
| 2 | 19.285 | MM   | 7432.3 | 266.2  | 0.4653 | 50.026 | 0.983    |

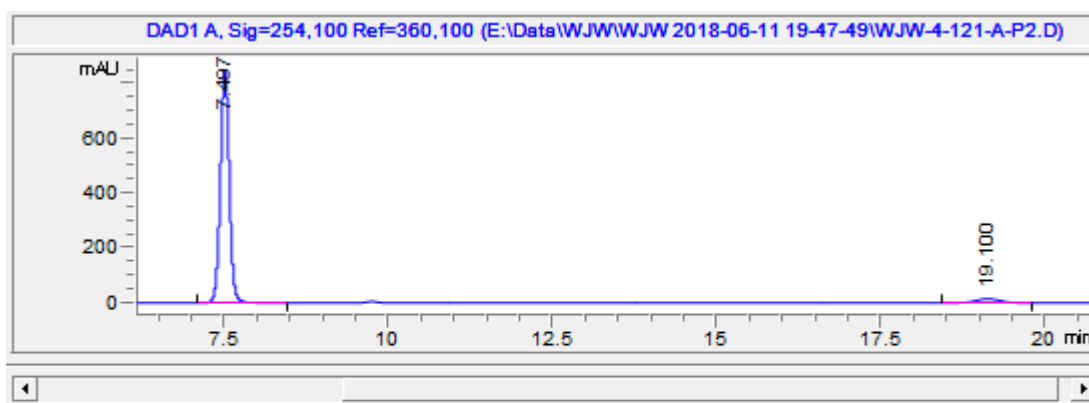

| # | Time  | Type | Area   | Height | Width  | Area%  | Symmetry |
|---|-------|------|--------|--------|--------|--------|----------|
| 1 | 7.497 | BB   | 8067.1 | 852.6  | 0.1459 | 95.263 | 0.952    |
| 2 | 19.1  | BB   | 401.1  | 15.5   | 0.3035 | 4.737  | 1.004    |

tert-butyl-4-((S)-4-((1*R*,3*R*)-2-acetyl-1,4-diphenylbuta-2,3-dien-1-yl)-2-(3,5-dimethoxyphenyl)-5-oxo-4,5-dihydrooxazol-4-yl)butyl)carbamate (**3y**)

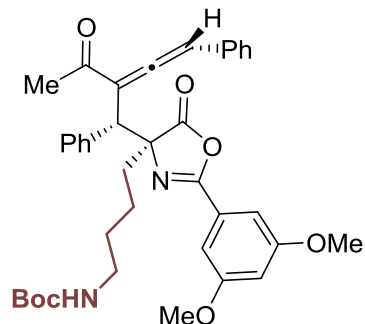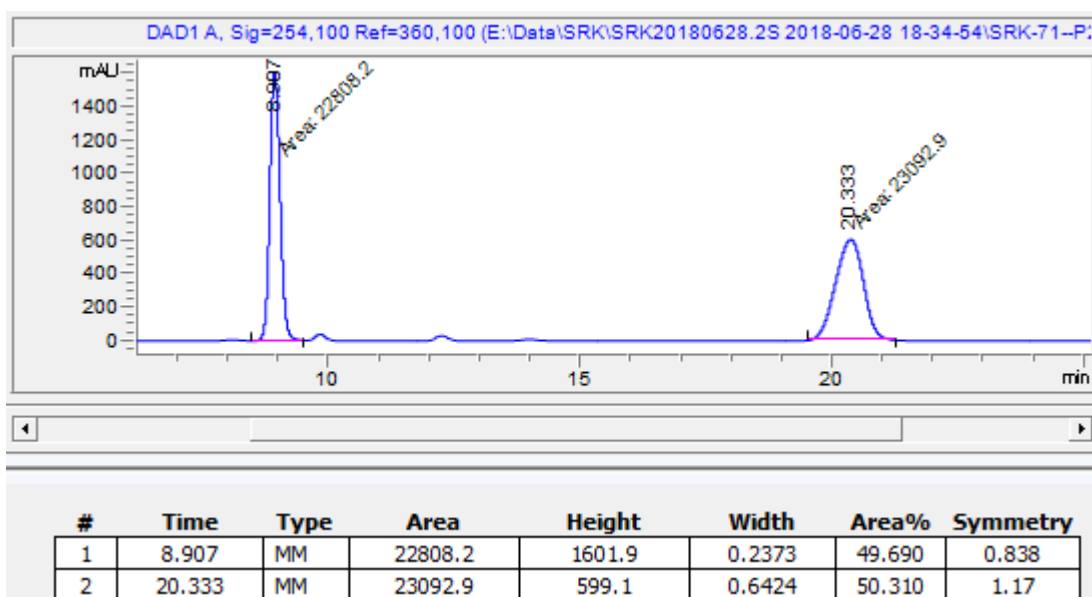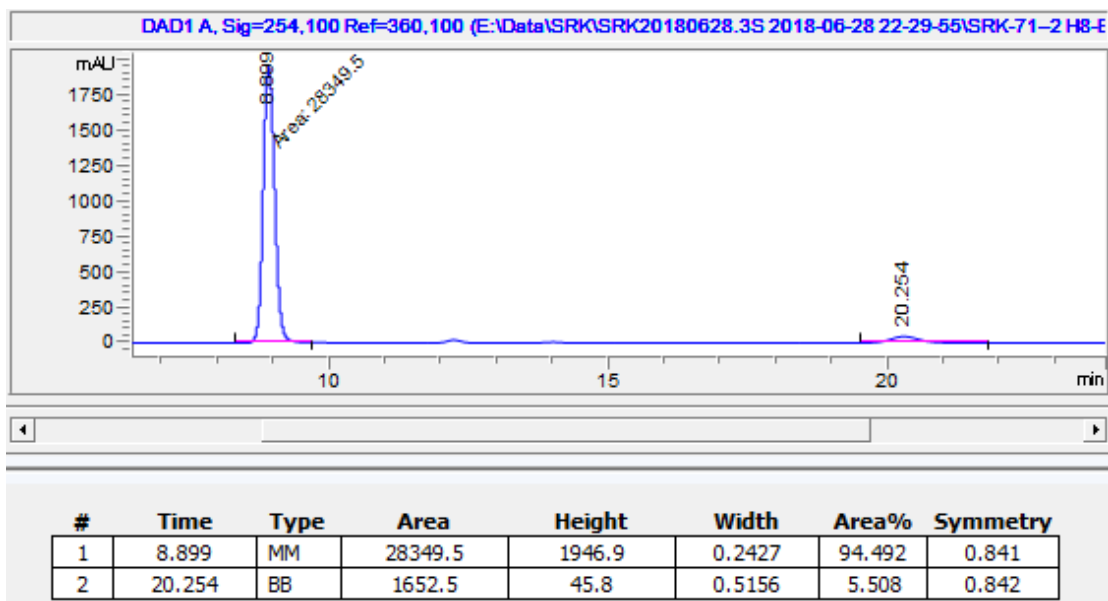



(S)-4-((1*R*,3*S*)-2-acetyl-1,4-diphenylbuta-2,3-dien-1-yl)-2-(3,5-dimethoxyphenyl)-4-ethylloxazol-5(4H)

-one (4a)

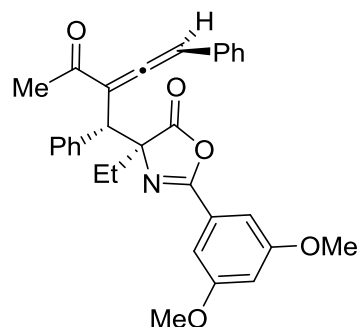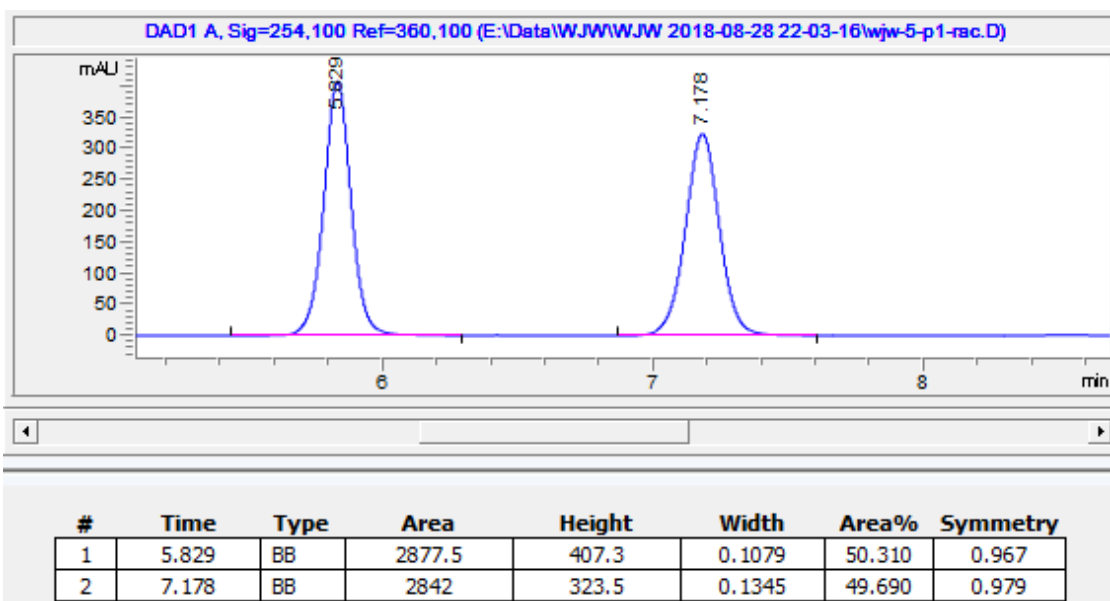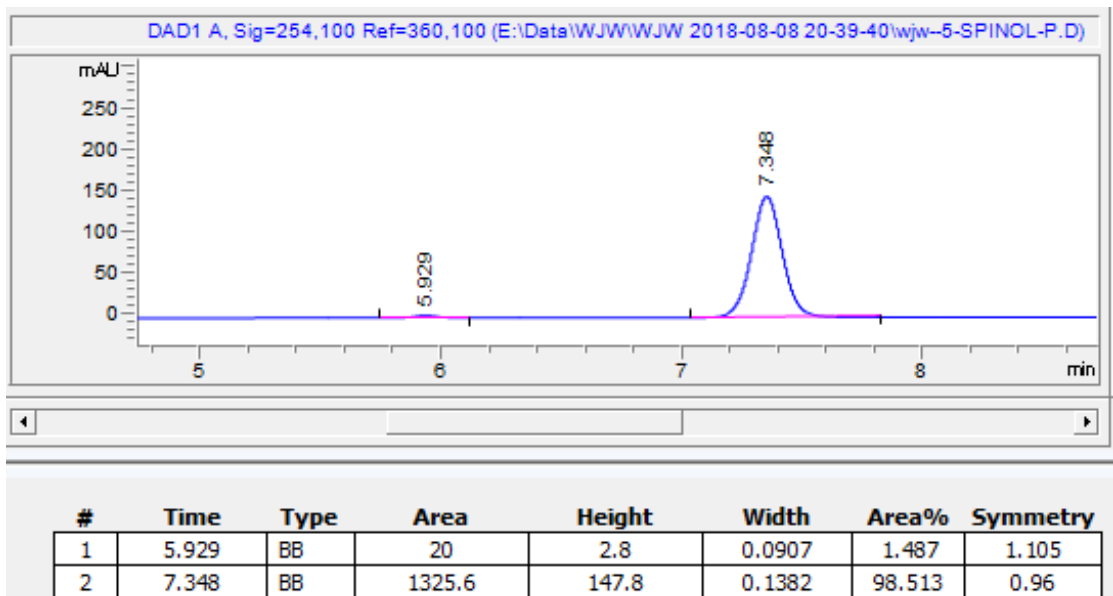

(S)-4-((1*R*,3*S*)-2-acetyl-1-phenyl-4-(p-tolyl)buta-2,3-dien-1-yl)-2-(3,5-dimethoxyphenyl)-4-ethyloxazol-5(4*H*)-one (**4b**)

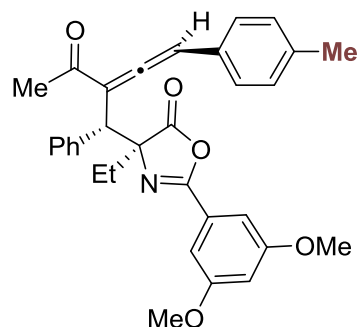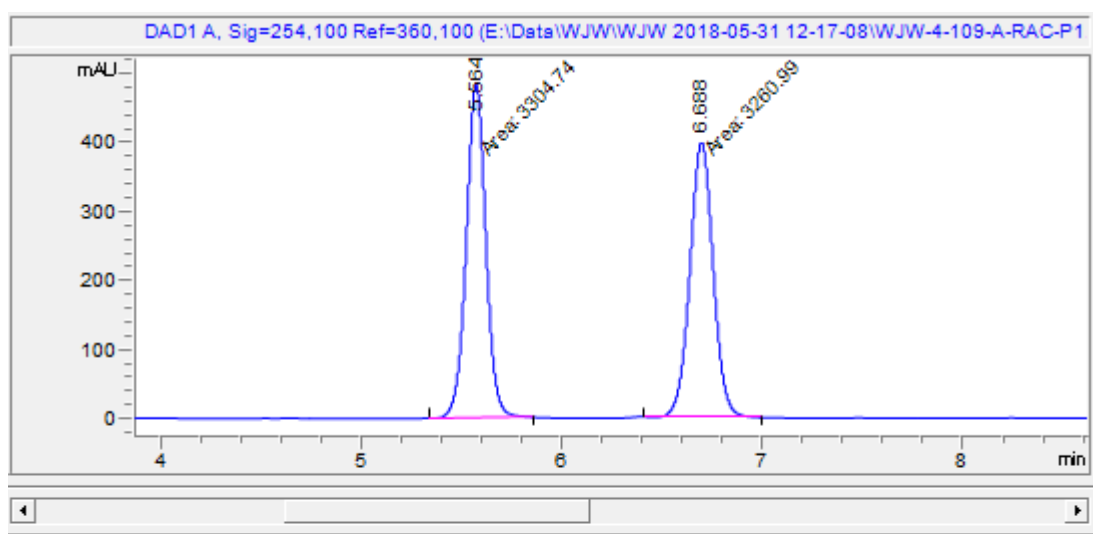

| # | Time  | Type | Area   | Height | Width | Area%  | Symmetry |
|---|-------|------|--------|--------|-------|--------|----------|
| 1 | 5.564 | FM   | 3304.7 | 483.1  | 0.114 | 50.333 | 0.964    |
| 2 | 6.688 | MF   | 3261   | 399.7  | 0.136 | 49.667 | 0.97     |

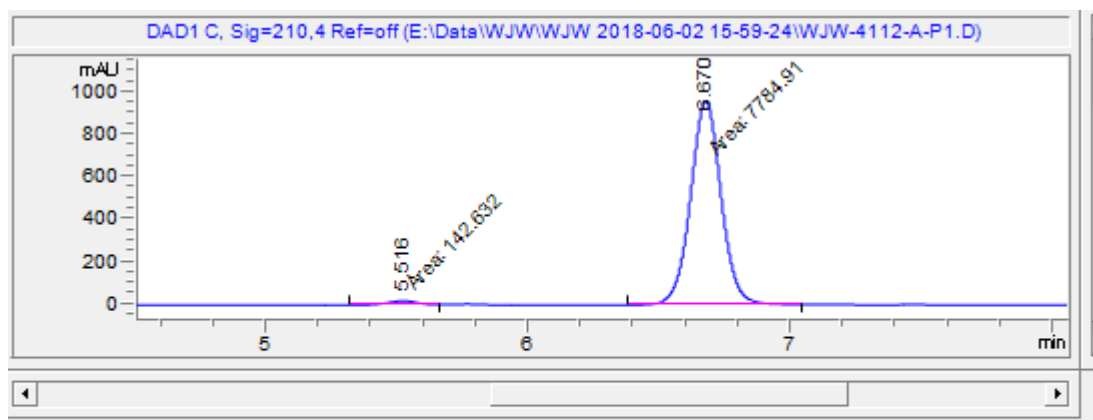

| # | Time  | Type | Area   | Height | Width  | Area%  | Symmetry |
|---|-------|------|--------|--------|--------|--------|----------|
| 1 | 5.516 | MM   | 142.6  | 19.3   | 0.1234 | 1.799  | 1.145    |
| 2 | 6.67  | MM   | 7784.9 | 959.9  | 0.1352 | 98.201 | 0.968    |

(S)-4-((1*R*,3*S*)-2-acetyl-4-(4-chlorophenyl)-1-phenylbuta-2,3-dien-1-yl)-2-(3,5-dimethoxyphenyl)-4-ethyloxazol-5(4H)-one (**4c**)

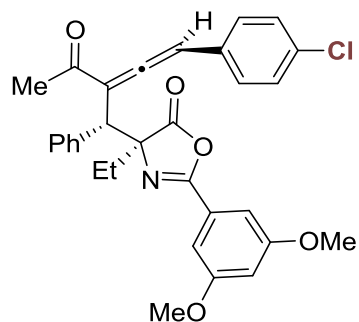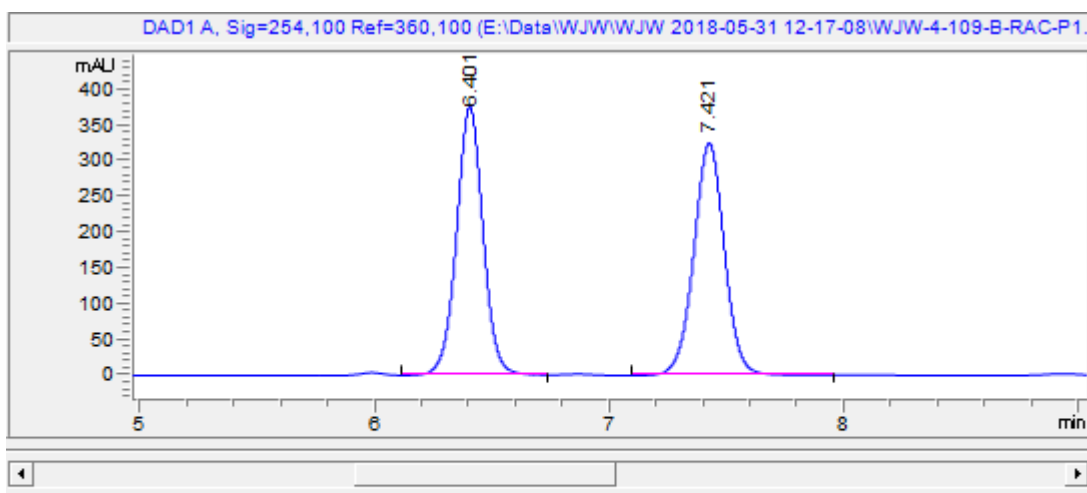

| # | Time  | Type | Area   | Height | Width  | Area%  | Symmetry |
|---|-------|------|--------|--------|--------|--------|----------|
| 1 | 6.401 | BB   | 2948.9 | 376.1  | 0.1205 | 49.892 | 0.975    |
| 2 | 7.421 | BB   | 2961.7 | 325.7  | 0.1401 | 50.108 | 0.991    |

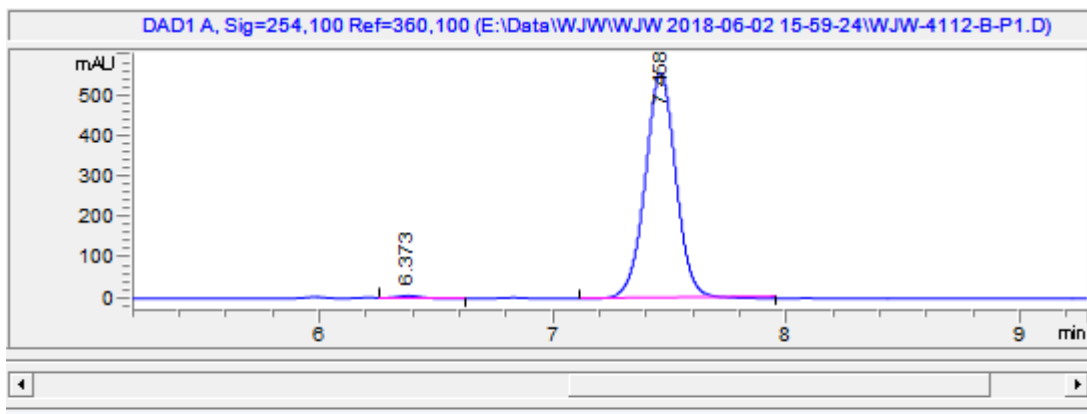

| # | Time  | Type | Area   | Height | Width  | Area%  | Symmetry |
|---|-------|------|--------|--------|--------|--------|----------|
| 1 | 6.373 | VB   | 59.1   | 7.4    | 0.116  | 1.127  | 1.005    |
| 2 | 7.458 | BB   | 5186.5 | 562.5  | 0.1411 | 98.873 | 0.983    |

(S)-4-((1*R*,3*S*)-2-acetyl-4-(4-methoxyphenyl)-1-phenylbuta-2,3-dien-1-yl)-2-(3,5-dimethoxyphenyl)-4-ethyloxazol-5(4*H*)-one (**4d**)

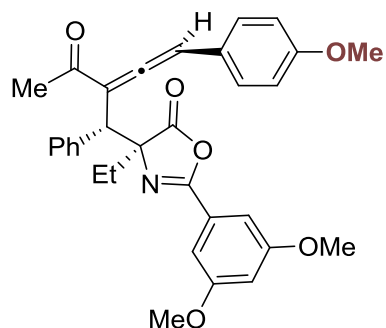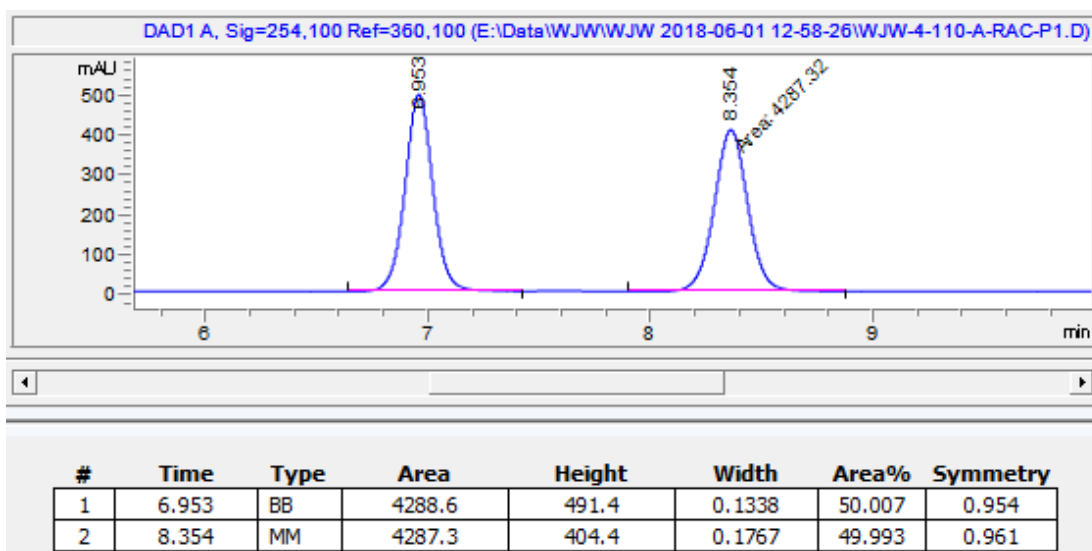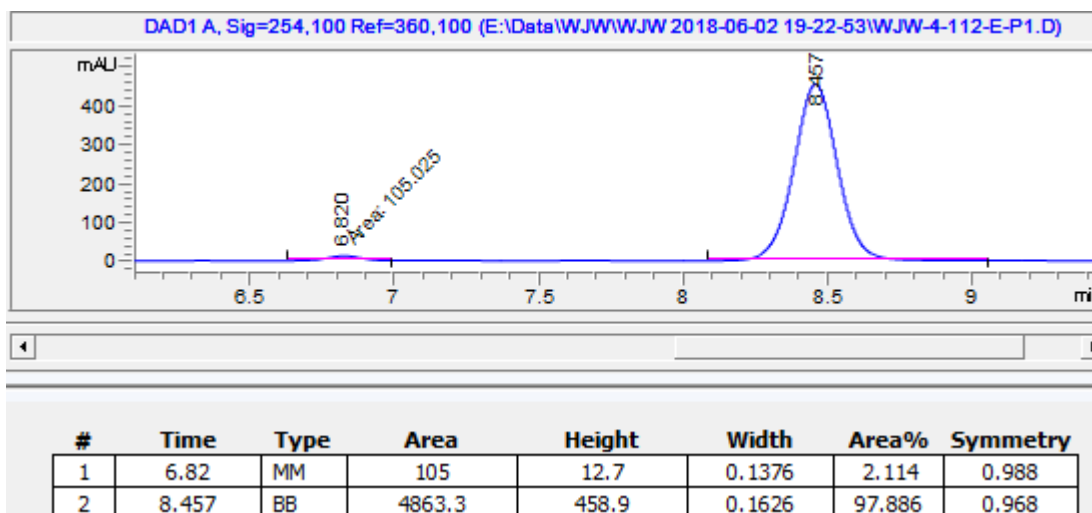

(S)-4-((1*R*,3*S*)-2-acetyl-4-(4-fluorophenyl)-1-phenylbuta-2,3-dien-1-yl)-2-(3,5-dimethoxyphenyl)-4-ethyloxazol-5(4*H*)-one (**4e**)

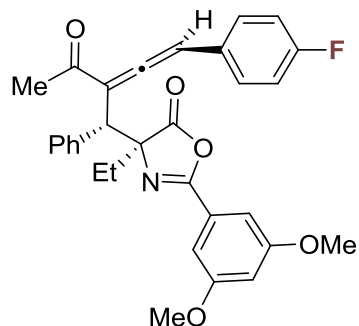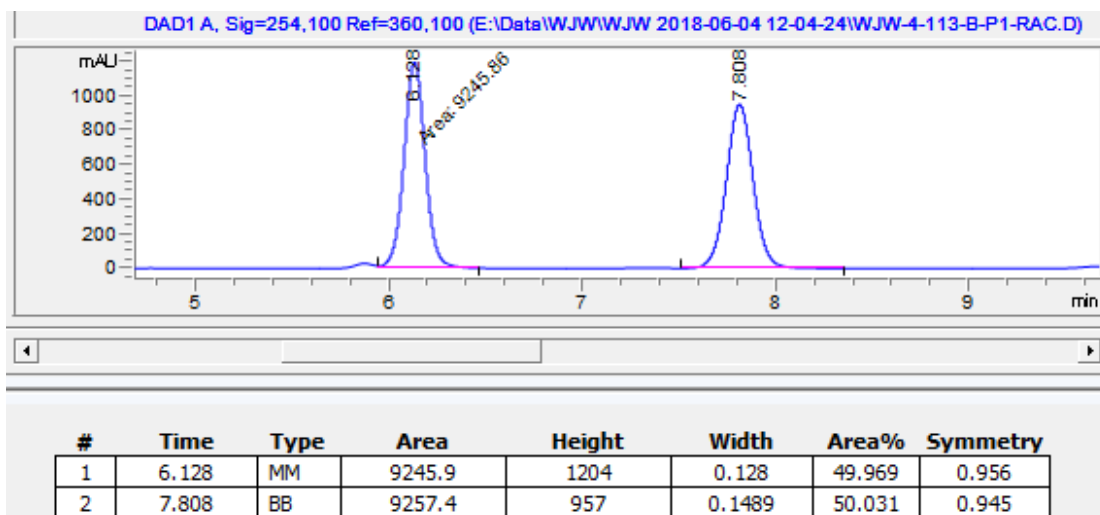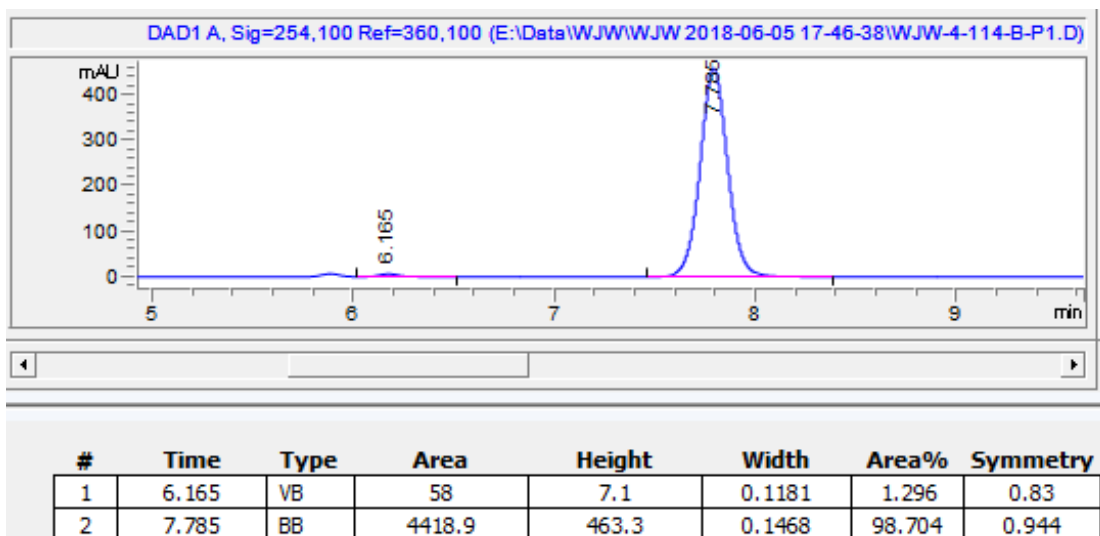

(S)-4-((1*R*,3*S*)-2-acetyl-1-phenyl-4-(4-(trifluoromethyl)phenyl)buta-2,3-dien-1-yl)-2-(3,5-dimethoxyphenyl)-4-ethyloxazol-5(4H)-one (**4f**)

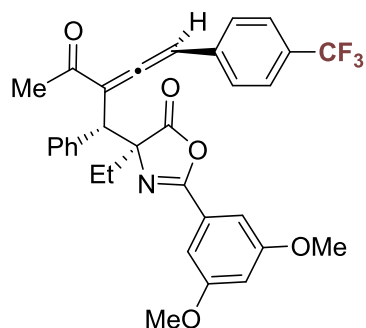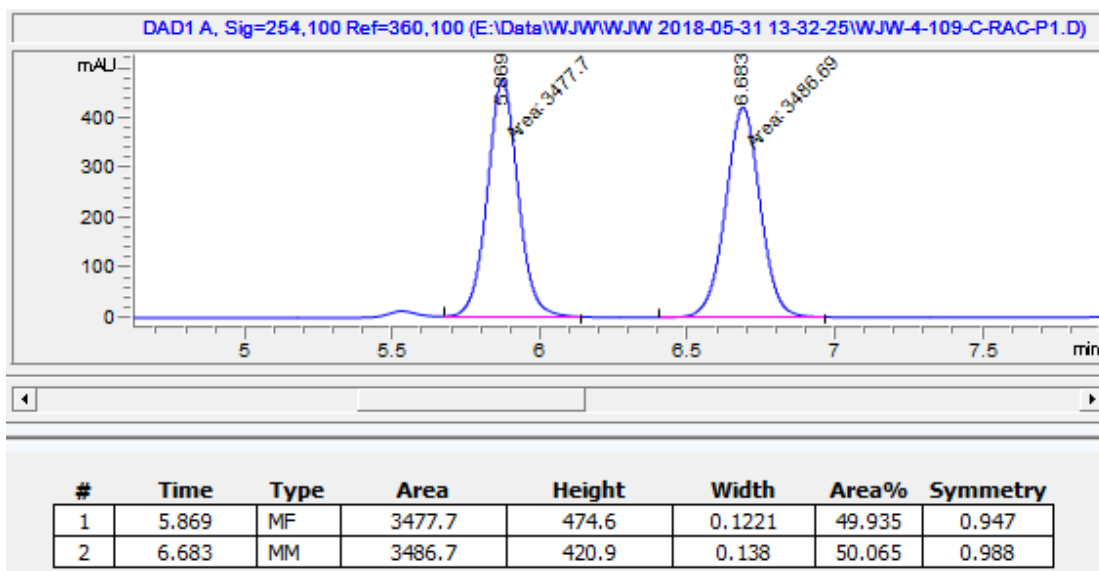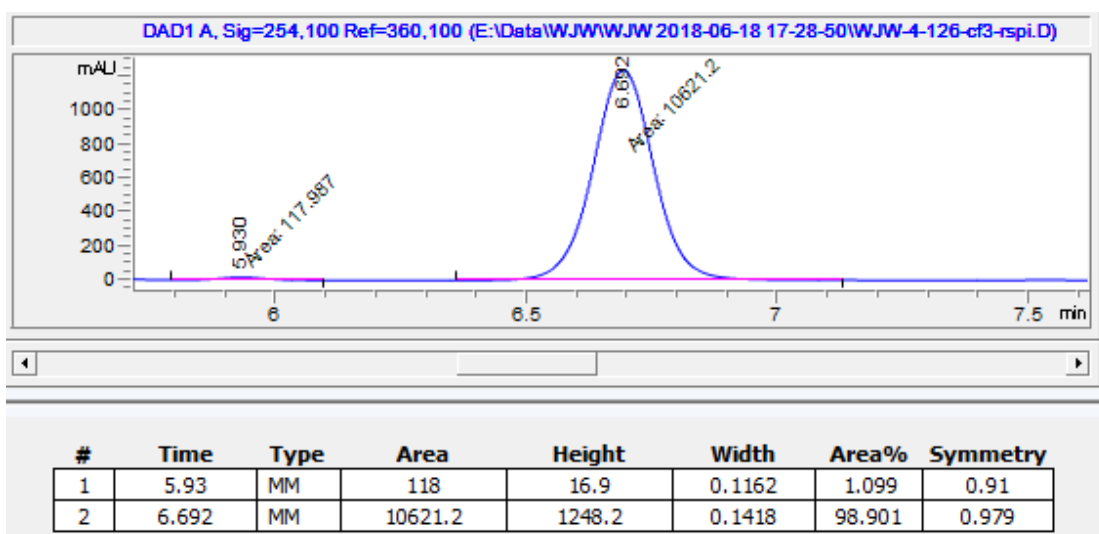

Methyl-3-((S)-3-((R)-((S)-2-(3,5-dimethoxyphenyl)-4-ethyl-5-oxo-4,5-dihydrooxazol-4-yl)(phenyl)methyl)-4-oxopenta-1,2-dien-1-yl)benzoate (**4g**)

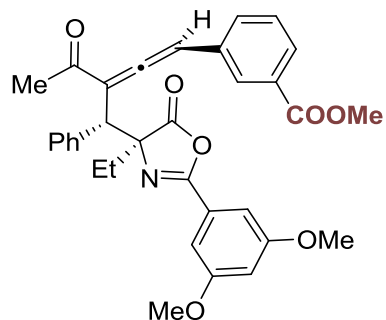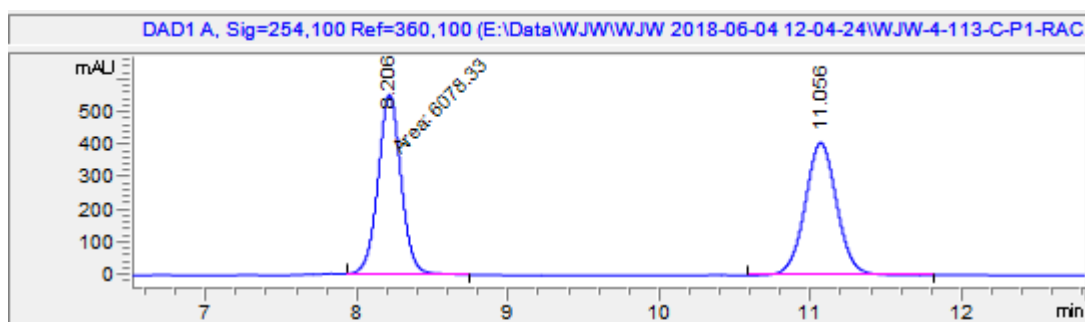

| # | Time   | Type | Area   | Height | Width  | Area%  | Symmetry |
|---|--------|------|--------|--------|--------|--------|----------|
| 1 | 8.206  | MF   | 6078.3 | 563    | 0.1799 | 50.220 | 0.943    |
| 2 | 11.056 | BB   | 6025   | 412.9  | 0.2247 | 49.780 | 0.946    |

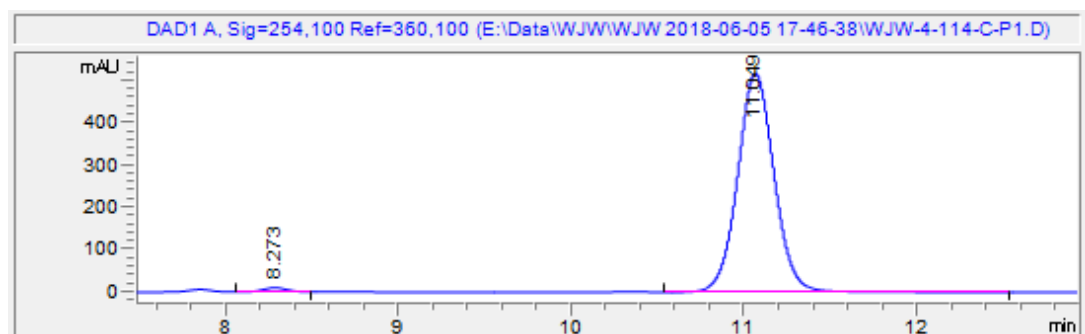

| # | Time   | Type | Area   | Height | Width  | Area%  | Symmetry |
|---|--------|------|--------|--------|--------|--------|----------|
| 1 | 8.273  | BB   | 100.8  | 10.1   | 0.152  | 1.300  | 0.993    |
| 2 | 11.049 | BB   | 7656.3 | 523    | 0.2253 | 98.700 | 0.919    |

(S)-4-((1*R*,3*S*)-2-acetyl-4-(2-chlorophenyl)-1-phenylbuta-2,3-dien-1-yl)-2-(3,5-dimethoxyphenyl)-4-ethyloxazol-5(4*H*)-one (**4h**)

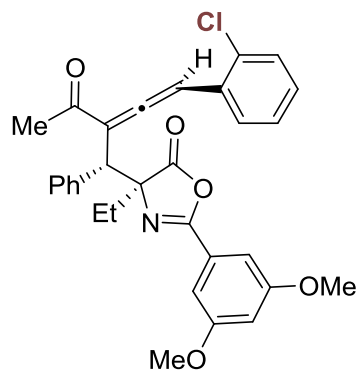

| # | Time   | Type | Area   | Height | Width  | Area%  | Symmetry |
|---|--------|------|--------|--------|--------|--------|----------|
| 1 | 15.515 | MM   | 1990.6 | 69.8   | 0.4755 | 23.897 | 0.843    |
| 2 | 16.79  | MM   | 2176.2 | 66.5   | 0.5451 | 26.126 | 0.829    |
| 3 | 25.525 | MM   | 2181.4 | 44.9   | 0.8097 | 26.187 | 0.819    |
| 4 | 27.946 | MM   | 1981.6 | 35.1   | 0.9402 | 23.790 | 0.804    |

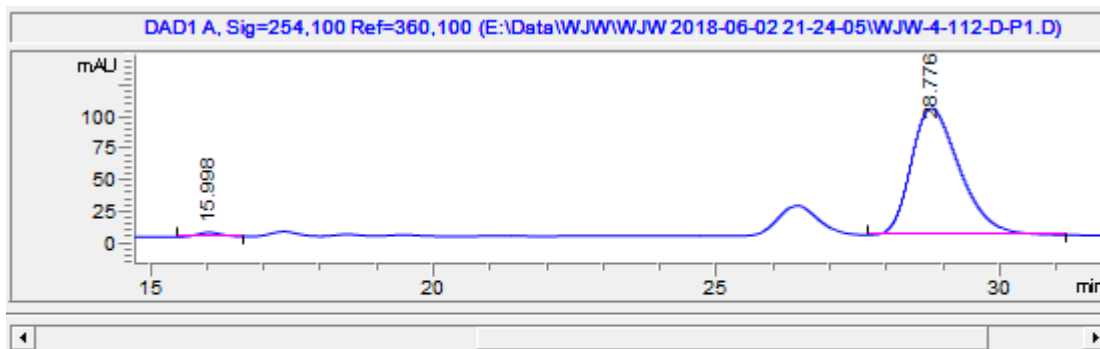

| # | Time   | Type | Area   | Height | Width  | Area%  | Symmetry |
|---|--------|------|--------|--------|--------|--------|----------|
| 1 | 15.998 | BB   | 102.1  | 3.5    | 0.3422 | 1.665  | 0.918    |
| 2 | 28.776 | BB   | 6028.6 | 101.4  | 0.6974 | 98.335 | 0.681    |



(S)-4-((1*R*,3*S*)-2-acetyl-1-phenyl-4-(thiophen-3-yl)buta-2,3-dien-1-yl)-2-(3,5-dimethoxyphenyl)-4-ethylloxazol-5(4H)-one (**4i**)

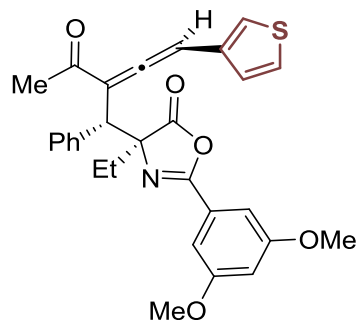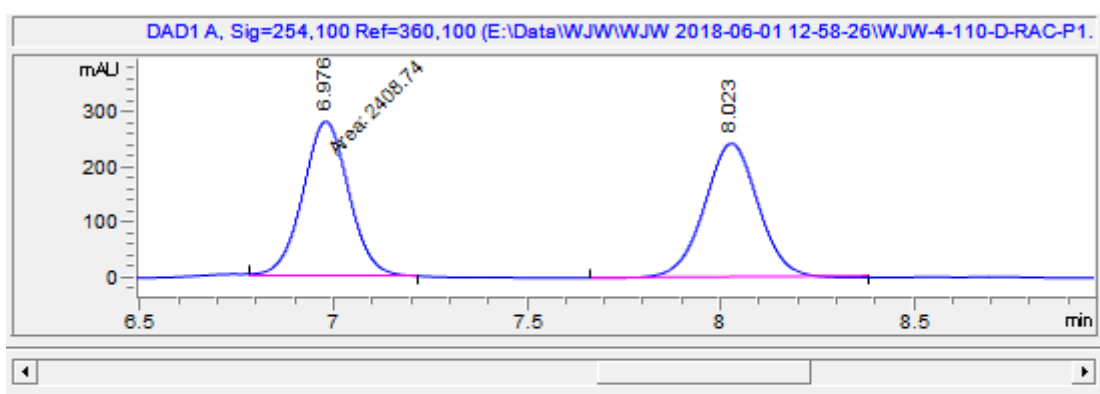

| # | Time  | Type | Area   | Height | Width  | Area%  | Symmetry |
|---|-------|------|--------|--------|--------|--------|----------|
| 1 | 6.976 | MM   | 2408.7 | 285.8  | 0.1405 | 50.048 | 0.974    |
| 2 | 8.023 | BB   | 2404.1 | 246.6  | 0.1492 | 49.952 | 0.977    |

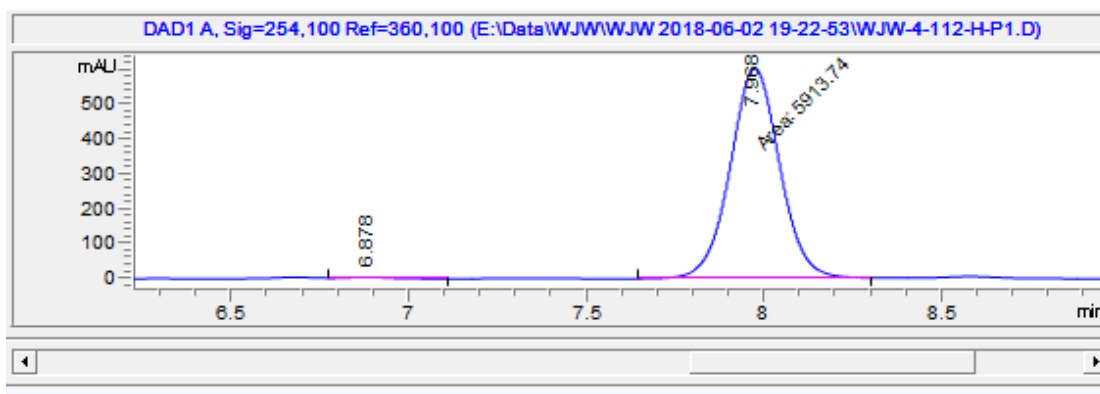

| # | Time  | Type | Area   | Height | Width  | Area%  | Symmetry |
|---|-------|------|--------|--------|--------|--------|----------|
| 1 | 6.878 | VB   | 35.4   | 4.2    | 0.1209 | 0.596  | 0.991    |
| 2 | 7.968 | MM   | 5913.7 | 608.8  | 0.1619 | 99.404 | 0.975    |

(S)-4-((1*R*,3*S*)-2-acetyl-4-(cyclohex-1-en-1-yl)-1-phenylbuta-2,3-dien-1-yl)-2-(3,5-dimethoxyphenyl)-4-ethyloxazol-5(4H)-one (**4j**)

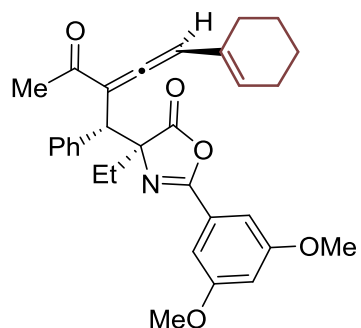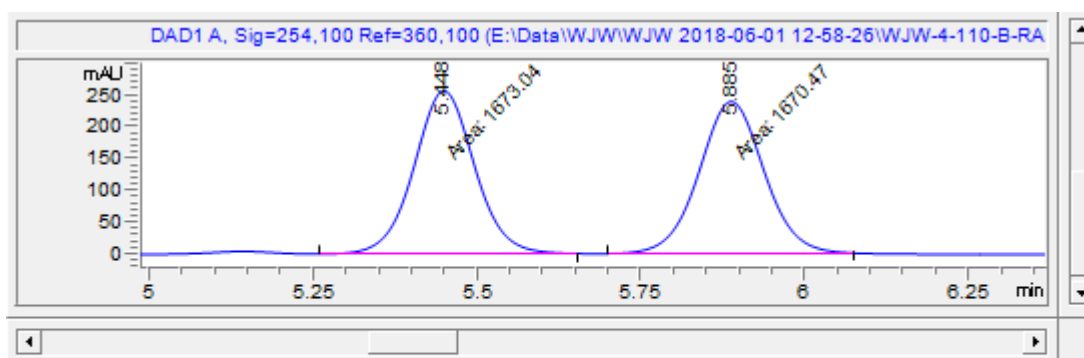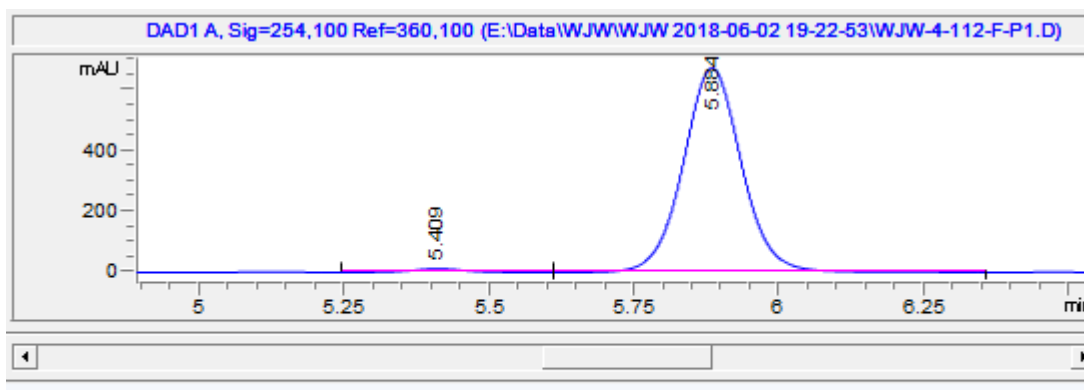

(S)-4-((1*R*,3*S*)-2-acetyl-1-phenylocta-2,3-dien-1-yl)-2-(3,5-dimethoxyphenyl)-4-ethylloxazol-5(4*H*)-one

(4k)

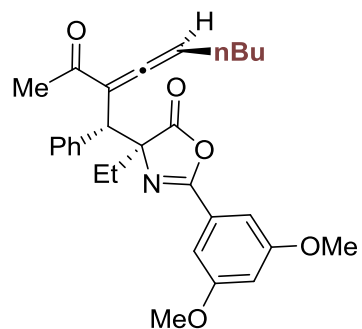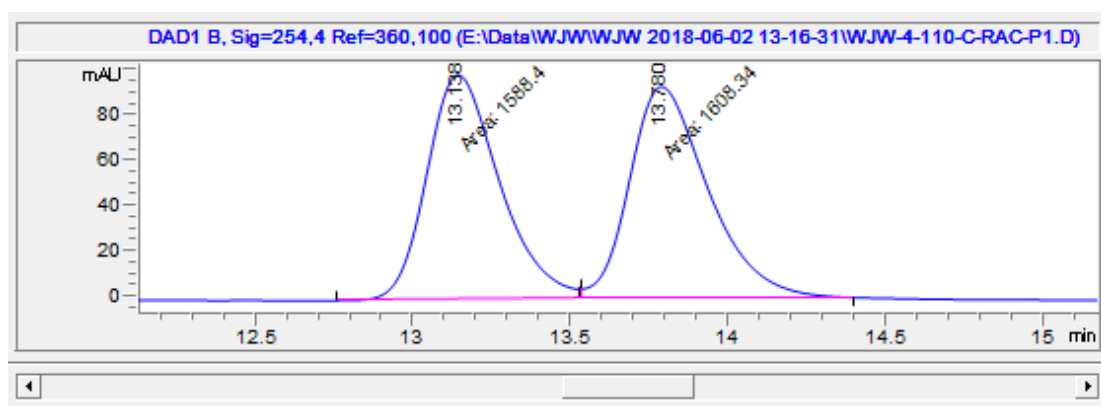

| # | Time   | Type | Area   | Height | Width  | Area%  | Symmetry |
|---|--------|------|--------|--------|--------|--------|----------|
| 1 | 13.138 | MF   | 1588.4 | 99     | 0.2675 | 49.688 | 0.731    |
| 2 | 13.78  | FM   | 1608.3 | 93.2   | 0.2875 | 50.312 | 0.669    |

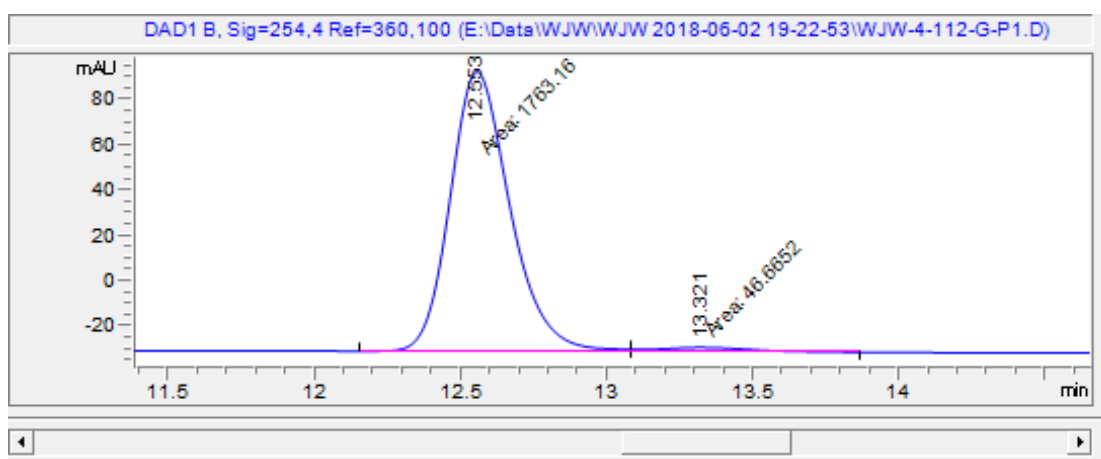

| # | Time   | Type | Area   | Height | Width  | Area%  | Symmetry |
|---|--------|------|--------|--------|--------|--------|----------|
| 1 | 12.553 | MF   | 1763.2 | 123.5  | 0.2379 | 97.422 | 0.787    |
| 2 | 13.321 | FM   | 46.7   | 2      | 0.3947 | 2.578  | 0.781    |

(S)-4-((1*R*,3*S*)-2-acetyl-4-phenyl-1-(p-tolyl)buta-2,3-dien-1-yl)-2-(3,5-dimethoxyphenyl)-4-ethyloxazol-5(4H)-one (**4l**)

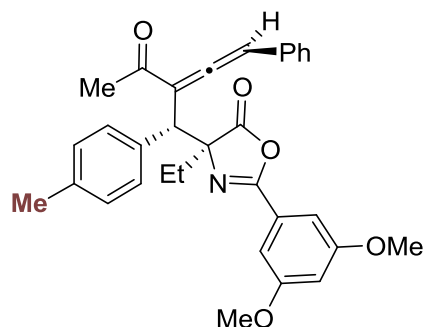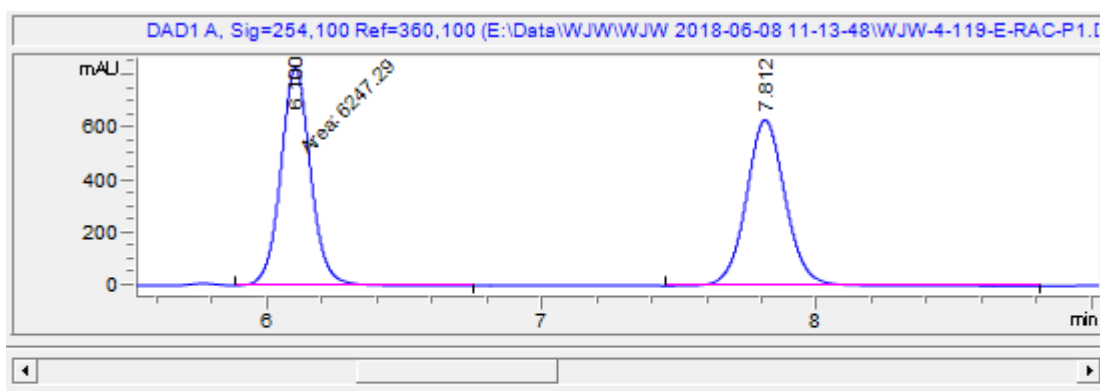

| # | Time  | Type | Area   | Height | Width  | Area%  | Symmetry |
|---|-------|------|--------|--------|--------|--------|----------|
| 1 | 6.1   | FM   | 6247.3 | 824    | 0.1264 | 50.167 | 0.924    |
| 2 | 7.812 | BB   | 6205.7 | 627    | 0.1515 | 49.833 | 0.904    |

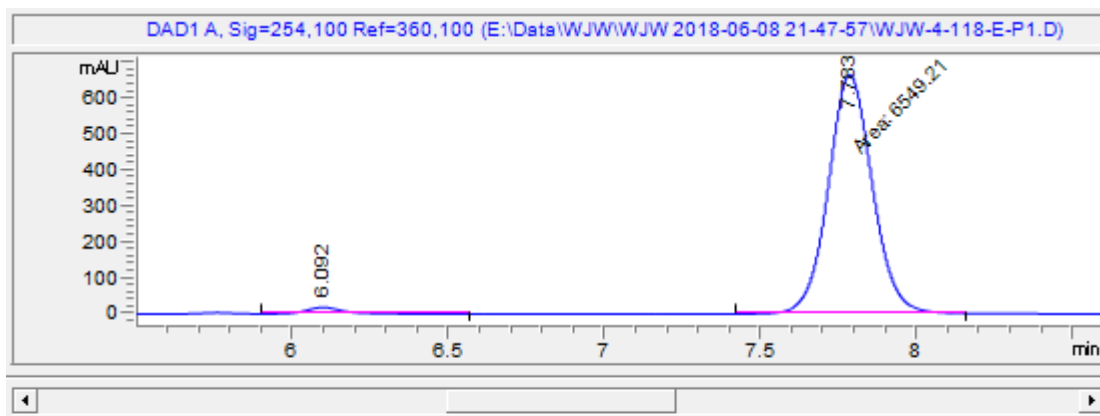

| # | Time  | Type | Area   | Height | Width  | Area%  | Symmetry |
|---|-------|------|--------|--------|--------|--------|----------|
| 1 | 6.092 | BB   | 148.5  | 18.1   | 0.1221 | 2.218  | 0.769    |
| 2 | 7.783 | MF   | 6549.2 | 662.5  | 0.1648 | 97.782 | 0.915    |

(S)-4-((1*R*,3*S*)-2-acetyl-1-(4-fluorophenyl)-4-phenylbuta-2,3-dien-1-yl)-2-(3,5-dimethoxyphenyl)-4-ethyloxazol-5(4*H*)-one (**4m**)

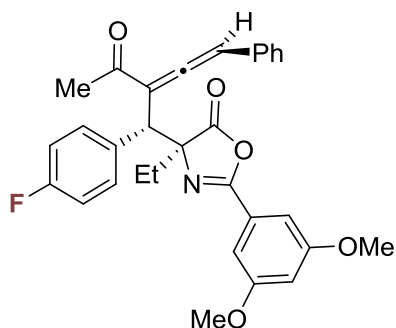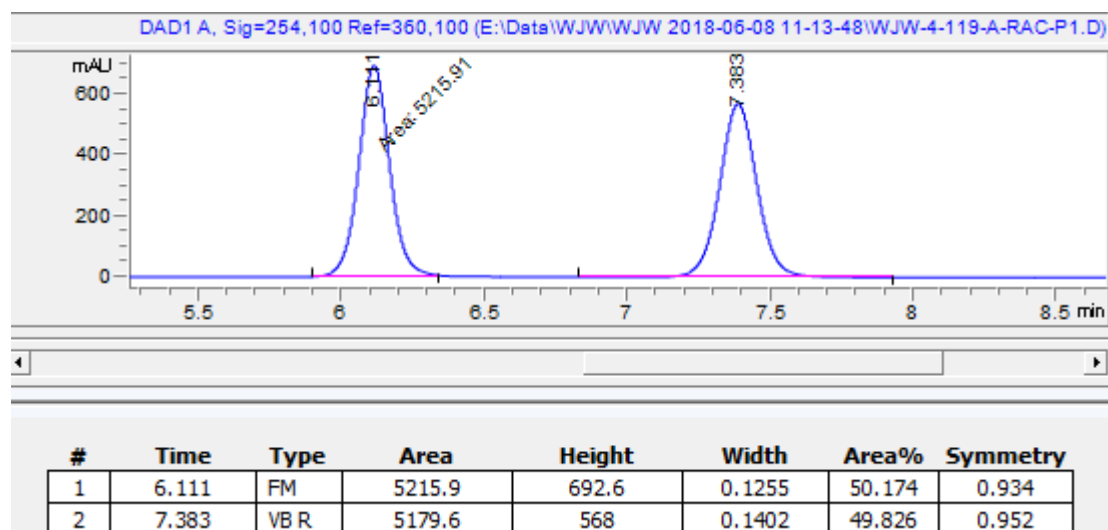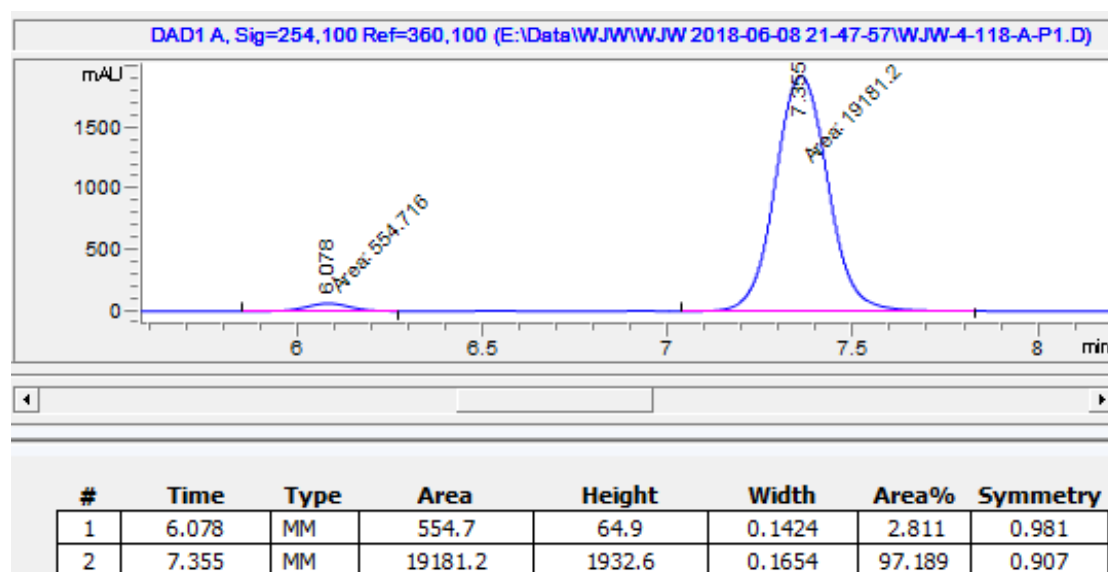

(S)-4-((1*R*,3*S*)-2-acetyl-1-(4-chlorophenyl)-4-phenylbuta-2,3-dien-1-yl)-2-(3,5-dimethoxyphenyl)-4-ethyloxazol-5(4*H*)-one (**4n**)

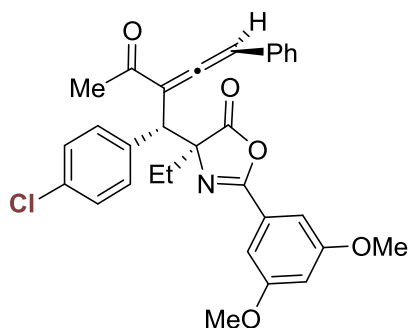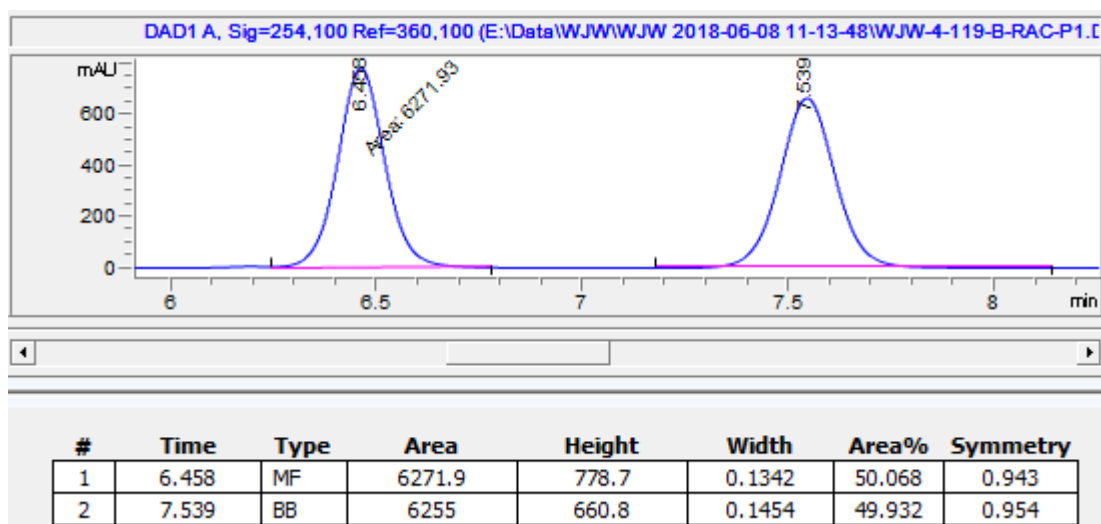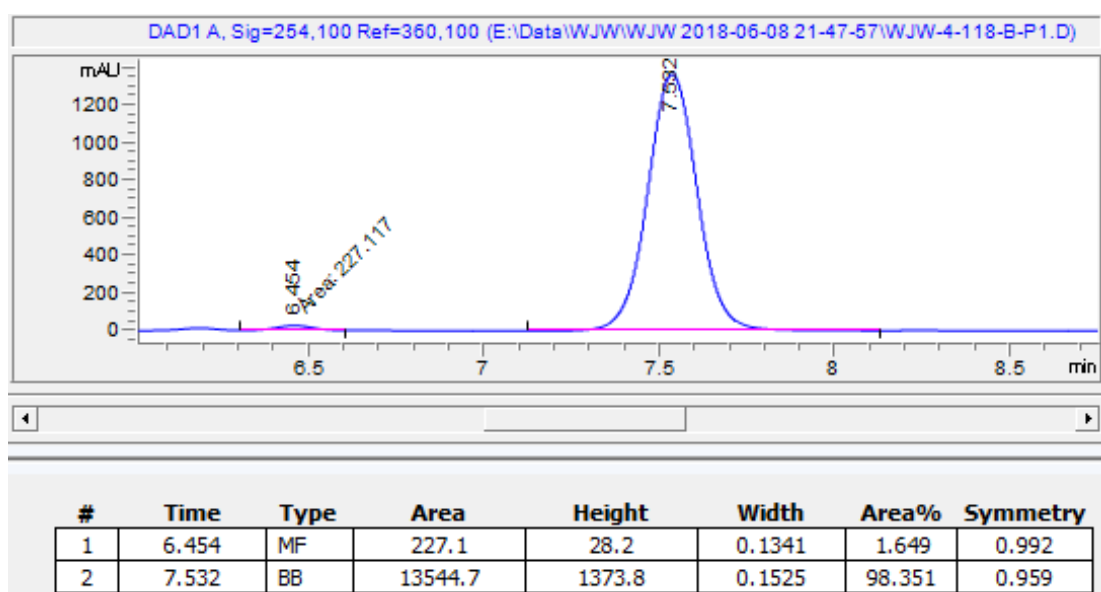

(S)-4-((1*R*,3*S*)-2-acetyl-1-(4-methoxyphenyl)-4-phenylbuta-2,3-dien-1-yl)-2-(3,5-dimethoxyphenyl)-4-ethyloxazol-5(4H)-one (**4o**)

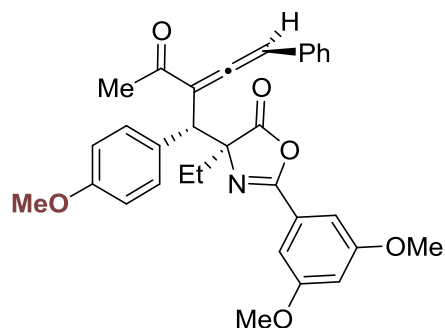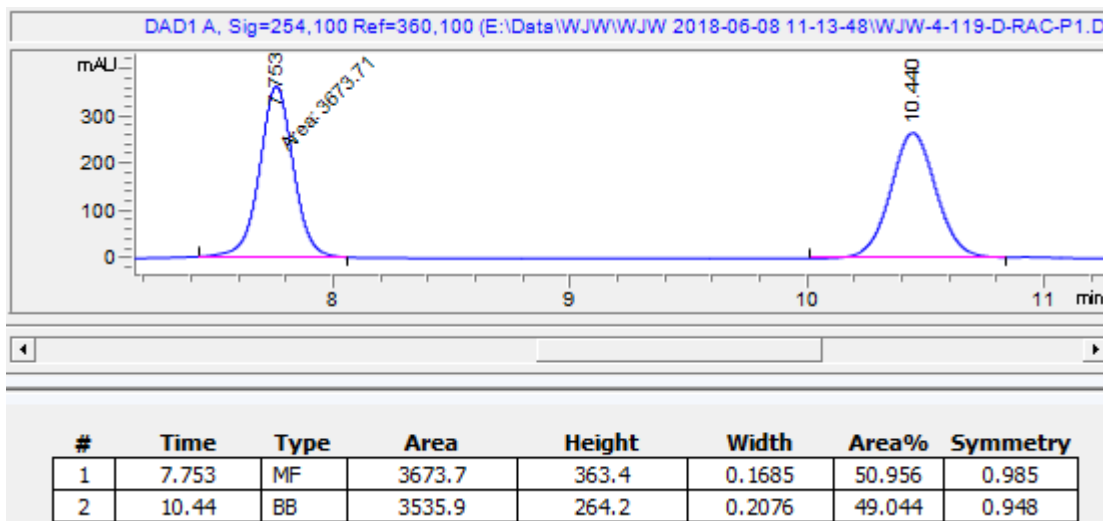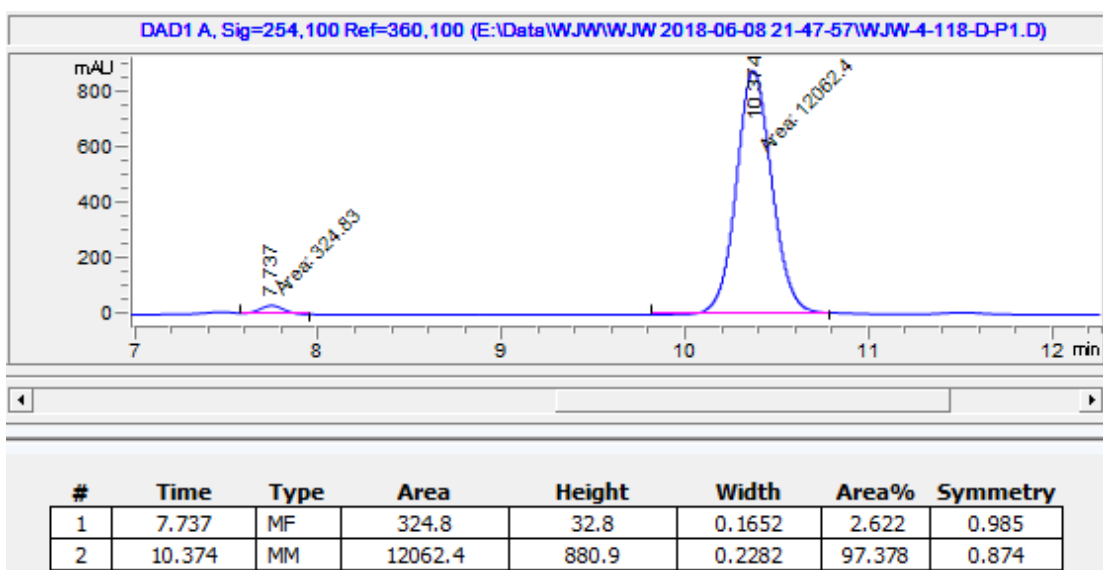

(S)-4-((1*R*,3*S*)-2-acetyl-1-(naphthalen-2-yl)-4-phenylbuta-2,3-dien-1-yl)-2-(3,5-dimethoxyphenyl)-4-ethyloxazol-5(4*H*)-one (**4p**)

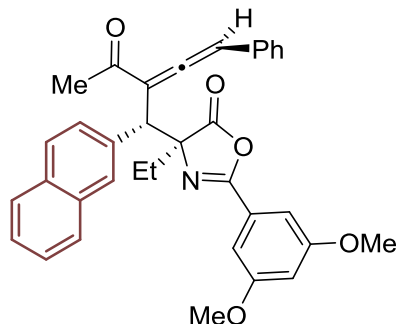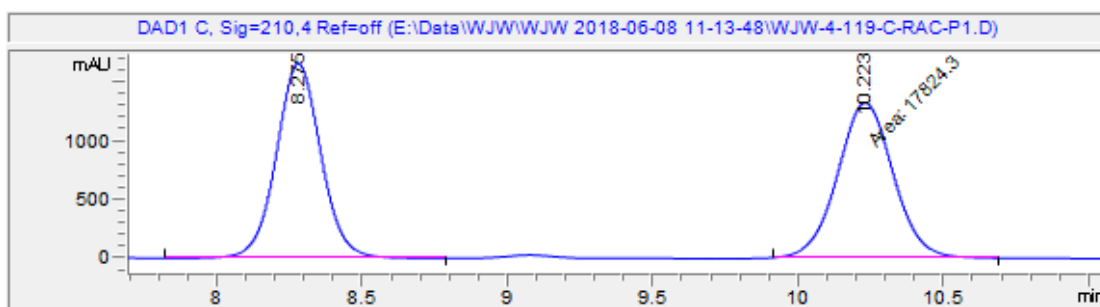

| # | Time   | Type | Area    | Height | Width  | Area%  | Symmetry |
|---|--------|------|---------|--------|--------|--------|----------|
| 1 | 8.275  | VB   | 17777   | 1657.5 | 0.1661 | 49.934 | 0.959    |
| 2 | 10.223 | FM   | 17824.3 | 1325.4 | 0.2241 | 50.066 | 0.966    |

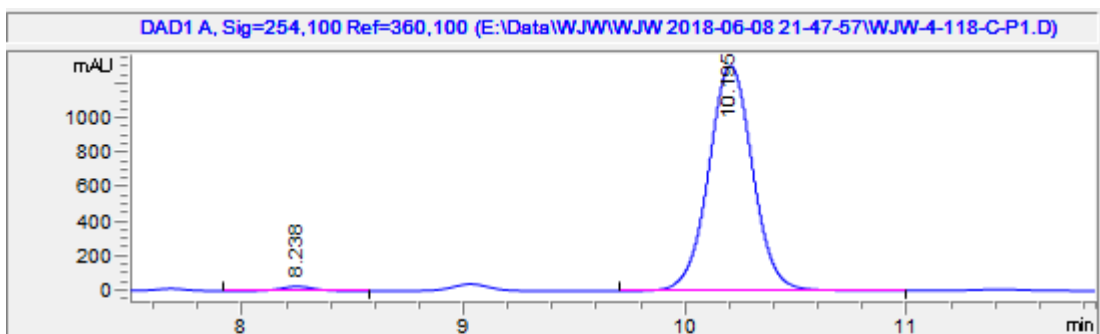

| # | Time   | Type | Area    | Height | Width  | Area%  | Symmetry |
|---|--------|------|---------|--------|--------|--------|----------|
| 1 | 8.238  | BB   | 276.1   | 26.2   | 0.1621 | 1.507  | 0.968    |
| 2 | 10.195 | BB   | 18051.1 | 1303.1 | 0.1911 | 98.493 | 0.946    |



(S)-4-((1*R*,3*S*)-2-acetyl-1-cyclohexyl-4-phenylbuta-2,3-dien-1-yl)-2-(3,5-dimethoxyphenyl)-4-ethoxazole-5(4*H*)-one (**4q**)

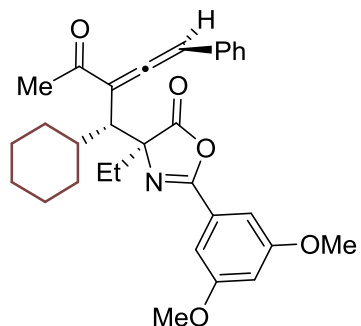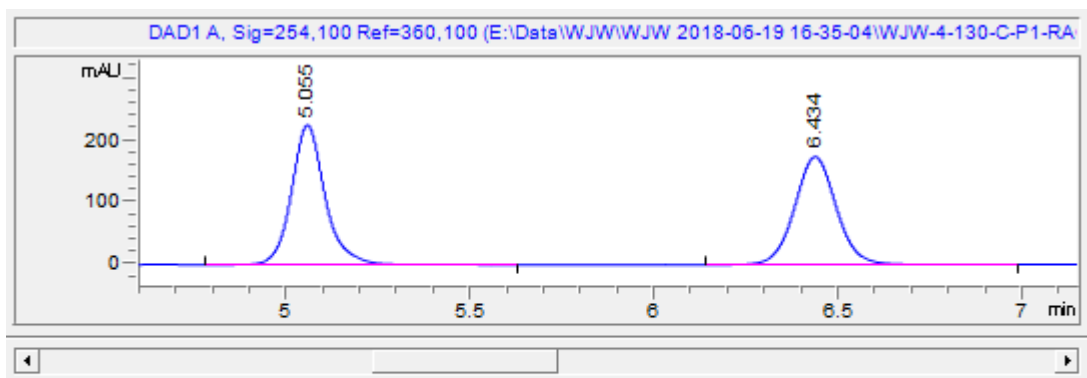

| # | Time  | Type | Area   | Height | Width  | Area%  | Symmetry |
|---|-------|------|--------|--------|--------|--------|----------|
| 1 | 5.055 | BB   | 1422.3 | 223.5  | 0.0958 | 51.065 | 0.856    |
| 2 | 6.434 | BB   | 1362.9 | 172.7  | 0.1211 | 48.935 | 0.944    |

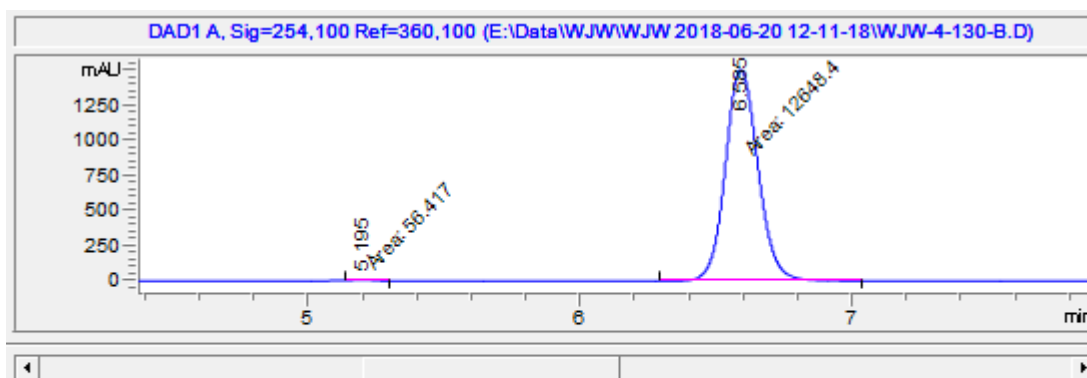

| # | Time  | Type | Area    | Height | Width  | Area%  | Symmetry |
|---|-------|------|---------|--------|--------|--------|----------|
| 1 | 5.195 | FM   | 56.4    | 9      | 0.1046 | 0.444  | 0.843    |
| 2 | 6.585 | MM   | 12648.4 | 1506.3 | 0.1399 | 99.556 | 0.856    |

(S)-4-((1*R*,3*S*)-2-acetyl-1,4-diphenylbuta-2,3-dien-1-yl)-4-butyl-2-(3,5-dimethoxyphenyl)oxazol-5(4*H*)-one (**4v**)

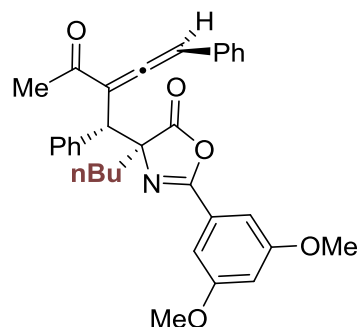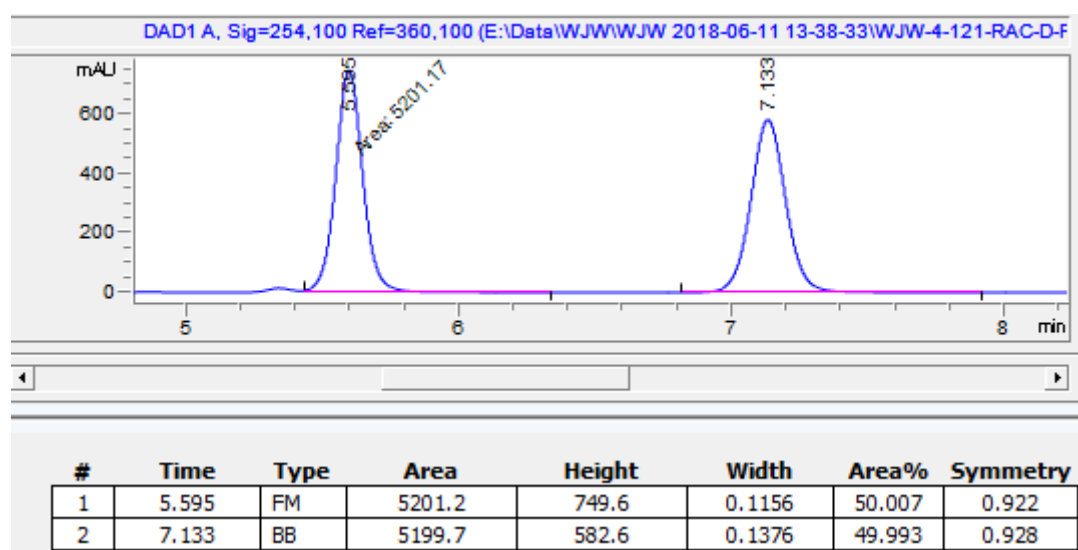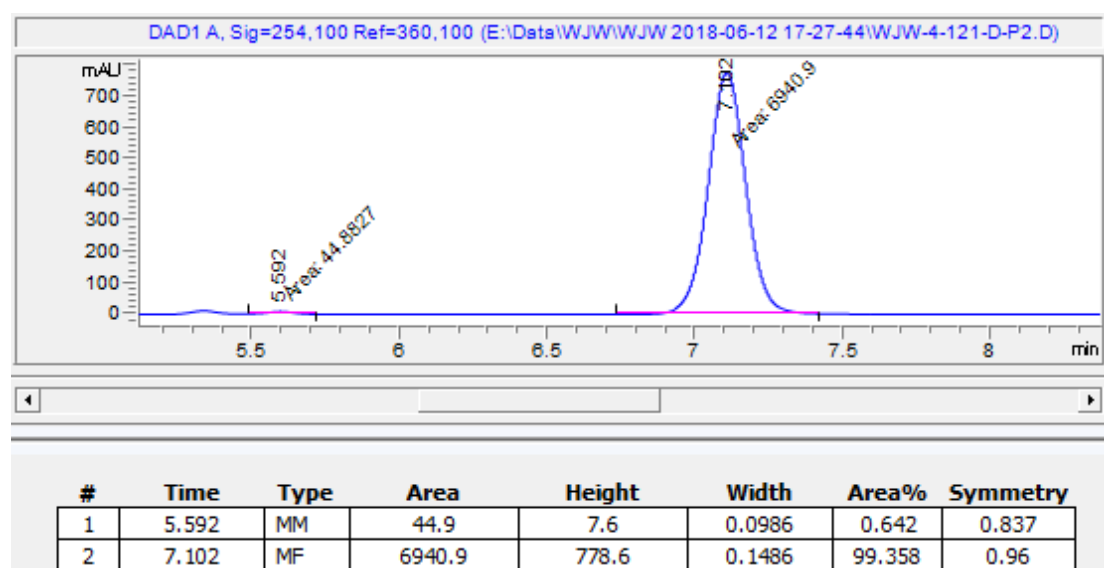

(S)-4-((1*R*,3*S*)-2-acetyl-1,4-diphenylbuta-2,3-dien-1-yl)-4-benzyl-2-(3,5-dimethoxyphenyl)oxazol-5(4H)-one (**4w**)

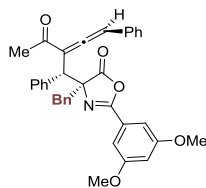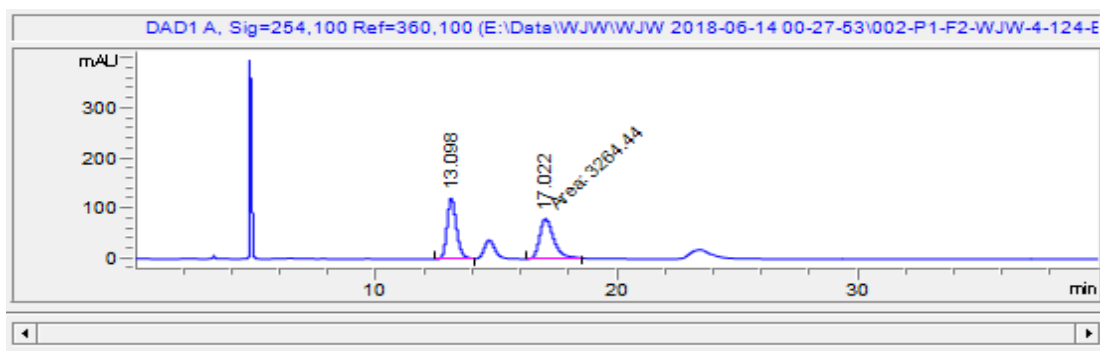

| # | Time   | Type | Area   | Height | Width  | Area%  | Symmetry |
|---|--------|------|--------|--------|--------|--------|----------|
| 1 | 13.098 | BB   | 3237   | 120.5  | 0.395  | 49.789 | 0.791    |
| 2 | 17.022 | MM   | 3264.4 | 79.3   | 0.6865 | 50.211 | 0.688    |

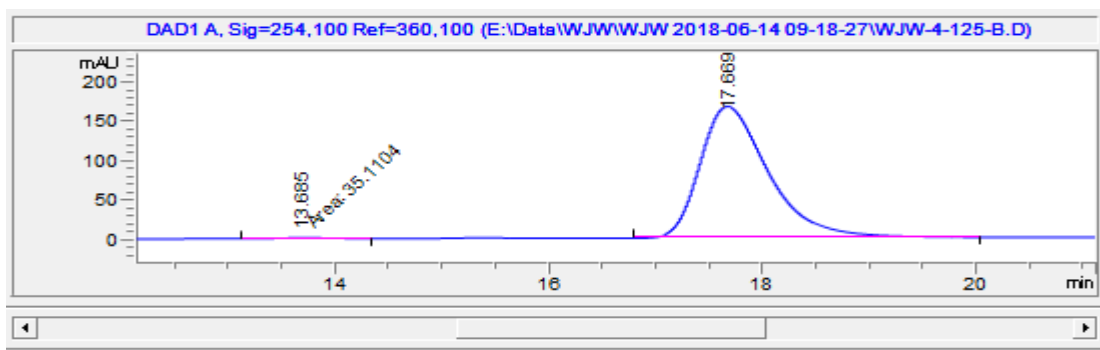

| # | Time   | Type | Area   | Height | Width  | Area%  | Symmetry |
|---|--------|------|--------|--------|--------|--------|----------|
| 1 | 13.685 | MM   | 35.1   | 1.2    | 0.4826 | 0.469  | 0.883    |
| 2 | 17.669 | BB   | 7451.3 | 167    | 0.6016 | 99.531 | 0.627    |

The minor diastereomer:

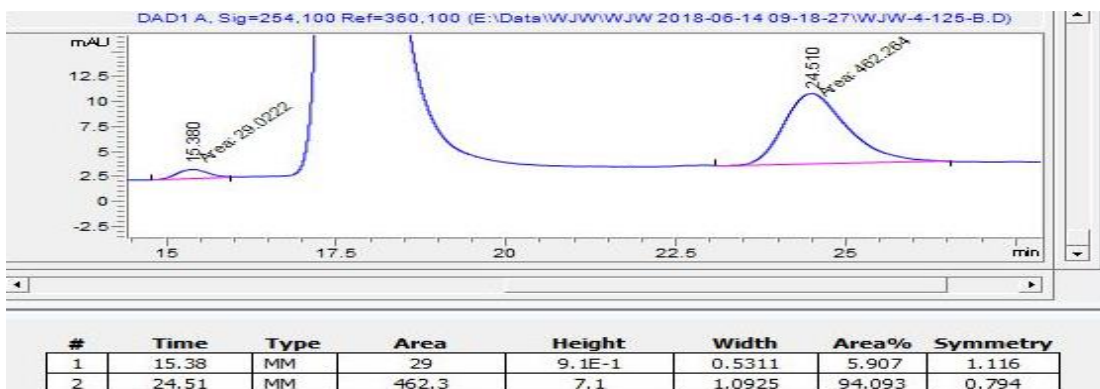

| # | Time  | Type | Area  | Height | Width  | Area%  | Symmetry |
|---|-------|------|-------|--------|--------|--------|----------|
| 1 | 15.38 | MM   | 29    | 9.1E-1 | 0.5311 | 5.907  | 1.116    |
| 2 | 24.51 | MM   | 462.3 | 7.1    | 1.0925 | 94.093 | 0.794    |

(S)-4-((1*R*,3*S*)-2-acetyl-1,4-diphenylbuta-2,3-dien-1-yl)-2-(3,5-dimethoxyphenyl)-4-(2-(methylthio)ethyl)oxazol-5(4*H*)-one (**4x**)

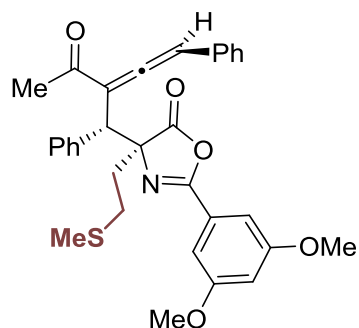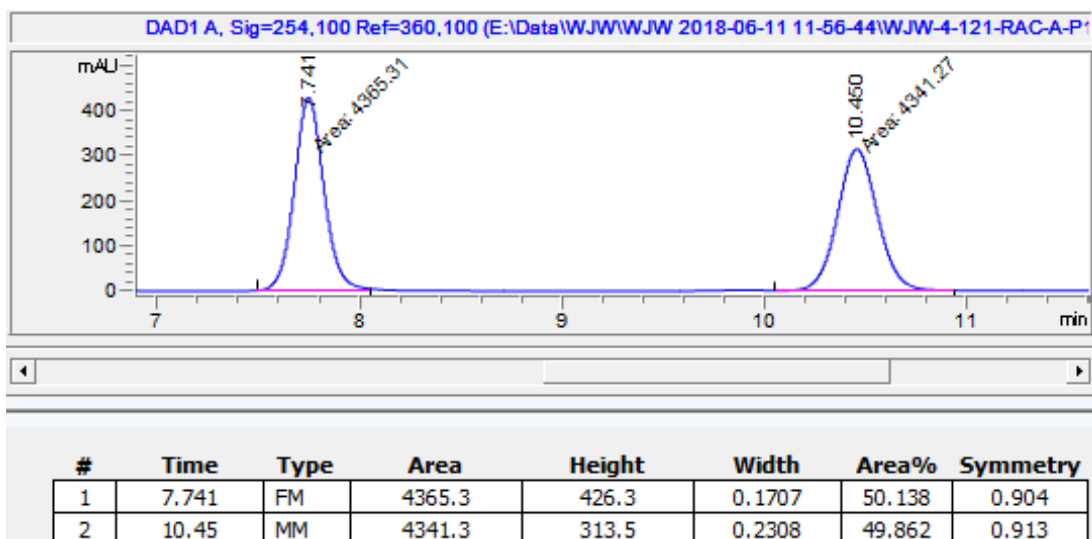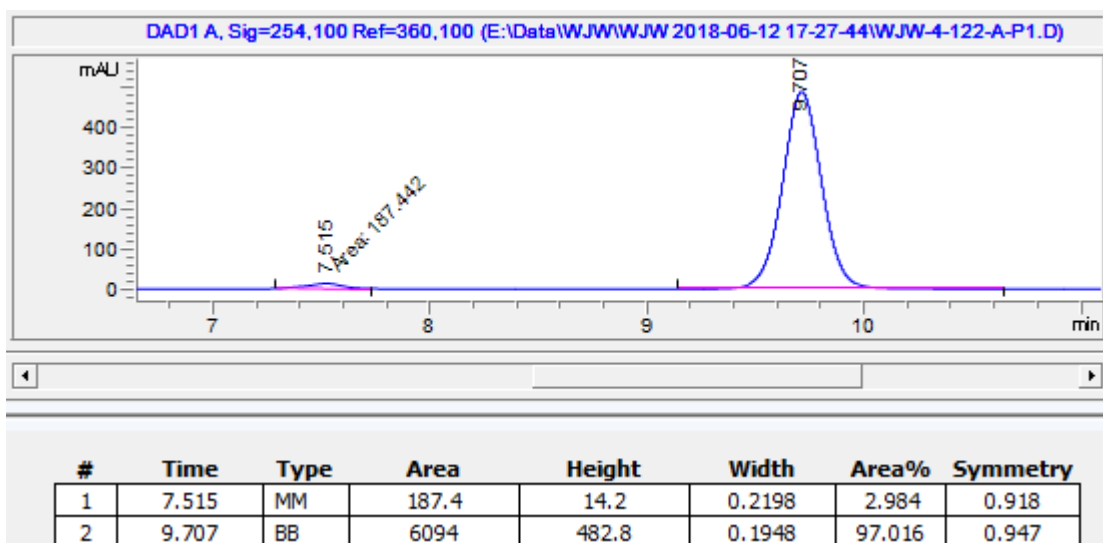

tert-butyl-(4-((S)-4-((1*R*,3*S*)-2-acetyl-1,4-diphenylbuta-2,3-dien-1-yl)-2-(3,5-dimethoxyphenyl)-5-oxo-4,5-dihydrooxazol-4-yl)butyl)carbamate (**4y**)

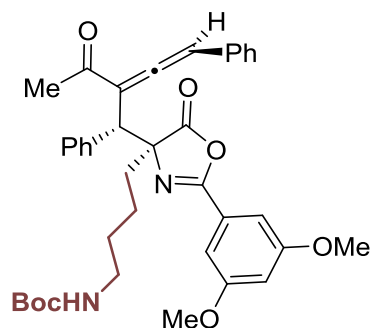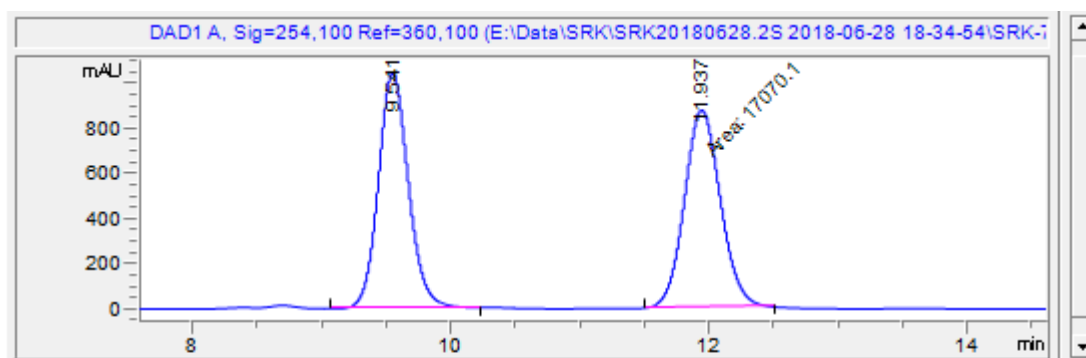

| # | Time   | Type | Area    | Height | Width  | Area%  | Symmetry |
|---|--------|------|---------|--------|--------|--------|----------|
| 1 | 9.541  | BB   | 16959.9 | 1045.2 | 0.2488 | 49.838 | 0.861    |
| 2 | 11.937 | MM   | 17070.1 | 877.4  | 0.3243 | 50.162 | 0.888    |

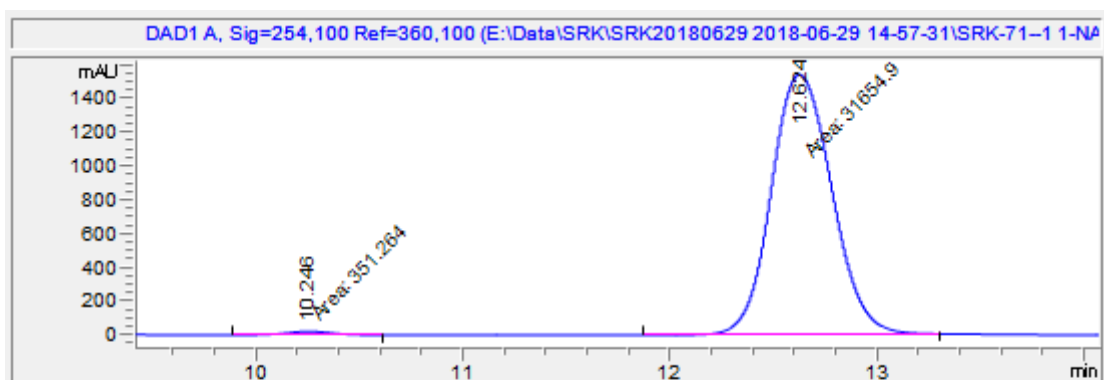

| # | Time   | Type | Area    | Height | Width  | Area%  | Symmetry |
|---|--------|------|---------|--------|--------|--------|----------|
| 1 | 10.246 | MM   | 351.3   | 21.9   | 0.2675 | 1.097  | 0.978    |
| 2 | 12.624 | MF   | 31654.9 | 1544.8 | 0.3415 | 98.903 | 0.835    |

3-benzyl-5-phenylpenta-3,4-dien-2-one(**6a**)

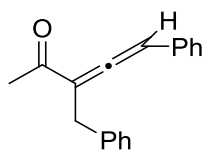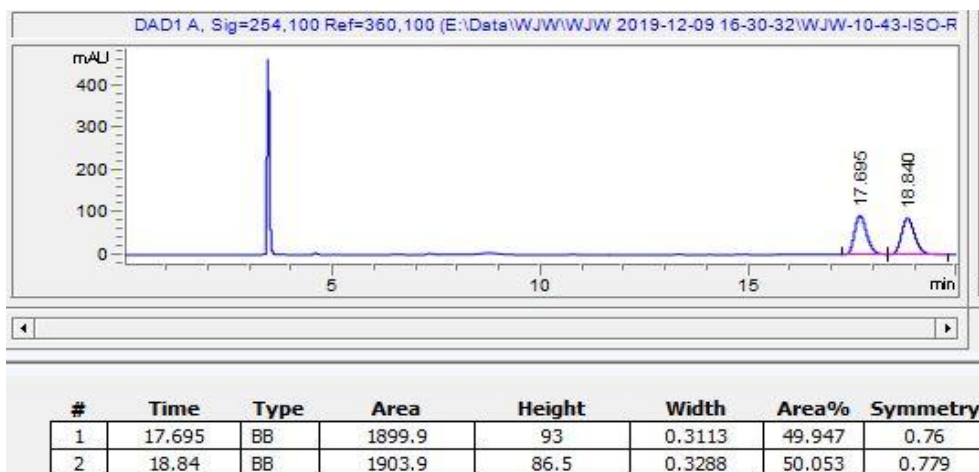

Using (*S*)-**B2** as catalyst

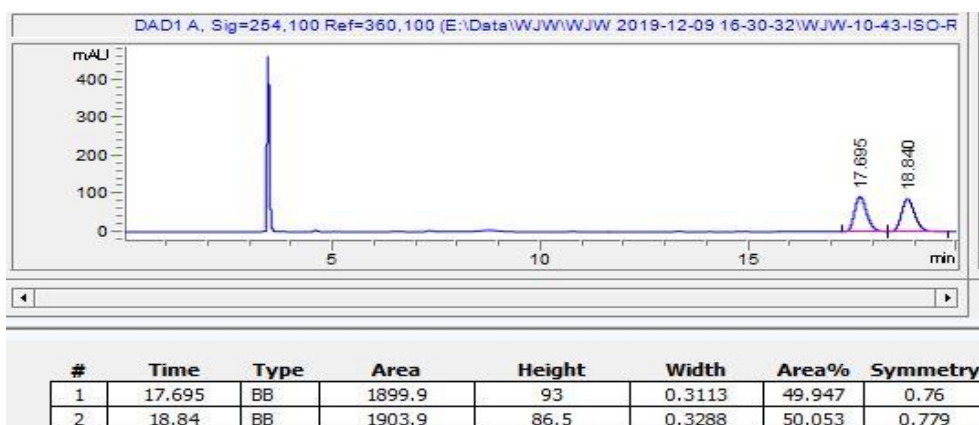

Using (*R*)-**C1** as catalyst

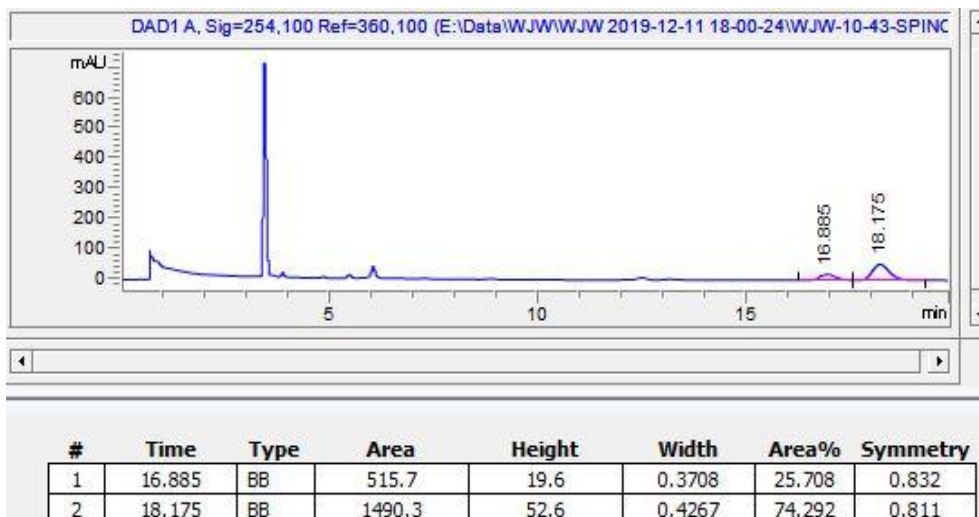

(S)-2-(3,5-dimethoxyphenyl)-4-ethyl-4-((R)-(2-methyl-5-phenylfuran-3-yl)(phenyl)methyl)oxazol-5(4H)-one (**7a**)

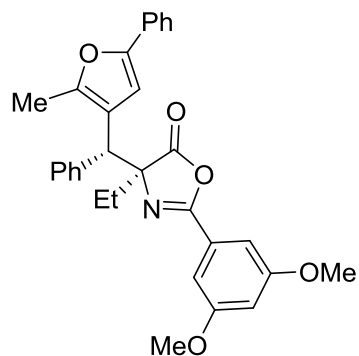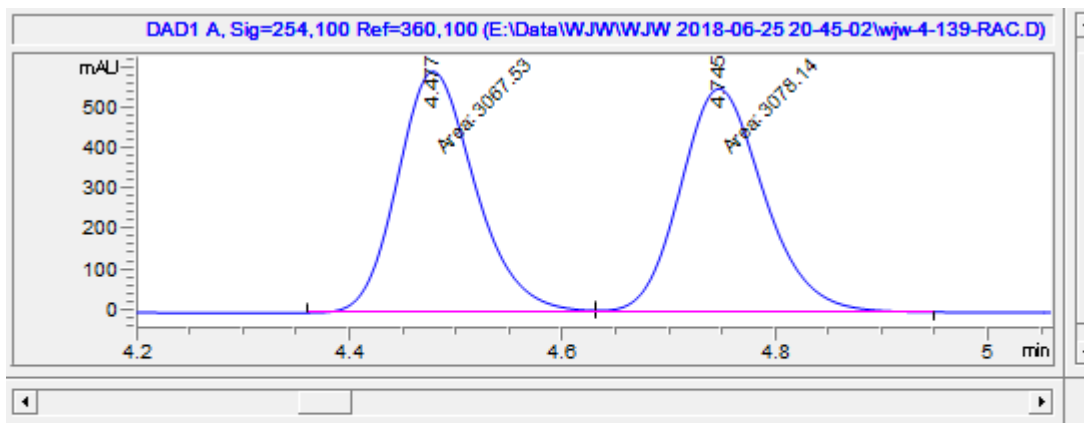

| # | Time  | Type | Area   | Height | Width  | Area%  | Symmetry |
|---|-------|------|--------|--------|--------|--------|----------|
| 1 | 4.477 | FM   | 3067.5 | 601.9  | 0.0849 | 49.914 | 0.828    |
| 2 | 4.745 | MF   | 3078.1 | 558.7  | 0.0918 | 50.086 | 0.845    |

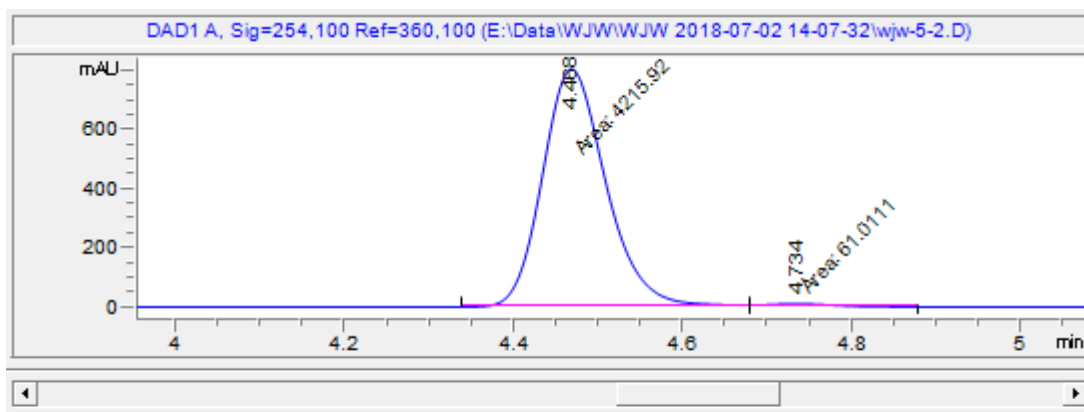

| # | Time  | Type | Area   | Height | Width  | Area%  | Symmetry |
|---|-------|------|--------|--------|--------|--------|----------|
| 1 | 4.468 | MF   | 4215.9 | 802.1  | 0.0876 | 98.573 | 0        |
| 2 | 4.734 | FM   | 61     | 10.6   | 0.096  | 1.427  | 0.808    |

Methyl-(*S*)-2-(3,5-dimethoxybenzamido)-2-((*R*)-(2-methyl-5-phenylfuran-3-yl)(phenyl)methyl)butanoate (8a)

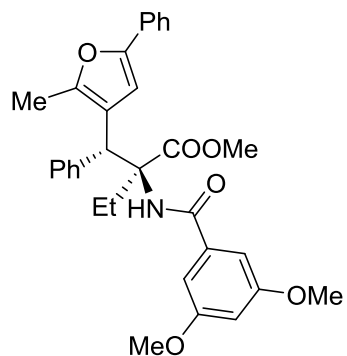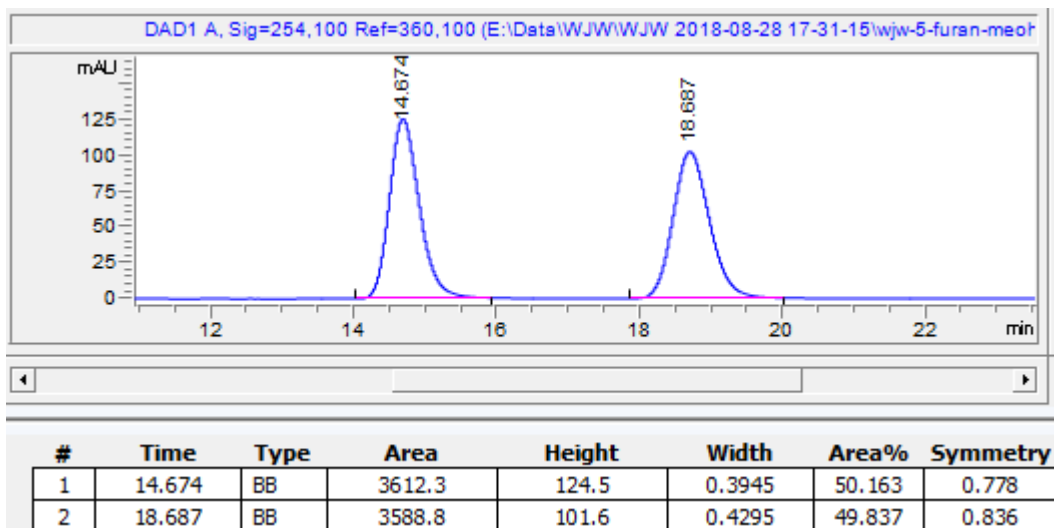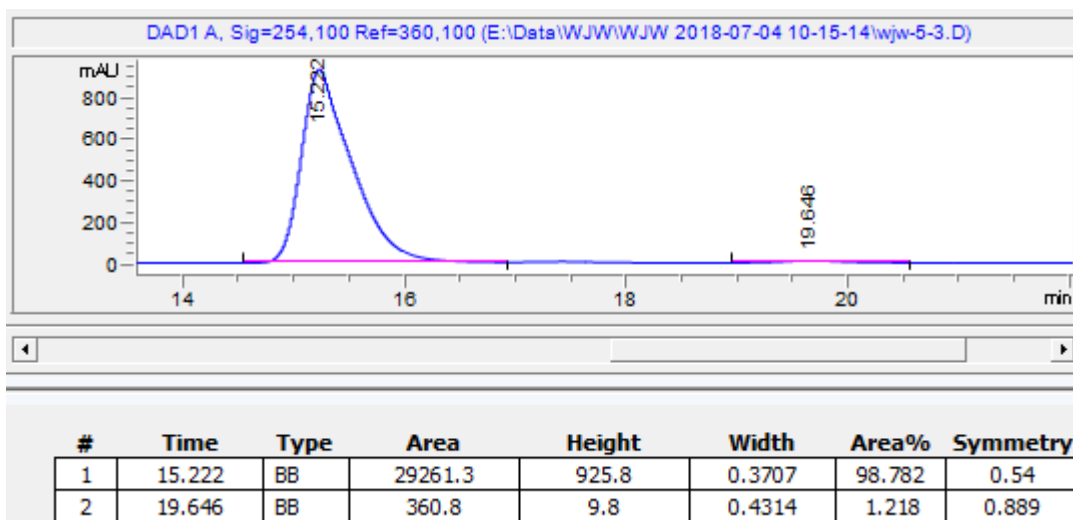



*N*-((3*S*,4*R*,6*R*)-3-ethyl-6-methyl-2-oxo-4-phenyl-5-((*R*)-2-phenylvinylidene)tetrahydro-2*H*-pyran-3-yl)-3,5-dimethoxybenzamide (**9a**)

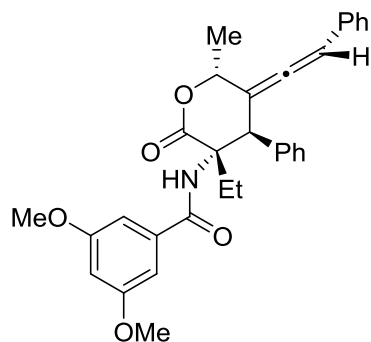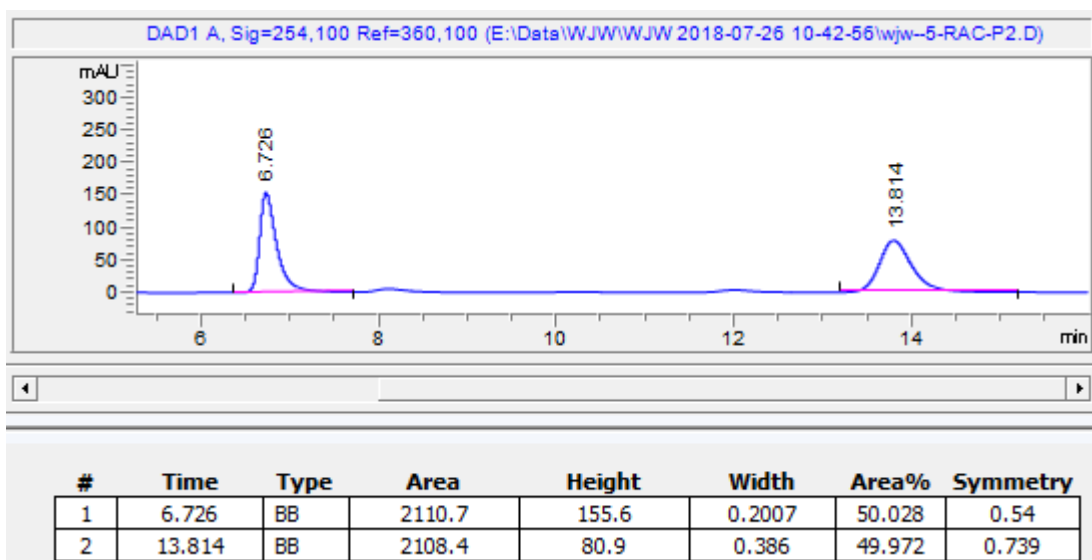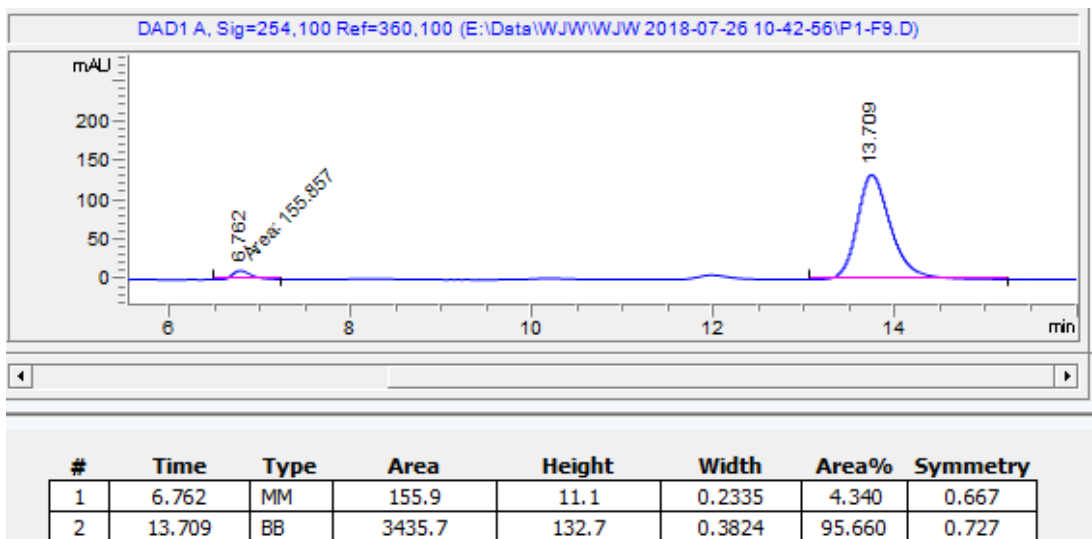

3,5-dimethoxy-N-((1*R*,2*S*)-1-((2*R*,5*S*)-2-methyl-5-phenyl-2,5-dihydrofuran-3-yl)-1-phenyl-2-(propylcarbamoyl)butan-2-yl)benzamide (**11a**)

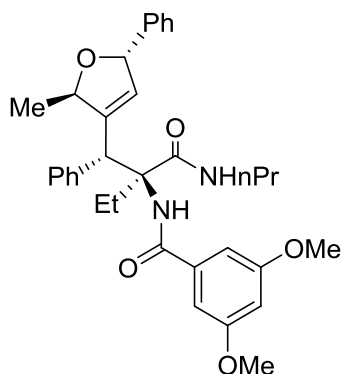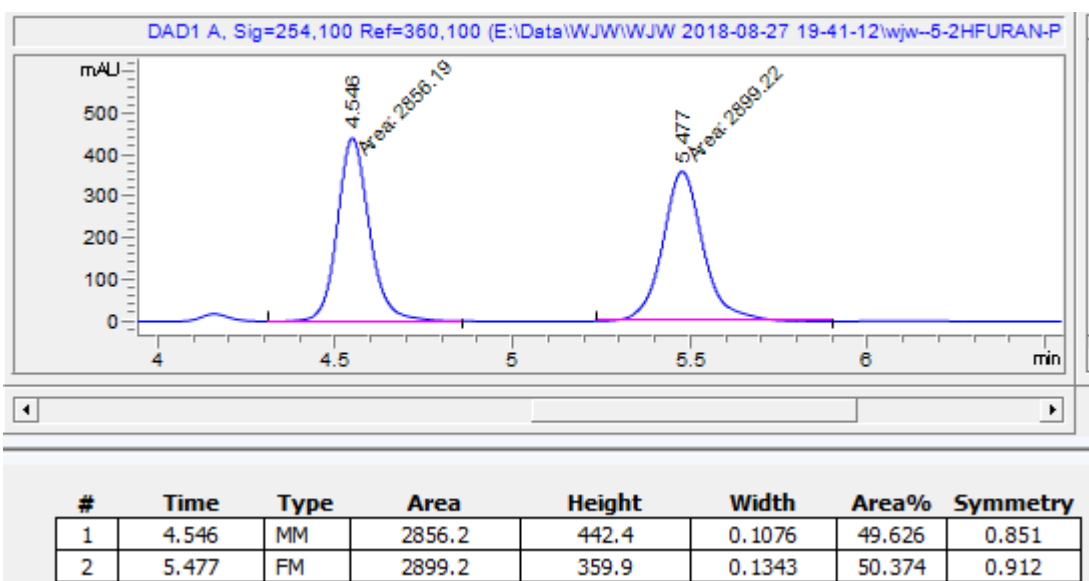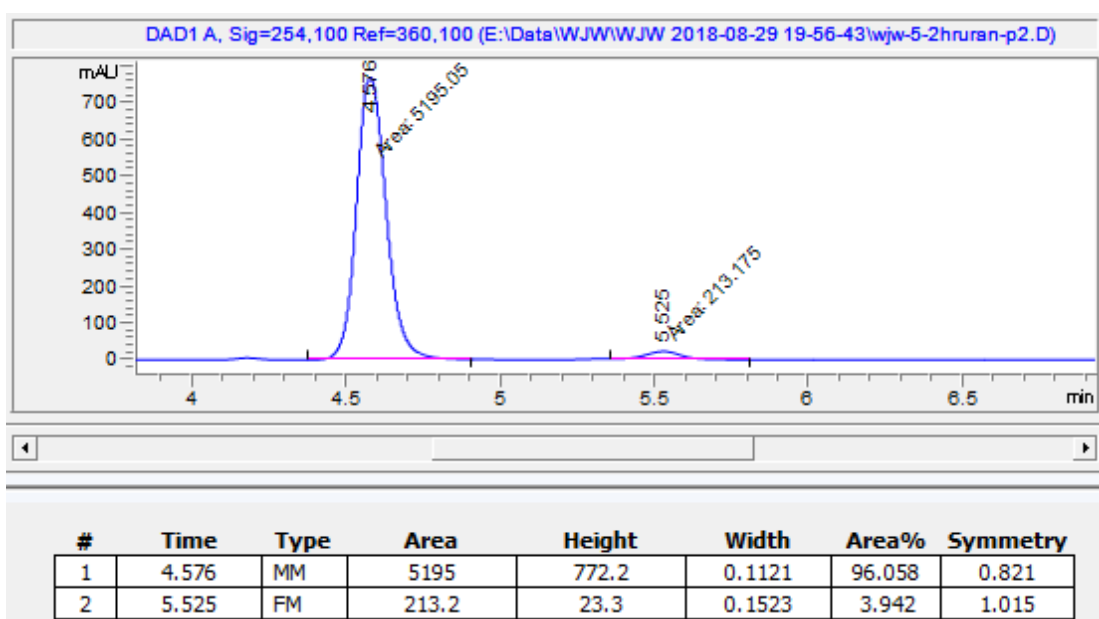

*N*-((1*S*,4*R*,6*R*,10*bR*)-1-ethyl-5-iodo-4-methyl-2-oxo-6-phenyl-1,4,6,10*b*-tetrahydro-2*H*-benzo[*f*]isochro-  
men-1-yl)-3,5-dimethoxybenzamide (**12a**)

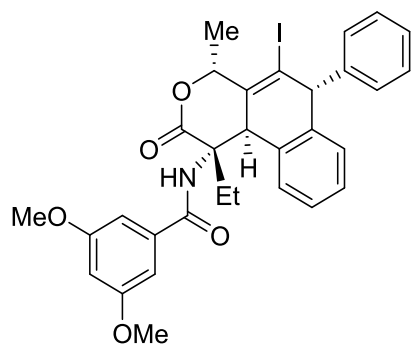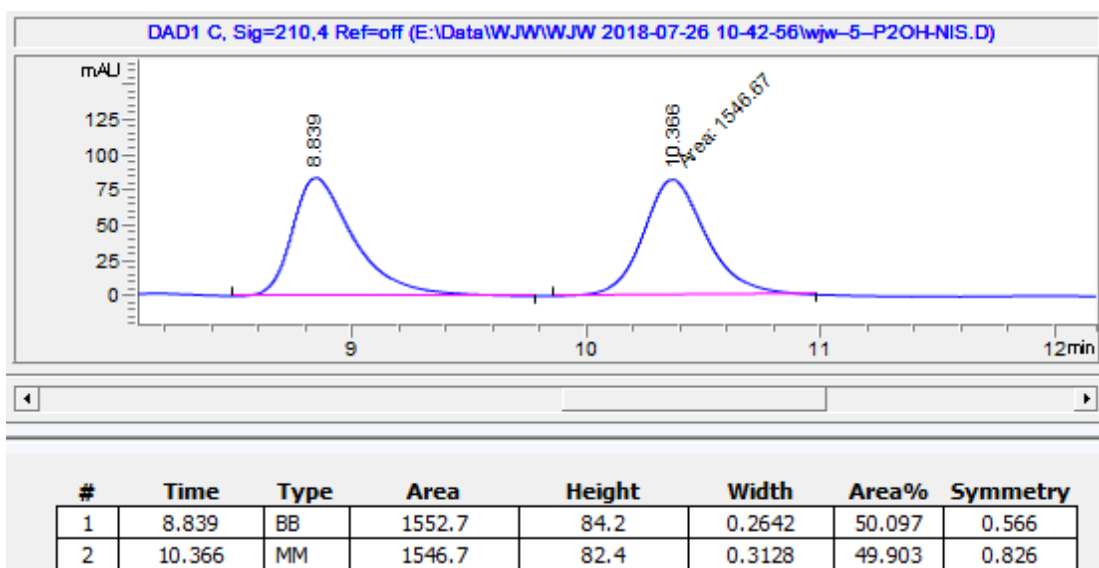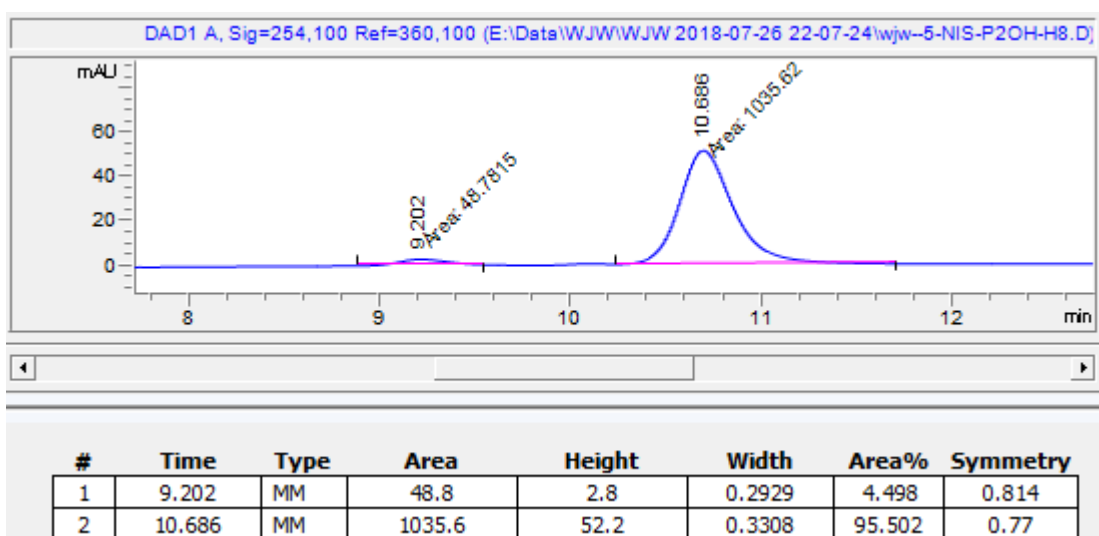

*N*-((3*S*,4*S*,6*S*)-3-ethyl-6-methyl-2-oxo-4-phenyl-5-((*S*)-2-phenylvinylidene)tetrahydro-2*H*-pyran-3-yl)-3,5-dimethoxybenzamide (**13a**)

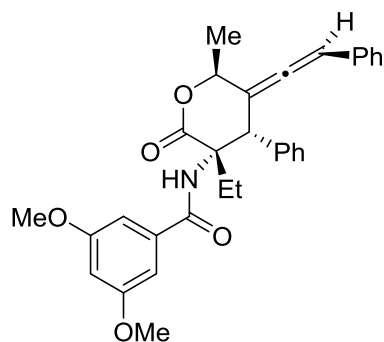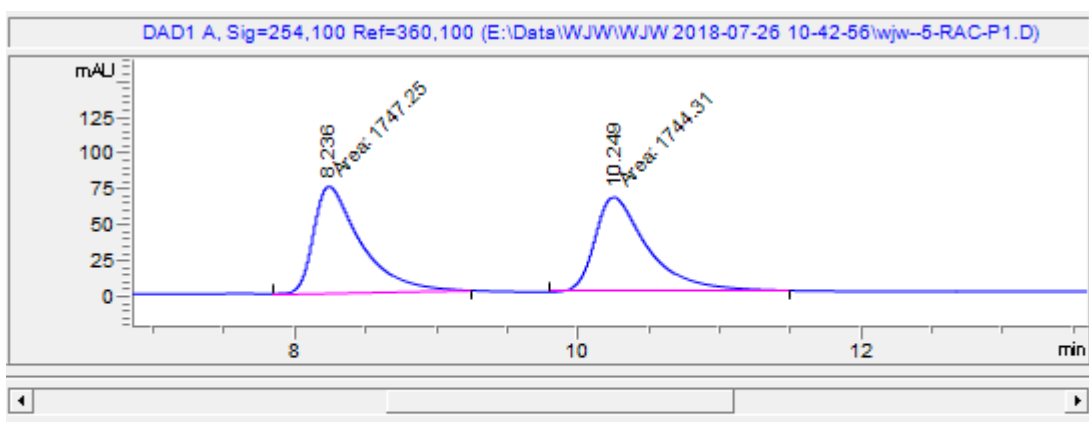

| # | Time   | Type | Area   | Height | Width  | Area%  | Symmetry |
|---|--------|------|--------|--------|--------|--------|----------|
| 1 | 8.236  | MM   | 1747.3 | 74.3   | 0.3918 | 50.042 | 0.475    |
| 2 | 10.249 | MM   | 1744.3 | 65.8   | 0.4419 | 49.958 | 0.527    |

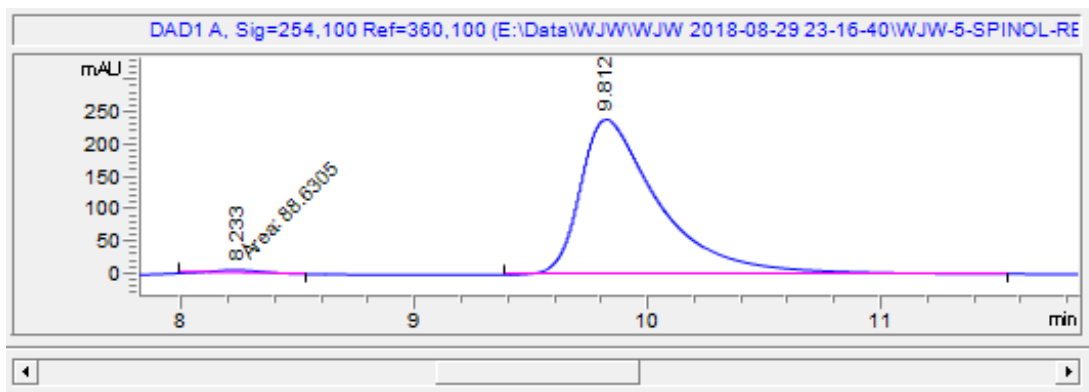

| # | Time  | Type | Area | Height | Width  | Area%  | Symmetry |
|---|-------|------|------|--------|--------|--------|----------|
| 1 | 8.233 | MM   | 88.6 | 5.6    | 0.265  | 1.520  | 0.721    |
| 2 | 9.812 | BB   | 5743 | 242.5  | 0.3348 | 98.480 | 0.449    |

3,5-dimethoxy-*N*-((1*R*,2*S*)-1-((2*S*,5*R*)-2-methyl-5-phenyl-2,5-dihydrofuran-3-yl)-1-phenyl-2-(propylcarbamoyl)butan-2-yl)benzamide (**15a**)

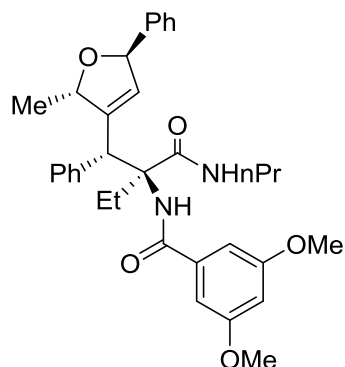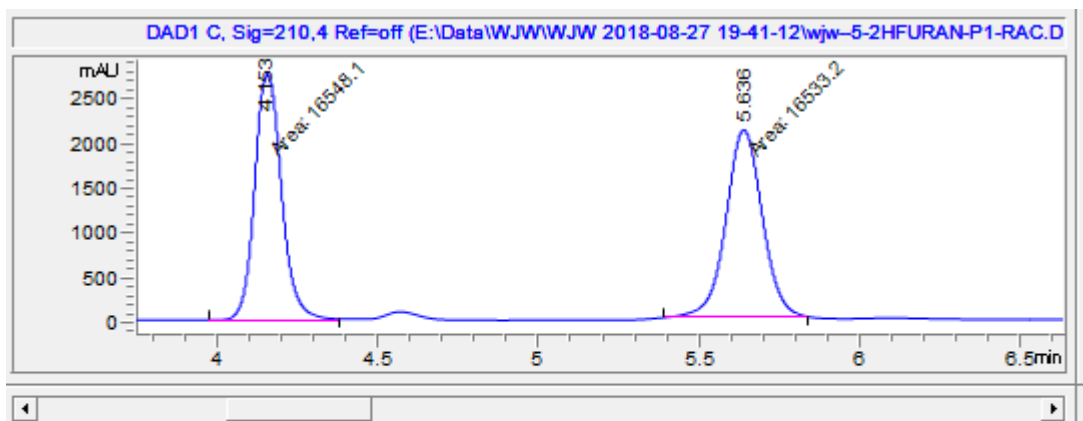

| # | Time  | Type | Area    | Height | Width  | Area%  | Symmetry |
|---|-------|------|---------|--------|--------|--------|----------|
| 1 | 4.153 | MM   | 16548.1 | 2754.4 | 0.1001 | 50.023 | 0.861    |
| 2 | 5.636 | MM   | 16533.2 | 2081.7 | 0.1324 | 49.977 | 0.981    |

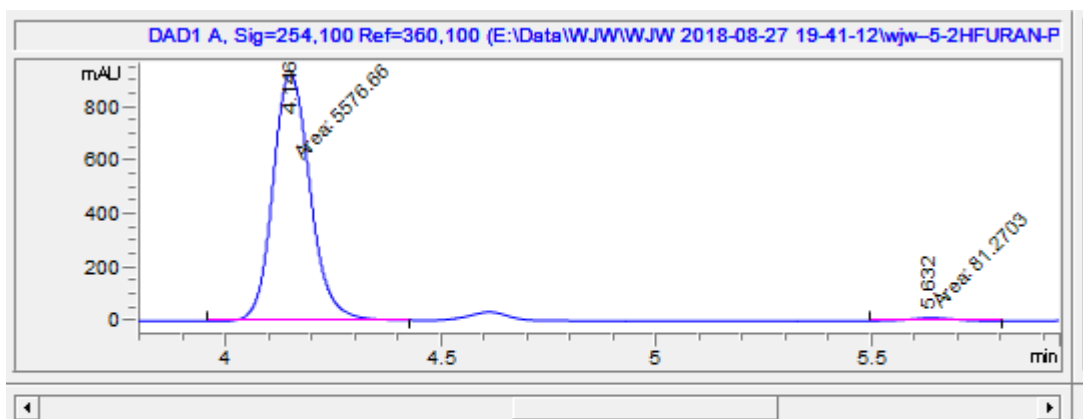

| # | Time  | Type | Area   | Height | Width | Area%  | Symmetry |
|---|-------|------|--------|--------|-------|--------|----------|
| 1 | 4.146 | MF   | 5576.7 | 919.9  | 0.101 | 98.564 | 0.818    |
| 2 | 5.632 | MM   | 81.3   | 11.1   | 0.122 | 1.436  | 0.899    |

(1*R*,5*S*,8*S*,9*S*)-3-(3,5-dimethoxyphenyl)-5-ethyl-1-((*Z*)-1-iodo-2-phenylvinyl)-8-methyl-9-phenyl-2,7-dioxo-4-azabicyclo[3.3.1]non-3-en-6-one (**16a**)

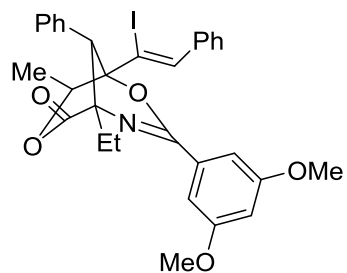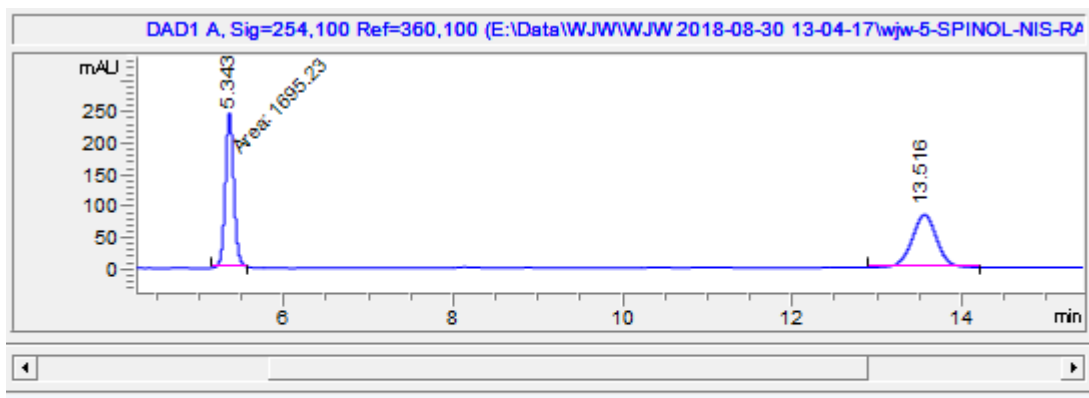

| # | Time   | Type | Area   | Height | Width  | Area%  | Symmetry |
|---|--------|------|--------|--------|--------|--------|----------|
| 1 | 5.343  | MM   | 1695.2 | 245.9  | 0.1149 | 49.850 | 0.936    |
| 2 | 13.516 | BB   | 1705.4 | 84.3   | 0.2904 | 50.150 | 1.017    |

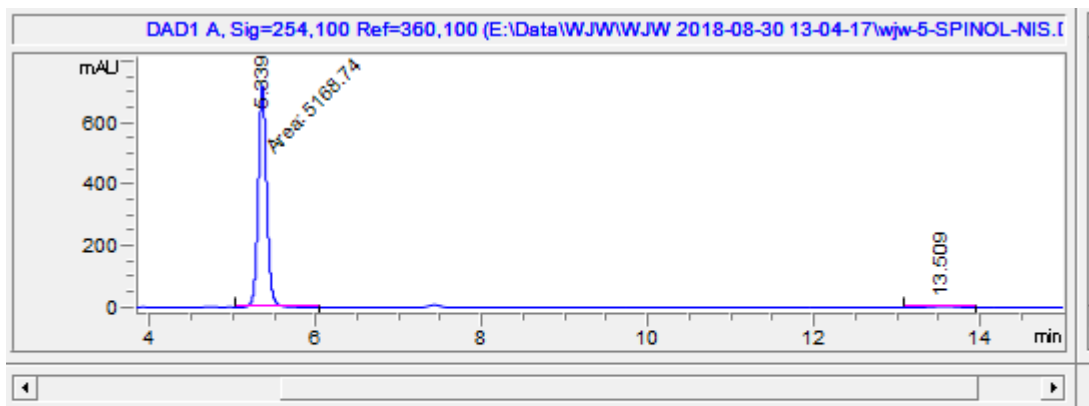

| # | Time   | Type | Area   | Height | Width  | Area%  | Symmetry |
|---|--------|------|--------|--------|--------|--------|----------|
| 1 | 5.339  | FM   | 5168.7 | 727.2  | 0.1185 | 98.497 | 0.912    |
| 2 | 13.509 | BB   | 78.9   | 3.9    | 0.2349 | 1.503  | 0.987    |

## NMR Spectrums:

4-hydroxy-2,6-bis(4-methylnaphthalen-1-yl)-8,9,10,11,12,13,14,15-octahydroindaphtho[2,1-d:1',2'-f][1,3,2]dioxaphosphine 4-oxide (**S**)-**B2**

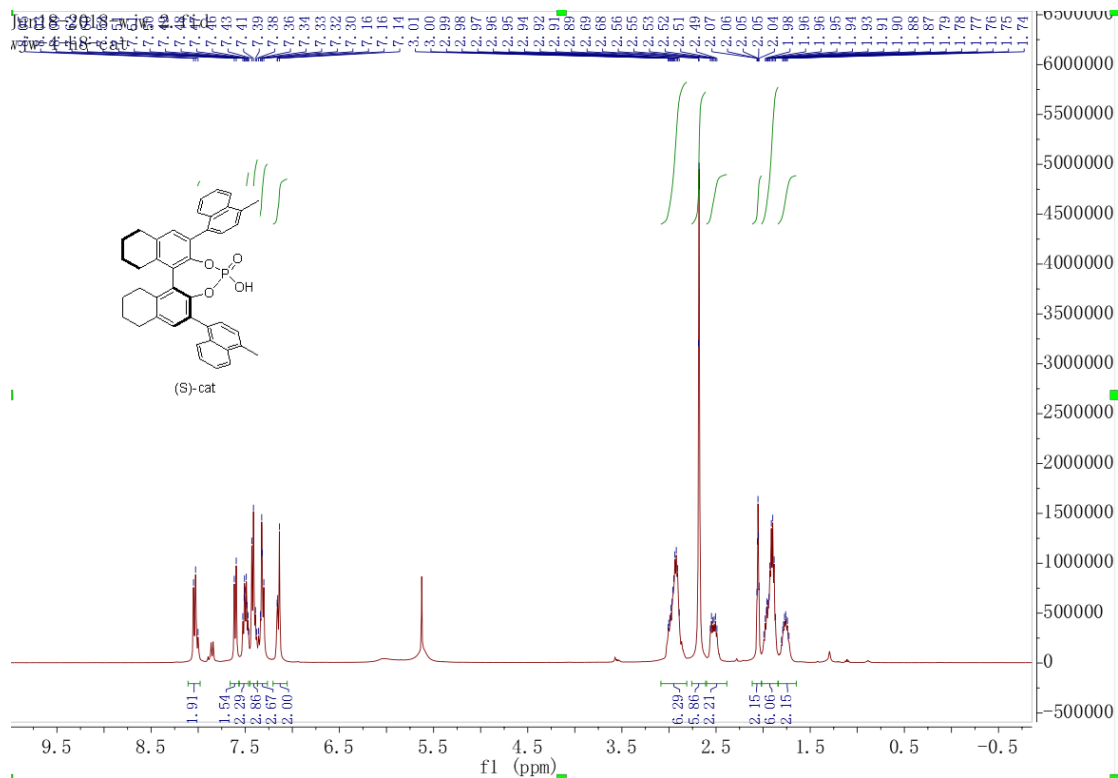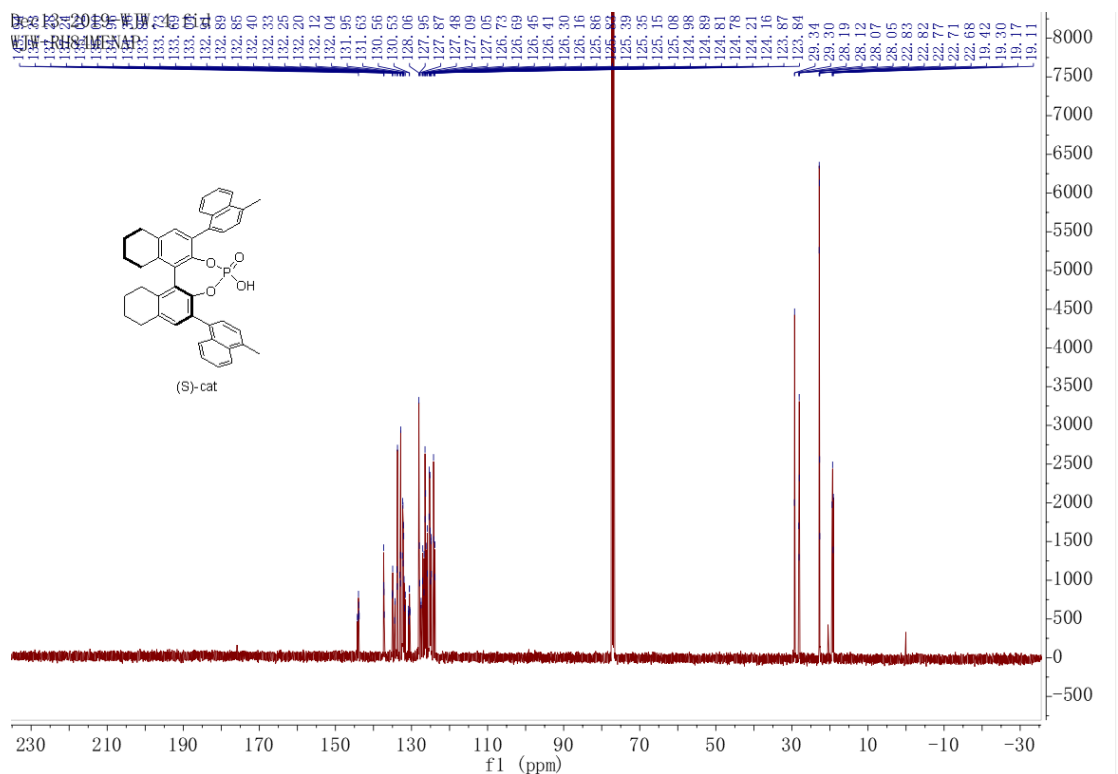

Jun18-2018-wjw. 4. fid  
wjw-4-h8-cat

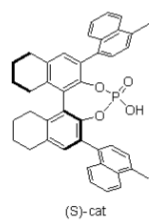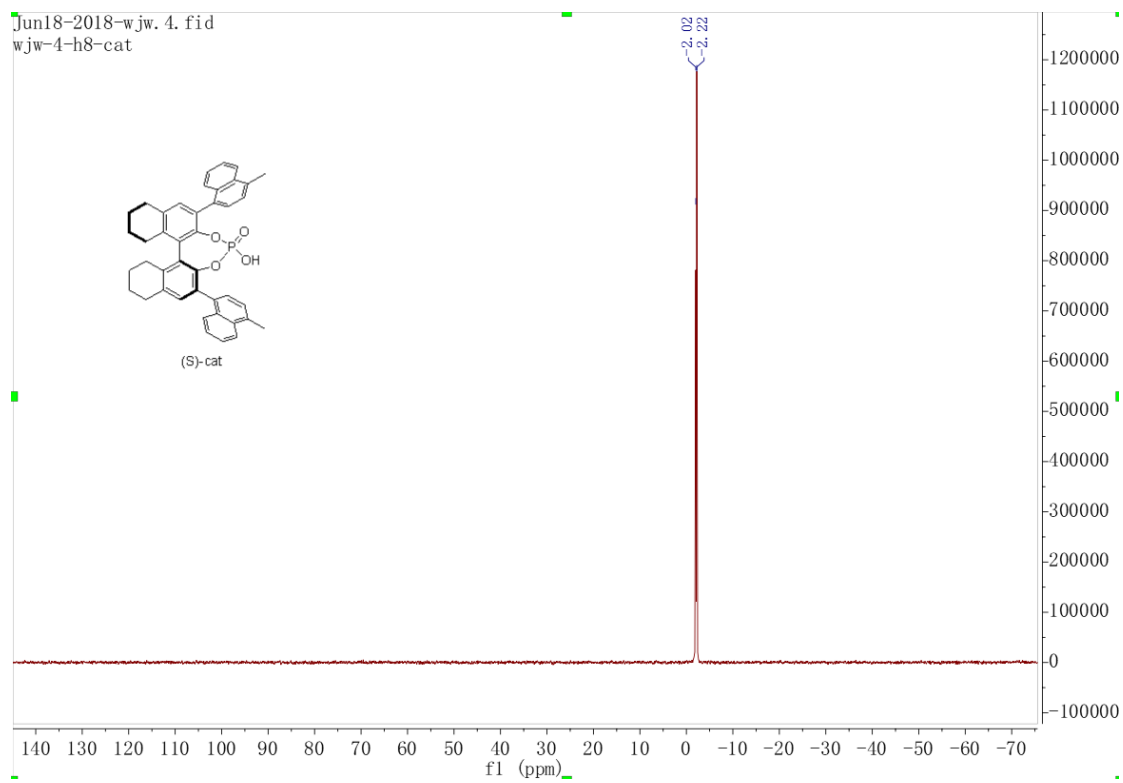



(E)-3-benzylidene-5-(4-chlorophenyl)pent-4-yn-2-one (**1c**)

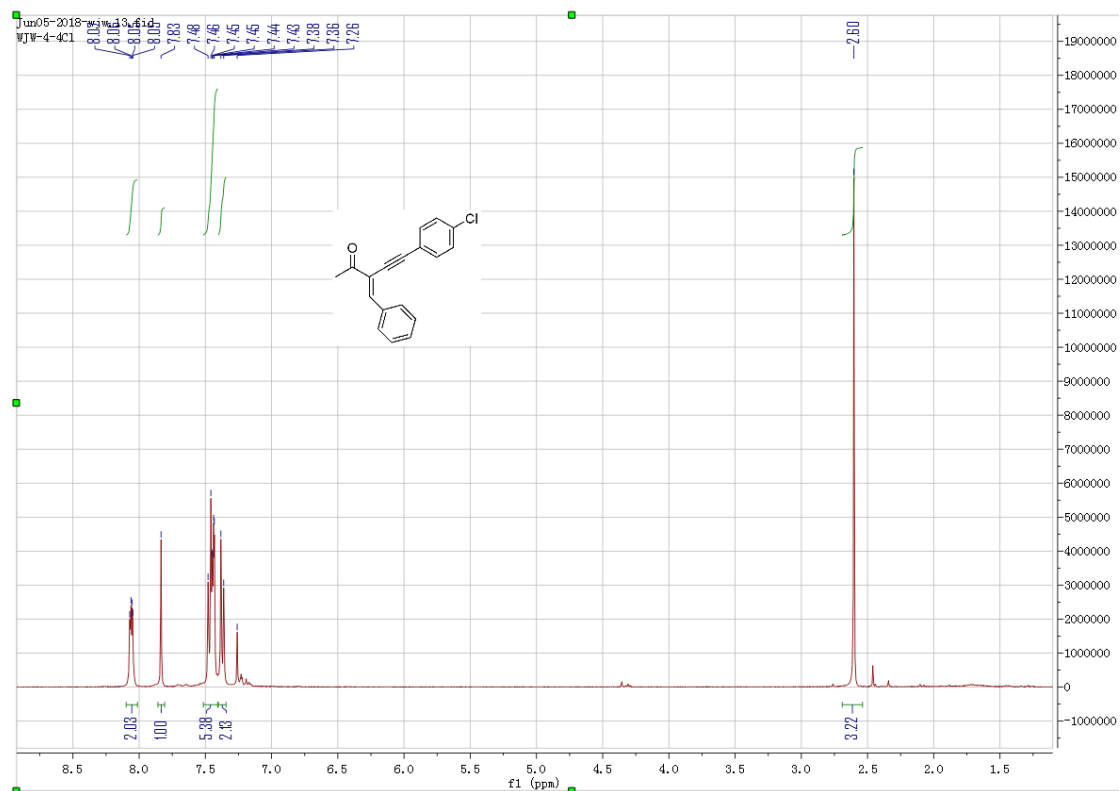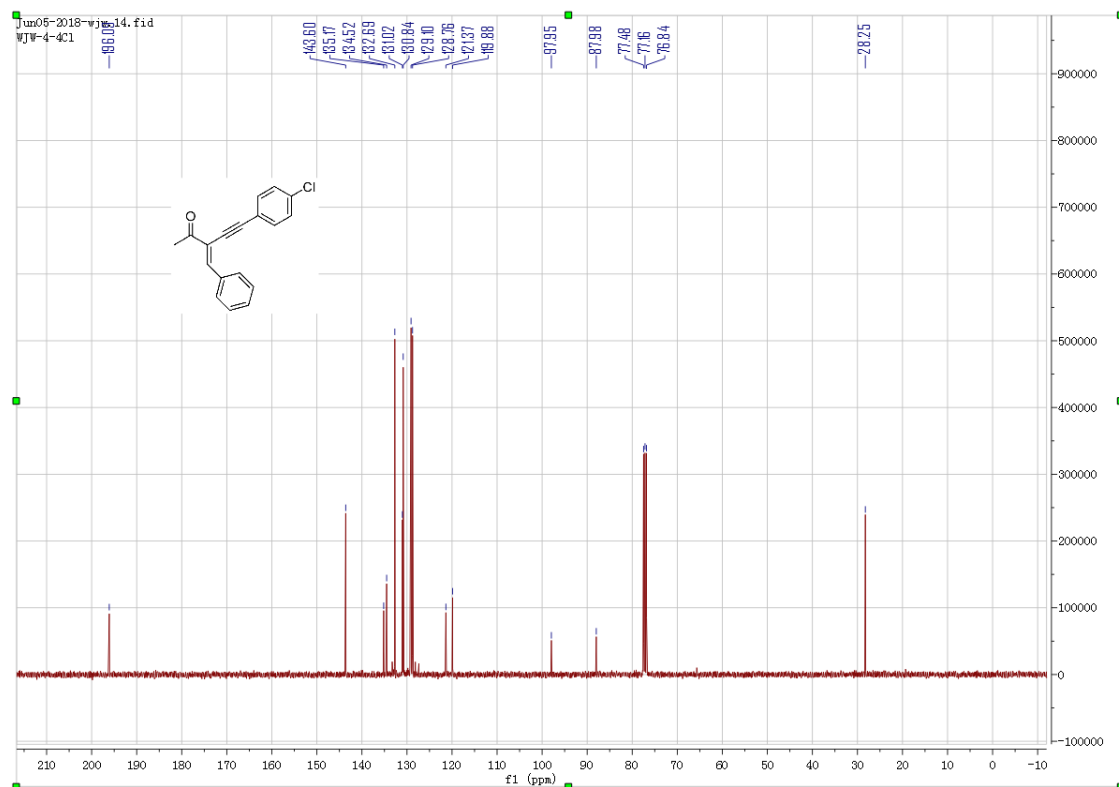

Methyl (*E*)-3-(3-benzylidene-4-oxopent-1-yn-1-yl)benzoate (**1g**)

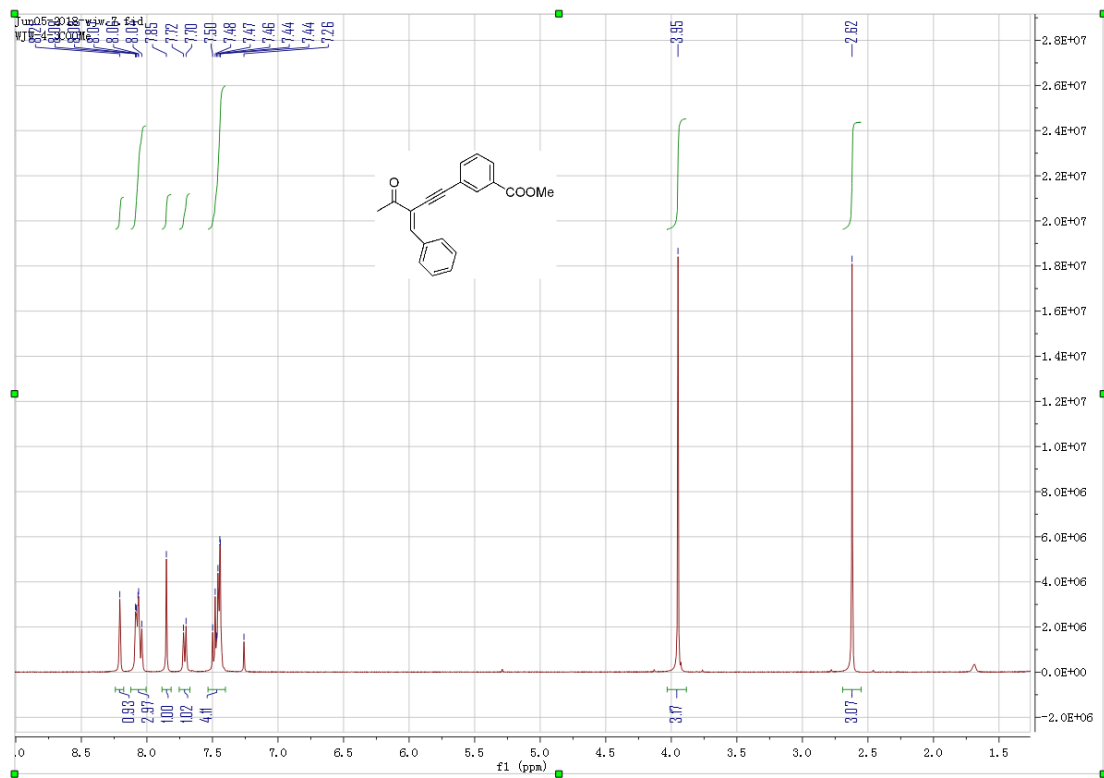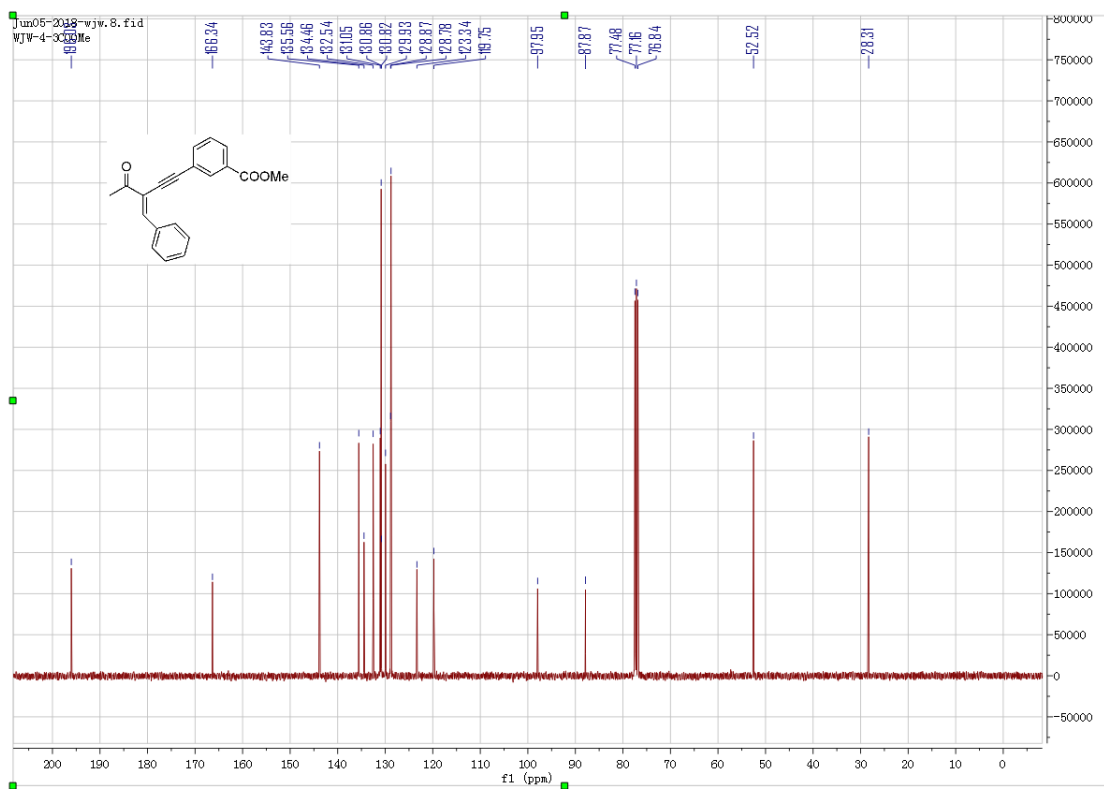

(E)-3-benzylidene-5-(2-chlorophenyl)pent-4-yn-2-one (**1h**)

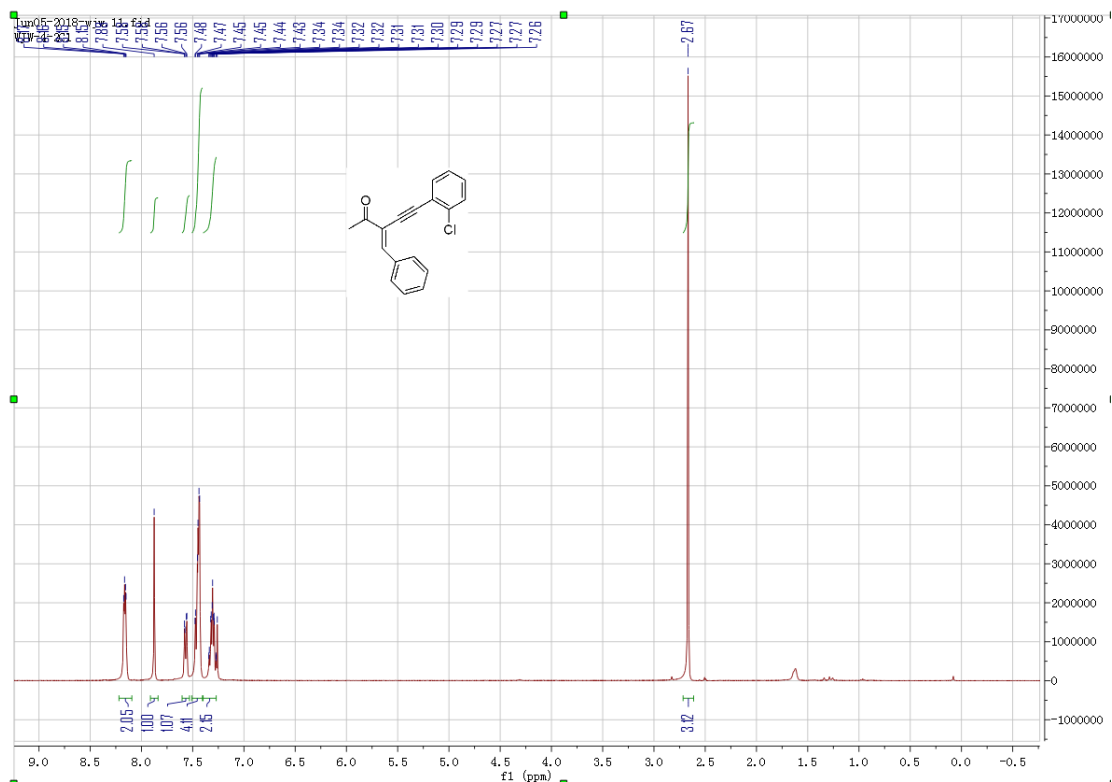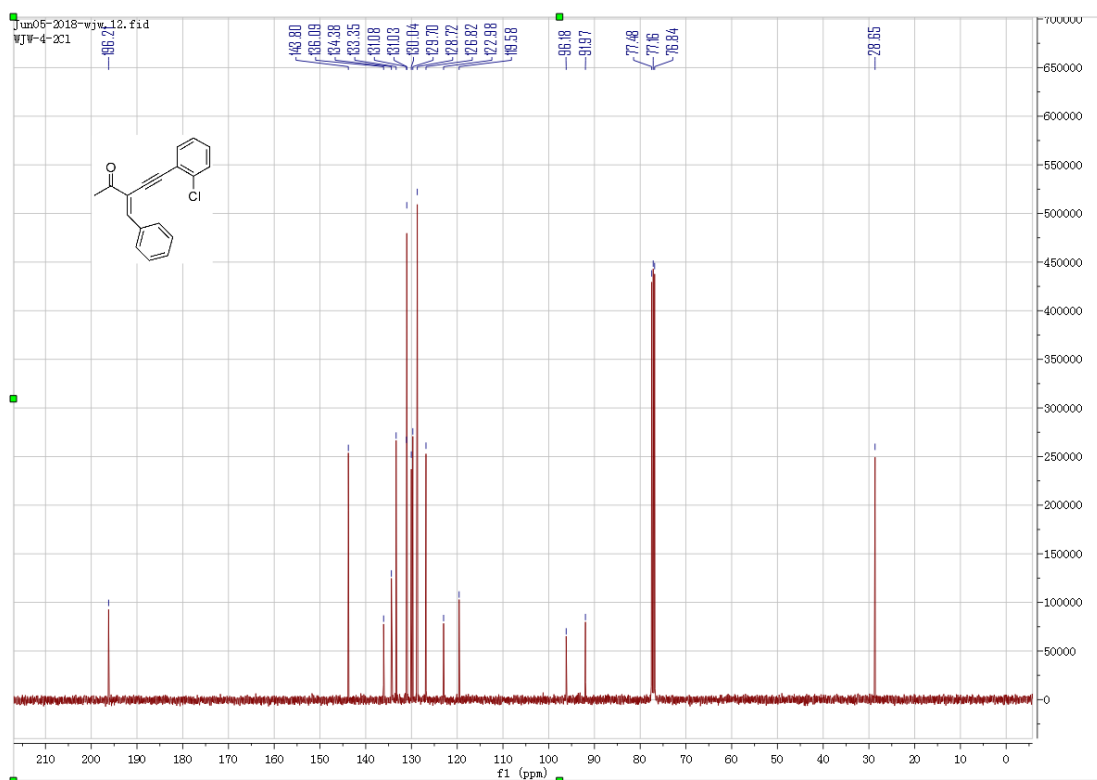

(E)-3-benzylidene-5-(thiophen-3-yl)pent-4-yn-2-one (**1i**)

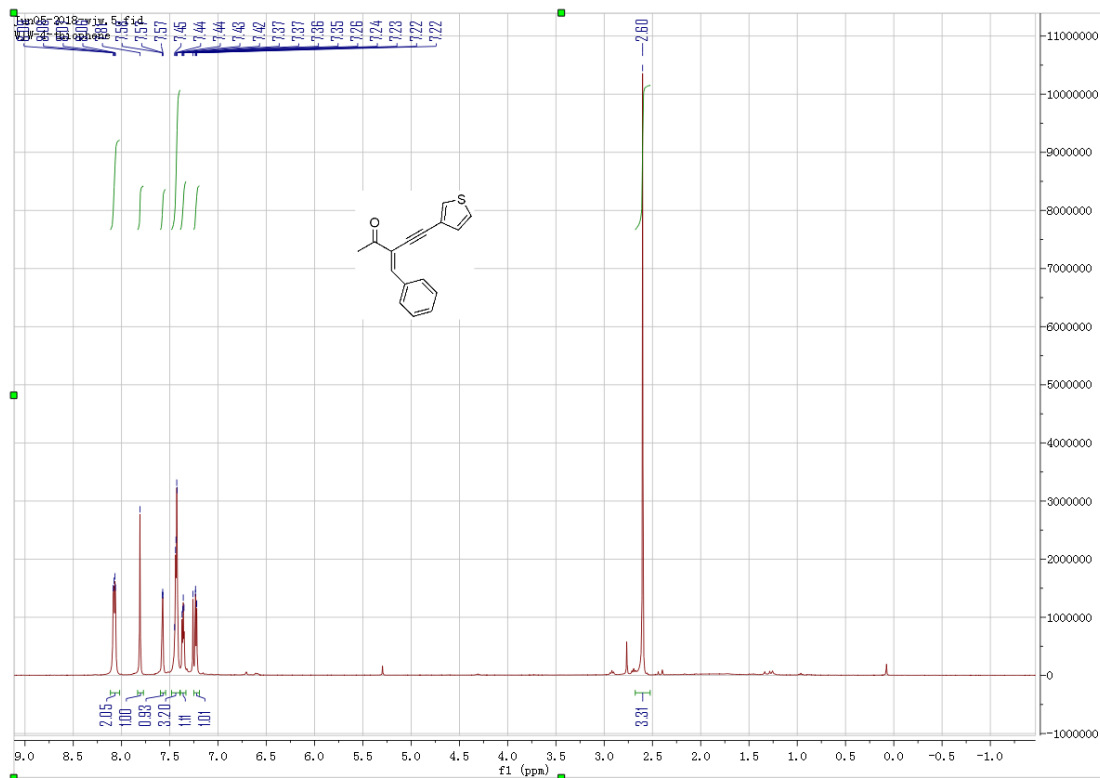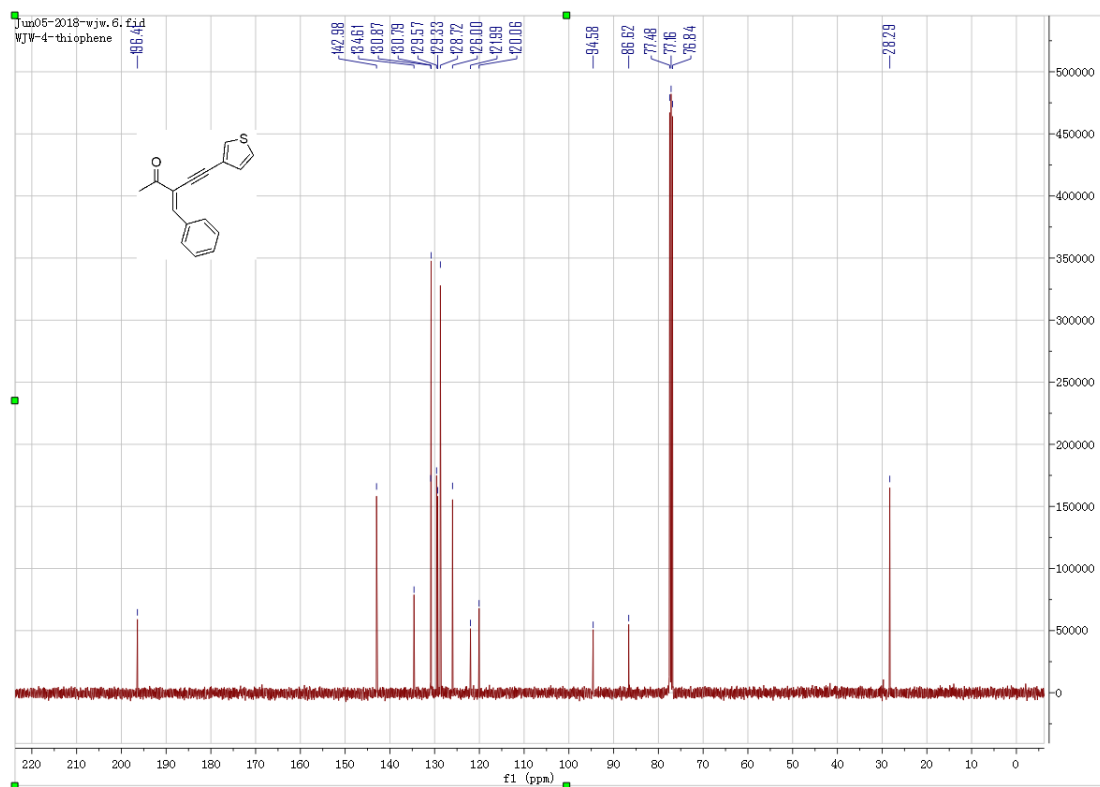

(E)-3-benzylidene-5-(cyclohex-1-en-1-yl)pent-4-yn-2-one (**1j**)

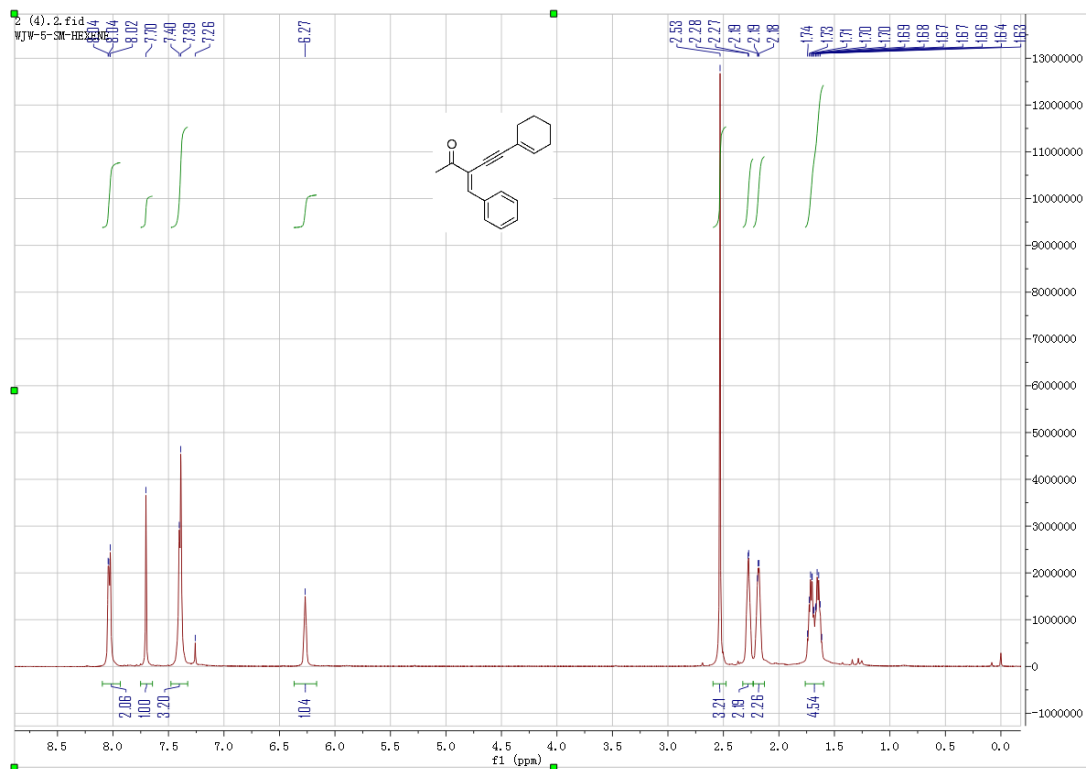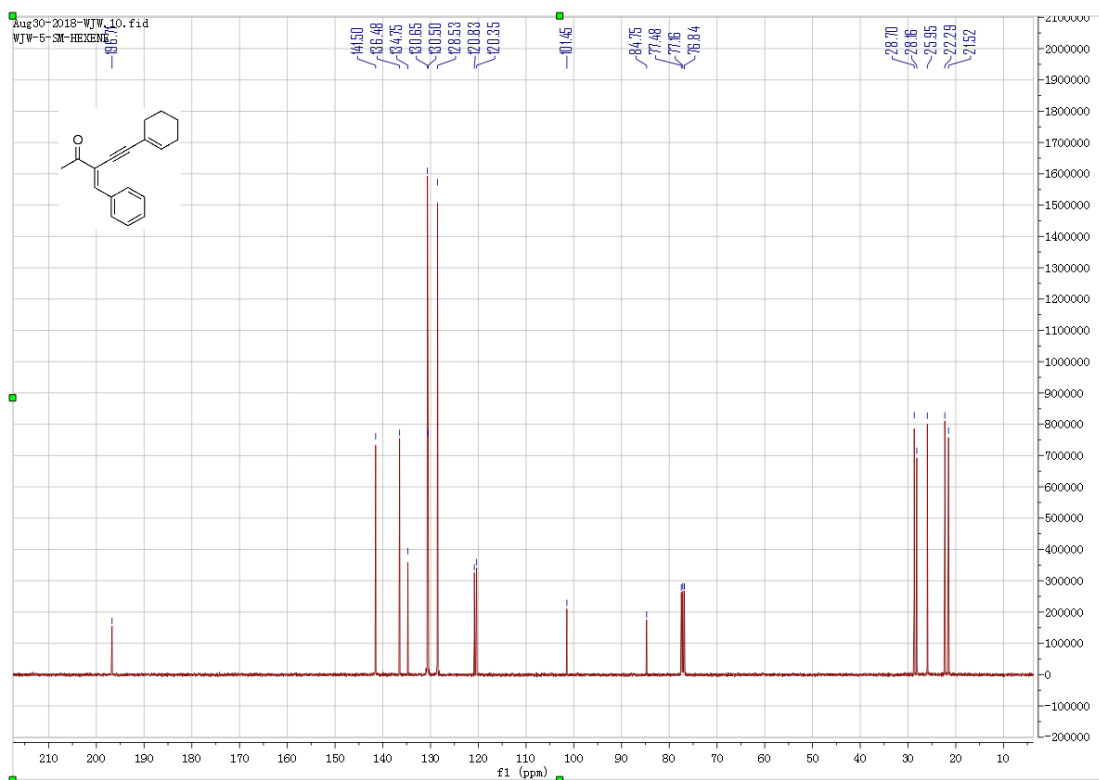

(E)-3-benzylidenenon-4-yn-2-one (**1k**)

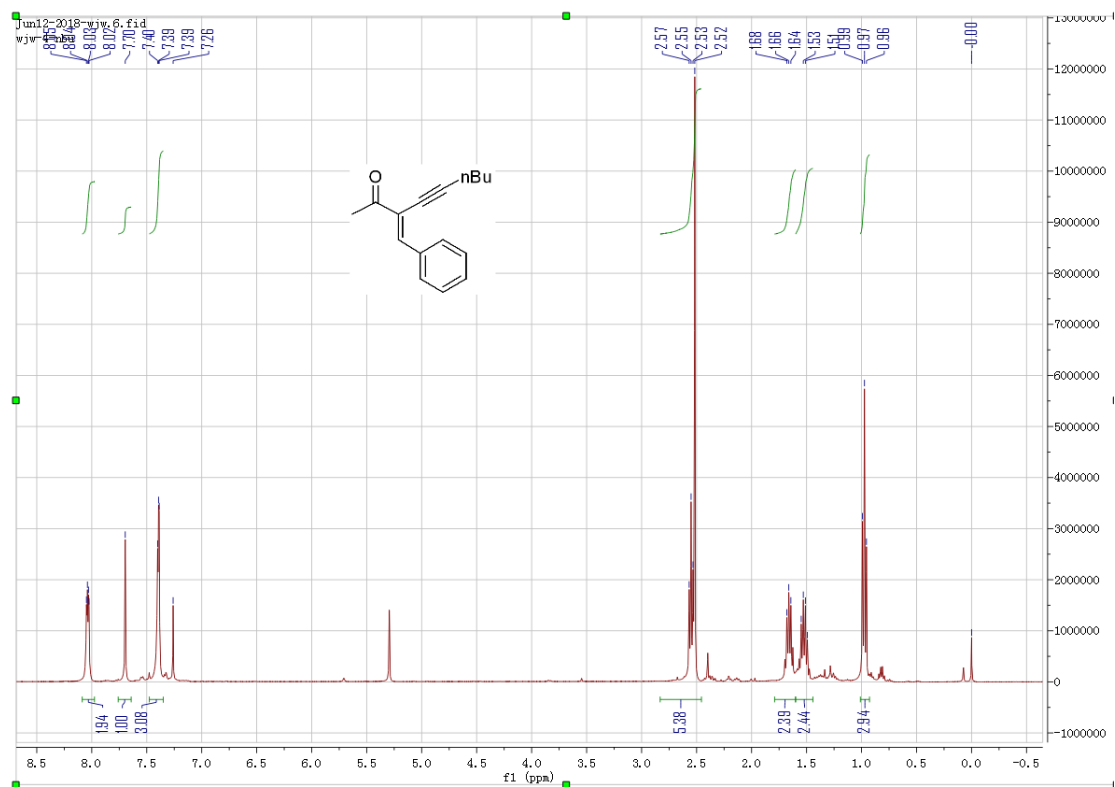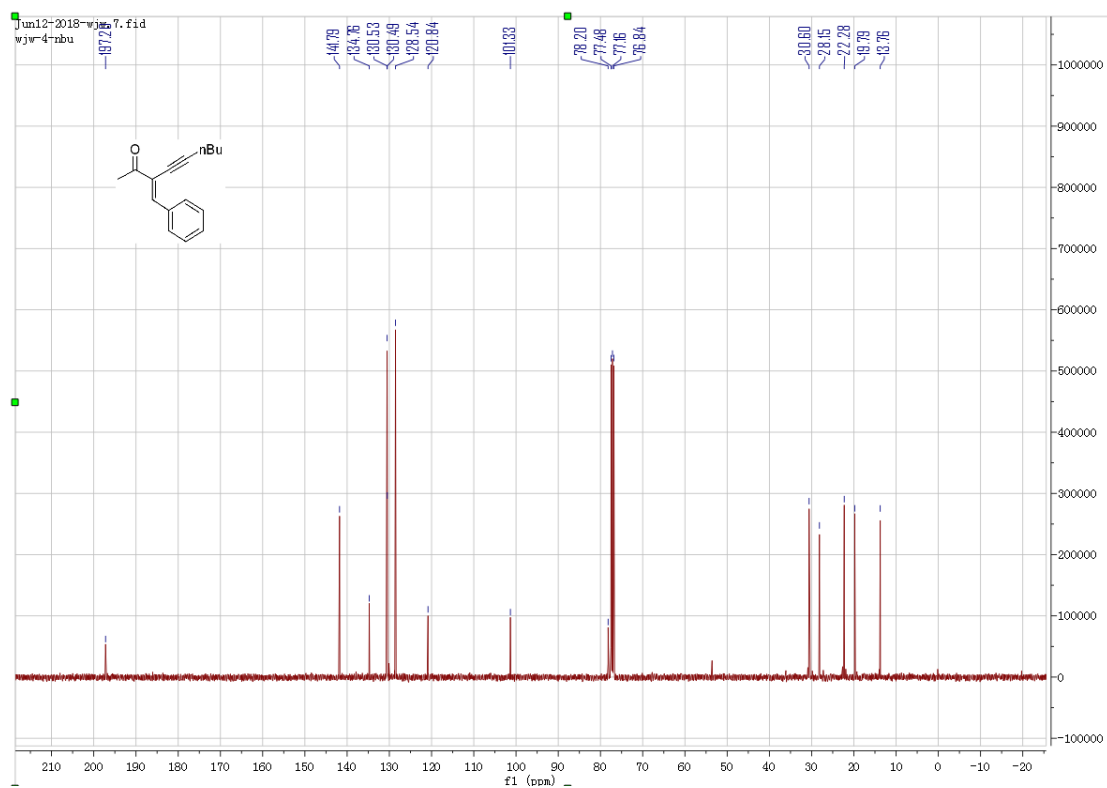

(E)-3-(4-fluorobenzylidene)-5-phenylpent-4-yn-2-one (**1m**)

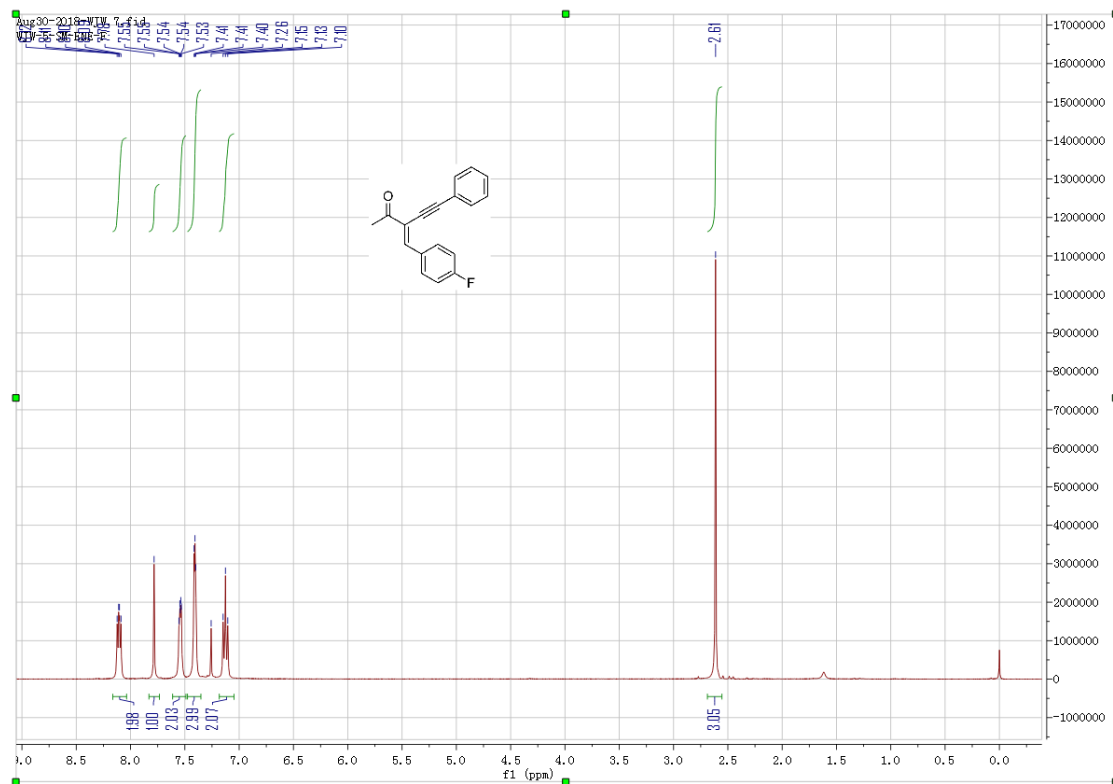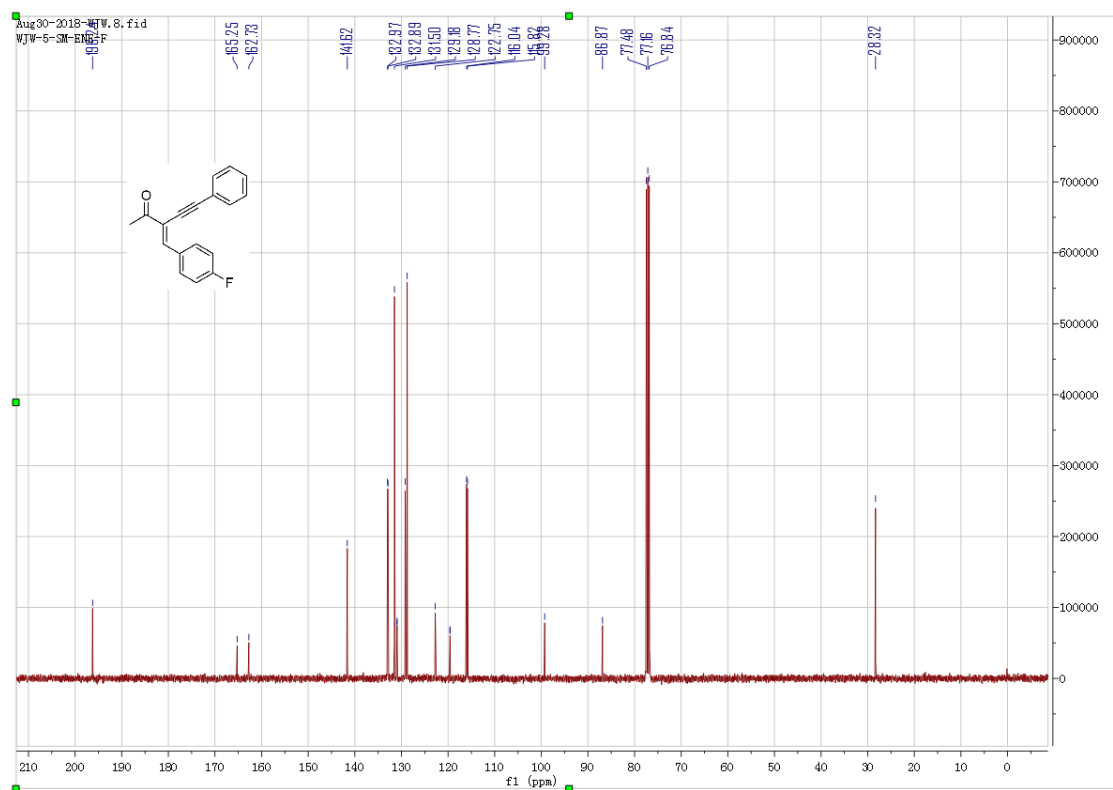

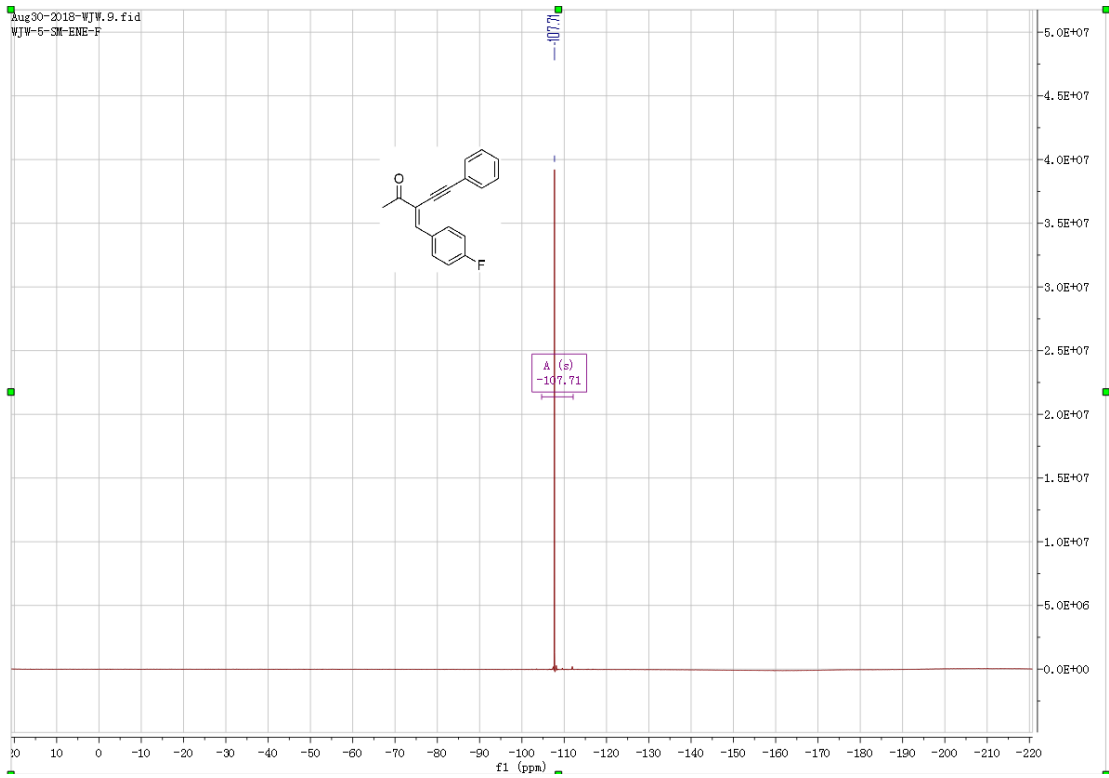



(E)-3-(naphthalen-2-ylmethylene)-5-phenylpent-4-yn-2-one (**1p**)

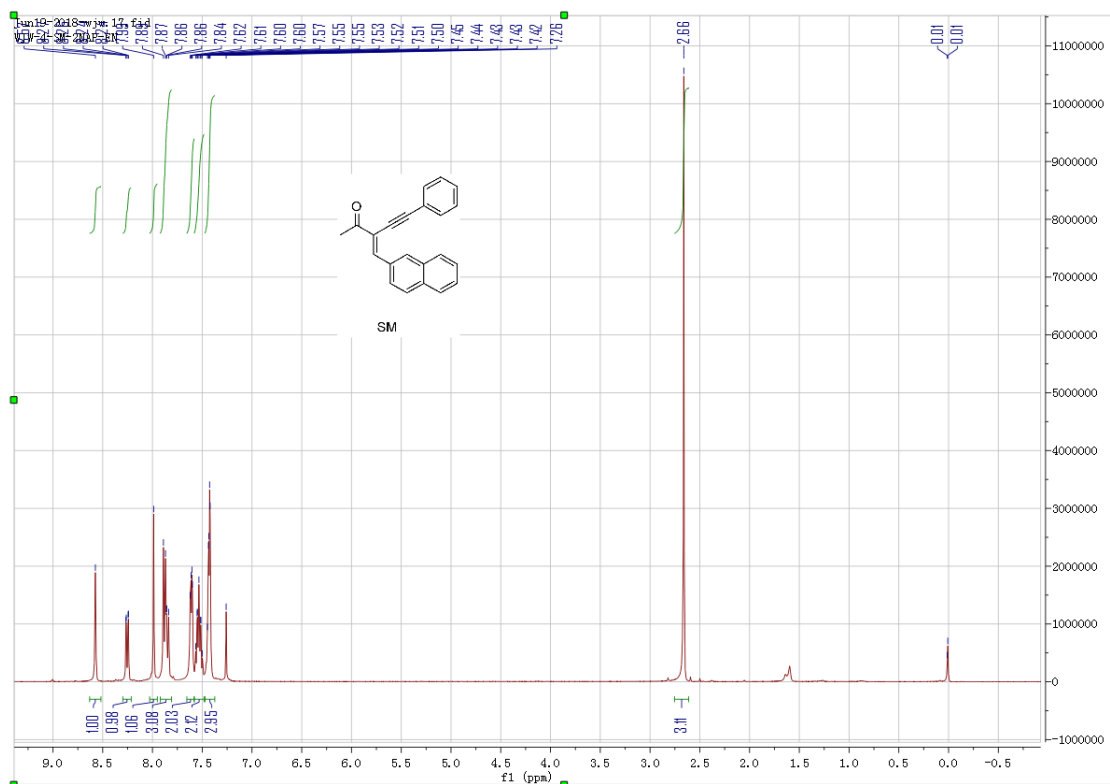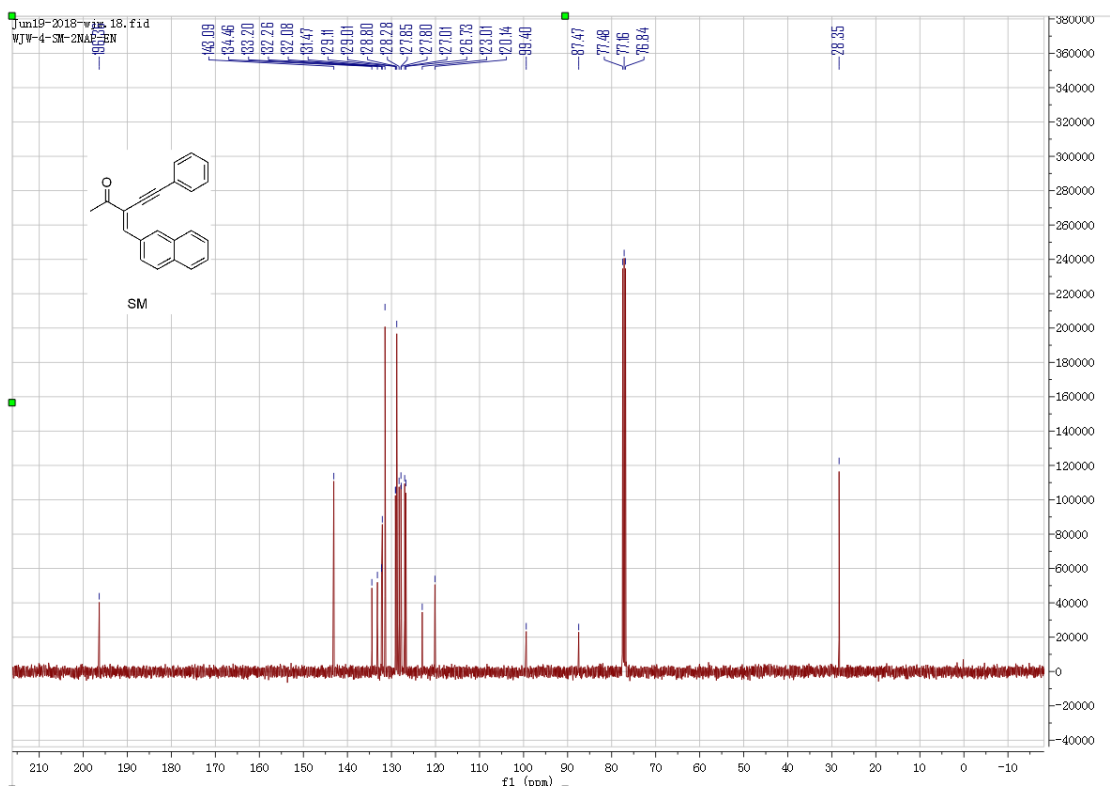

(E)-3-benzylidene-1-phenylhept-1-yn-4-one (**1s**)

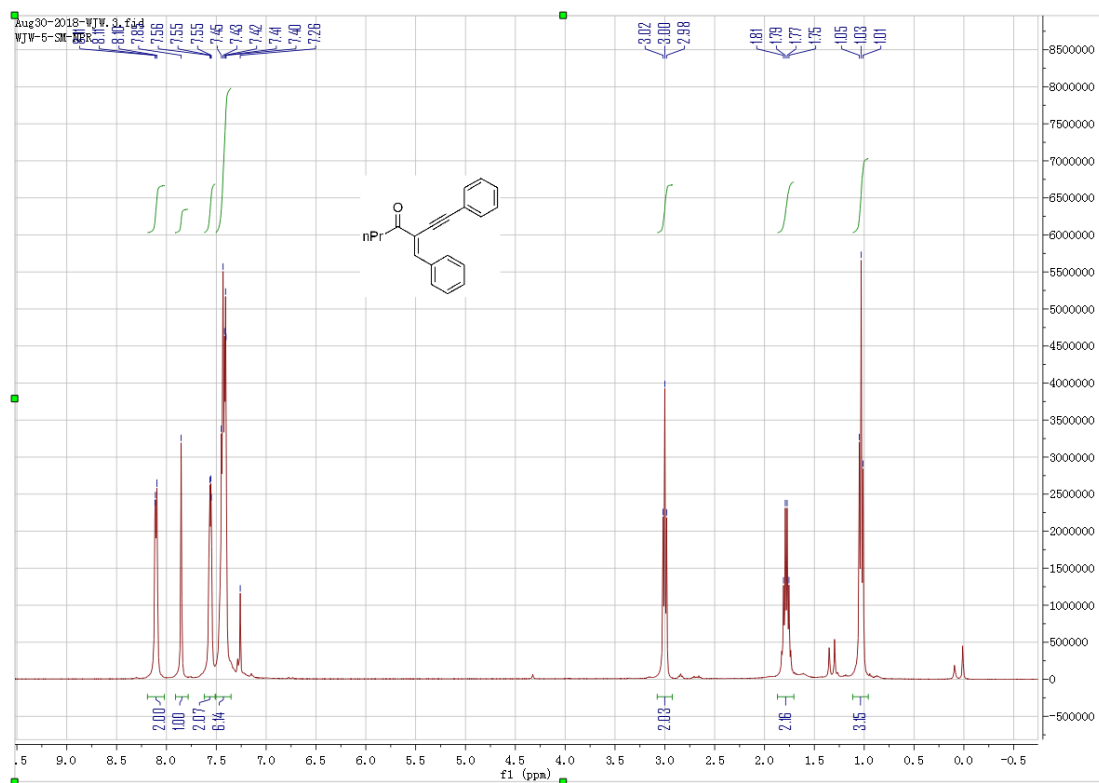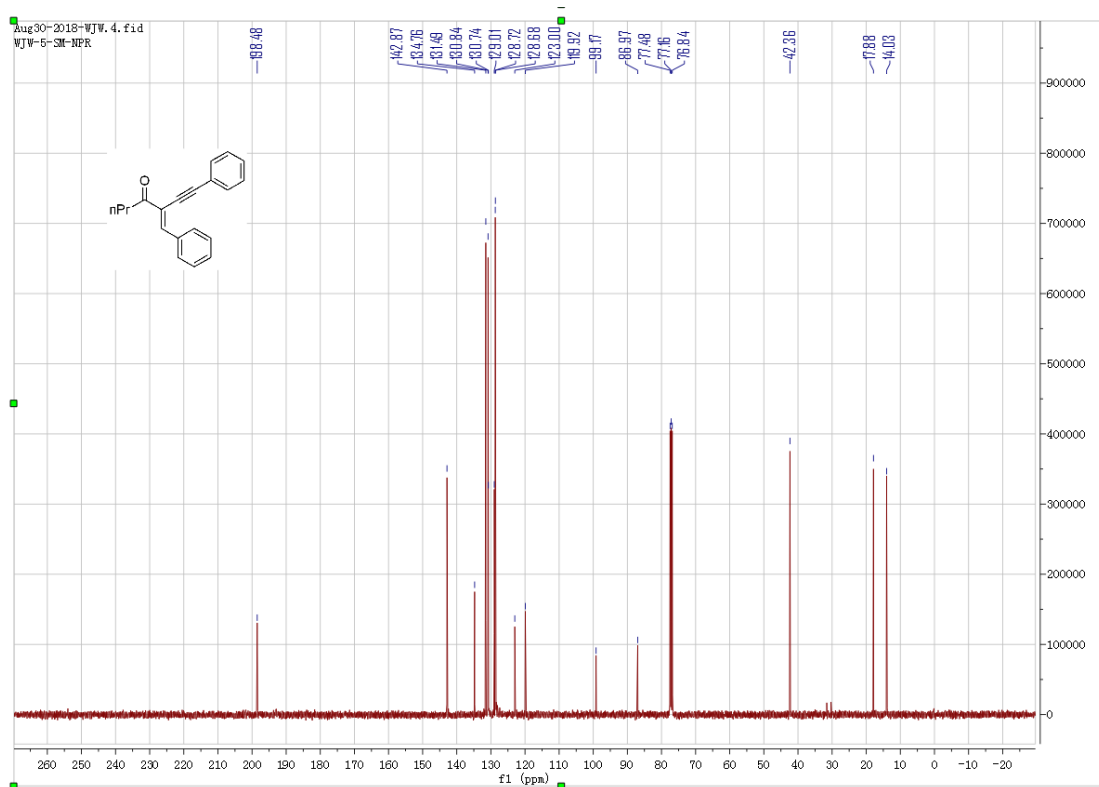

(E)-3-benzylidene-6-methyl-1-phenylhept-1-yn-4-one (**1u**)

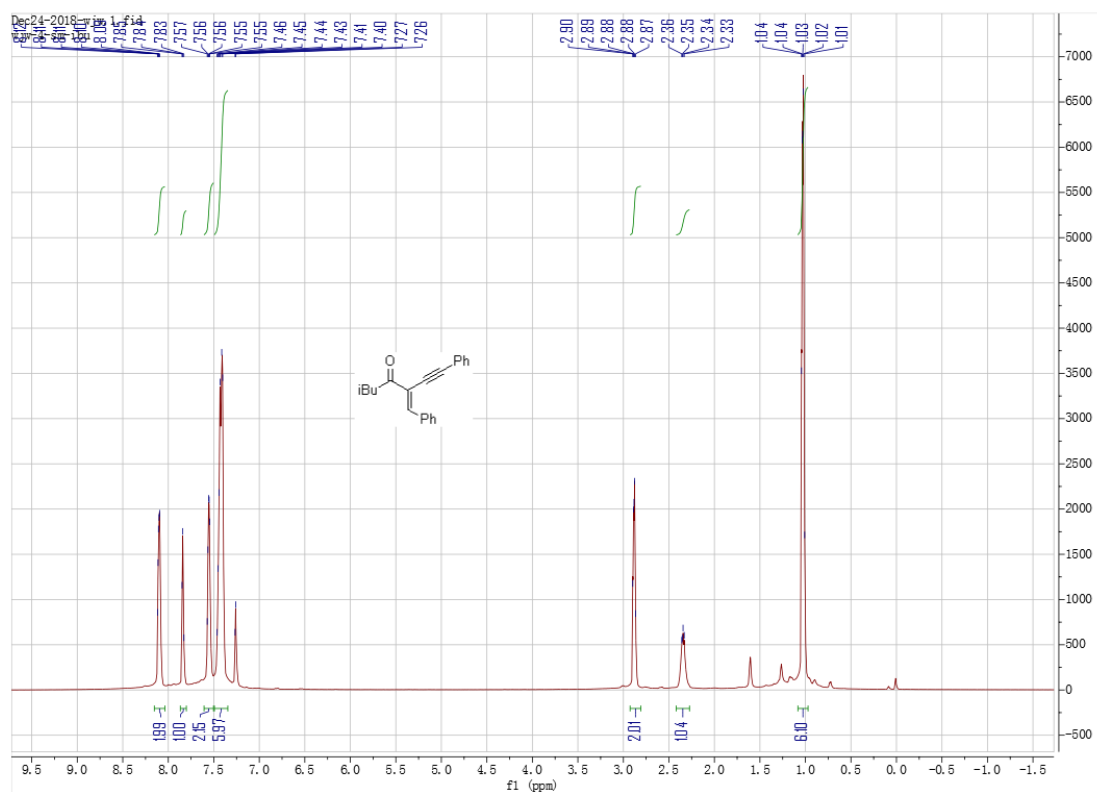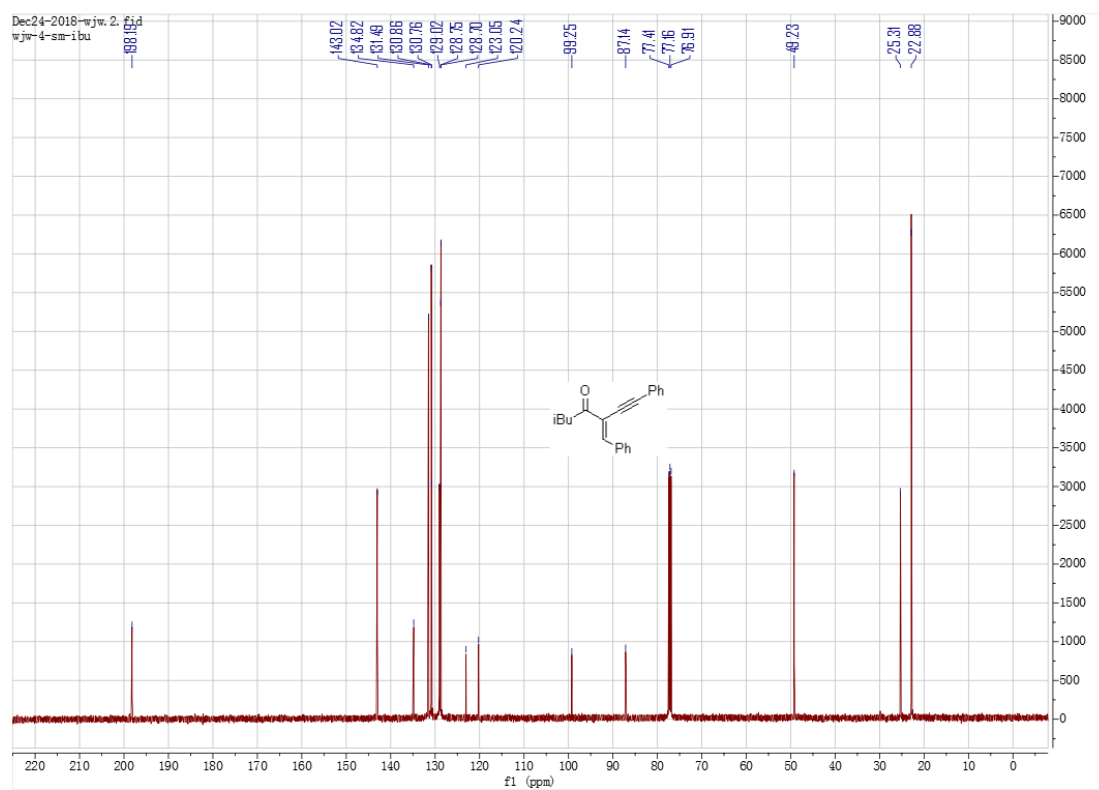

2-(3,5-dimethoxyphenyl)-4-ethyloxazol-5(4H)-one (**2a**)

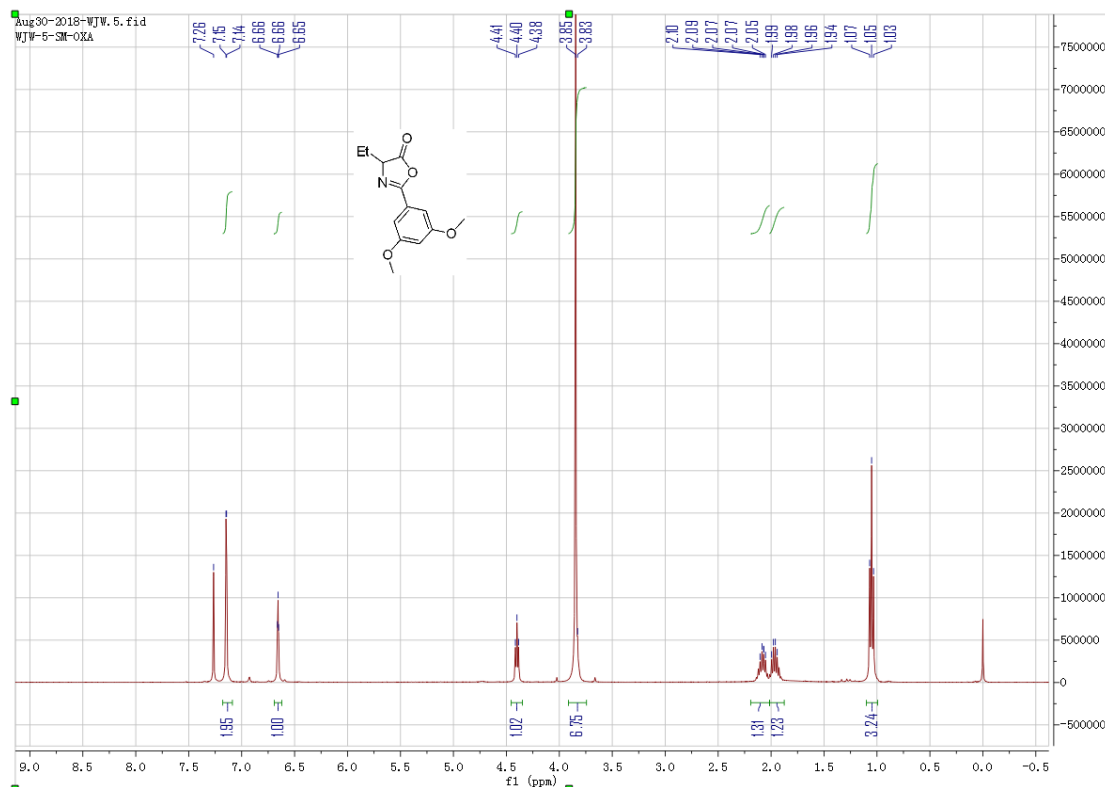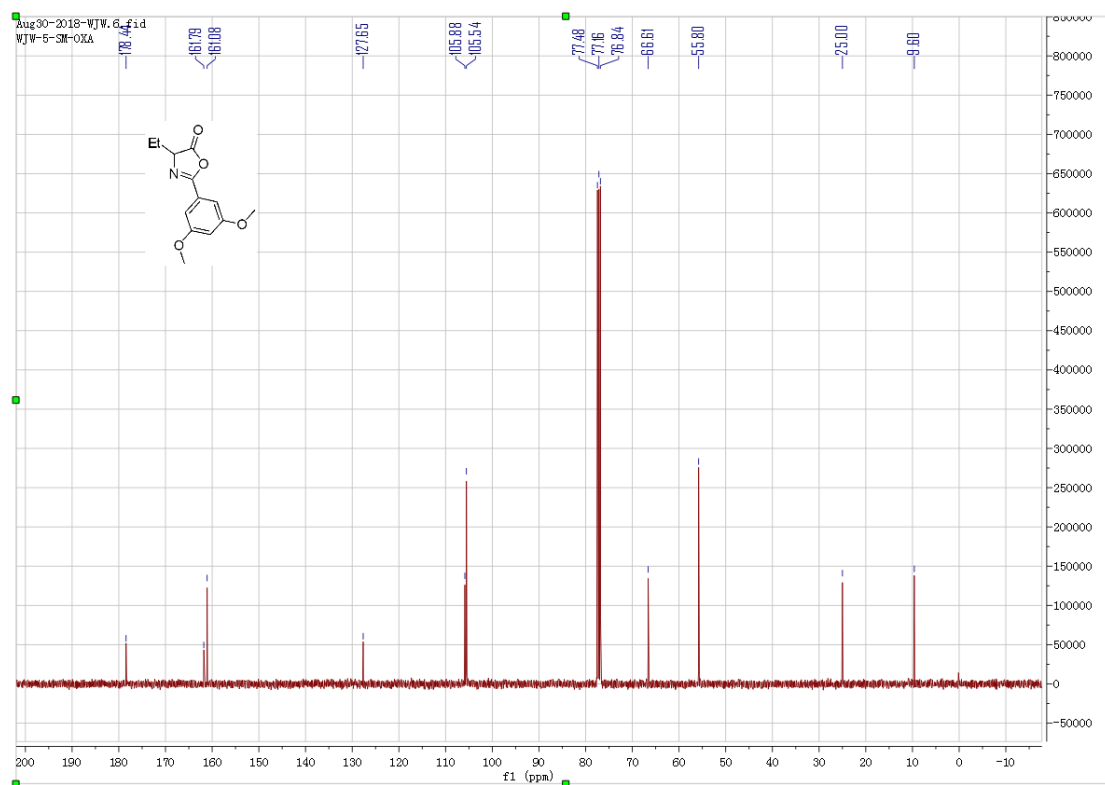

4-Butyl-2-(3,5-dimethoxyphenyl)oxazol-5(4H)-one (2v)

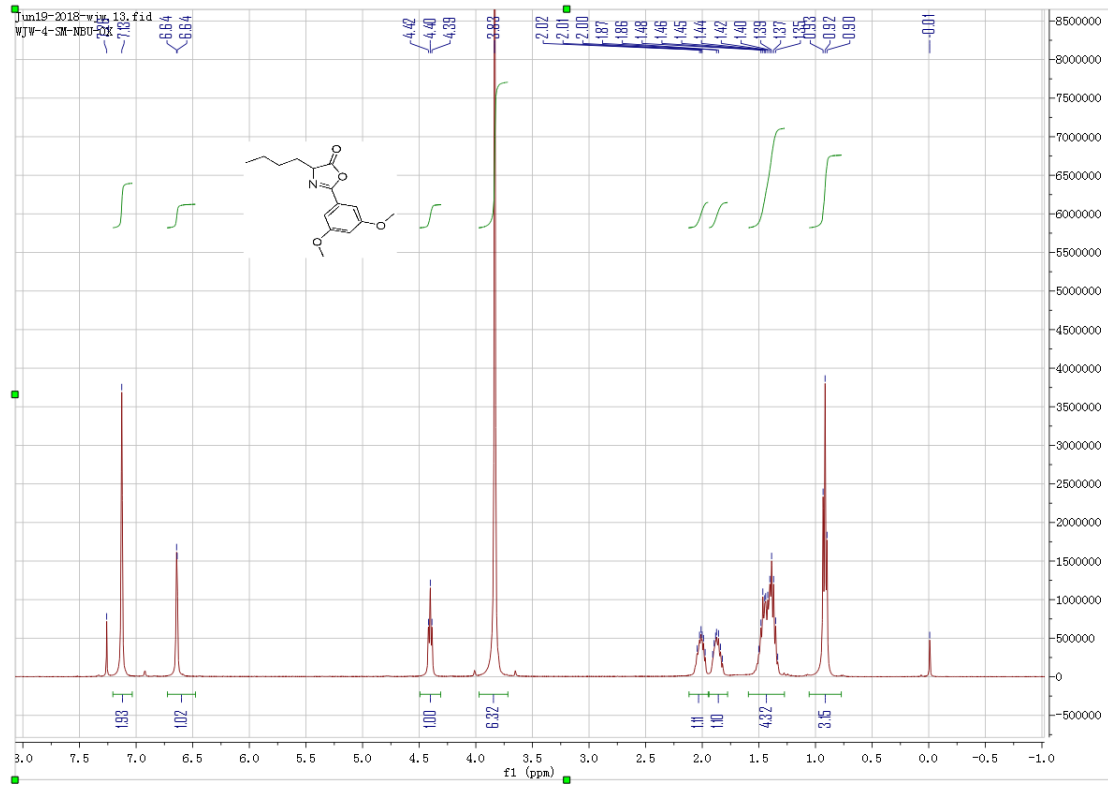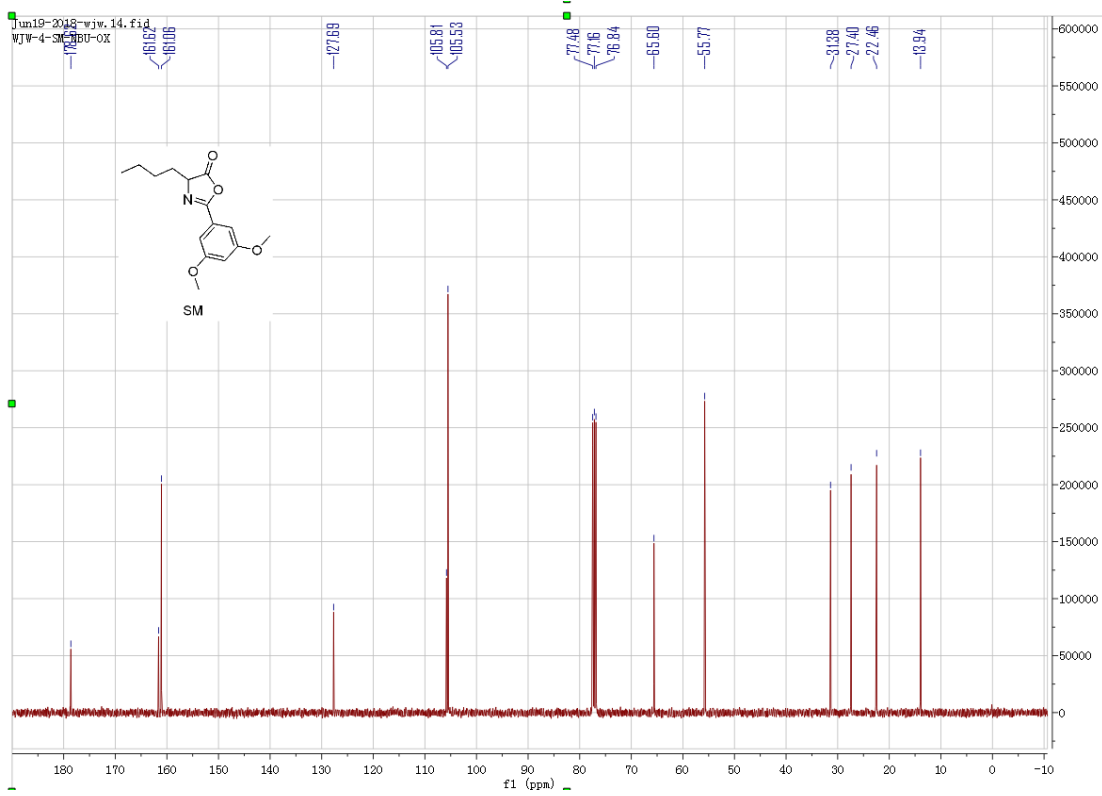

4-benzyl-2-(3,5-dimethoxyphenyl)oxazol-5(4H)-one (2w)

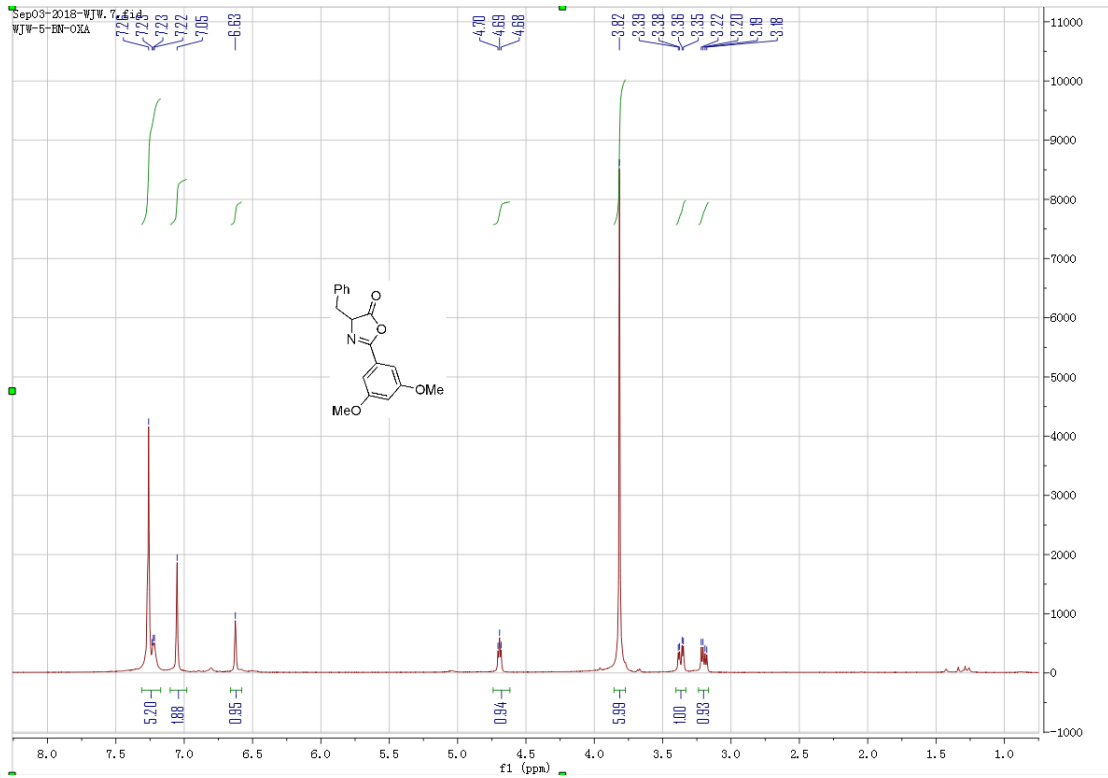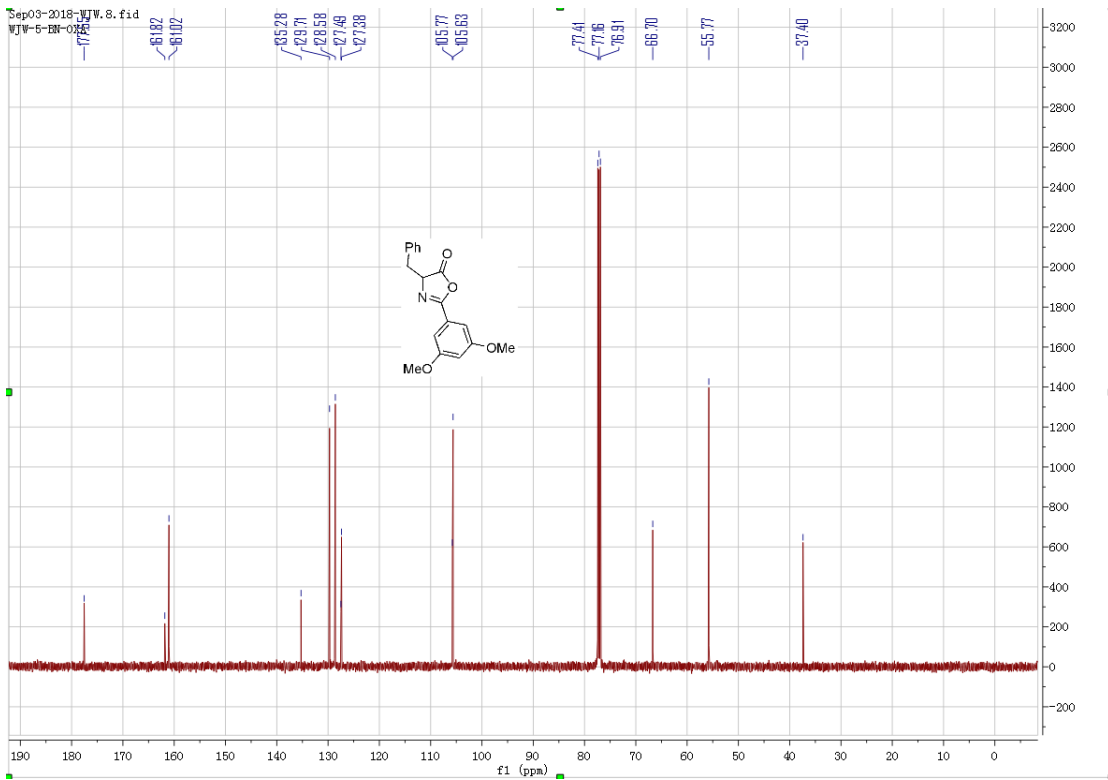

2-(3,5-dimethoxyphenyl)-4-(2-(methylthio)ethyl)oxazol-5(4H)-one (**2x**)

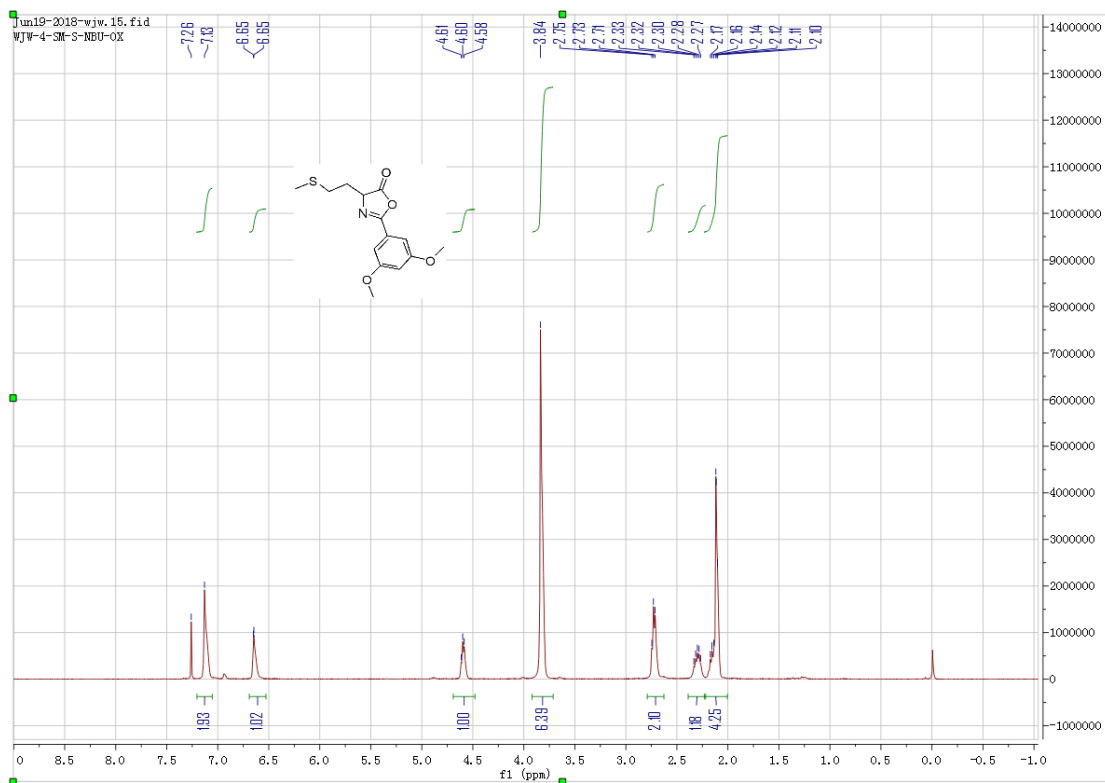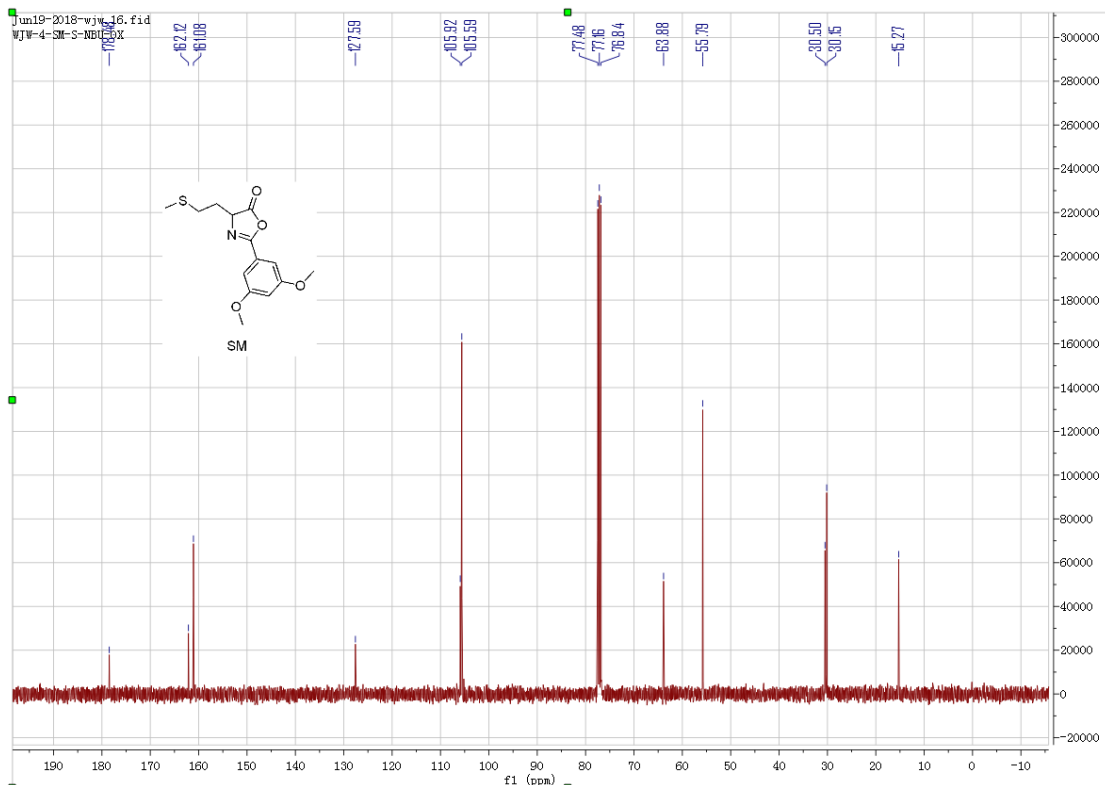

tert-butyl (4-(2-(3,5-dimethoxyphenyl)-5-oxo-4,5-dihydrooxazol-4-yl)butyl)carbamate (**2y**)

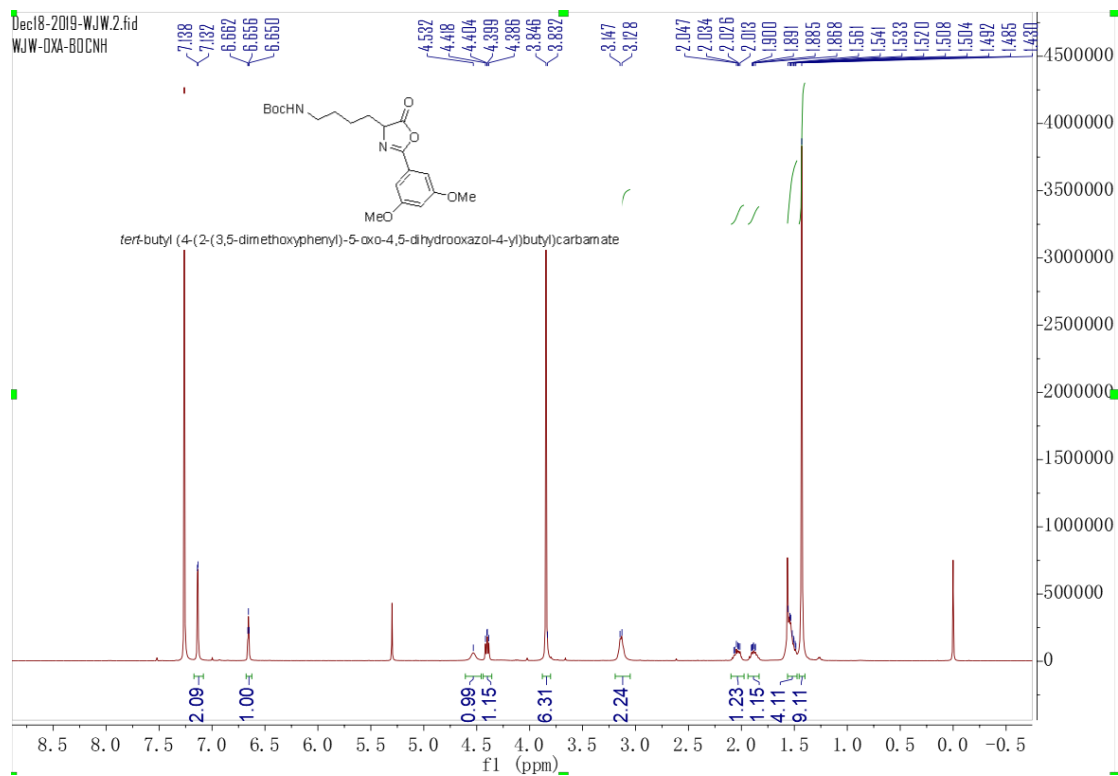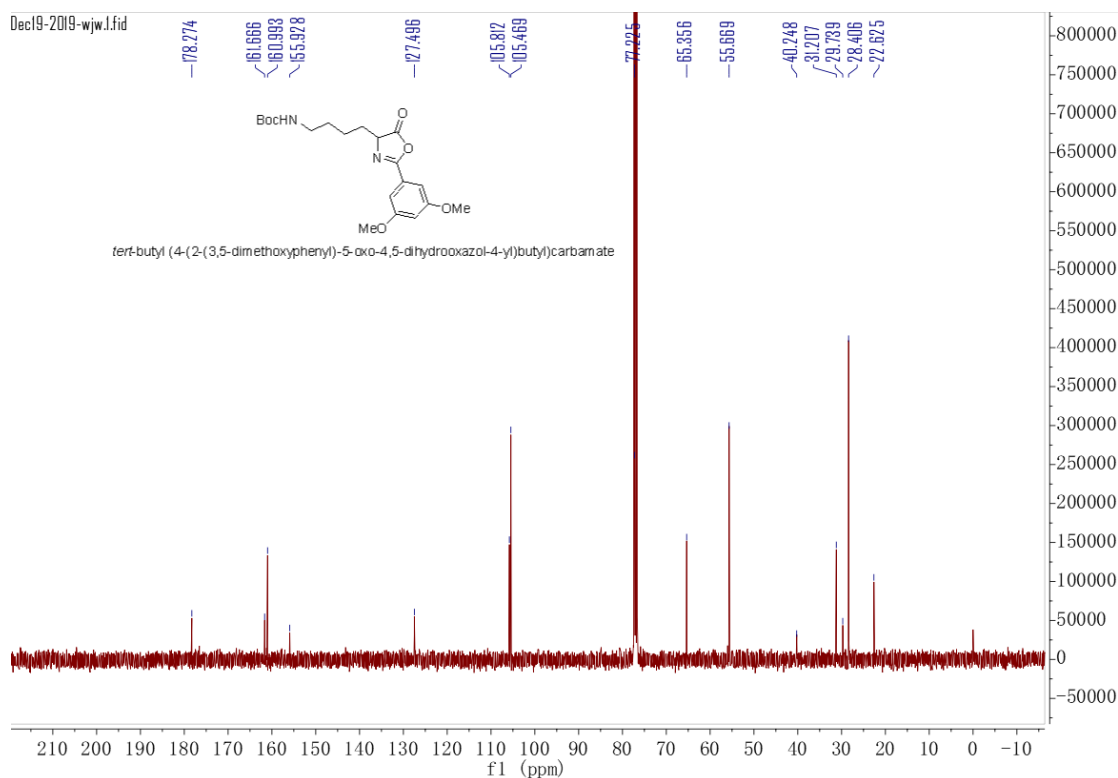



(S)-4-((1R,3R)-2-acetyl-1,4-diphenylbuta-2,3-dien-1-yl)-2-(3,5-dimethoxyphenyl)-4-ethylloxazol-5(4H)-one (3a)

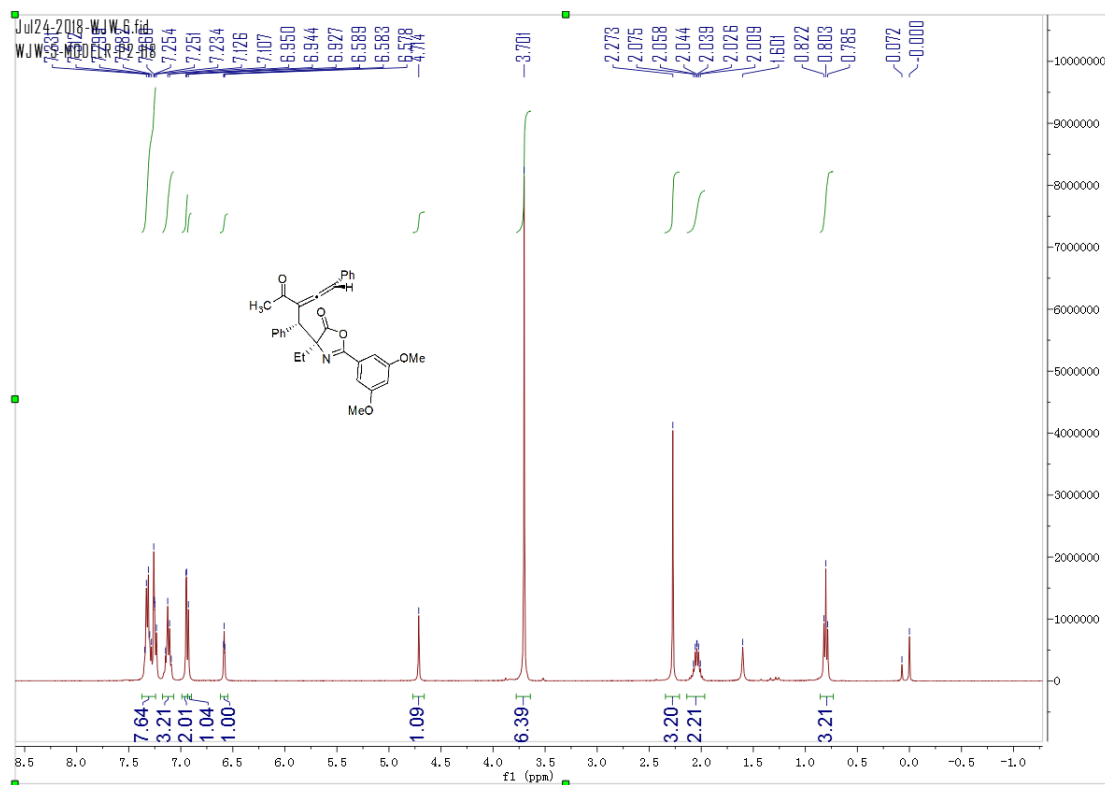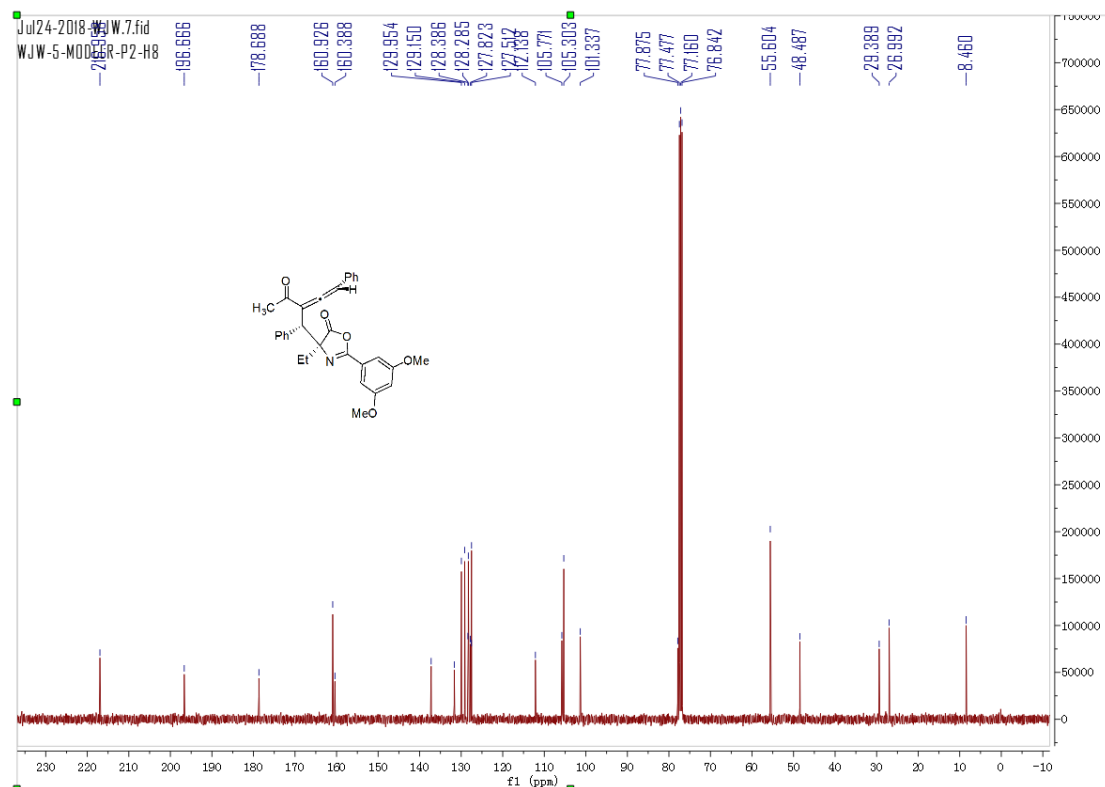

(S)-4-((1*R*,3*R*)-2-acetyl-1-phenyl-4-(p-tolyl)buta-2,3-dien-1-yl)-2-(3,5-dimethoxyphenyl)-4-ethyloxazolidin-5(4*H*)-one (**3b**)

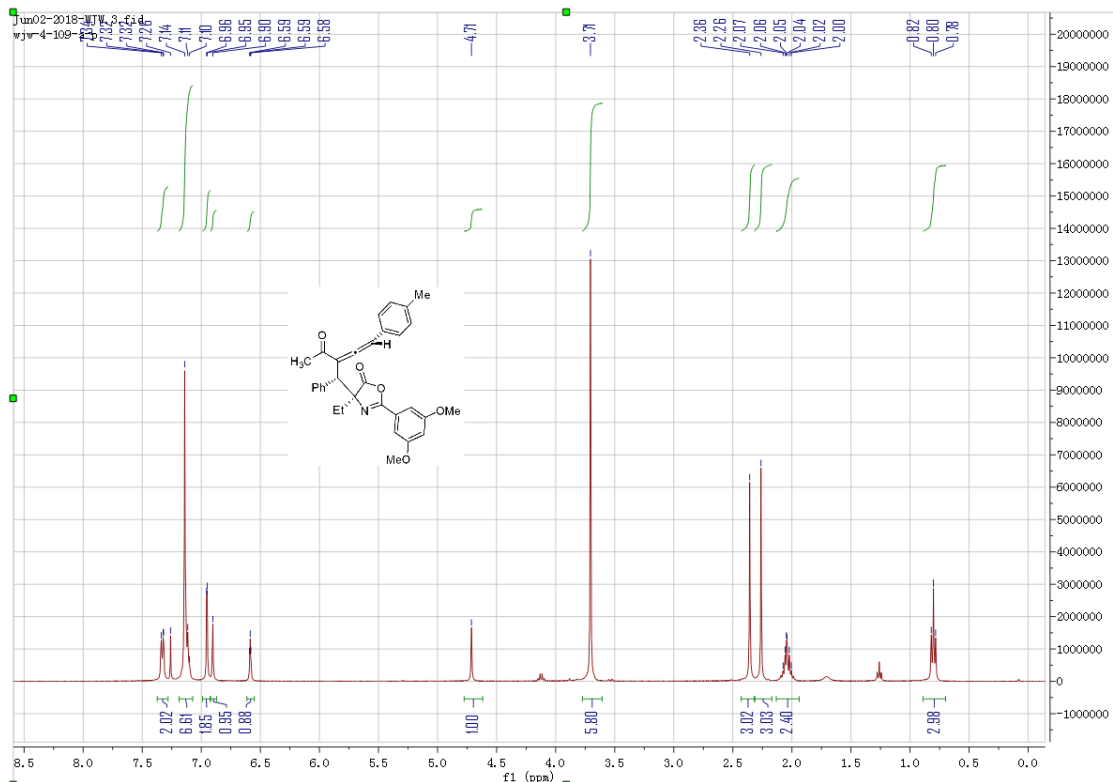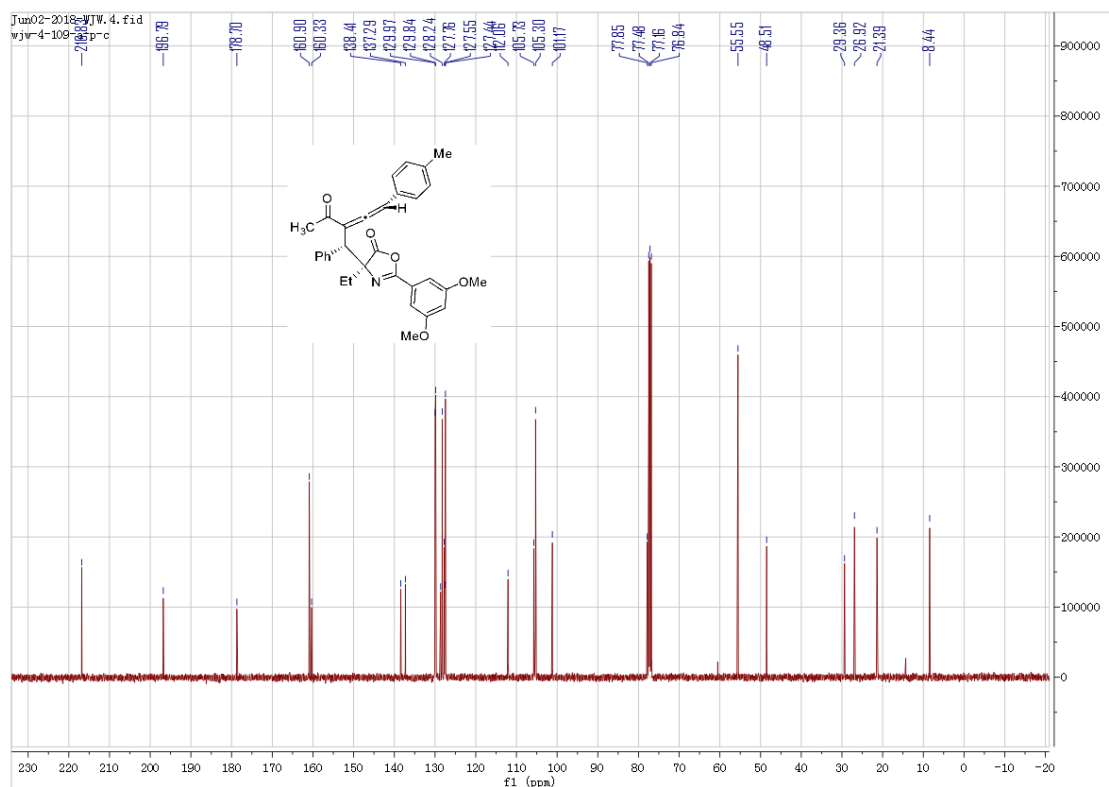

(S)-4-((1*R*,3*R*)-2-acetyl-4-(4-chlorophenyl)-1-phenylbuta-2,3-dien-1-yl)-2-(3,5-dimethoxyphenyl)-4-ethyl-5-hydroxazol-5(4*H*)-one (**3c**)

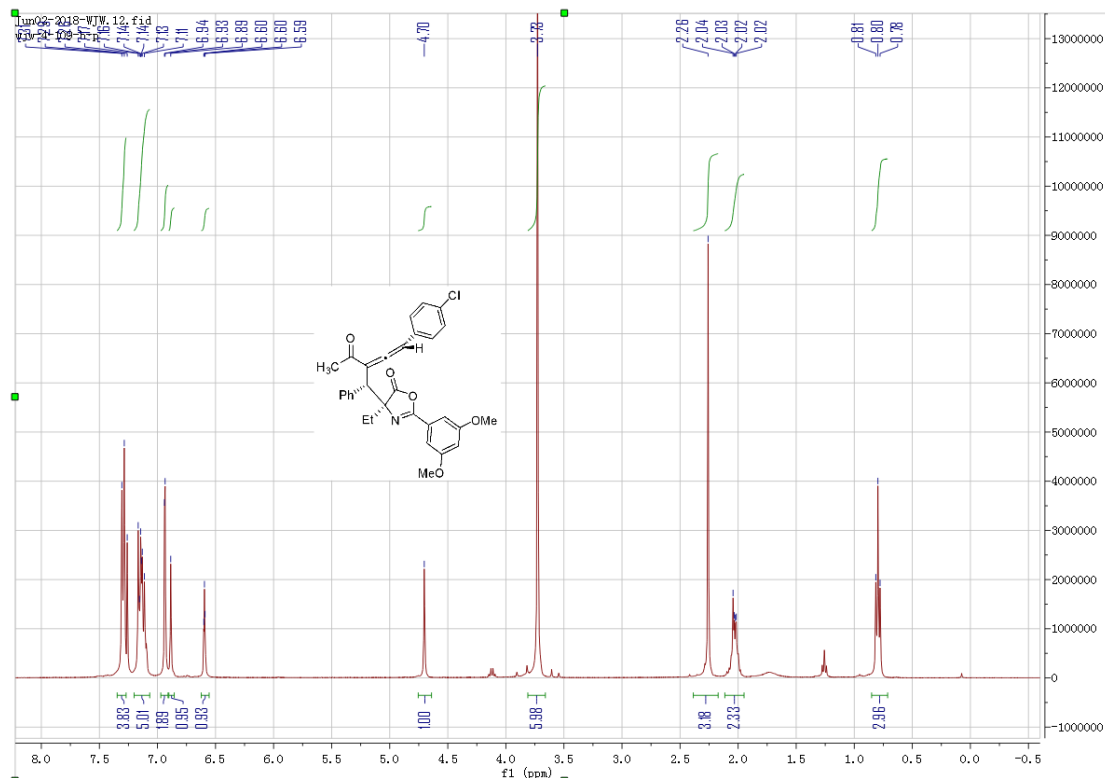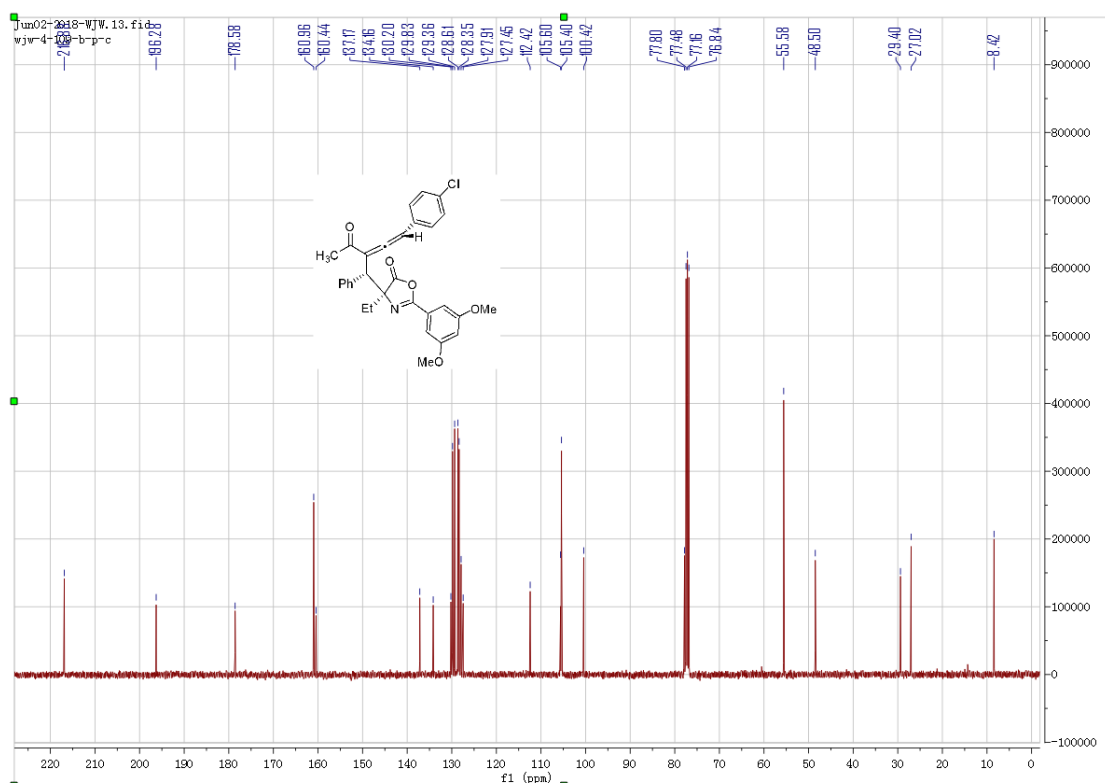

(S)-4-((1*R*,3*R*)-2-acetyl-4-(4-methoxyphenyl)-1-phenylbuta-2,3-dien-1-yl)-2-(3,5-dimethoxyphenyl)-4-ethoxazol-5(4*H*)-one (**3d**)

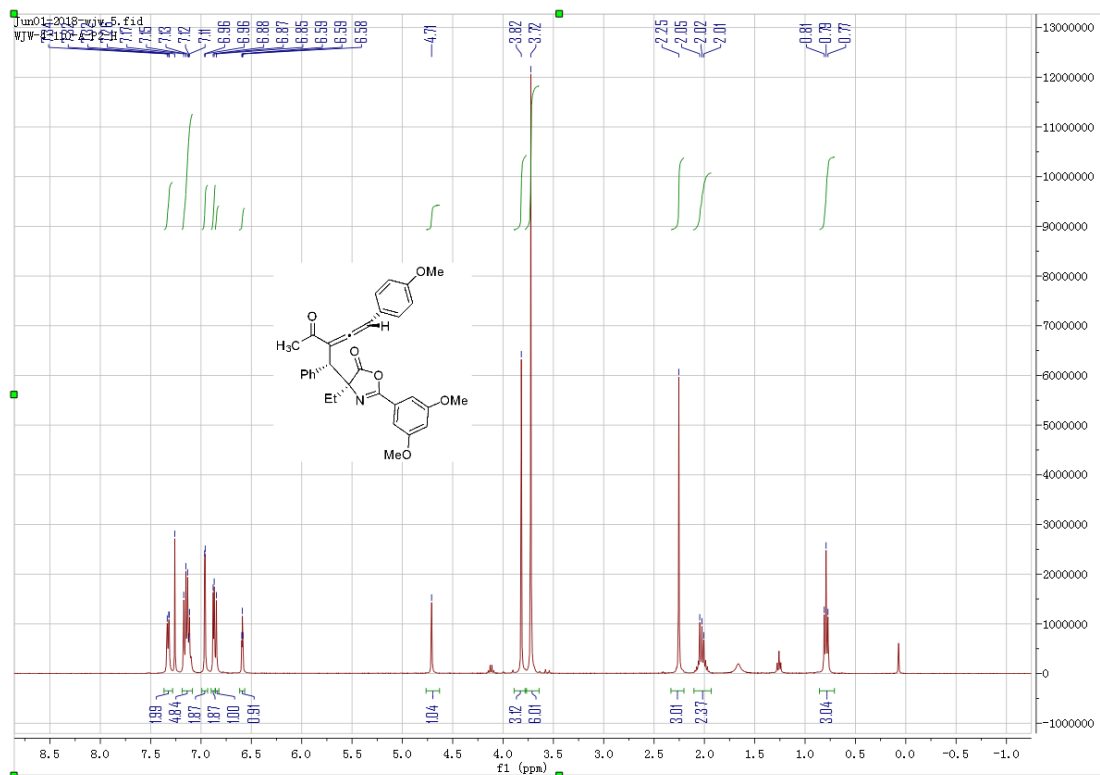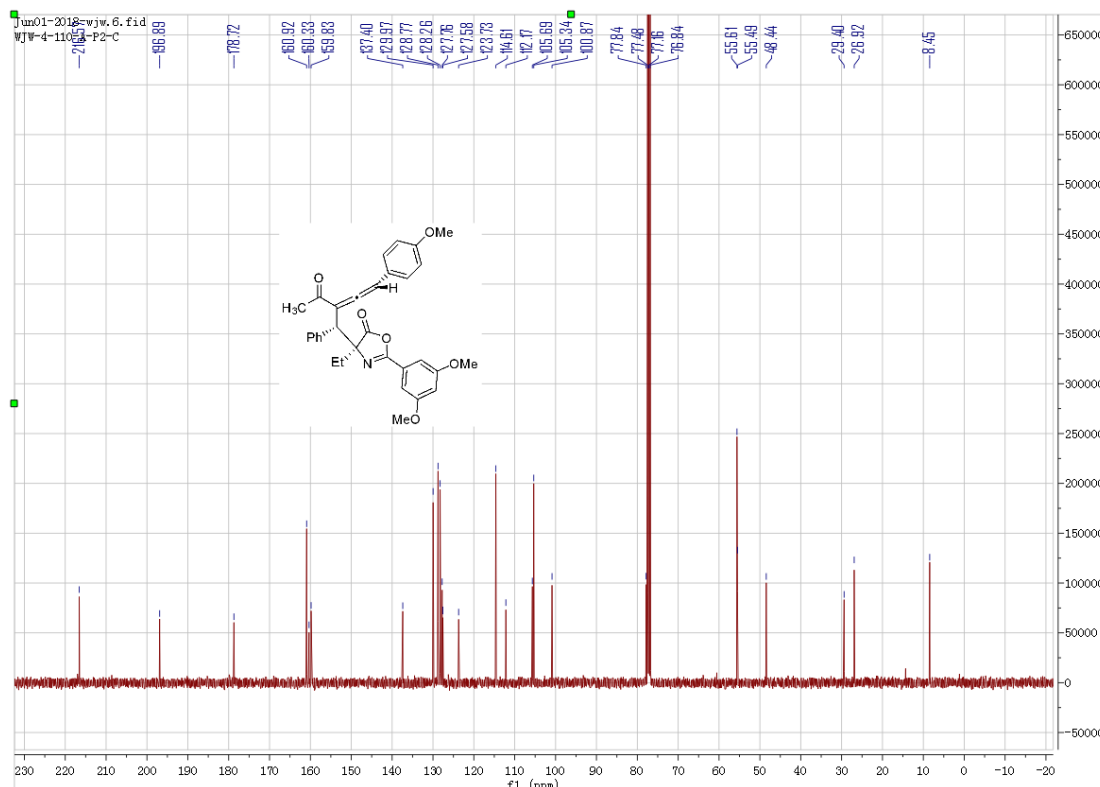

(S)-4-((1R,3R)-2-acetyl-4-(4-fluorophenyl)-1-phenylbuta-2,3-dien-1-yl)-2-(3,5-dimethoxyphenyl)-4-ethyloxazol-5(4H)-one (**3e**)

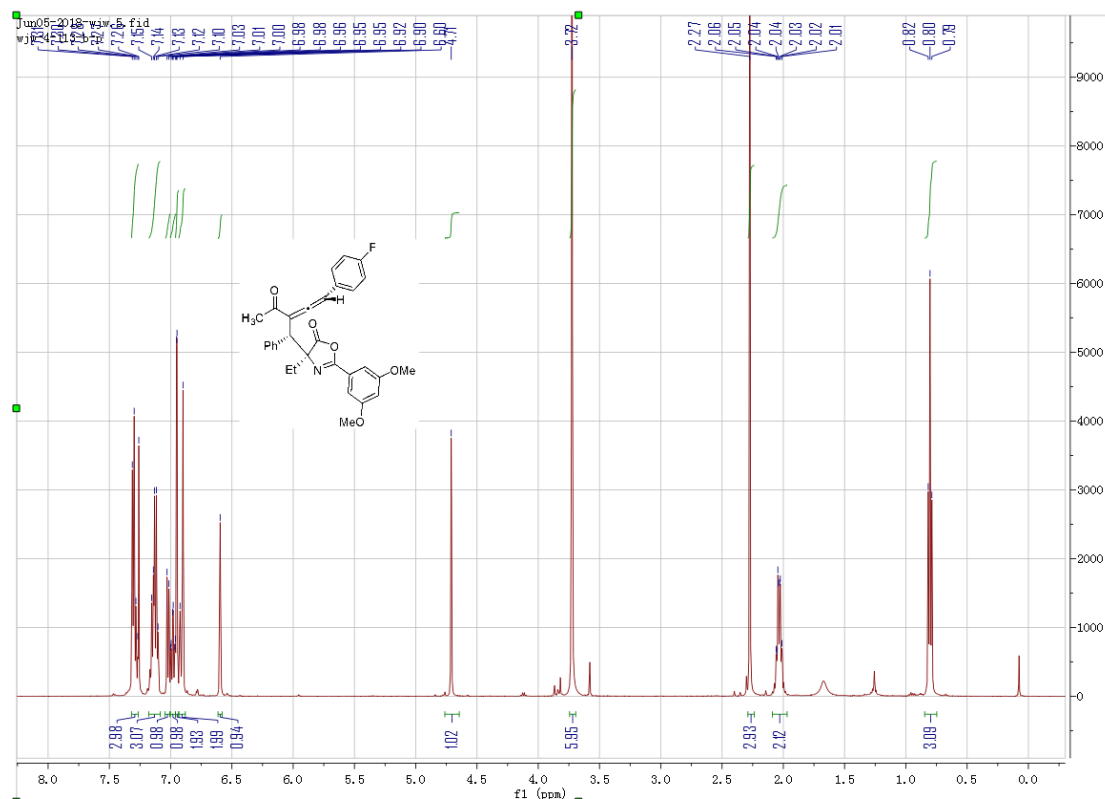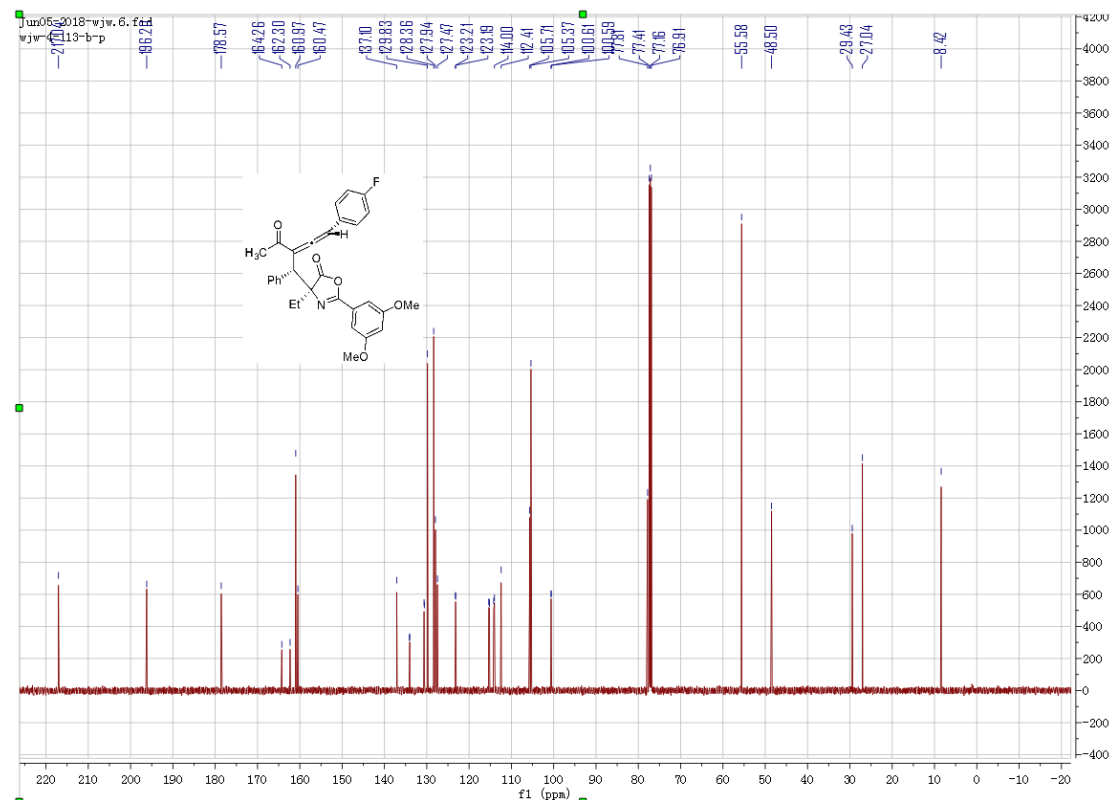

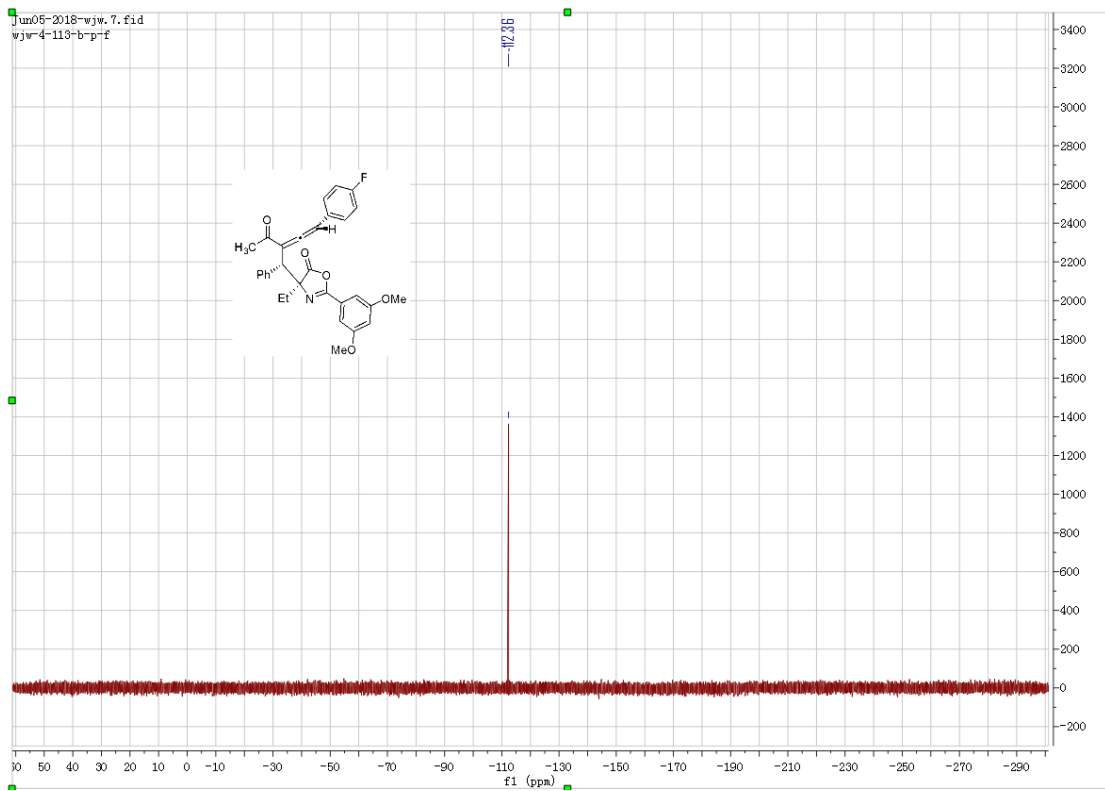

(S)-4-((1*R*,3*R*)-2-acetyl-1-phenyl-4-(4-(trifluoromethyl)phenyl)buta-2,3-dien-1-yl)-2-(3,5-dimethoxyphenyl)-4-ethyloxazol-5(4*H*)-one (**3f**)

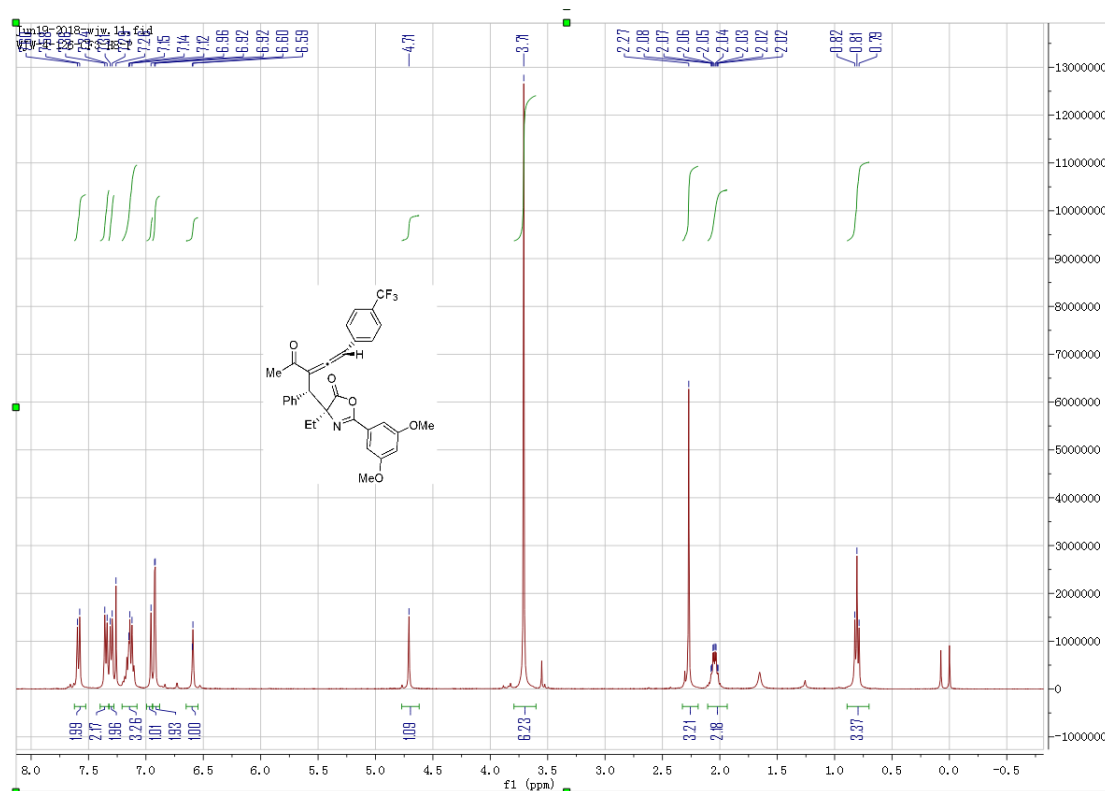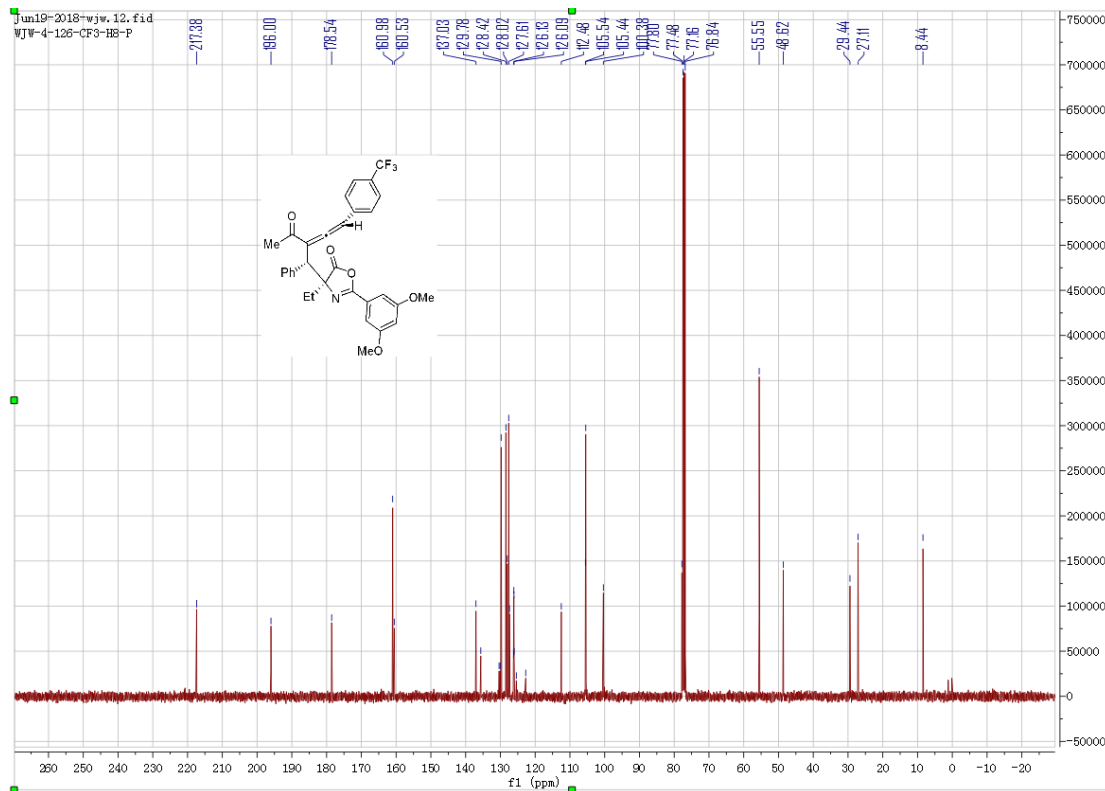

Jun16-2018-WJW.6.fid  
WJW-4-126-CF3-B8

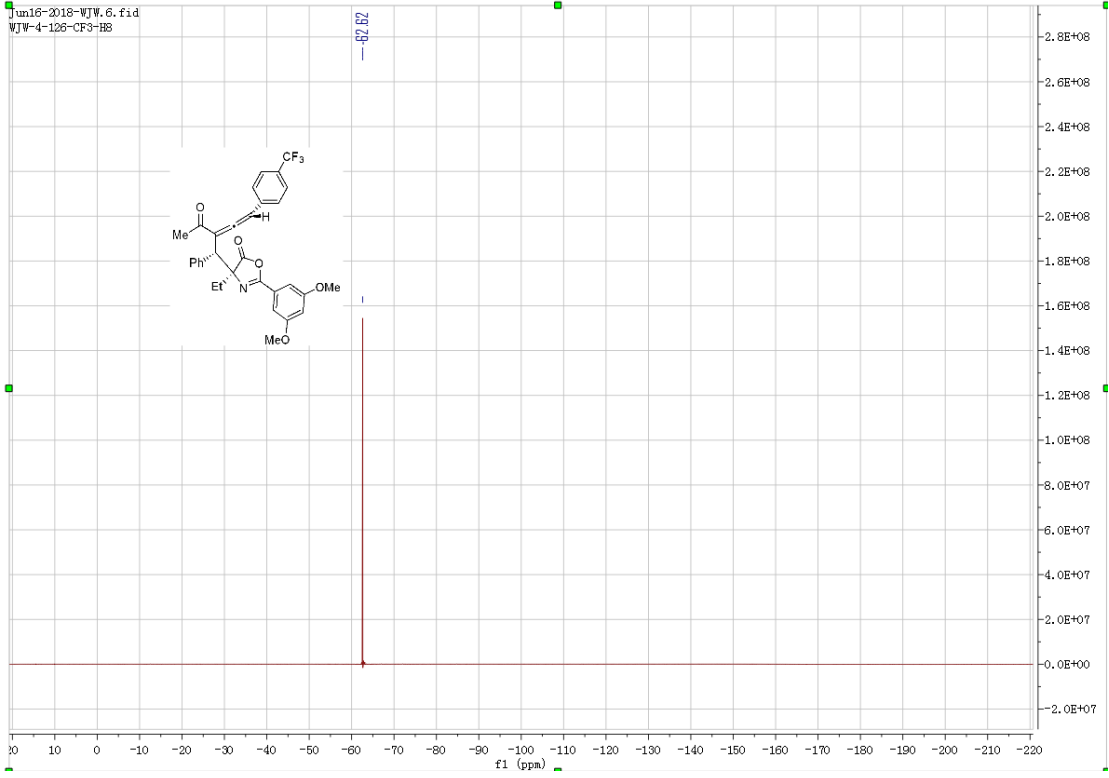



Methyl 3-((R)-3-((R)-((S)-2-(3,5-dimethoxyphenyl)-4-ethyl-5-oxo-4,5-dihydrooxazol-4-yl)

(phenyl)methyl)-4-oxopenta-1,2-dien-1-yl)benzoate (**3g**)

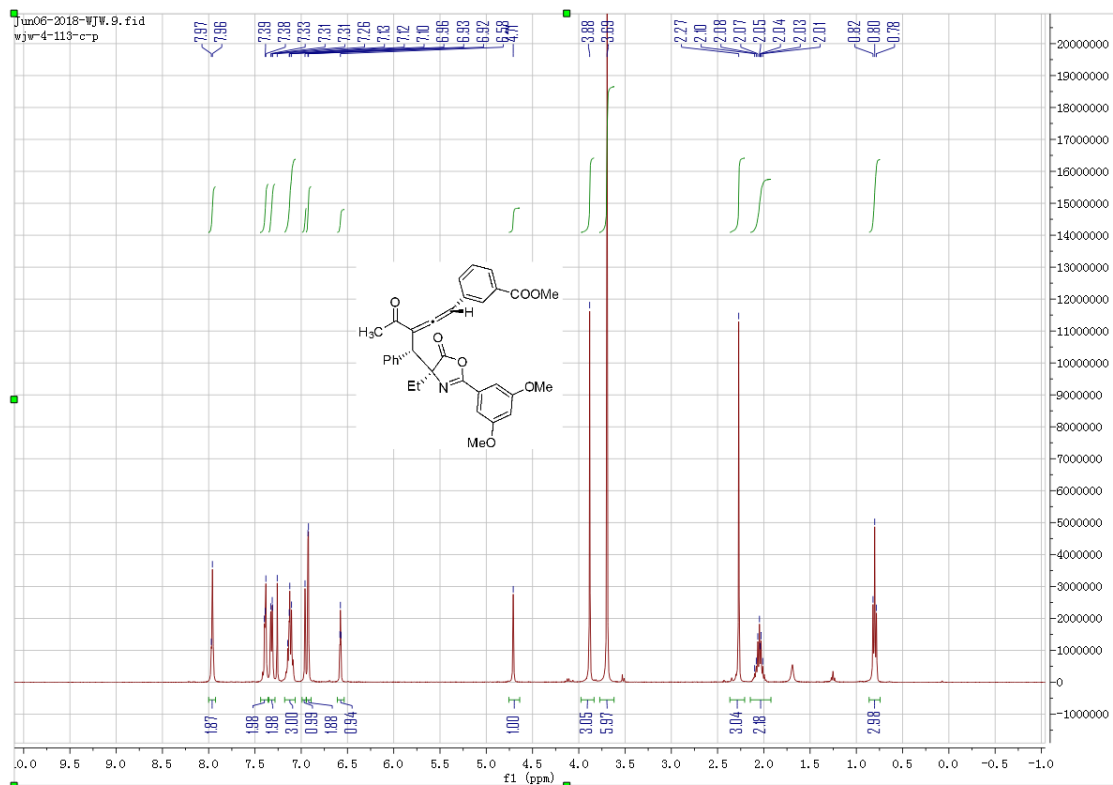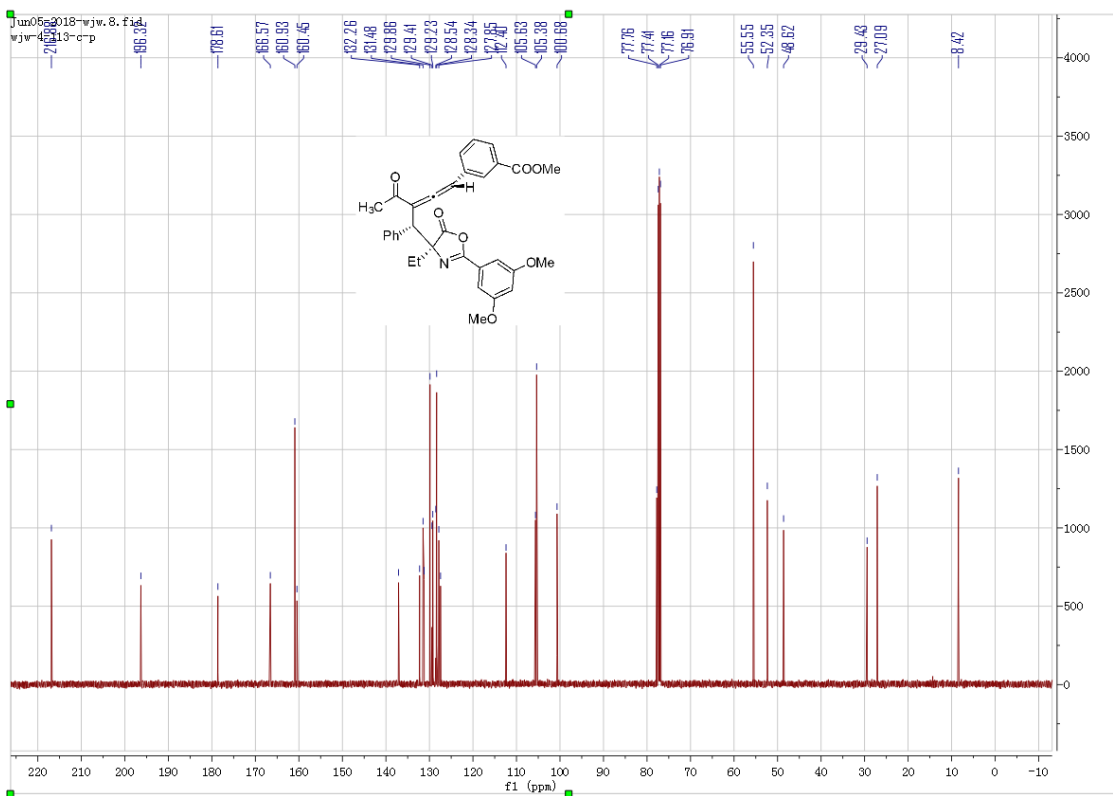

(S)-4-((1*R*,3*R*)-2-acetyl-4-(2-chlorophenyl)-1-phenylbuta-2,3-dien-1-yl)-2-(3,5-dimethoxyphenyl)-4-ethoxyloxazol-5(4*H*)-one (**3h**)

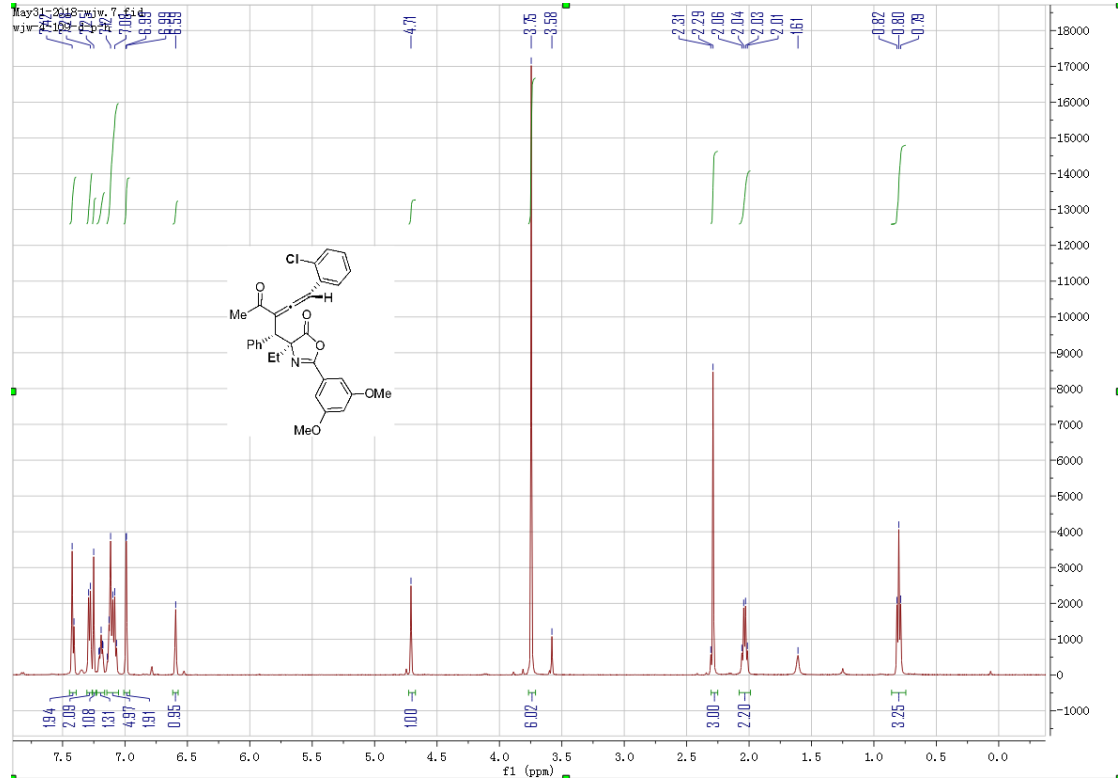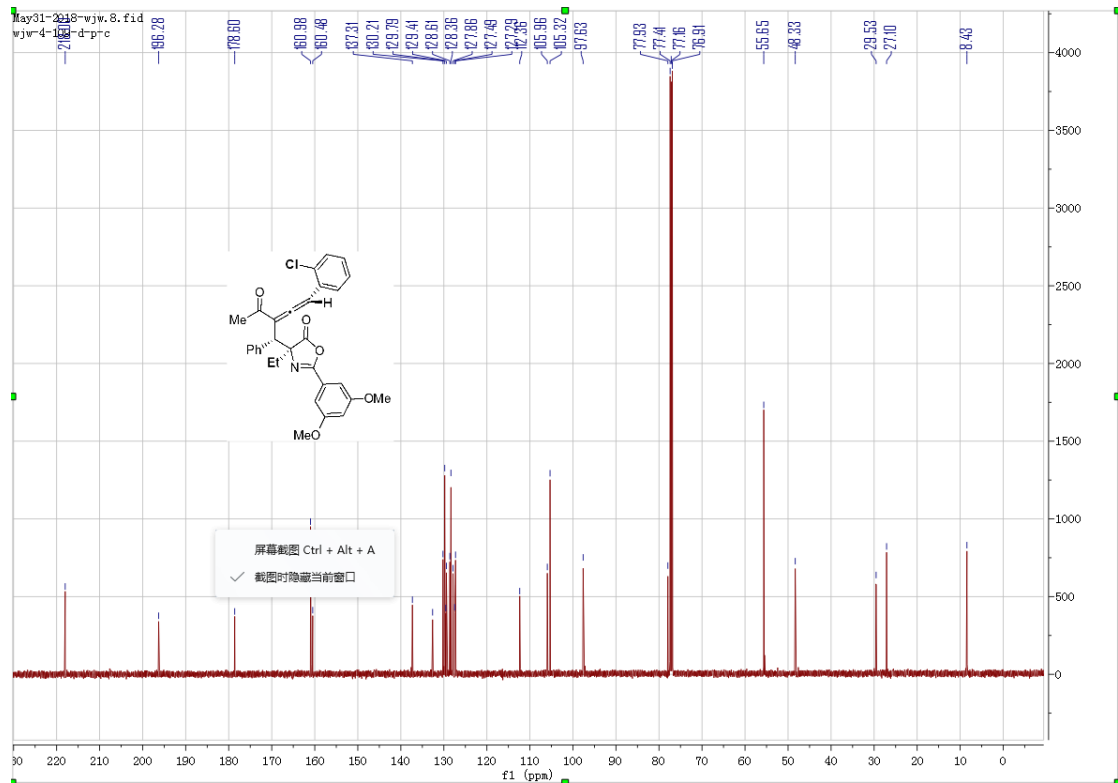

(S)-4-((1*R*,3*R*)-2-acetyl-1-phenyl-4-(thiophen-3-yl)buta-2,3-dien-1-yl)-2-(3,5-dimethoxyphenyl)-4-ethylloxazol-5(4*H*)-one (**3i**)

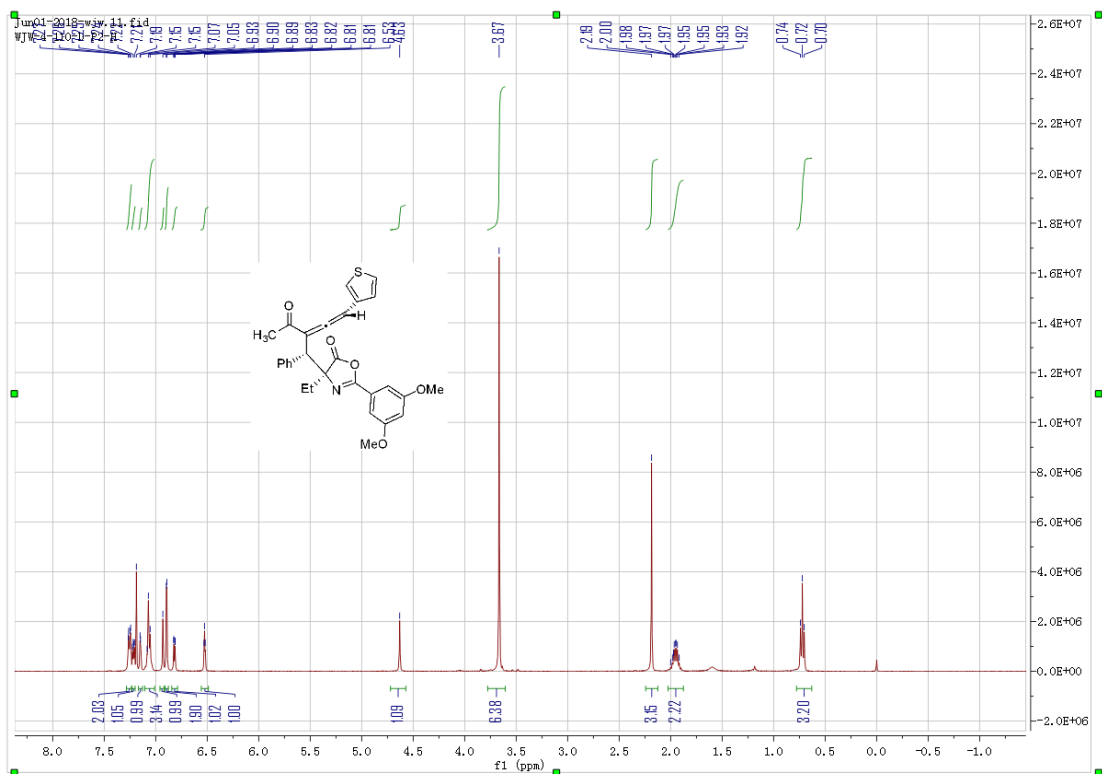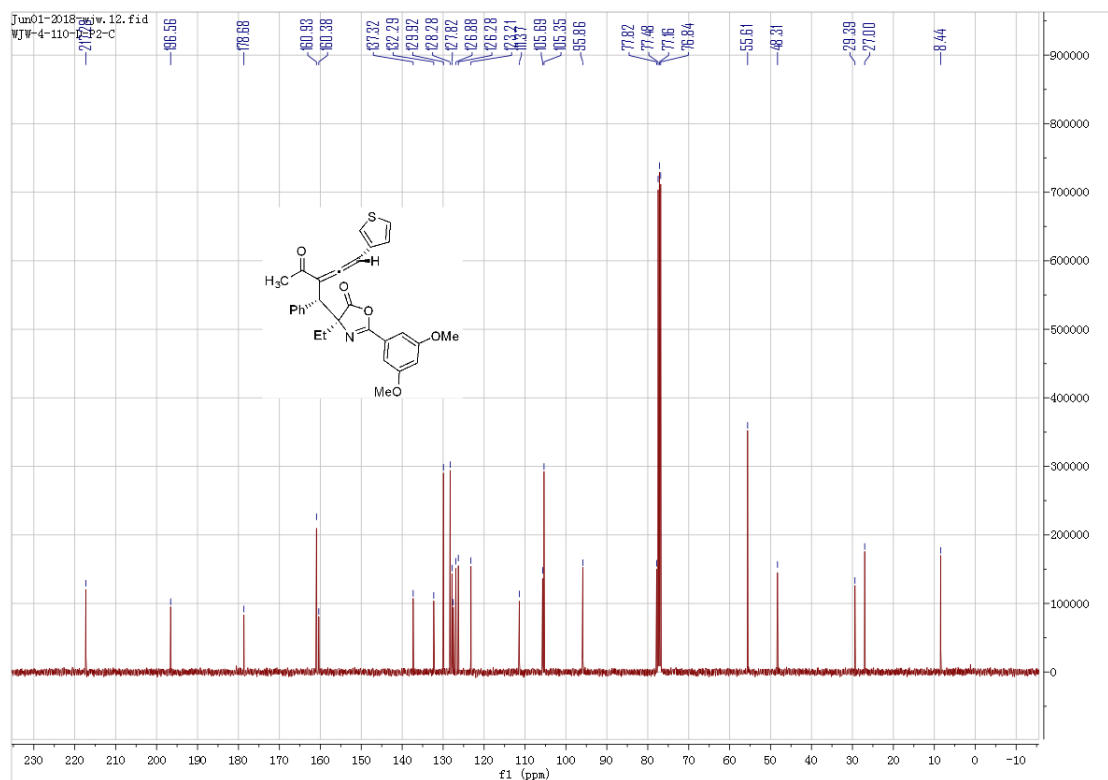

(S)-4-((1R,3R)-2-acetyl-4-(cyclohex-1-en-1-yl)-1-phenylbuta-2,3-dien-1-yl)-2-(3,5-dimethoxyphenyl)-4-ethyloxazol-5(4H)-one (**3j**)

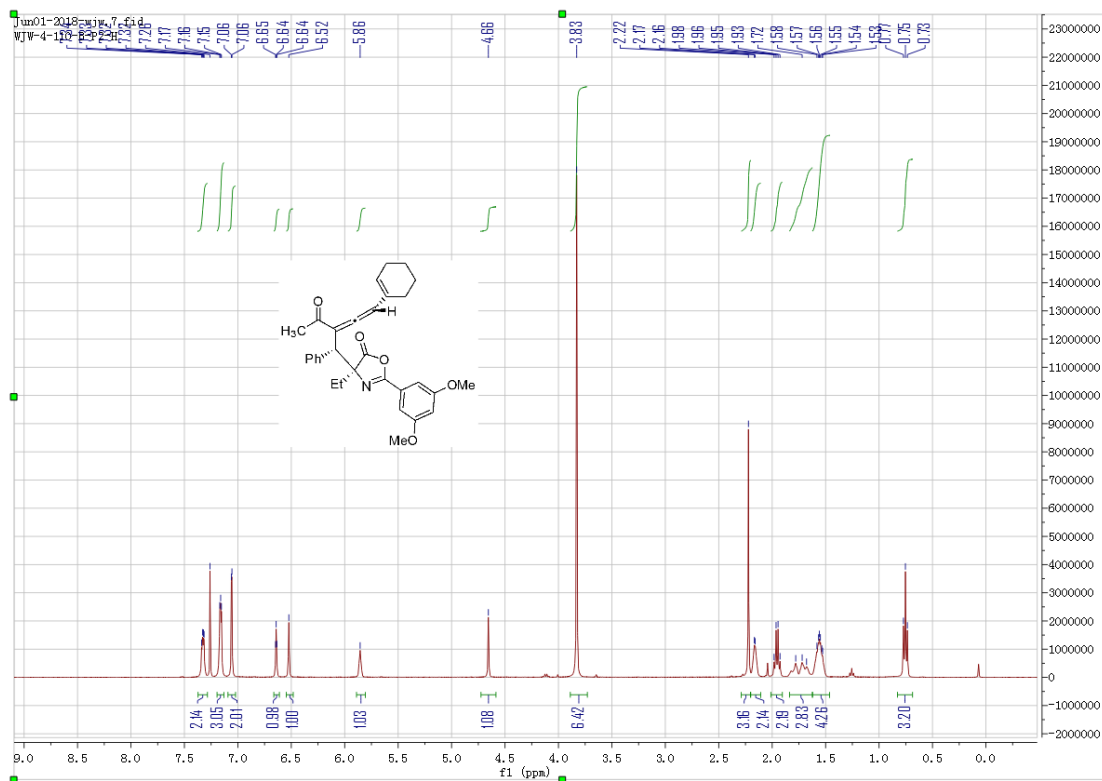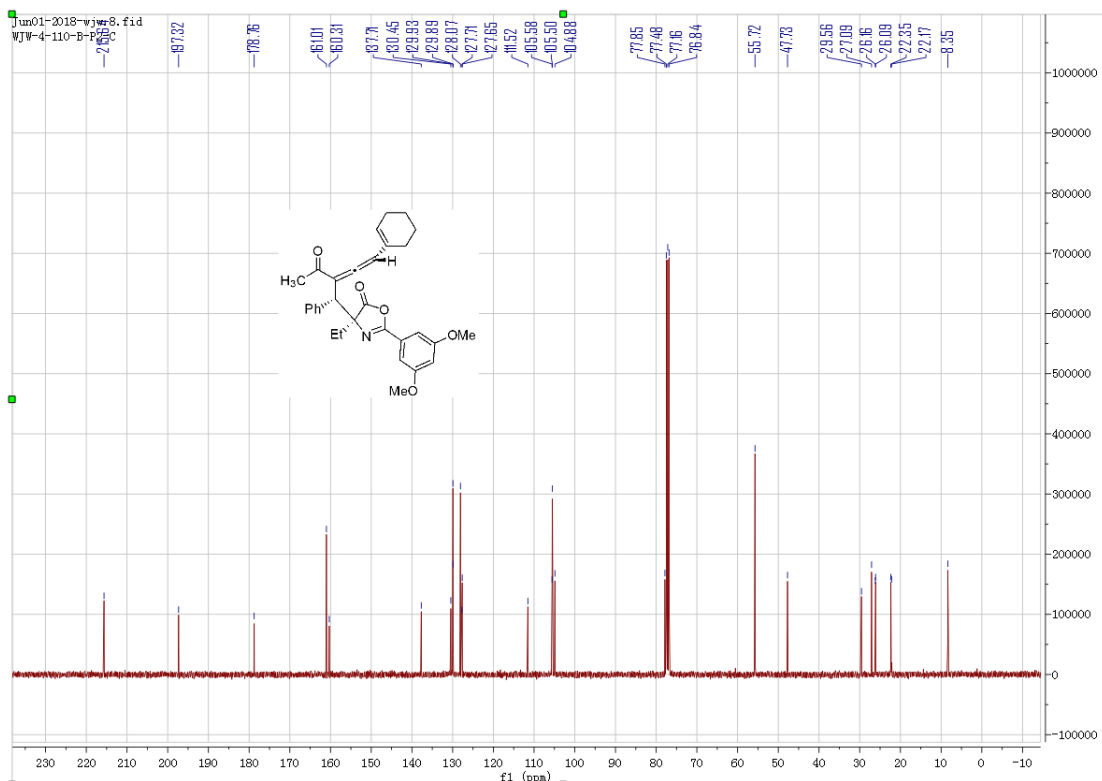

(S)-4-((1*R*,3*R*)-2-acetyl-1-phenylocta-2,3-dien-1-yl)-2-(3,5-dimethoxyphenyl)-4-ethyloxazol-5(4*H*)-one

e (3k)

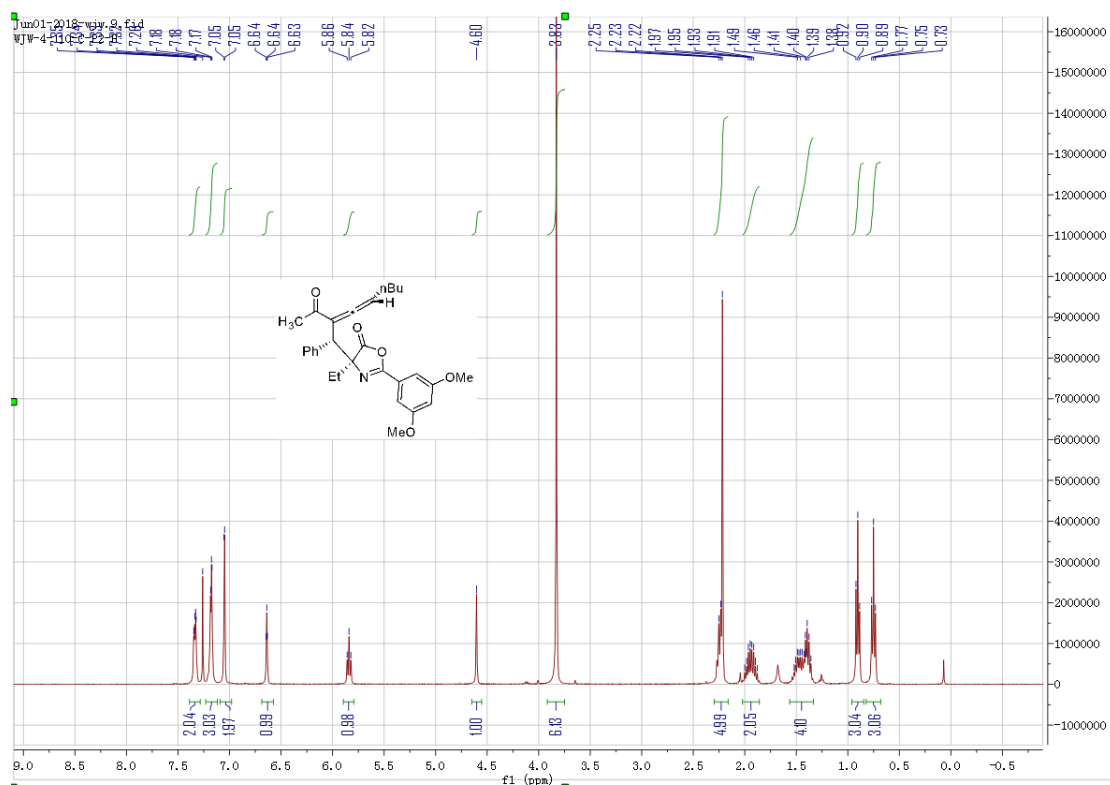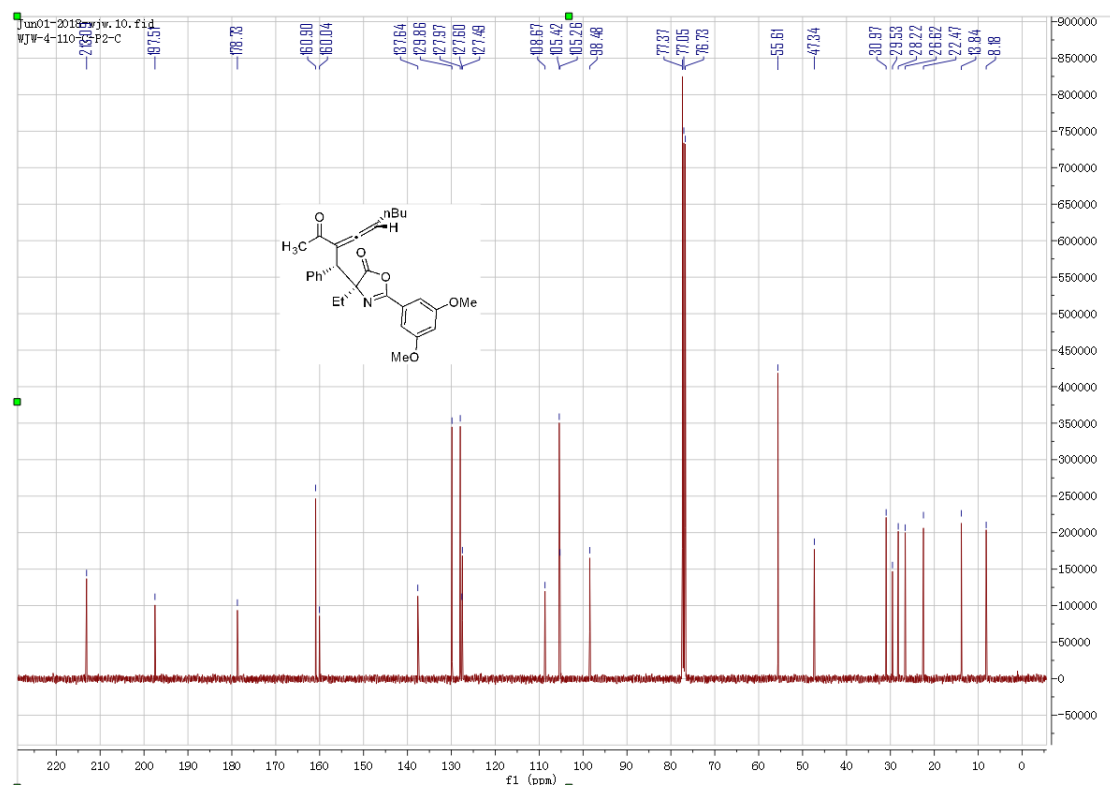

(S)-4-((1*R*,3*R*)-2-acetyl-4-phenyl-1-(p-tolyl)buta-2,3-dien-1-yl)-2-(3,5-dimethoxyphenyl)-4-ethyloxazolidin-5(4*H*)-one (**31**)

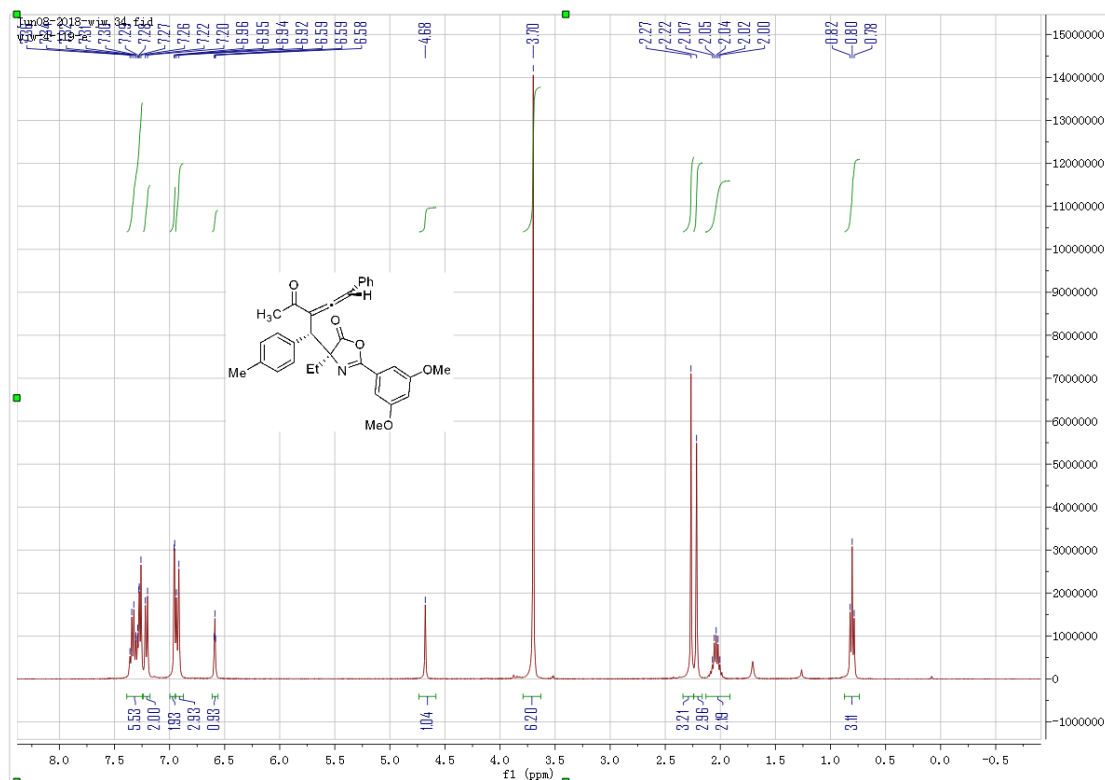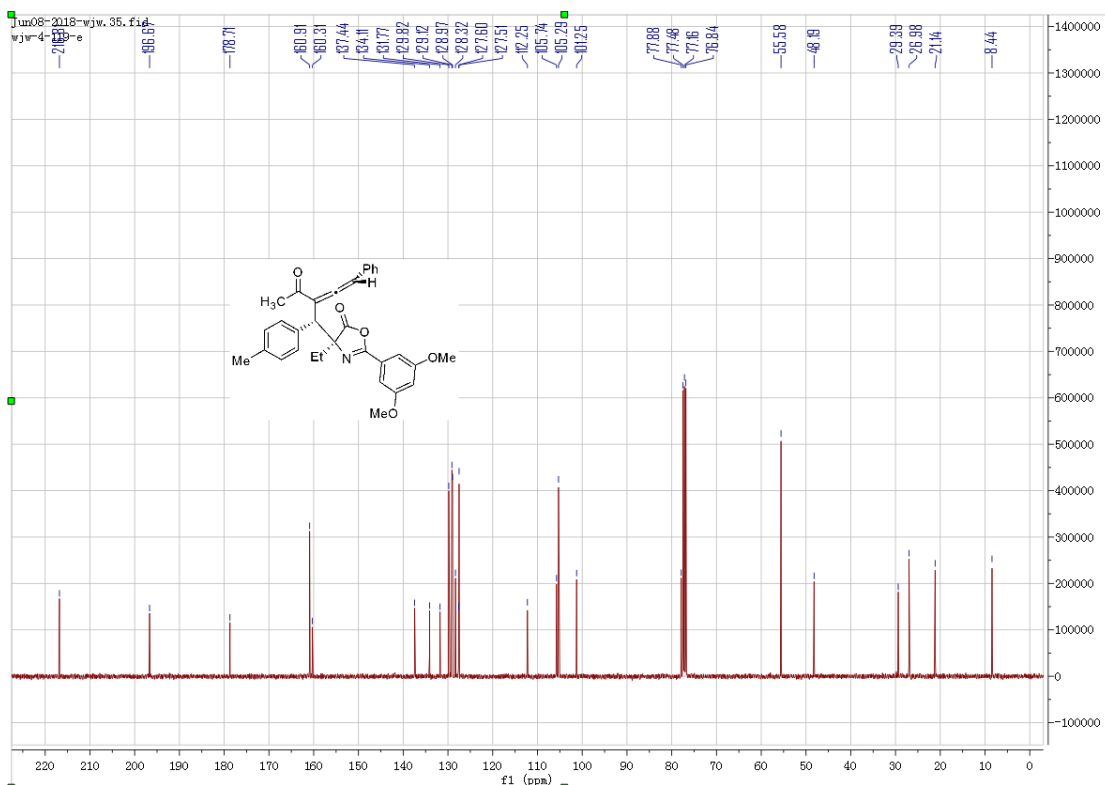

(S)-4-((1*R*,3*R*)-2-acetyl-1-(4-fluorophenyl)-4-phenylbuta-2,3-dien-1-yl)-2-(3,5-dimethoxyphenyl)-4-ethyloxazol-5(4*H*)-one (**3m**)

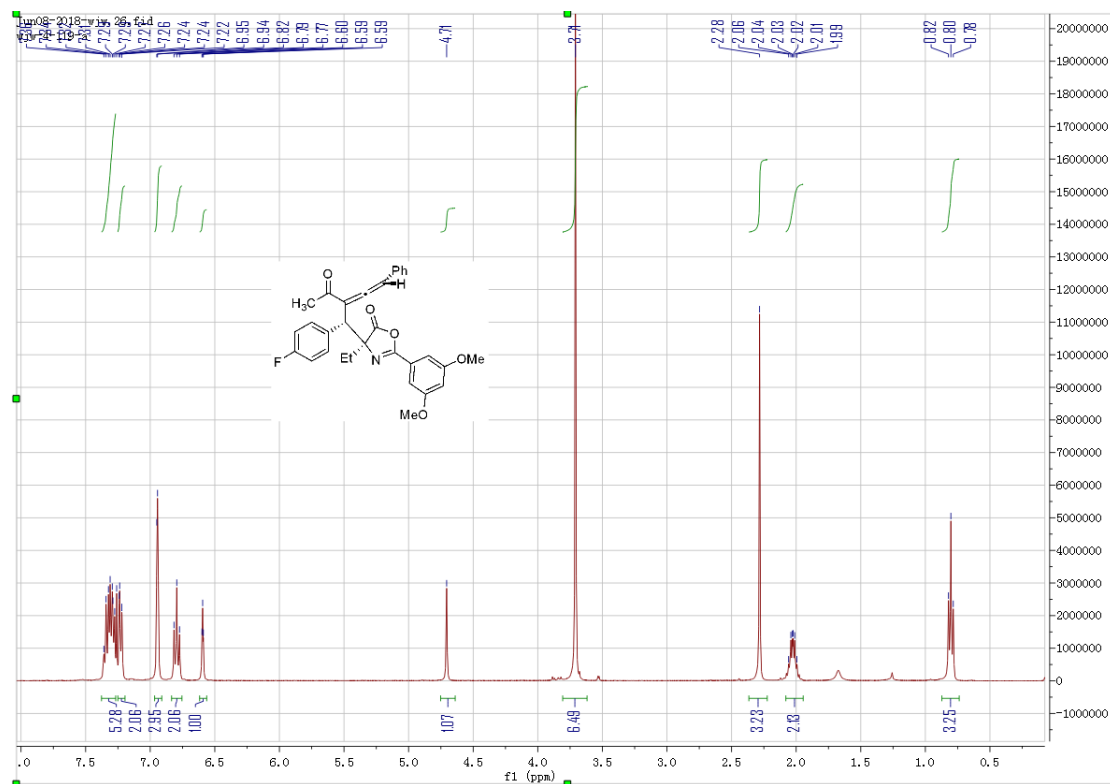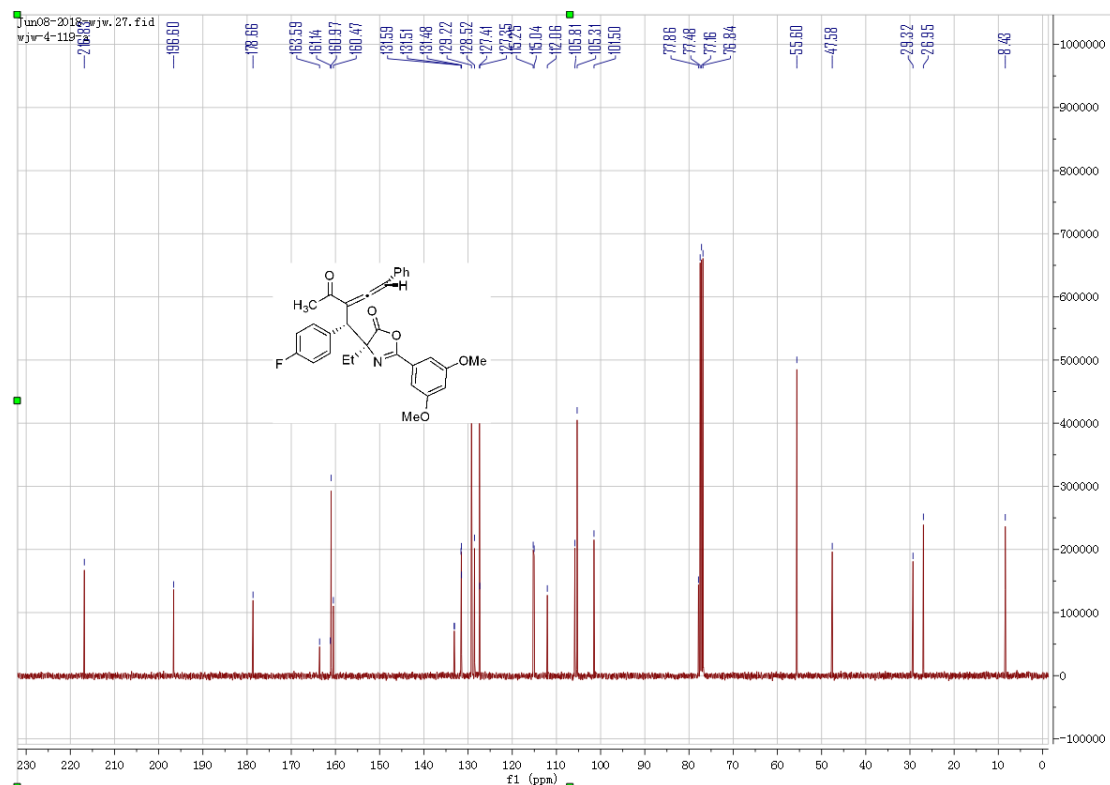

Jun11-2018-wjw.6.fid  
WJW-4-119-A-P

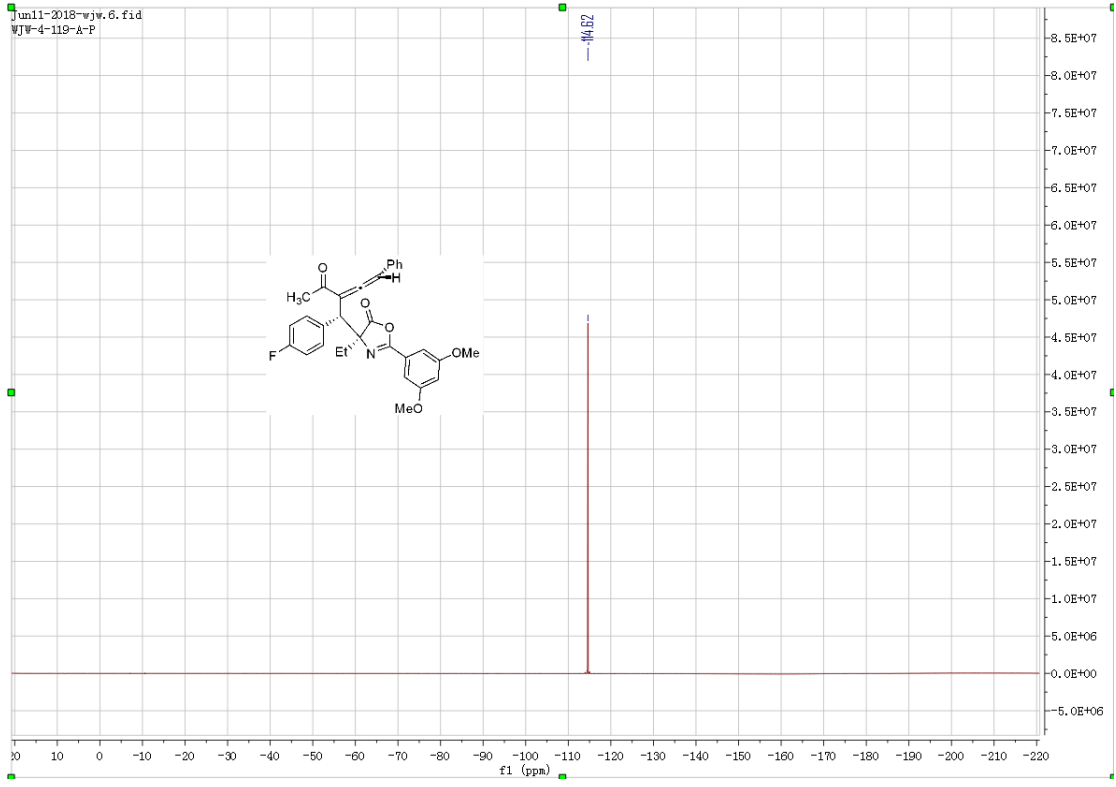



(S)-4-((1*R*,3*R*)-2-acetyl-1-(4-chlorophenyl)-4-phenylbuta-2,3-dien-1-yl)-2-(3,5-dimethoxyphenyl)-4-ethylloxazol-5(4*H*)-one (**3n**)

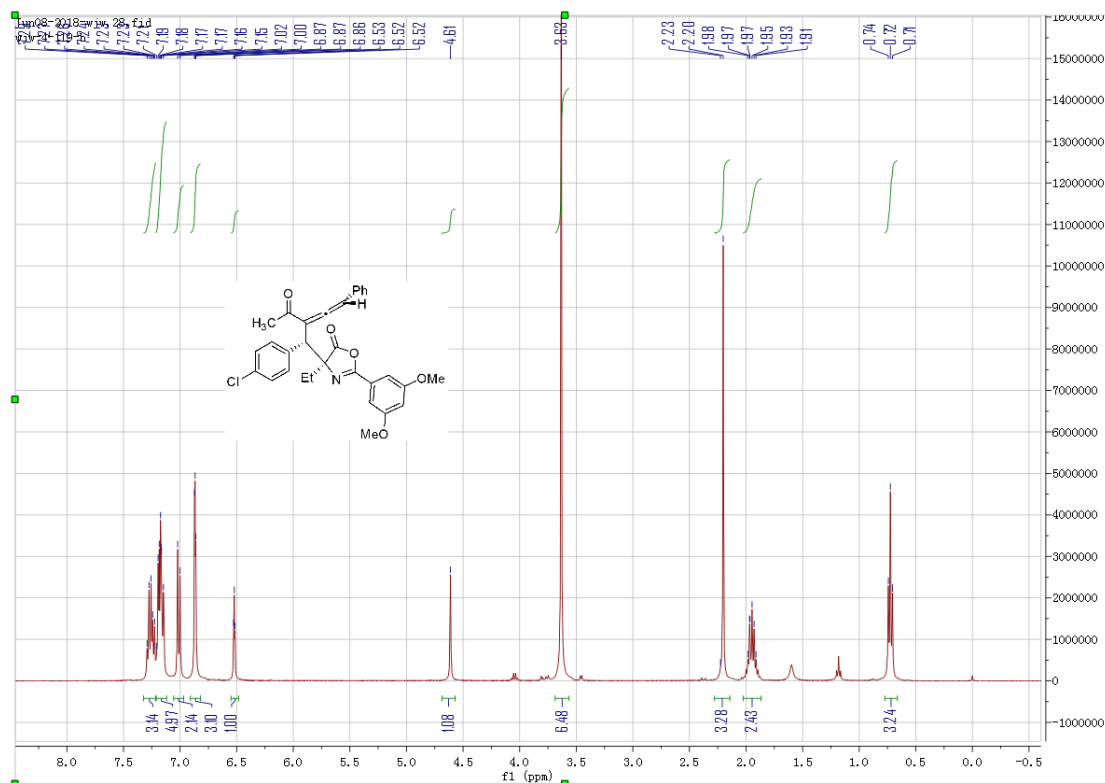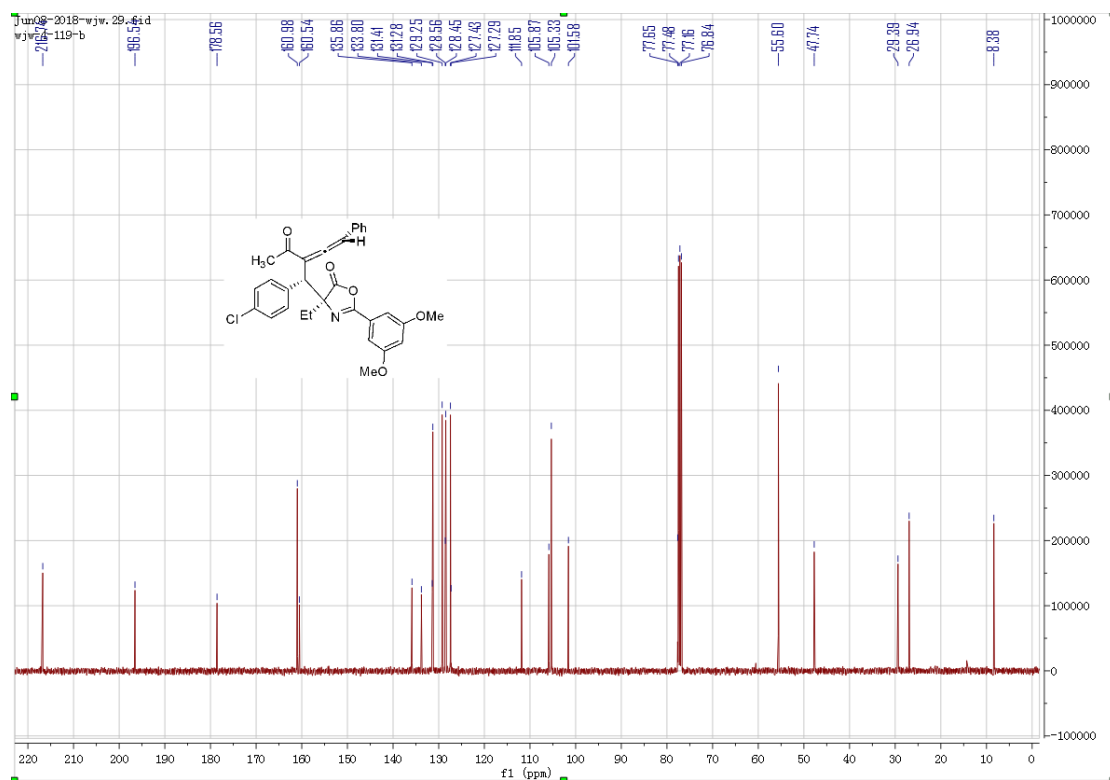

(S)-4-((1*R*,3*R*)-2-acetyl-1-(4-methoxyphenyl)-4-phenylbuta-2,3-dien-1-yl)-2-(3,5-dimethoxyphenyl)-4-ethoxazol-5(4*H*)-one (**30**)

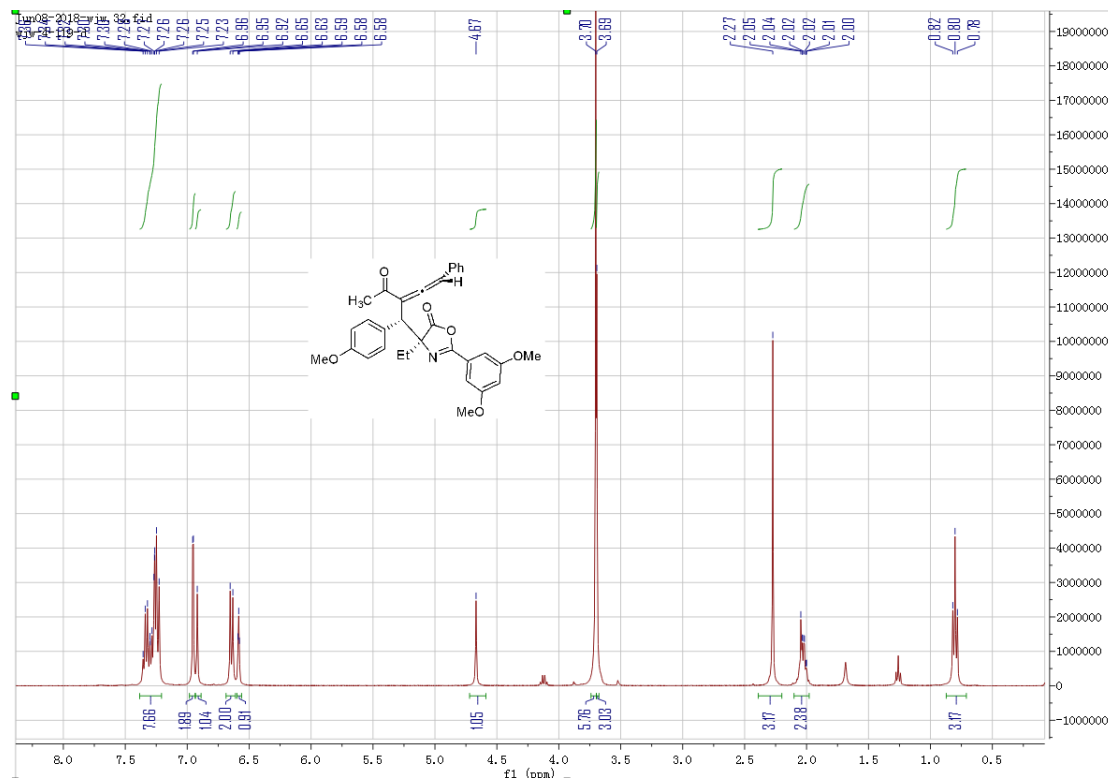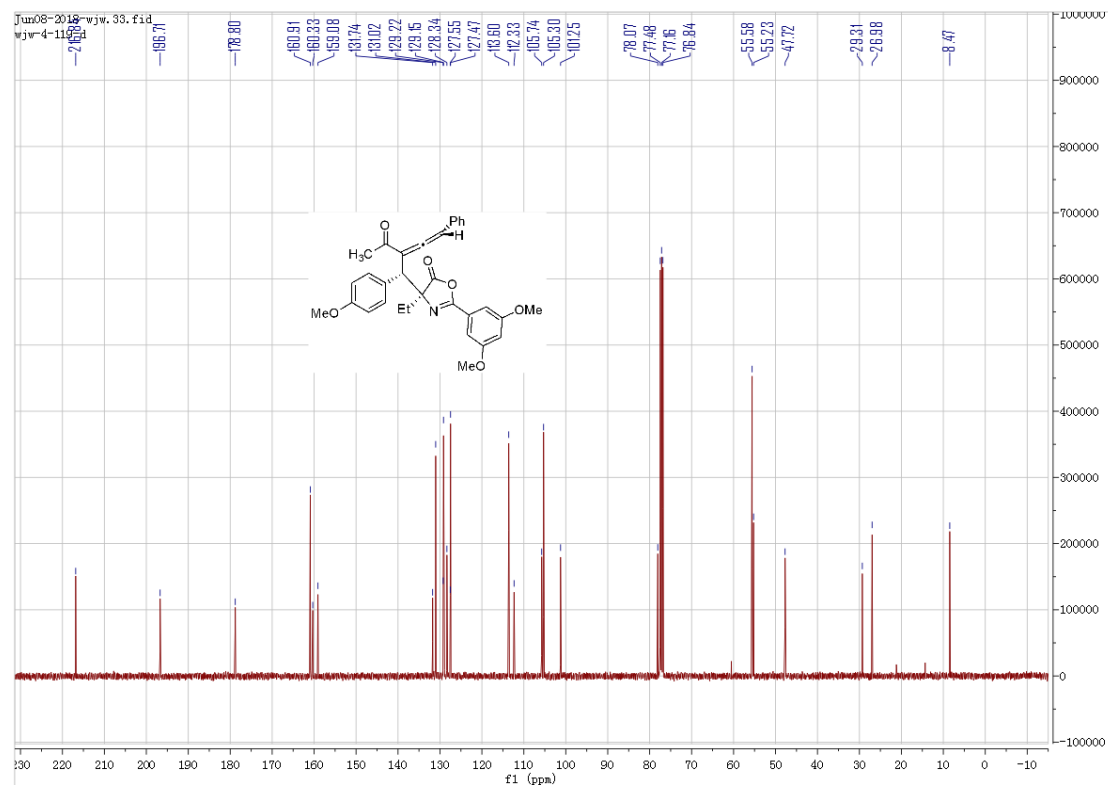

(S)-4-((1*R*,3*R*)-2-acetyl-1-(naphthalen-2-yl)-4-phenylbuta-2,3-dien-1-yl)-2-(3,5-dimethoxyphenyl)-4-ethyl-5-oxazol-5(4*H*)-one (**3p**)

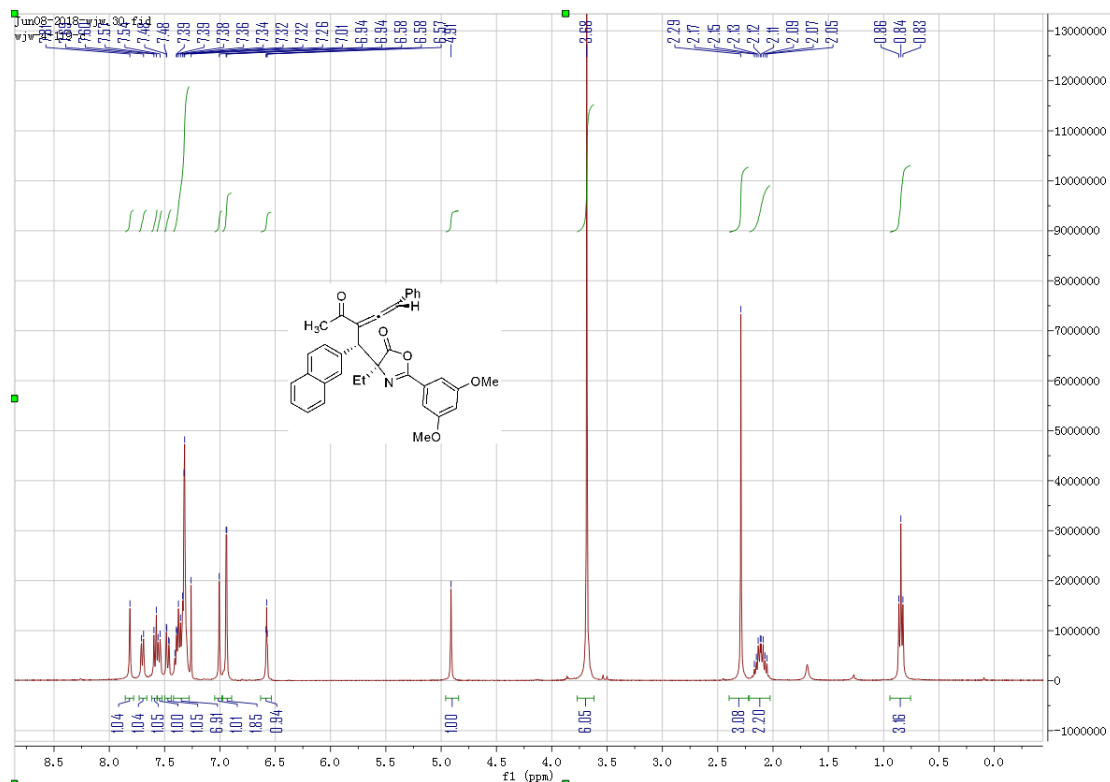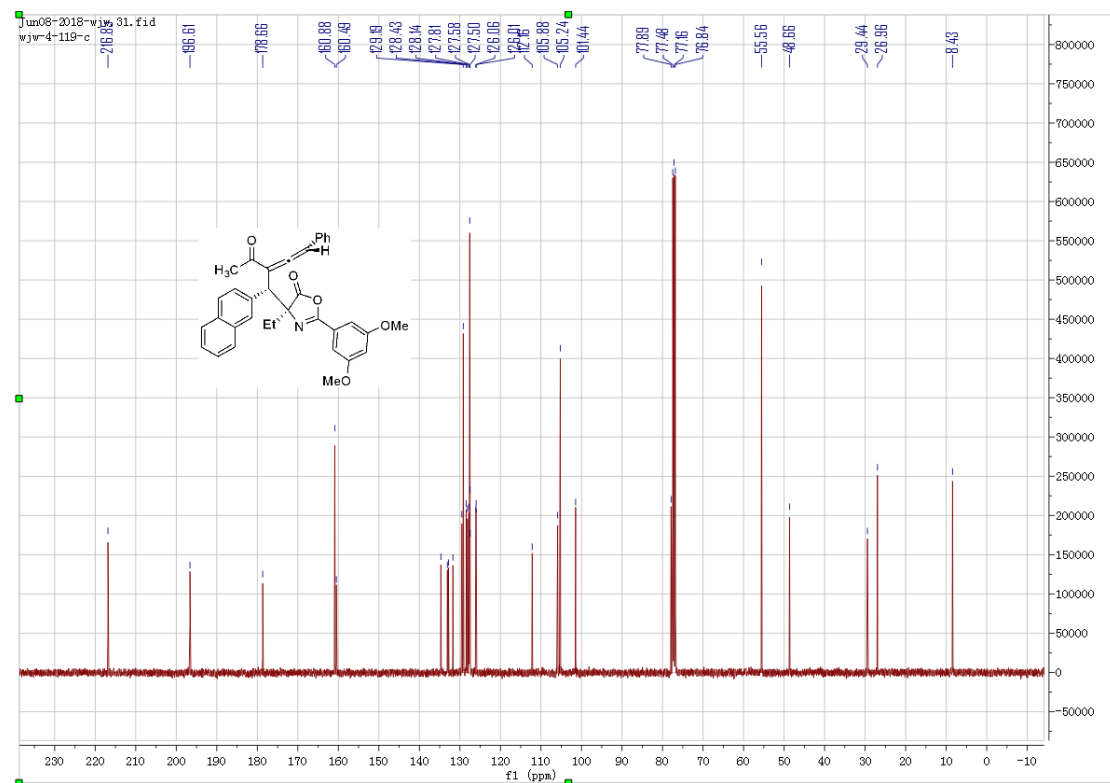

(S)-4-((1R,3R)-2-acetyl-1-cyclohexyl-4-phenylbuta-2,3-dien-1-yl)-2-(3,5-dimethoxyphenyl)-4-ethyloxazol-5(4H)-one (**3q**)

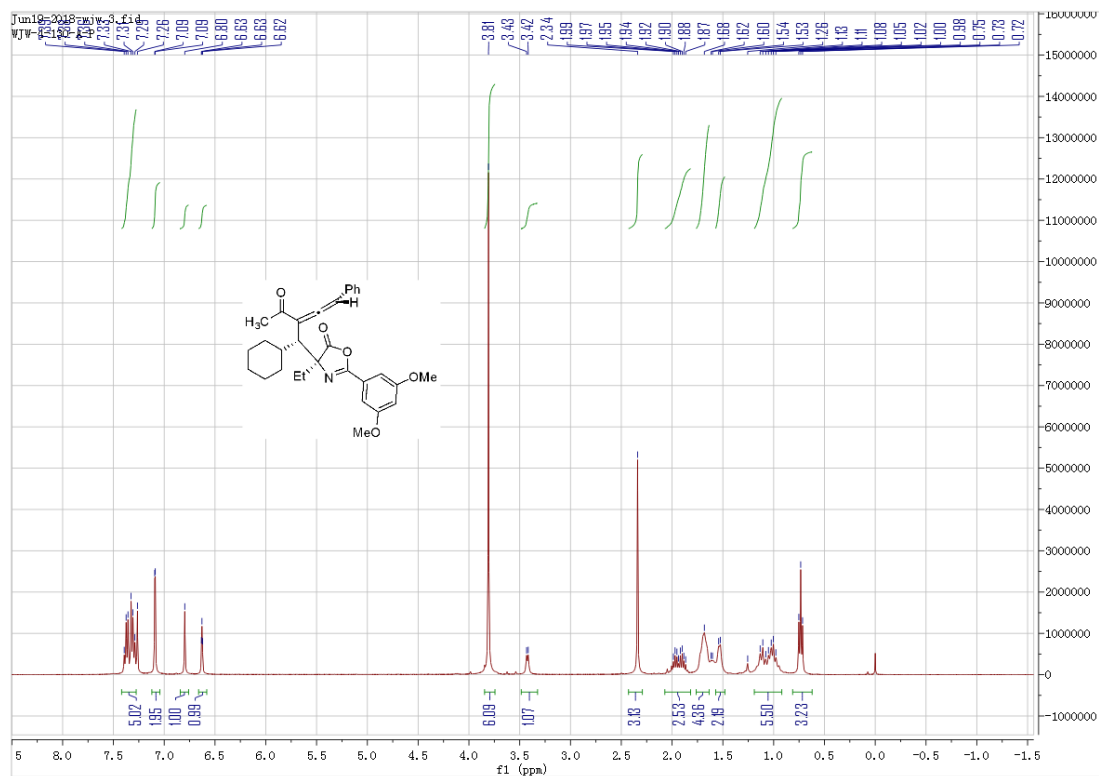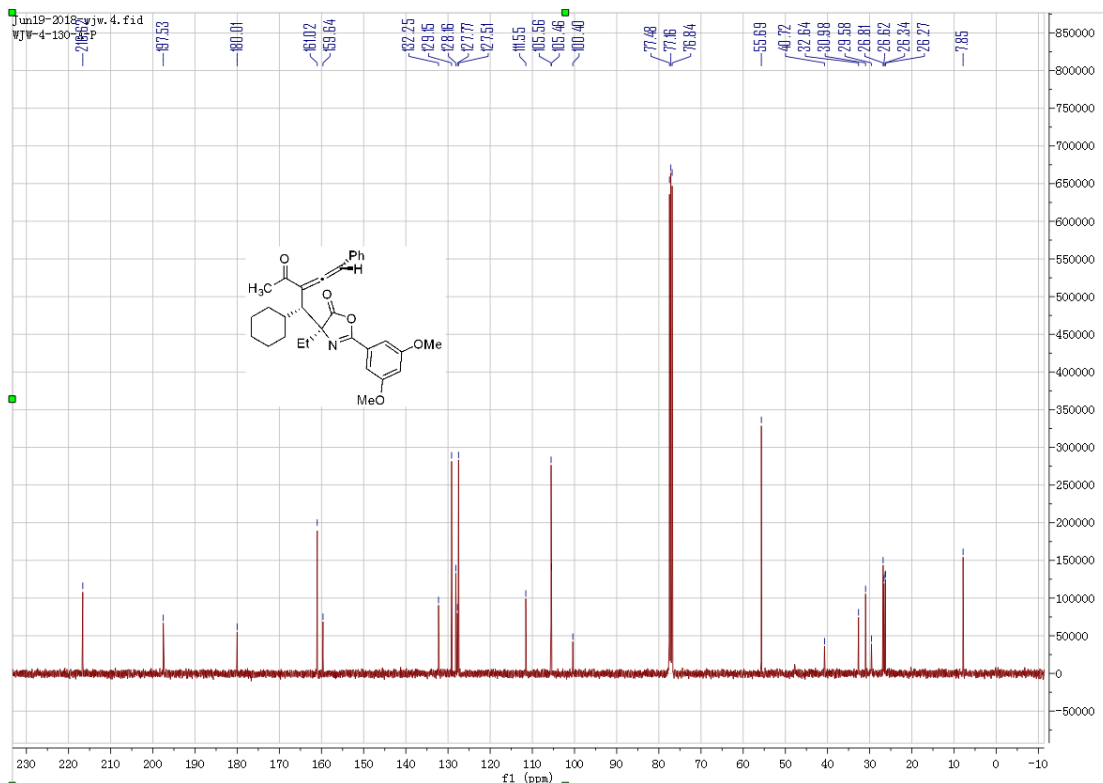

(S)-2-(3,5-dimethoxyphenyl)-4-ethyl-4-((R)-3-oxo-1-phenyl-2-((R)-2-phenylvinylidene)pentyl)oxazol-5(4H)-one (**3r**)

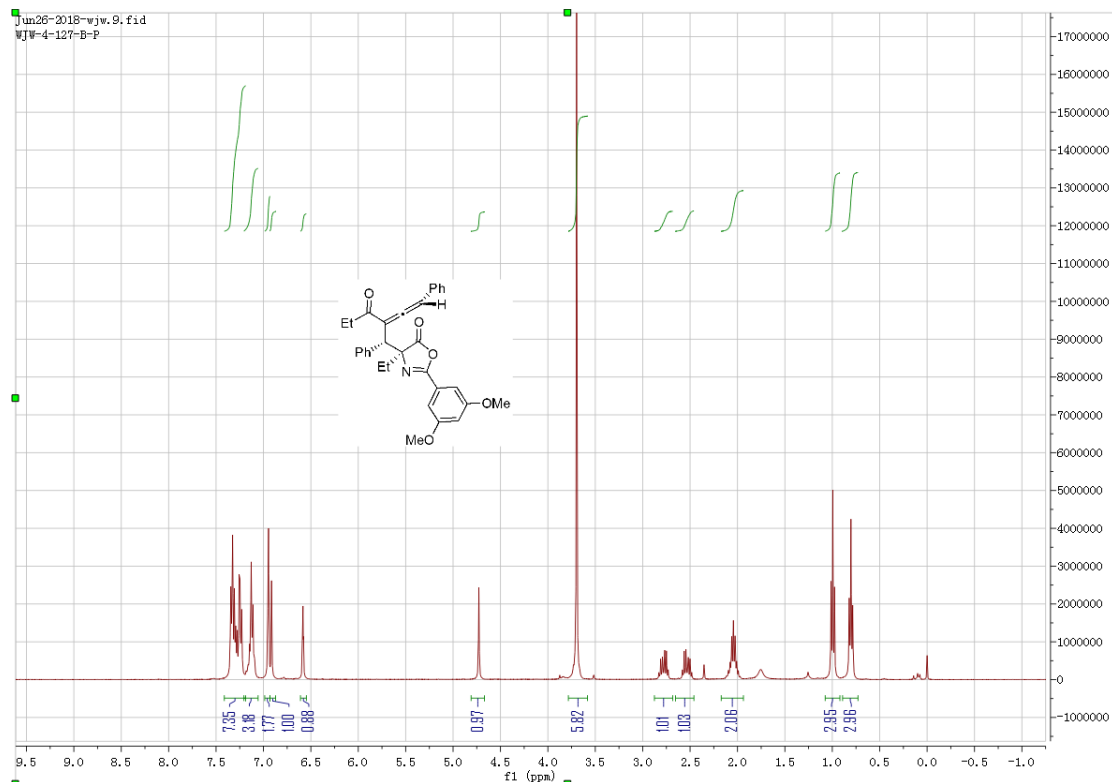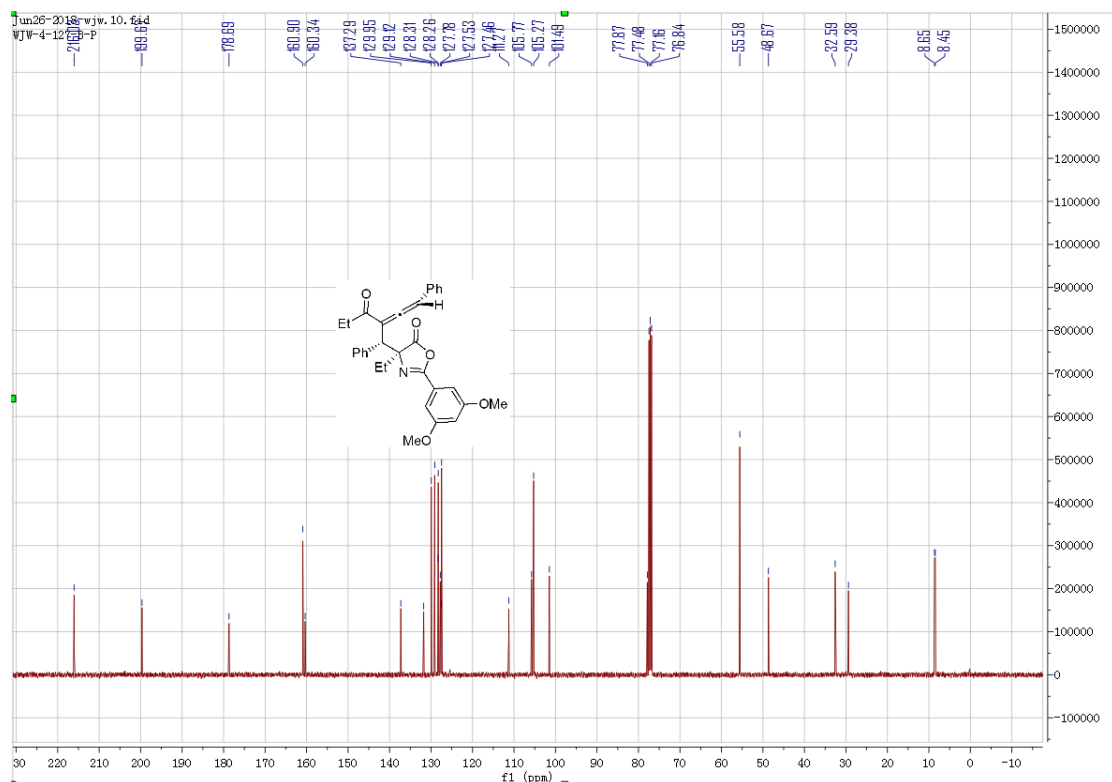

(S)-2-(3,5-dimethoxyphenyl)-4-ethyl-4-((R)-3-oxo-1-phenyl-2-((R)-2-phenylvinylidene)hexyl)oxazol-5  
(4H)-one (3s)

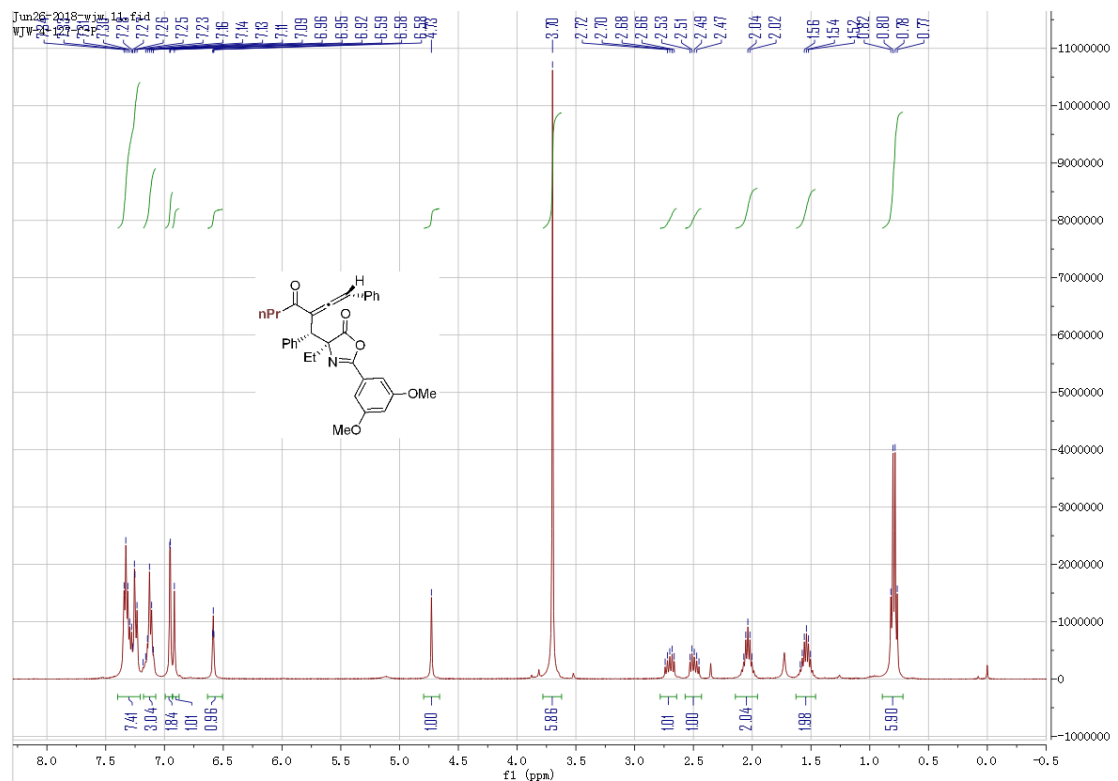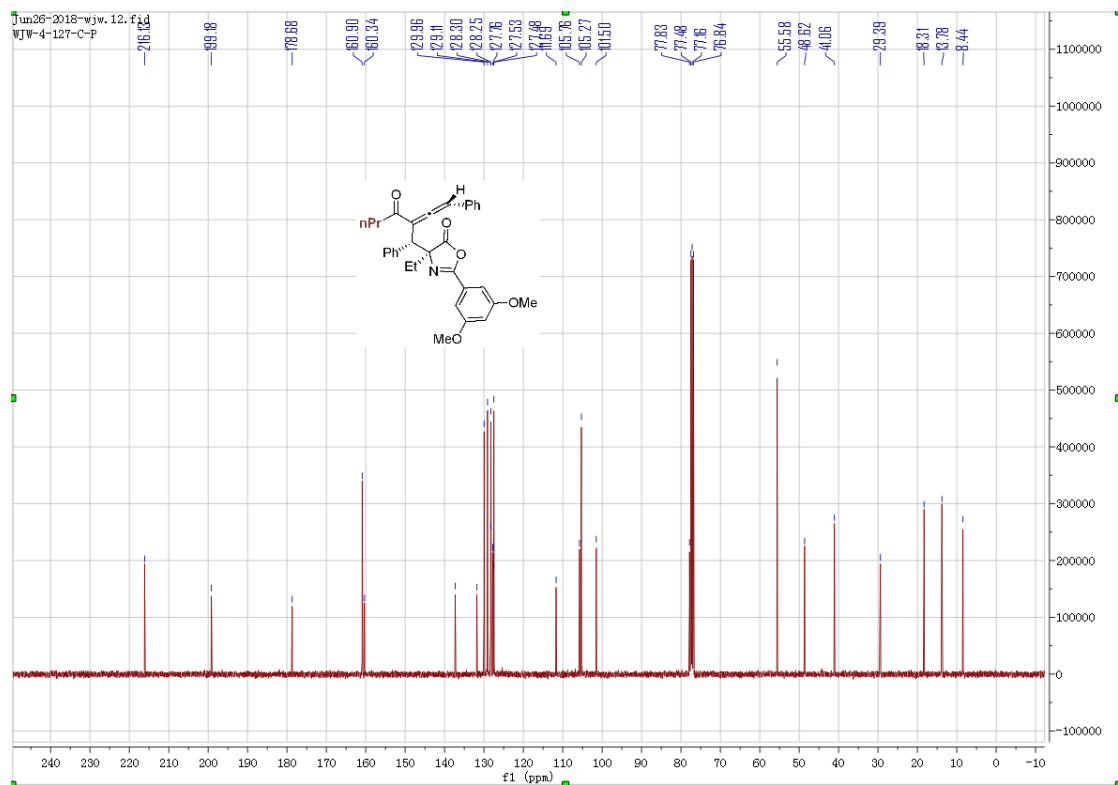

(S)-2-(3,5-dimethoxyphenyl)-4-ethyl-4-((R)-3-oxo-1-phenyl-2-((R)-2-phenylvinylidene)heptyl)oxazol-5(4H)-one (**3t**)

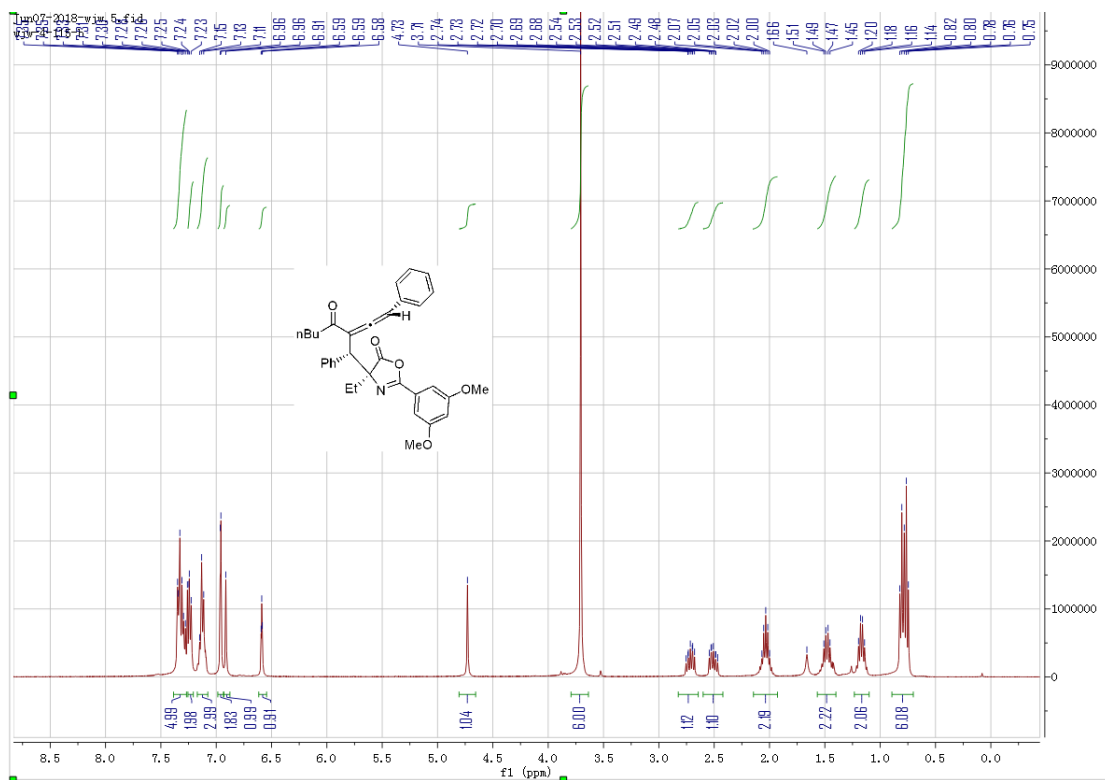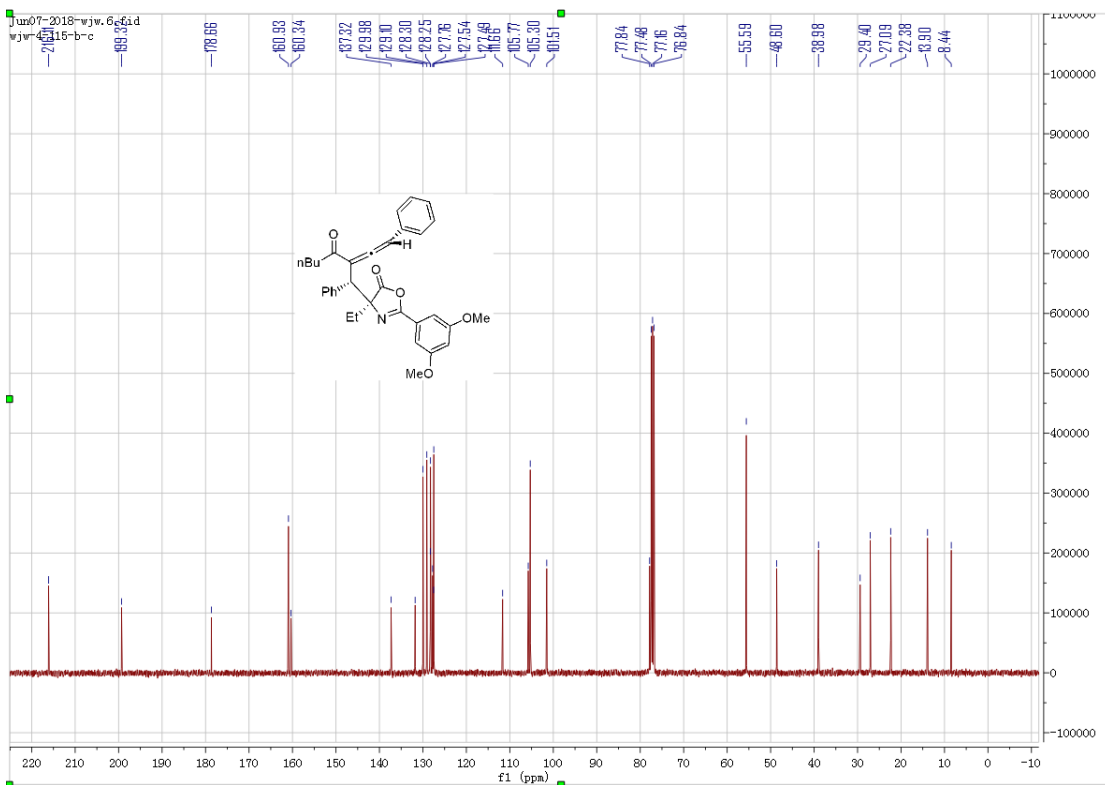

(*S*)-2-(3,5-dimethoxyphenyl)-4-ethyl-4-((*R*)-5-methyl-3-oxo-1-phenyl-2-((*R*)-2-phenylvinylidene)hexyl)oxazol-5(4H)-one (**3u**)

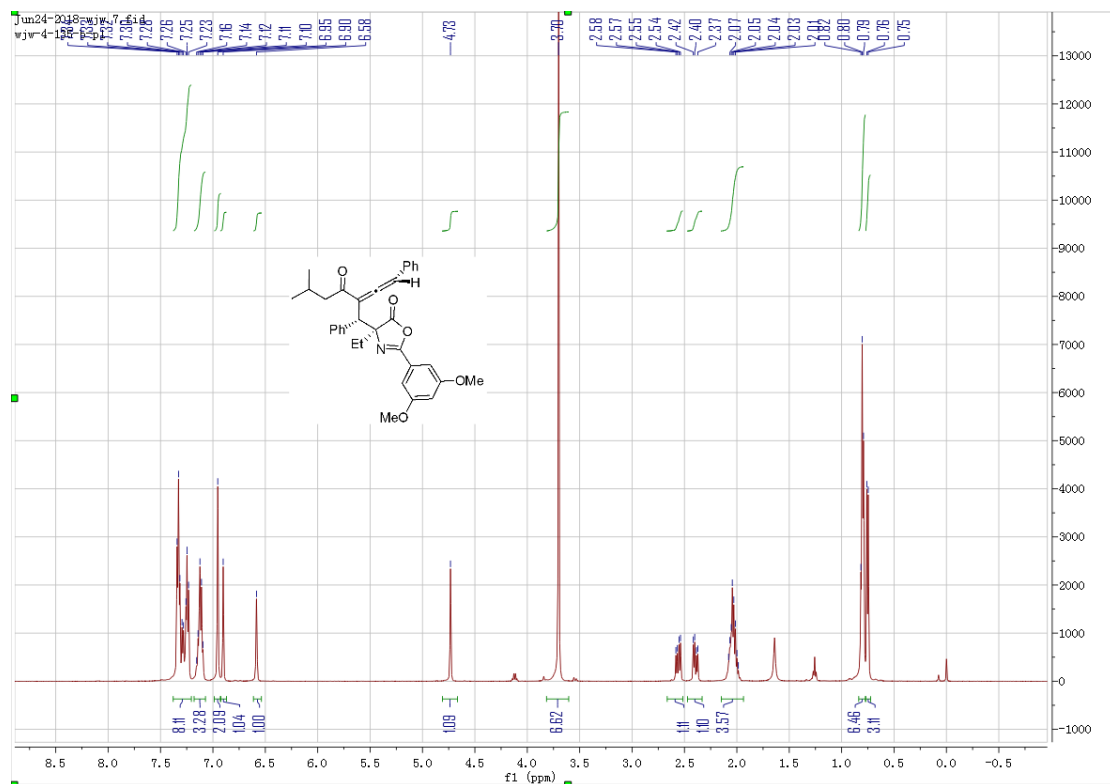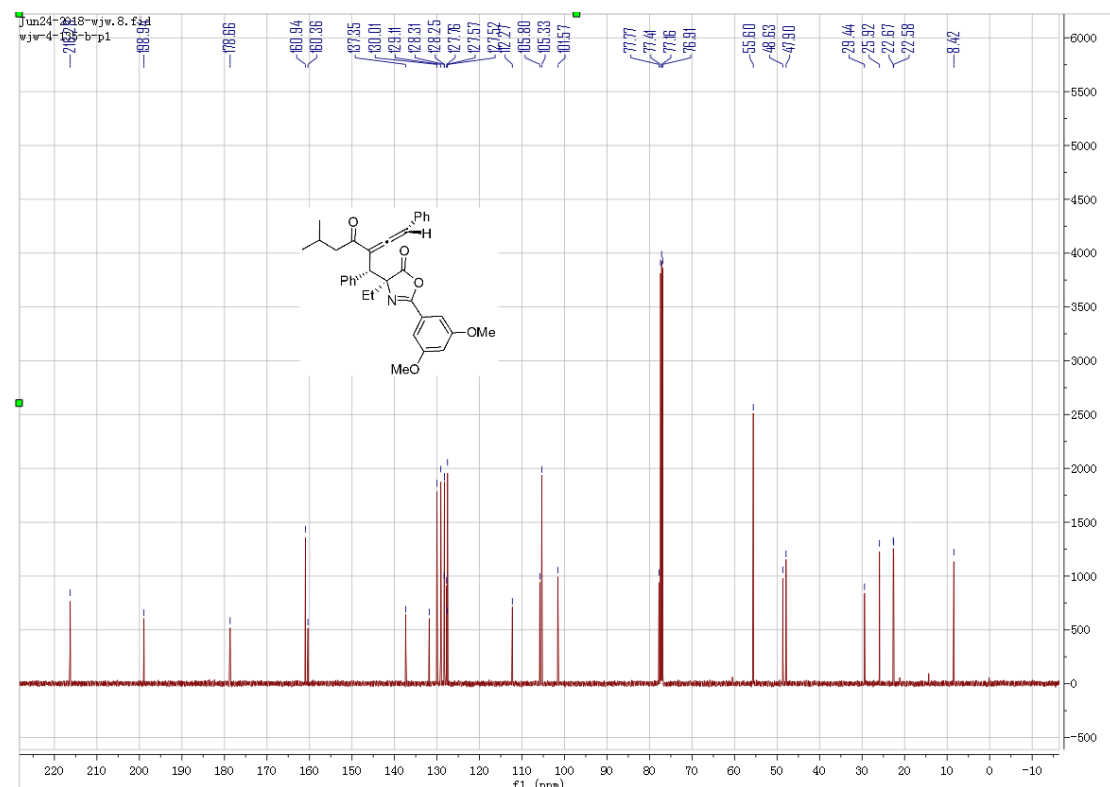



(S)-4-((1*R*,3*R*)-2-acetyl-1,4-diphenylbuta-2,3-dien-1-yl)-4-butyl-2-(3,5-dimethoxyphenyl)oxazol-5(4*H*)-one (**3v**)

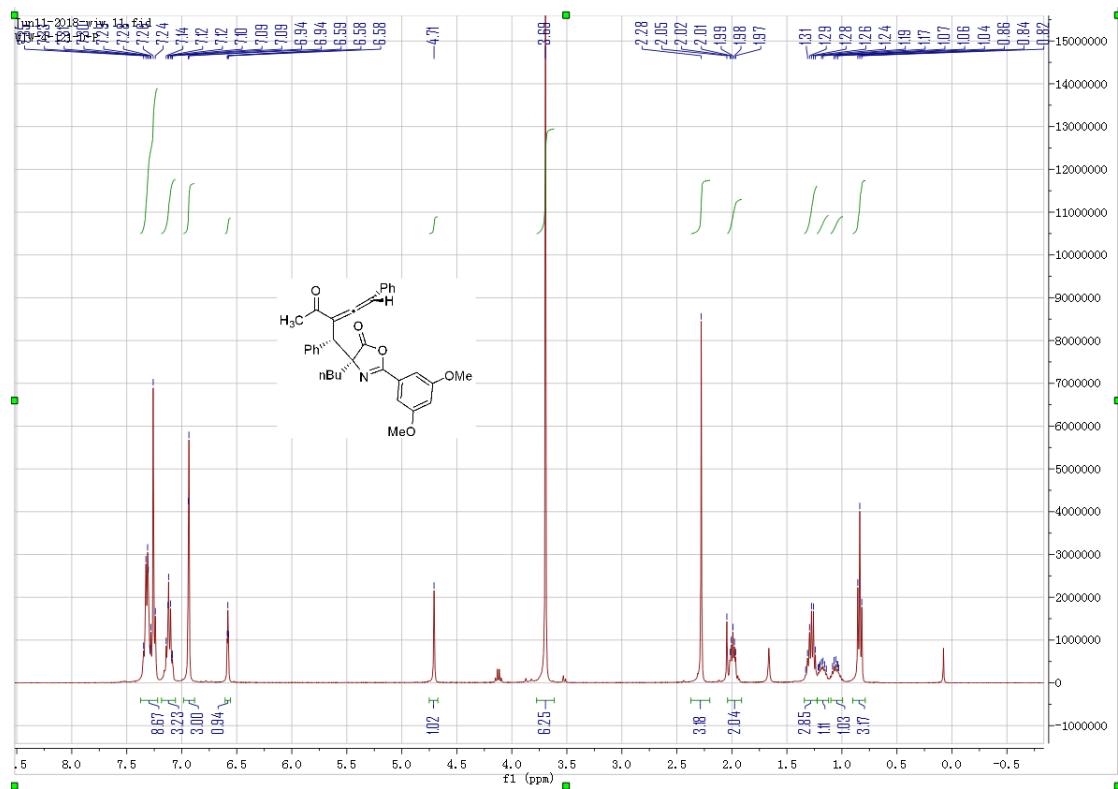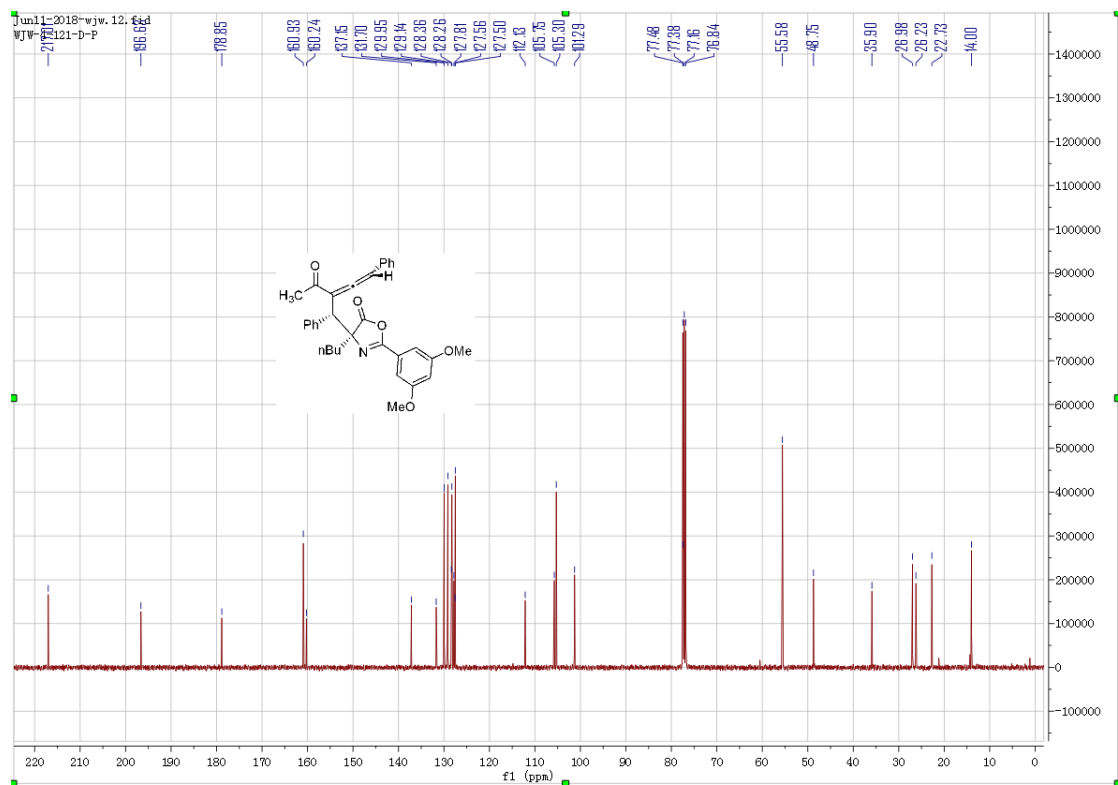

(S)-4-((1R,3R)-2-acetyl-1,4-diphenylbuta-2,3-dien-1-yl)-4-benzyl-2-(3,5-dimethoxyphenyl)oxazol-5(4H)-one (3w)

H)-one (3w)

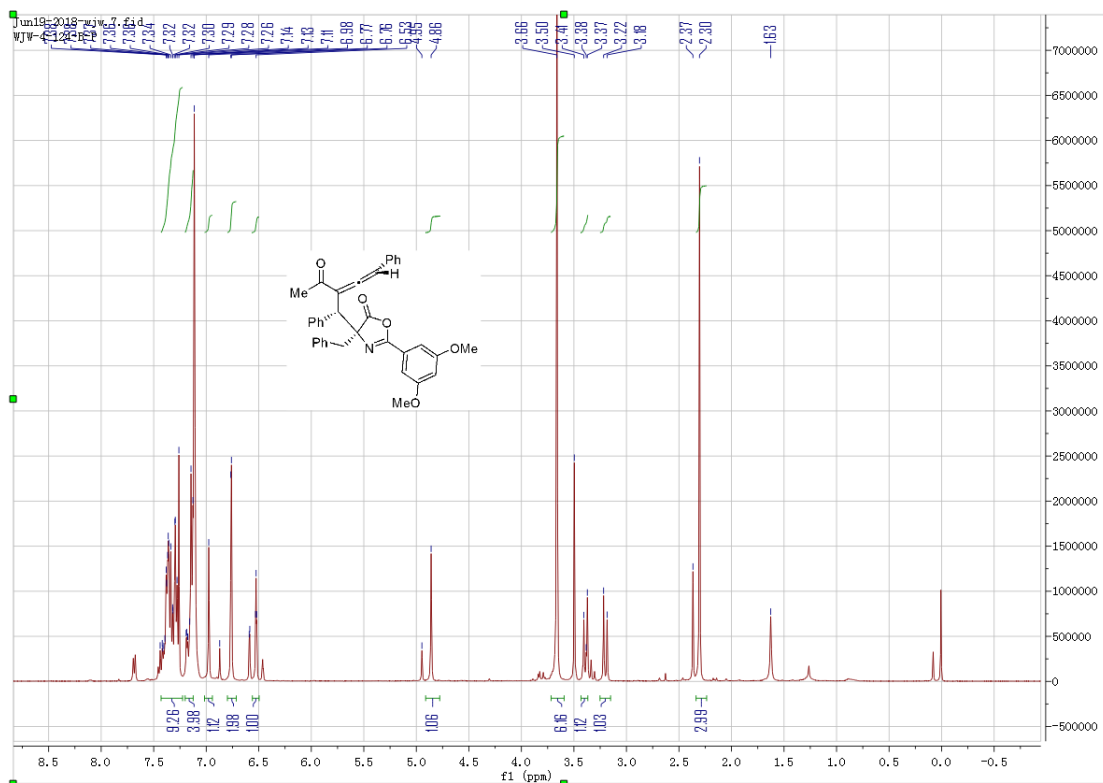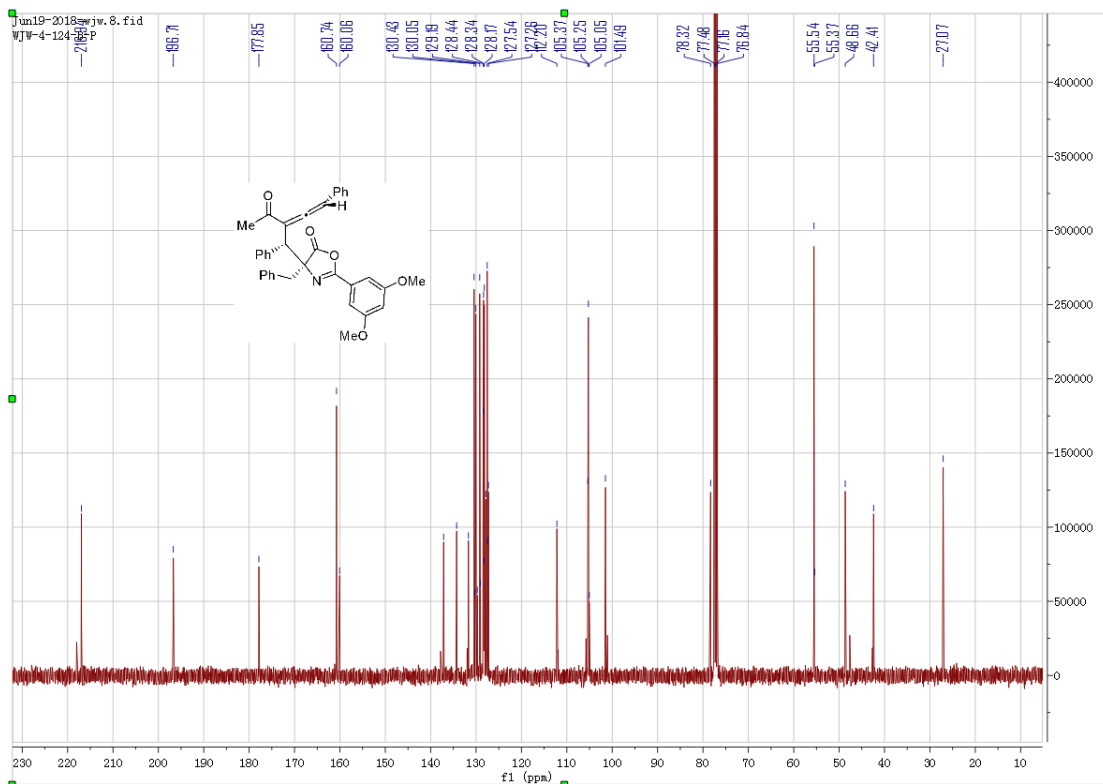

(S)-4-((1*R*,3*R*)-2-acetyl-1,4-diphenylbuta-2,3-dien-1-yl)-2-(3,5-dimethoxyphenyl)-4-(2-(methylthio)ethyl)oxazol-5(4*H*)-one (**3x**)

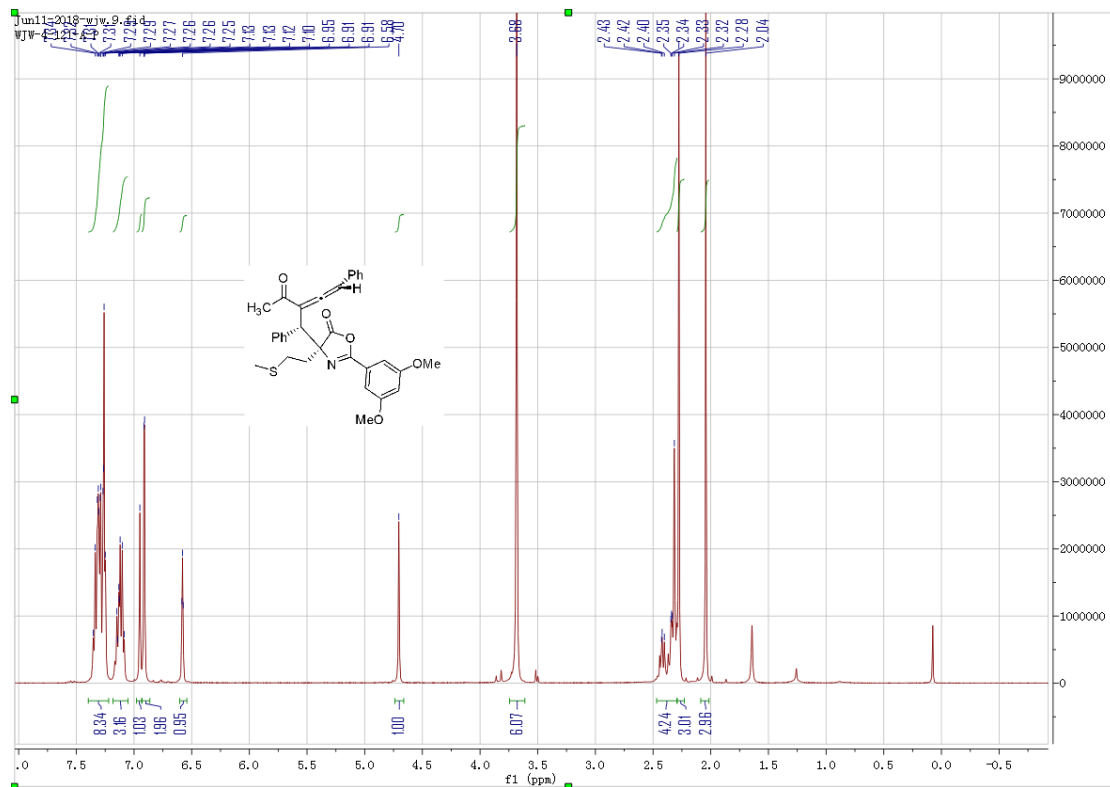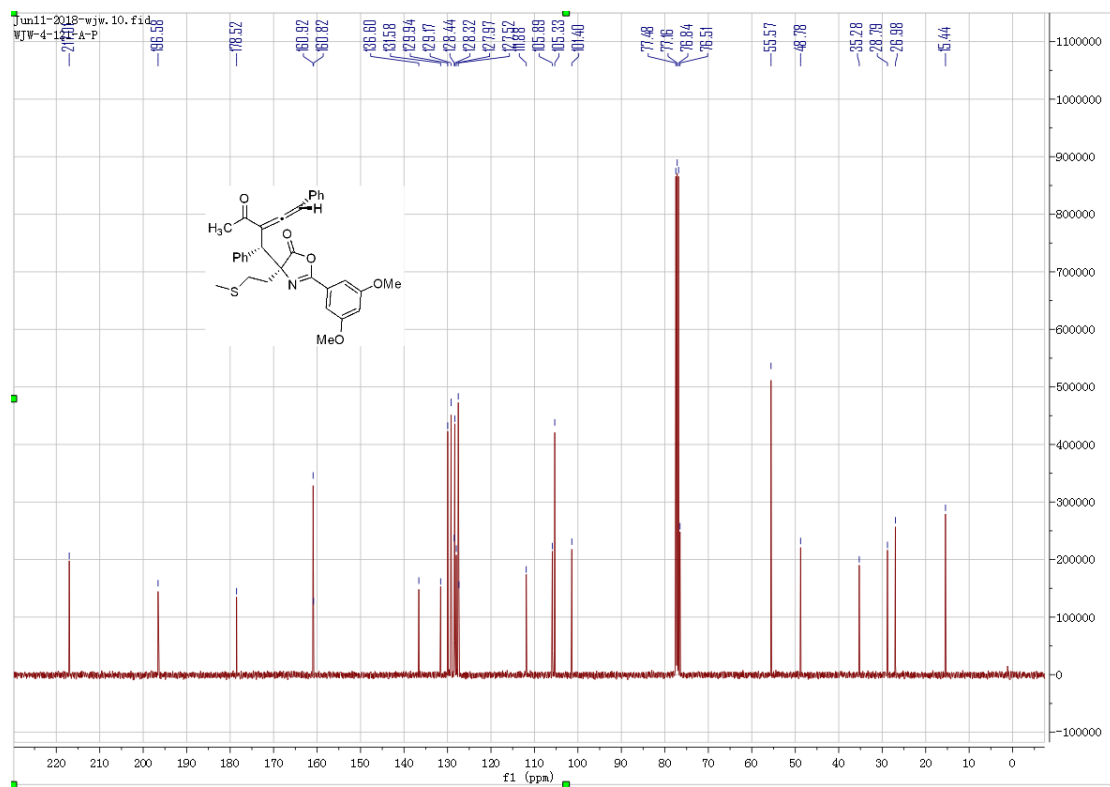

tert-butyl(4-((*S*)-4-((*1R,3R*)-2-acetyl-1,4-diphenylbuta-2,3-dien-1-yl)-2-(3,5-dimethoxyphenyl)-5-oxo-4,5-dihydrooxazol-4-yl)butyl)carbamate (**3y**)

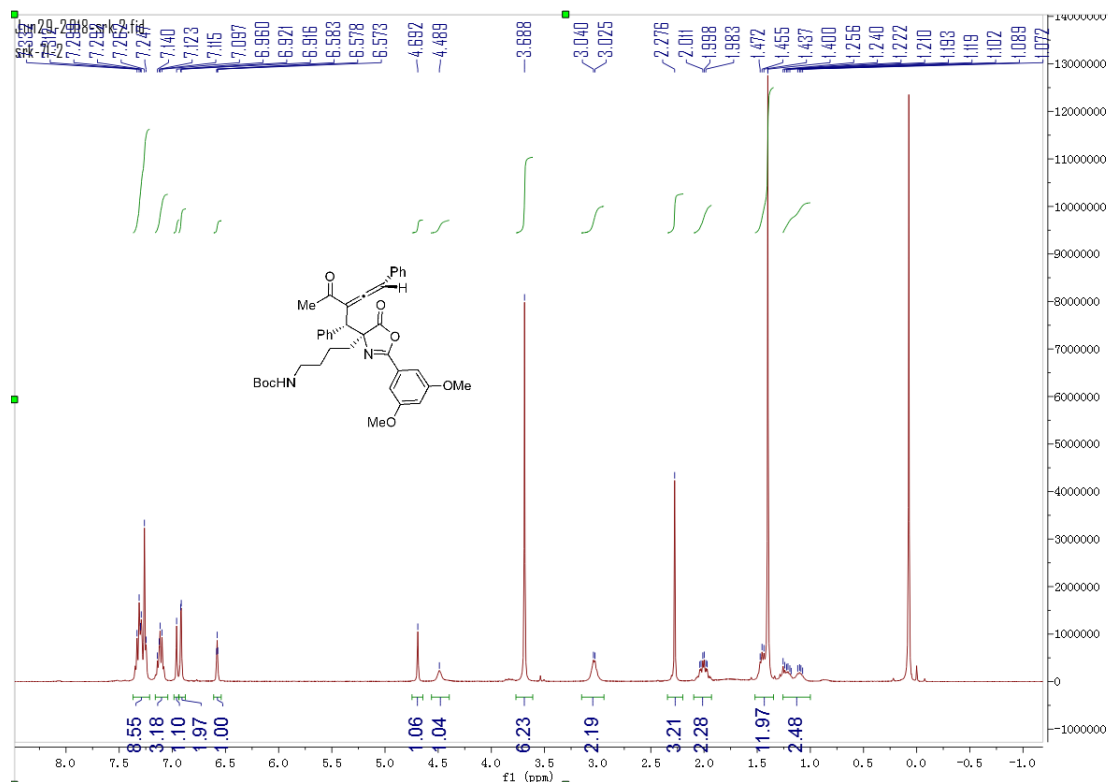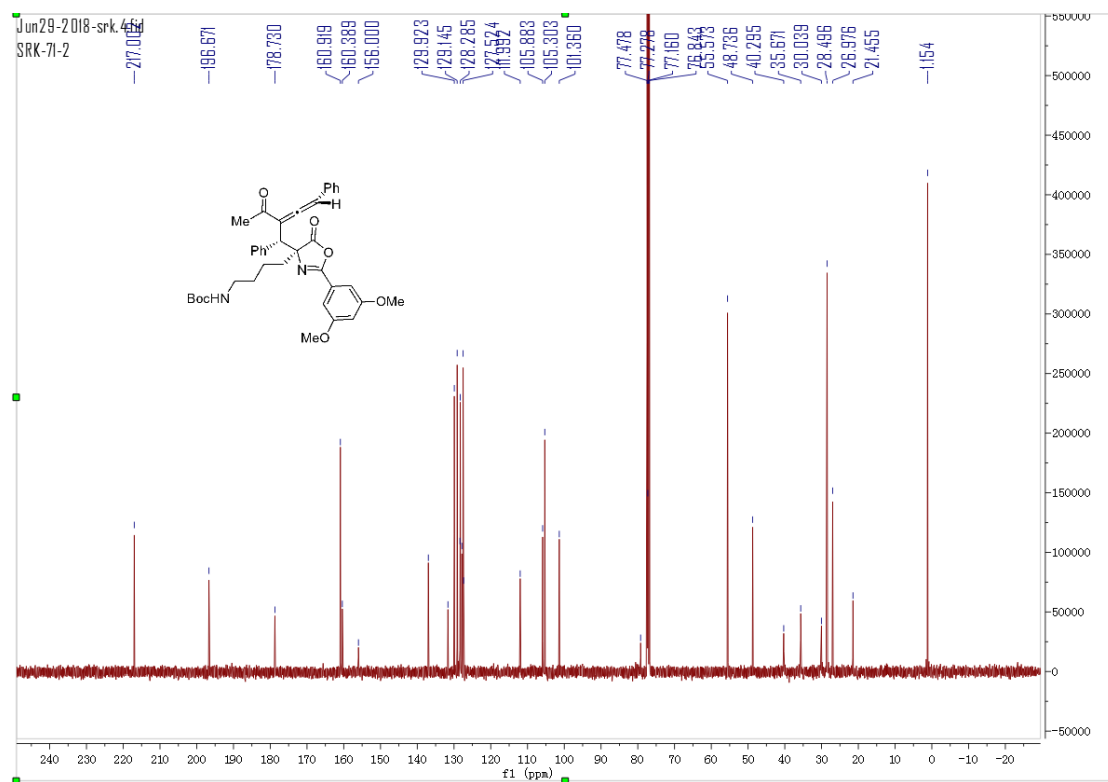

-4-((*1R,3S*)-2-acetyl-1,4-diphenylbuta-2,3-dien-1-yl)-2-(3,5-dimethoxyphenyl)-4-ethylloxazol-5(4H)-on  
**e (4a)**

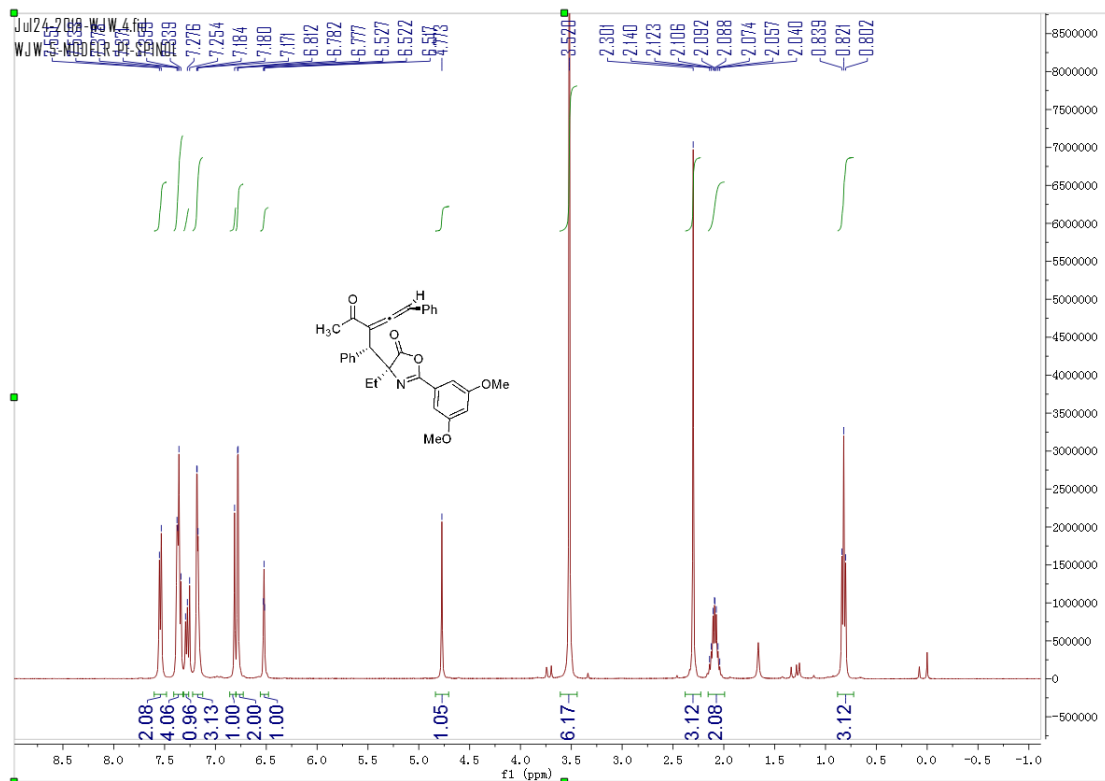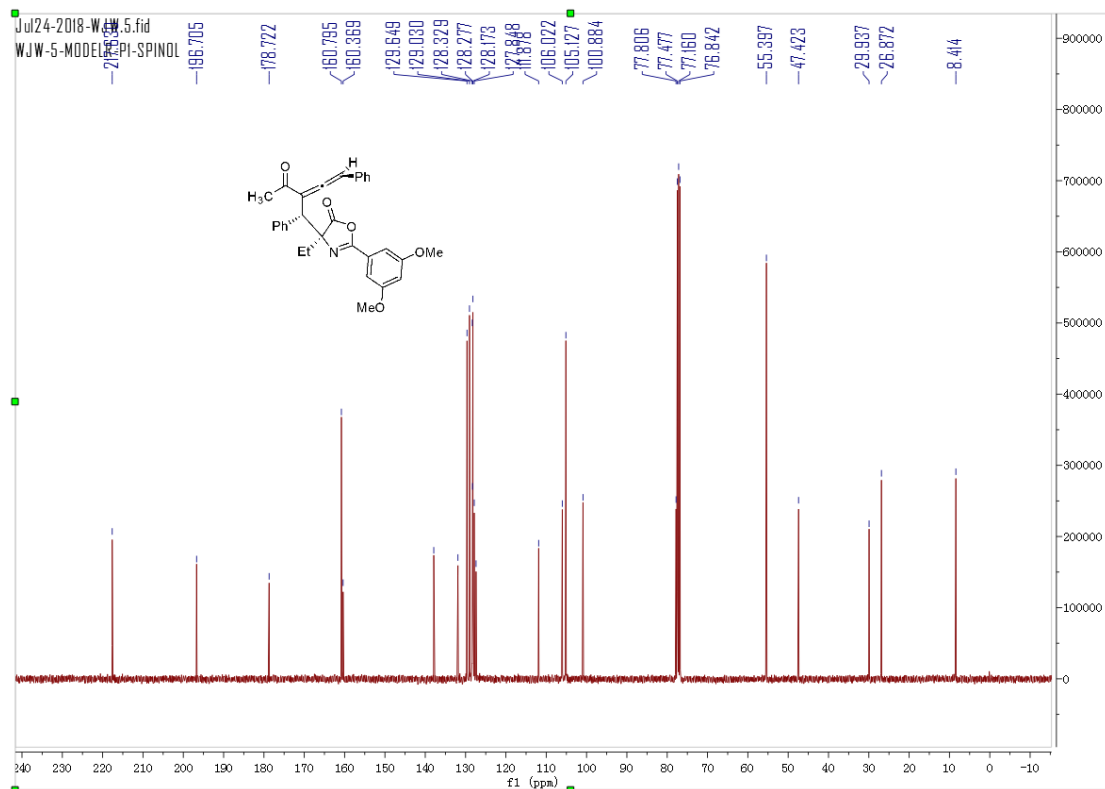

(S)-4-((1*R*,3*S*)-2-acetyl-1-phenyl-4-(p-tolyl)buta-2,3-dien-1-yl)-2-(3,5-dimethoxyphenyl)-4-ethyloxazol-5(4H)-one (**4b**)

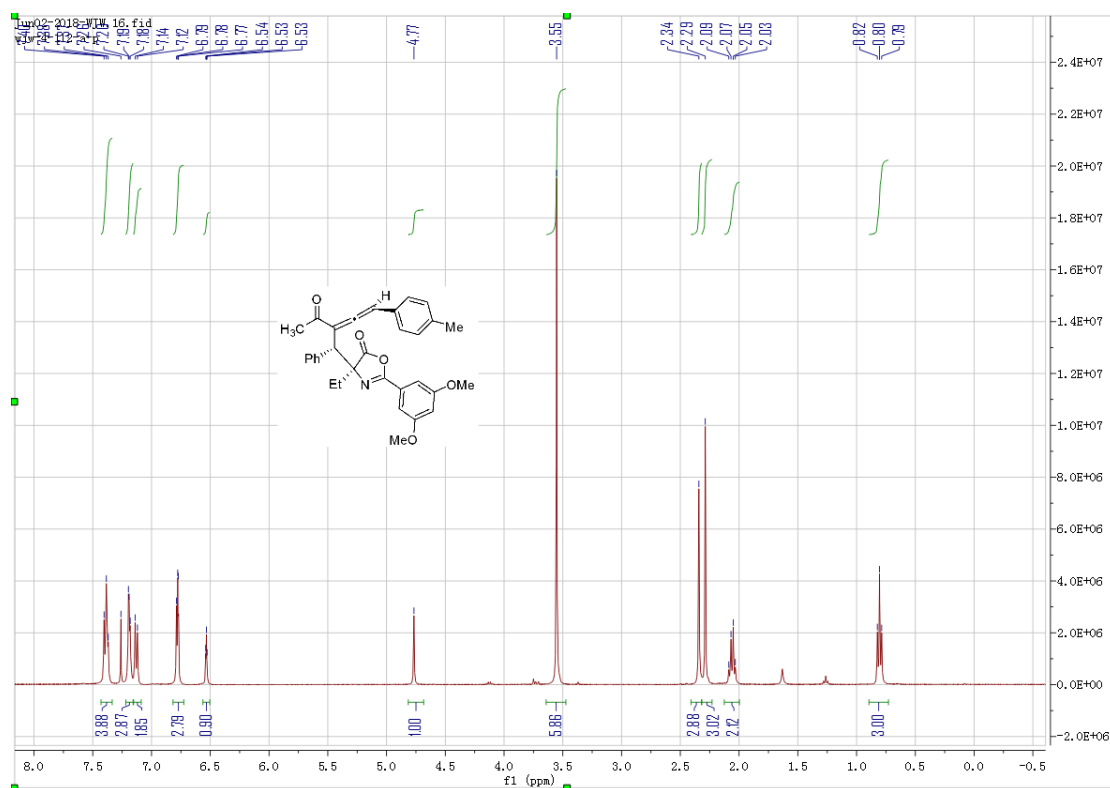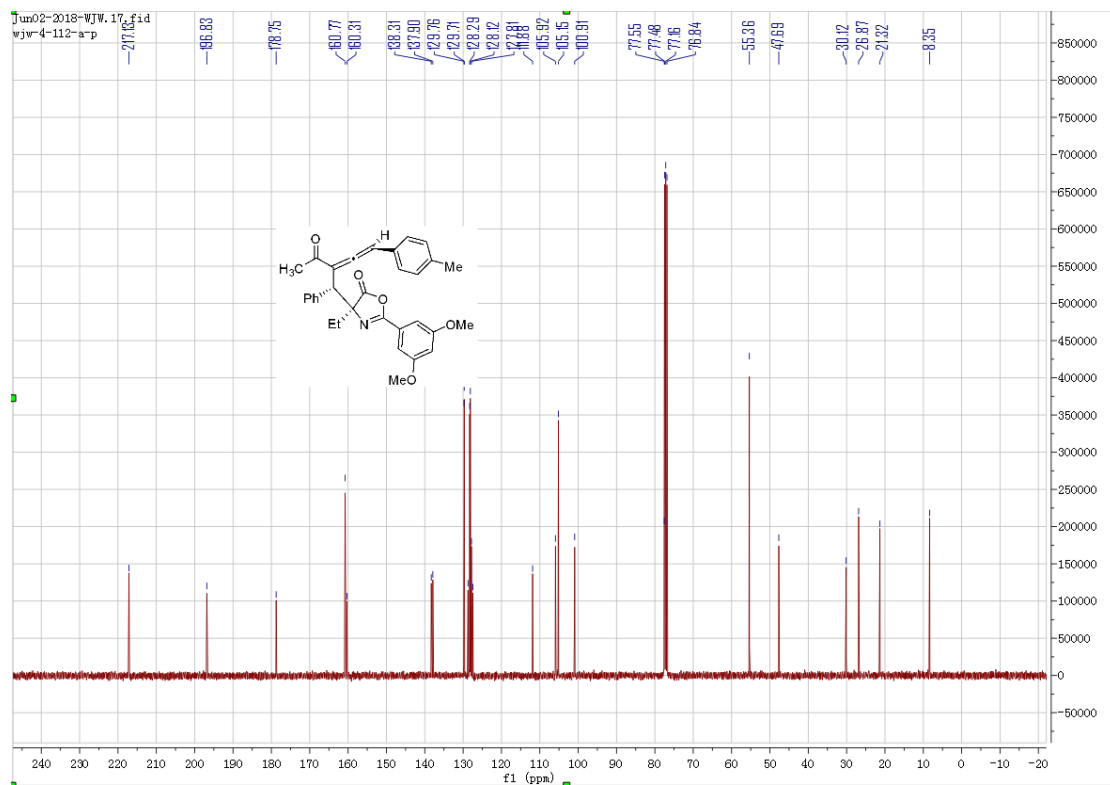

(S)-4-((1*R*,3*S*)-2-acetyl-4-(4-chlorophenyl)-1-phenylbuta-2,3-dien-1-yl)-2-(3,5-dimethoxyphenyl)-4-ethyloxazol-5(4H)-one (**4c**)

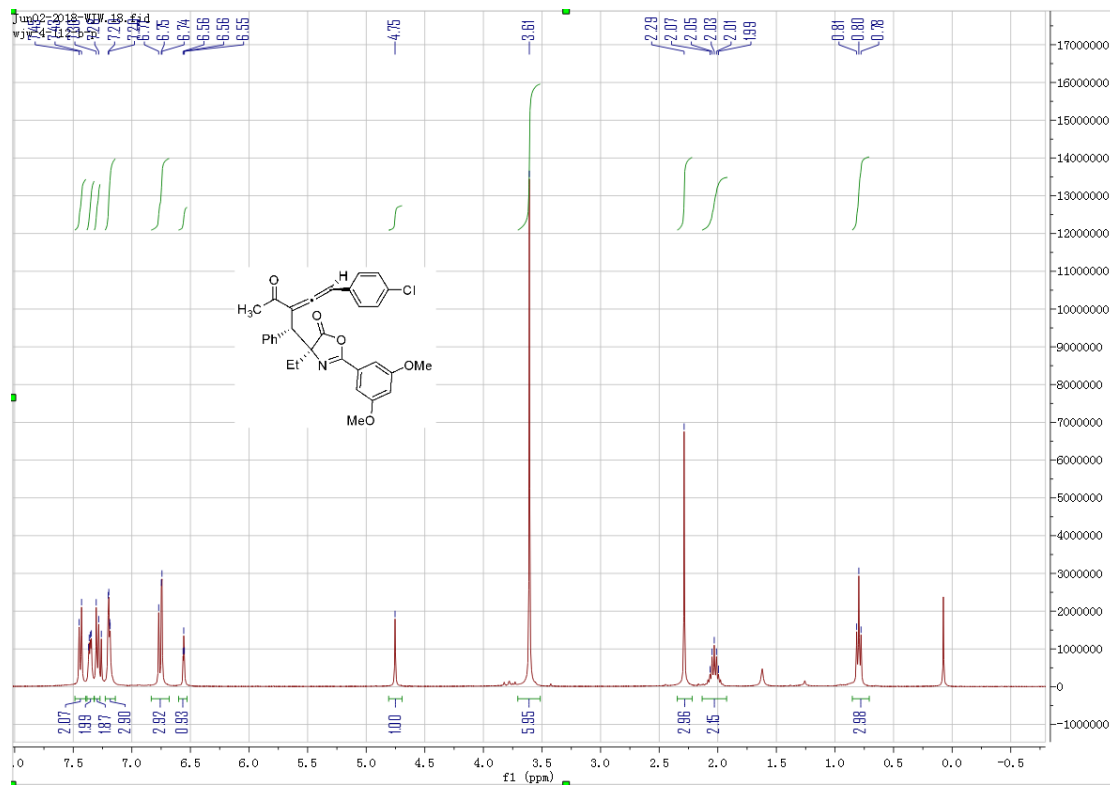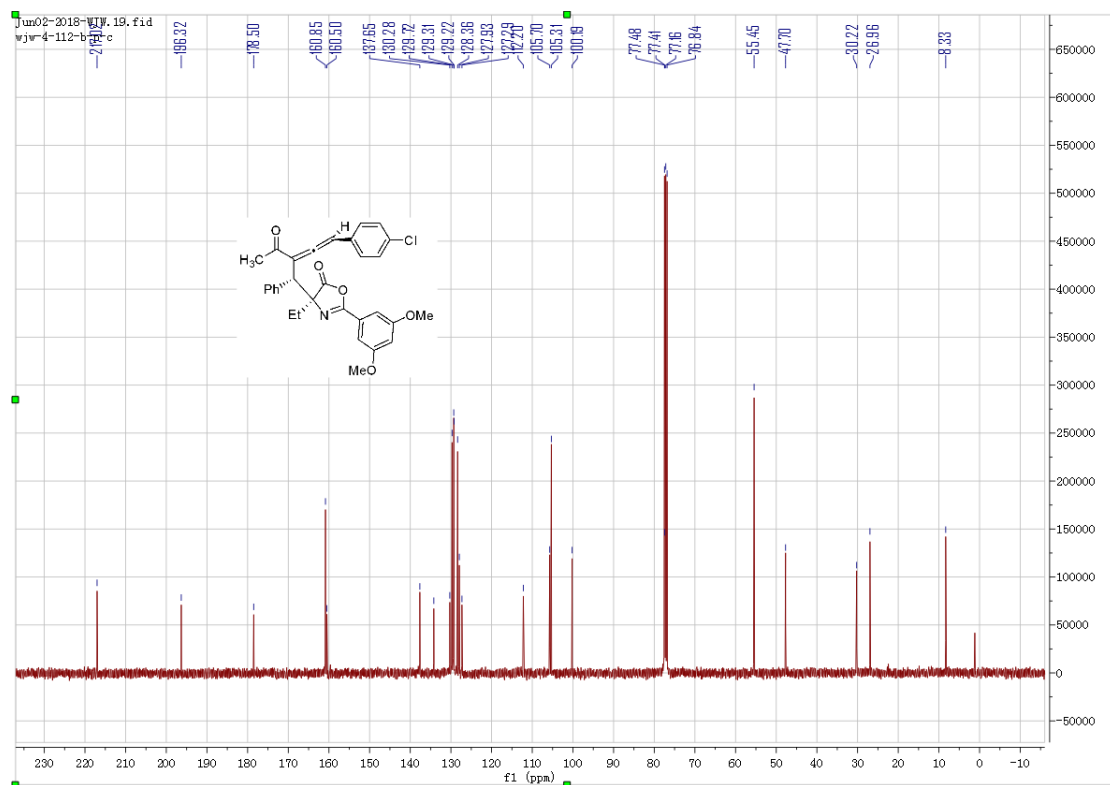

(S)-4-((1*R*,3*S*)-2-acetyl-4-(4-methoxyphenyl)-1-phenylbuta-2,3-dien-1-yl)-2-(3,5-dimethoxyphenyl)-4-ethyloxazol-5(4*H*)-one (4*d*)

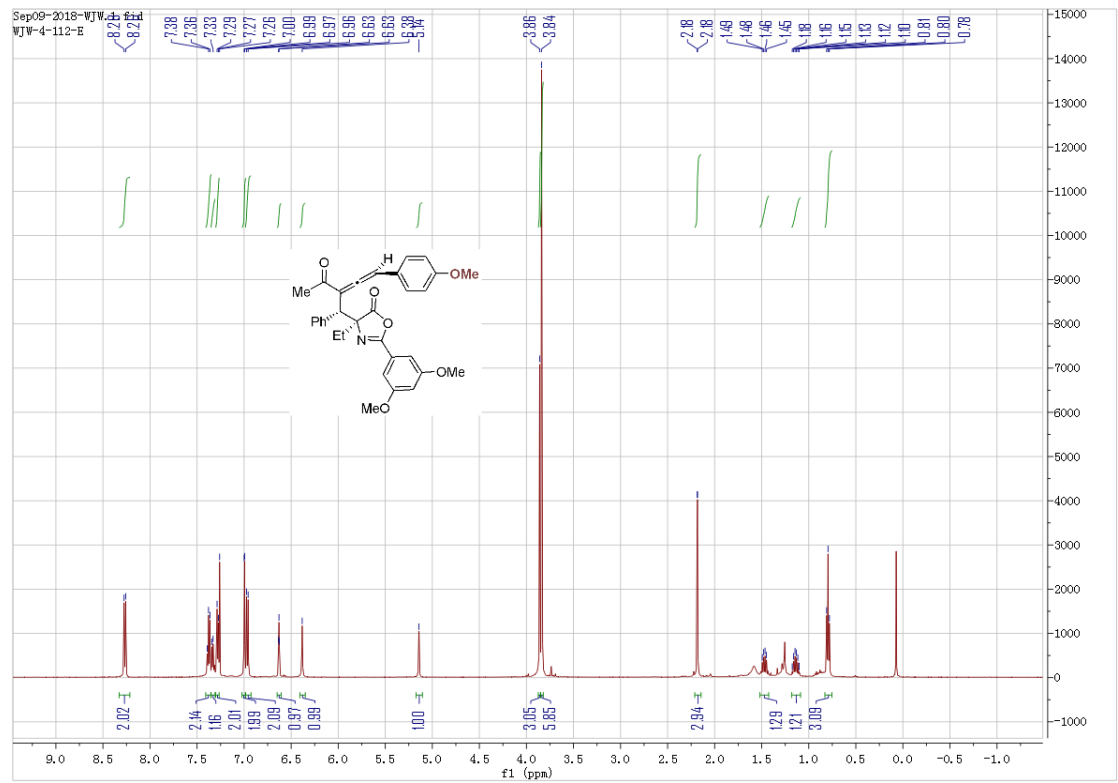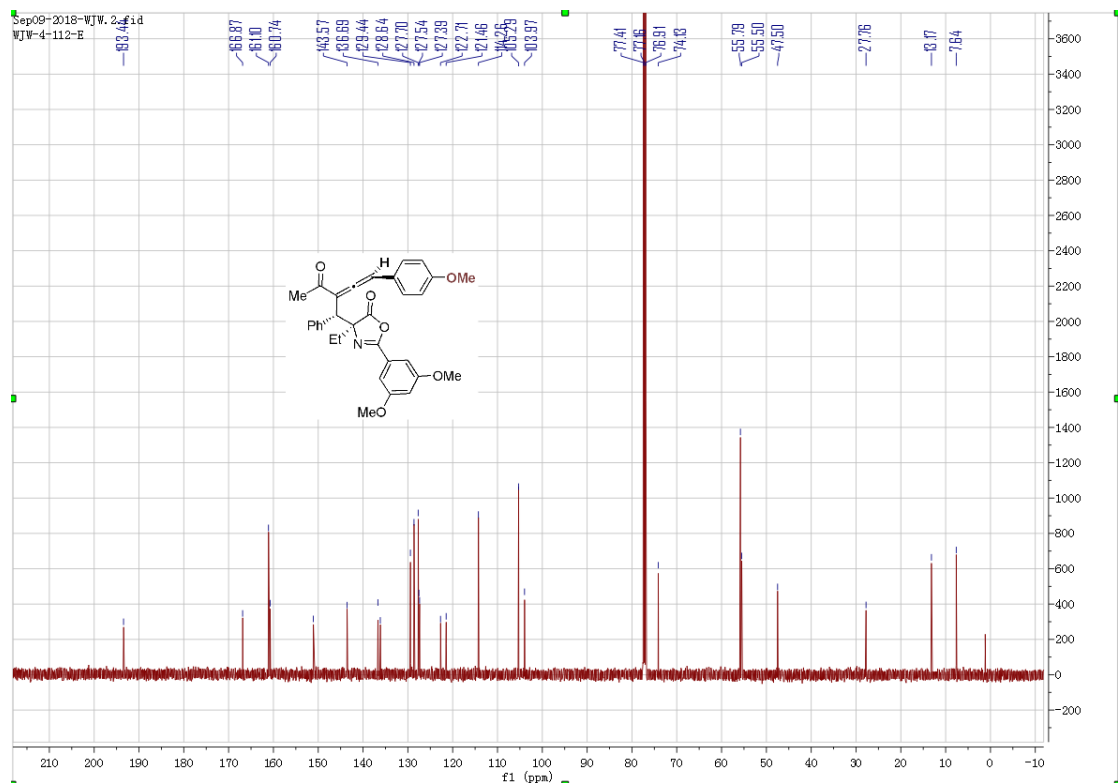



-4-((1*R*,3*S*)-2-acetyl-4-(4-fluorophenyl)-1-phenylbuta-2,3-dien-1-yl)-2-(3,5-dimethoxyphenyl)-4-ethyl-  
 zazol-5(4*H*)-one (**4e**)

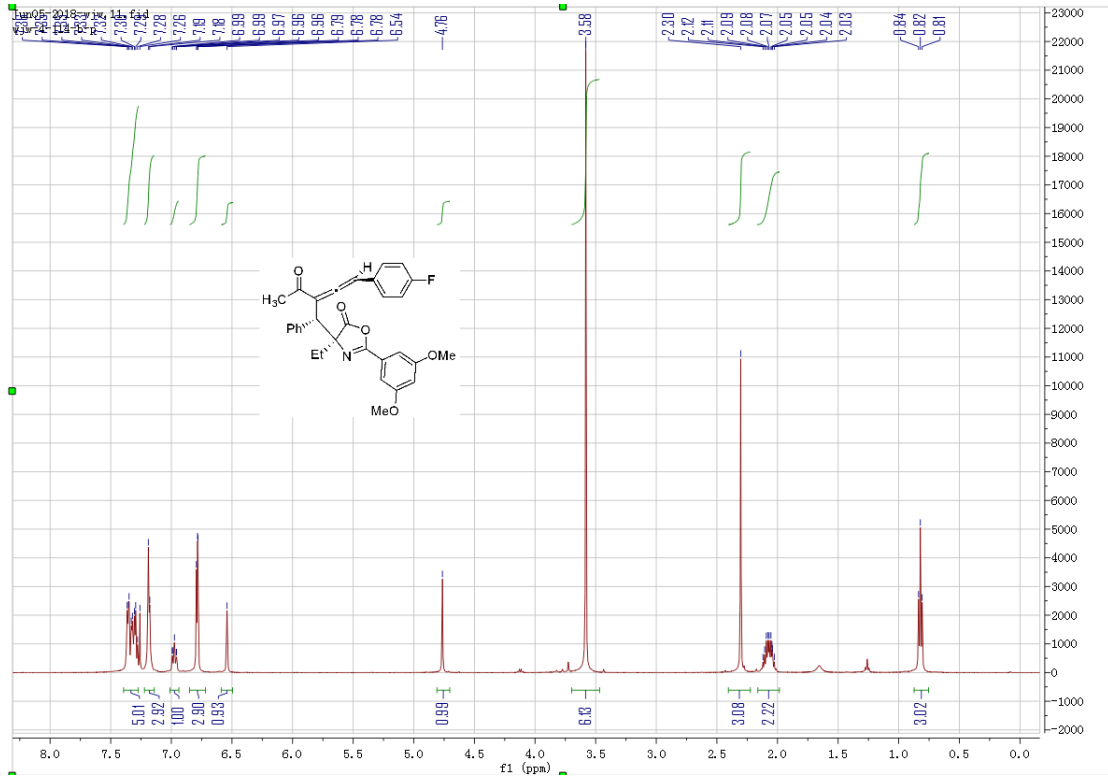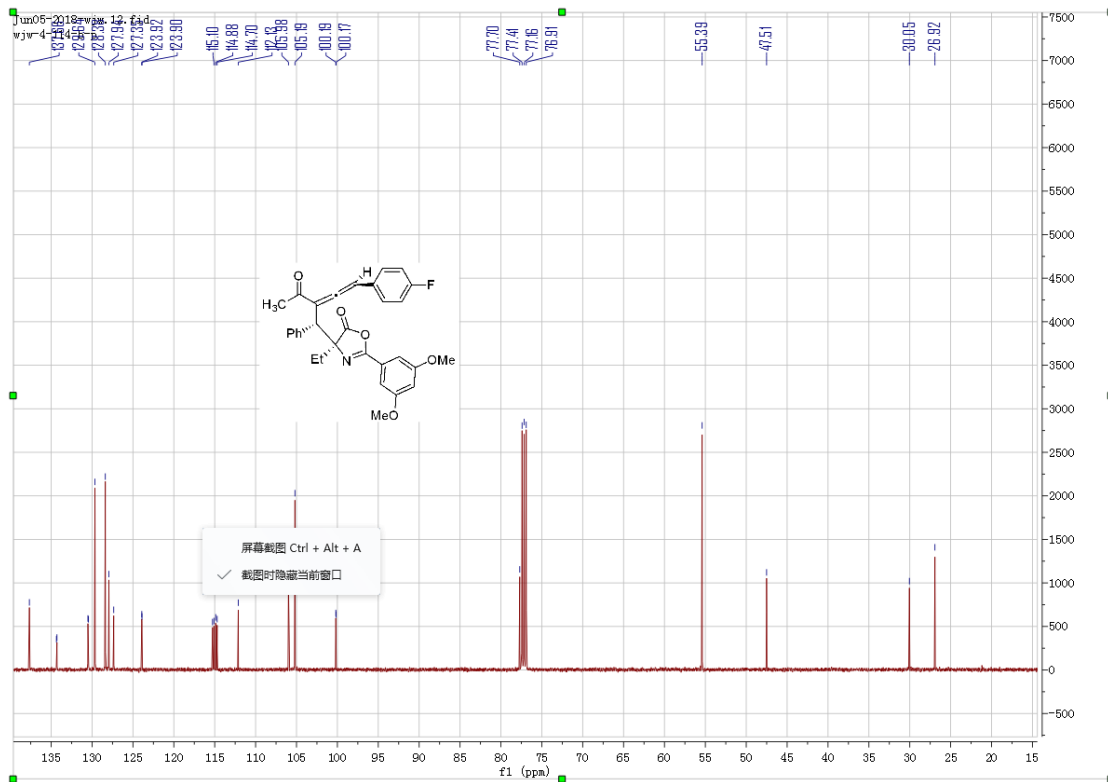

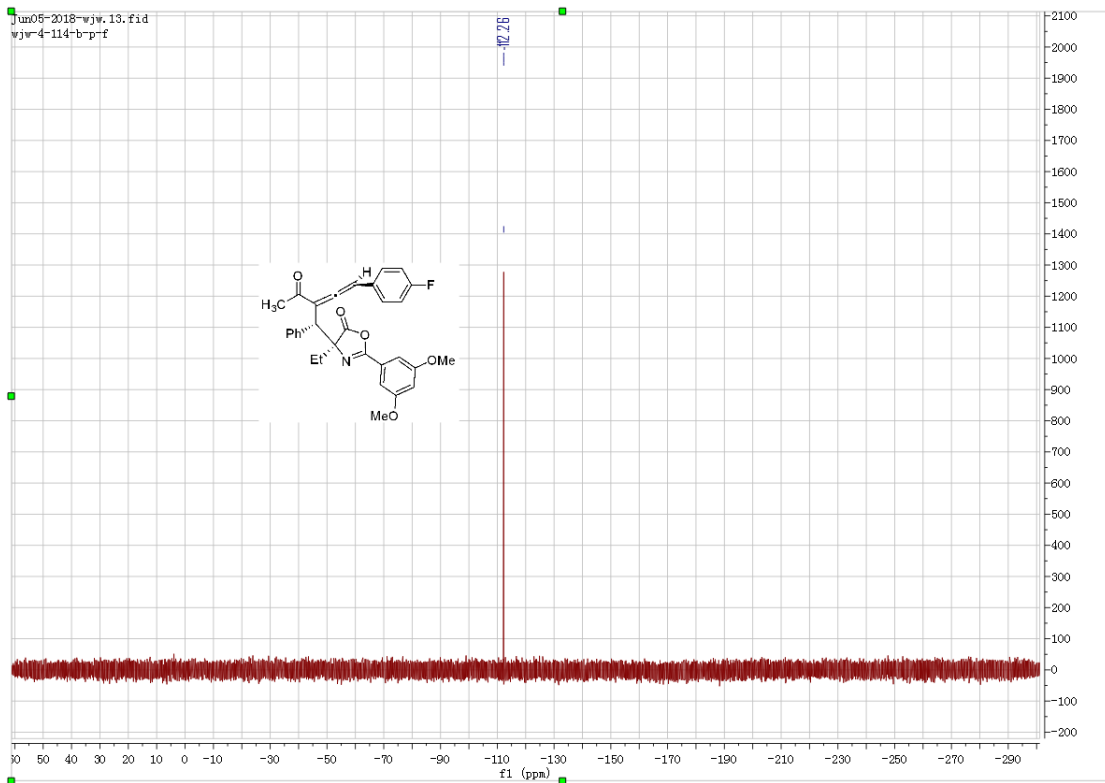

(S)-4-((1*R*,3*S*)-2-acetyl-1-phenyl-4-(4-(trifluoromethyl)phenyl)buta-2,3-dien-1-yl)-2-(3,5-dimethoxyphenyl)-4-ethyloxazol-5(4H)-one (**4f**)

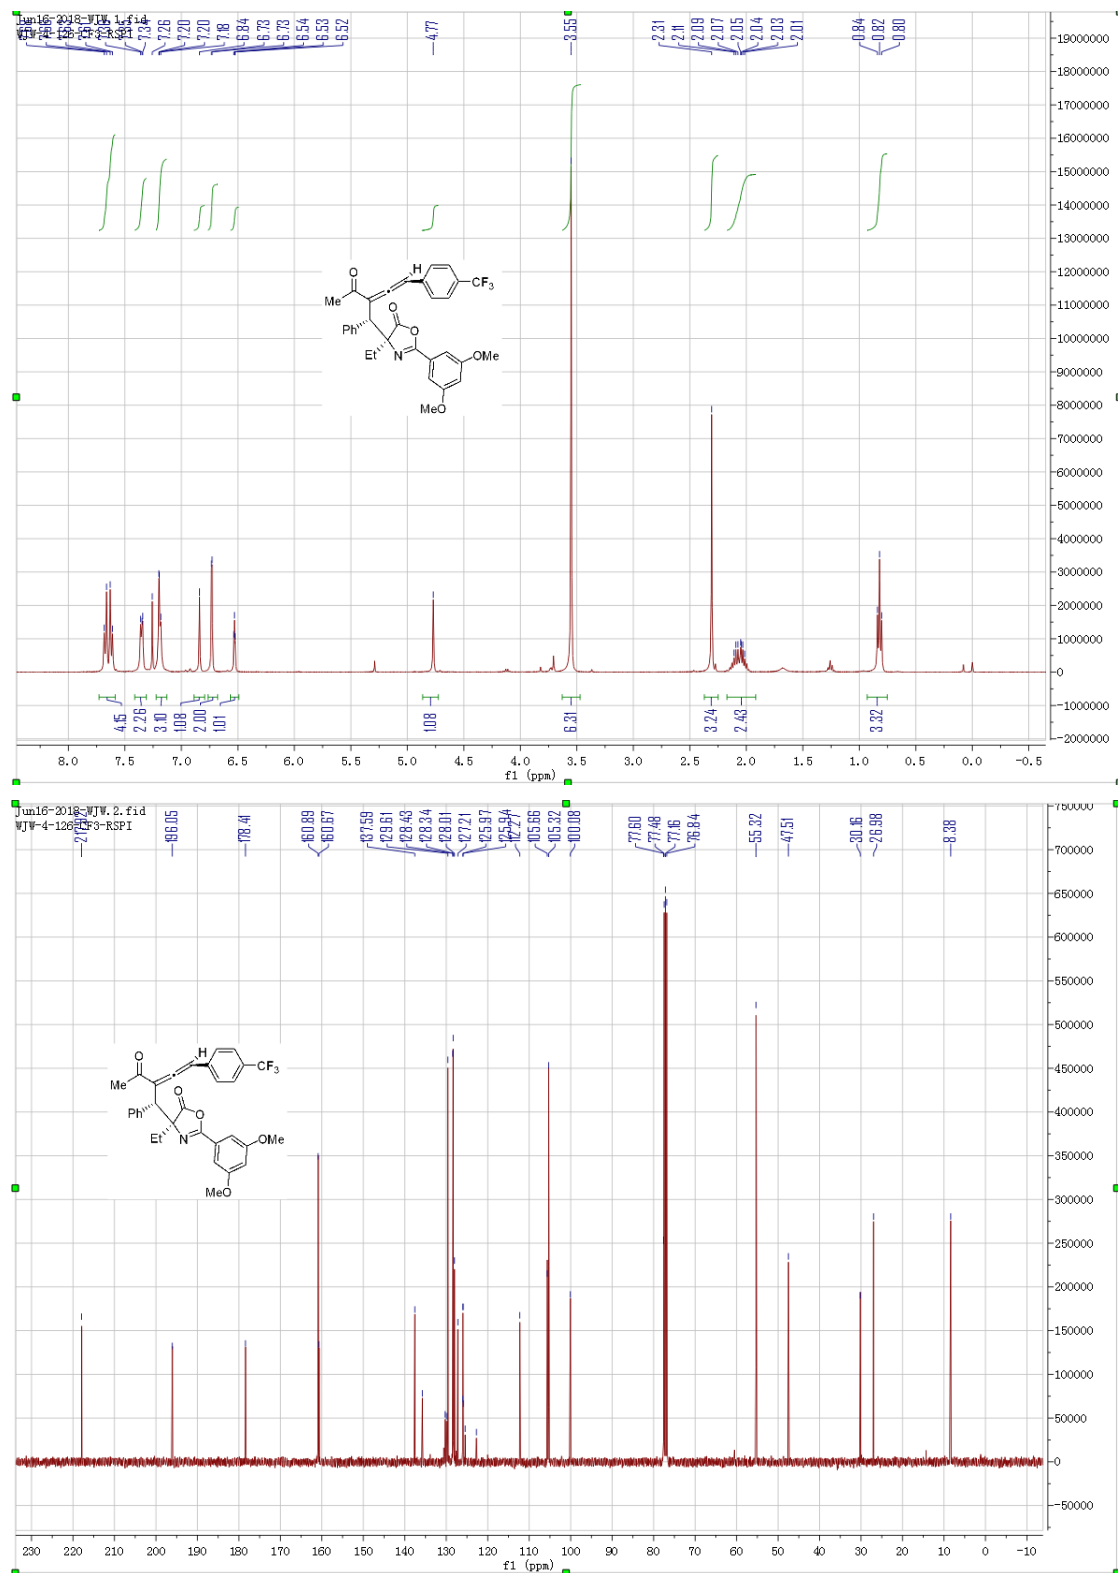

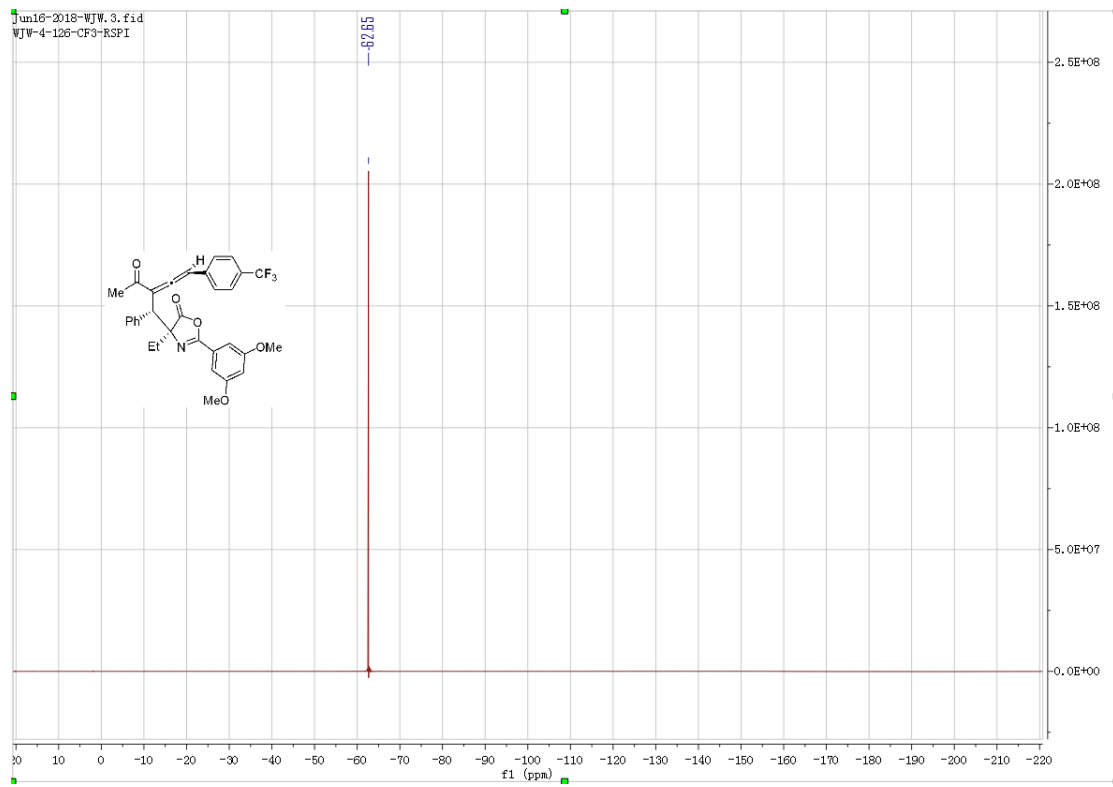

Methyl 3-((S)-3-((R)-((S)-2-(3,5-dimethoxyphenyl)-4-ethyl-5-oxo-4,5-dihydrooxazol-4-yl)  
 (phenyl)methyl)-4-oxopenta-1,2-dien-1-yl)benzoate (**4g**)

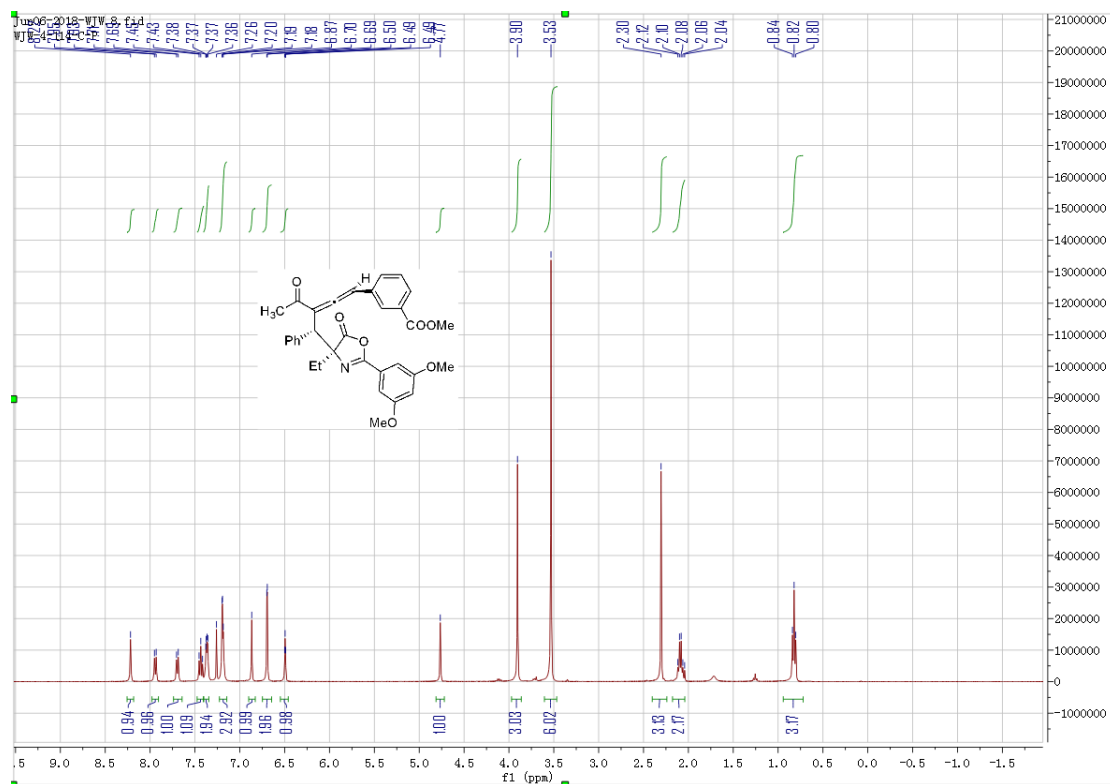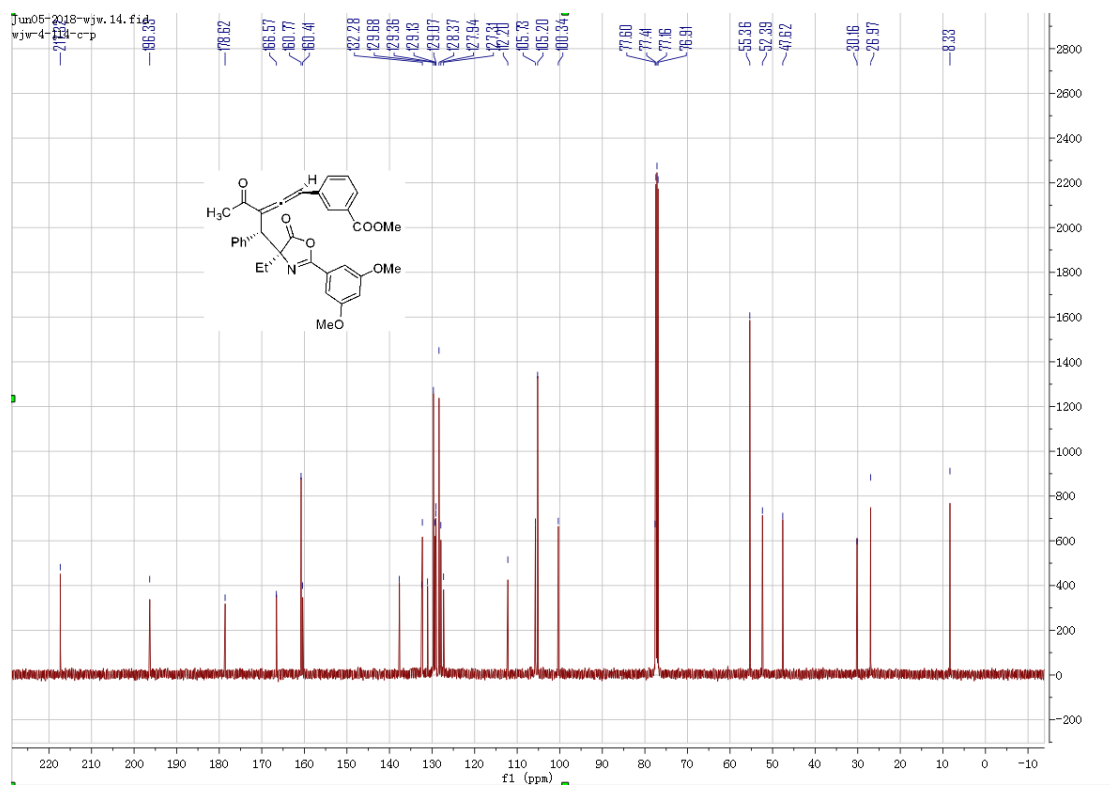

(S)-4-((1*R*,3*S*)-2-acetyl-4-(2-chlorophenyl)-1-phenylbuta-2,3-dien-1-yl)-2-(3,5-dimethoxyphenyl)-4-ethyloxazol-5(4H)-one (**4h**)

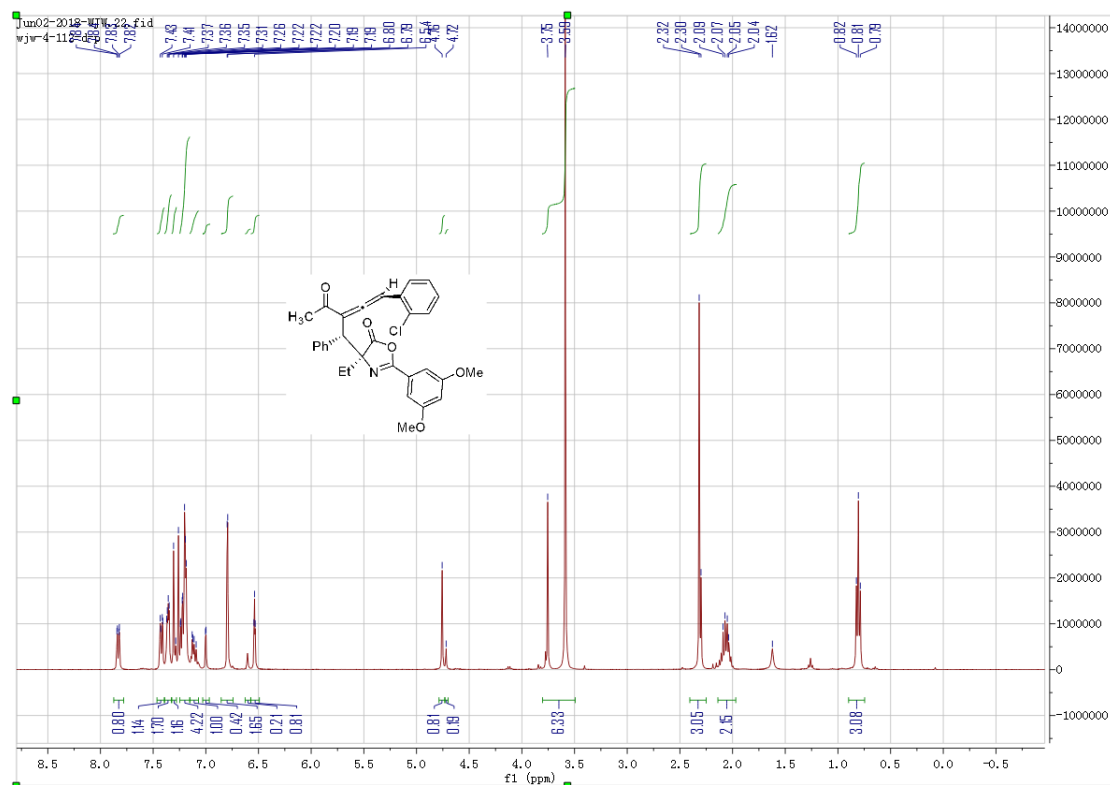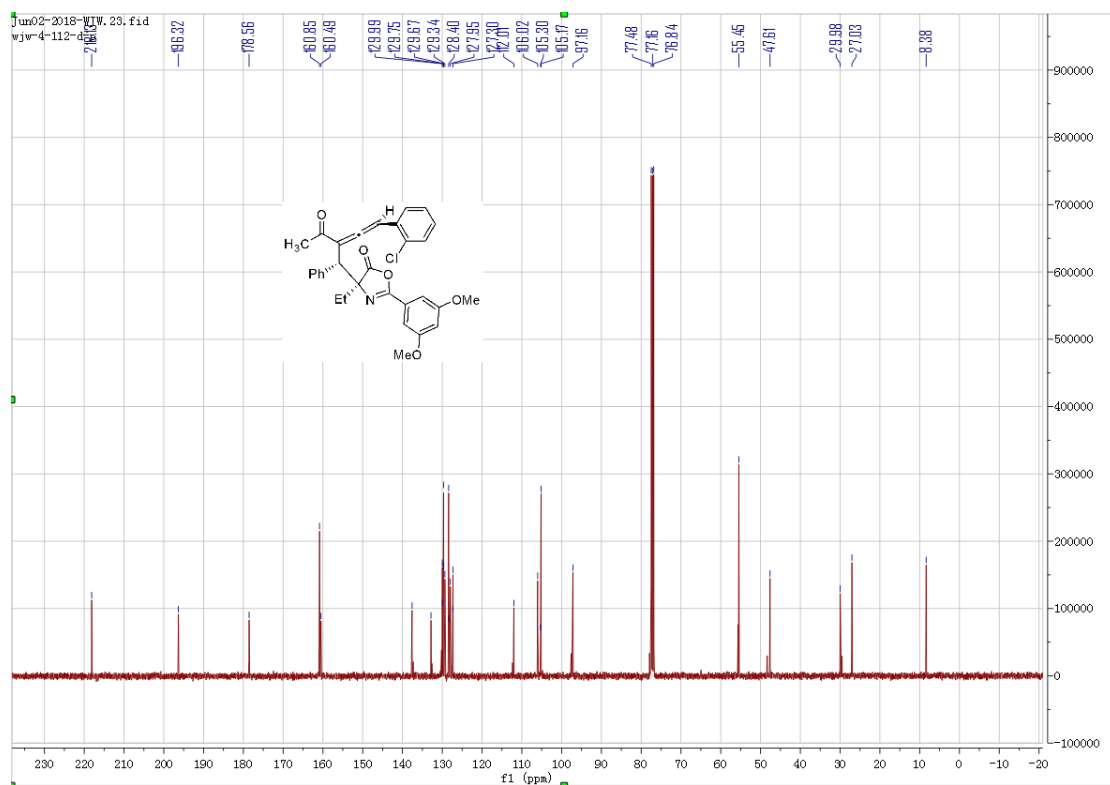

(S)-4-((1*R*,3*R*)-2-acetyl-1-phenyl-4-(thiophen-3-yl)buta-2,3-dien-1-yl)-2-(3,5-dimethoxyphenyl)-4-ethylloxazol-5(4*H*)-one (**4i**)

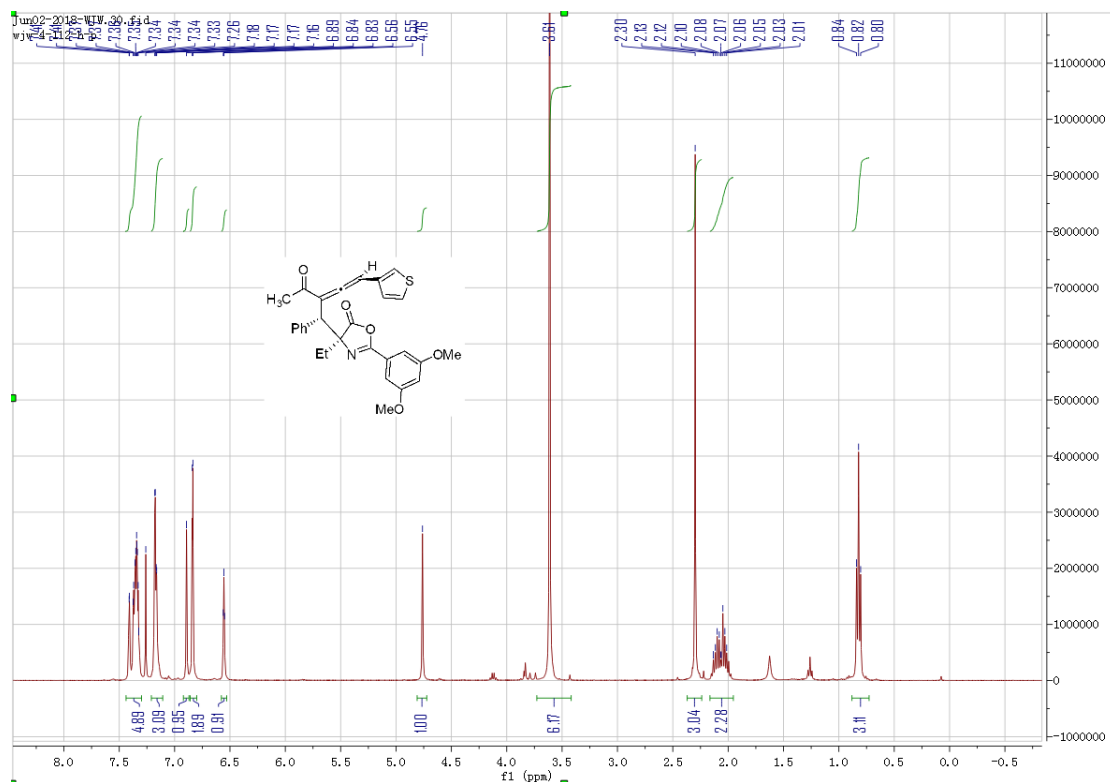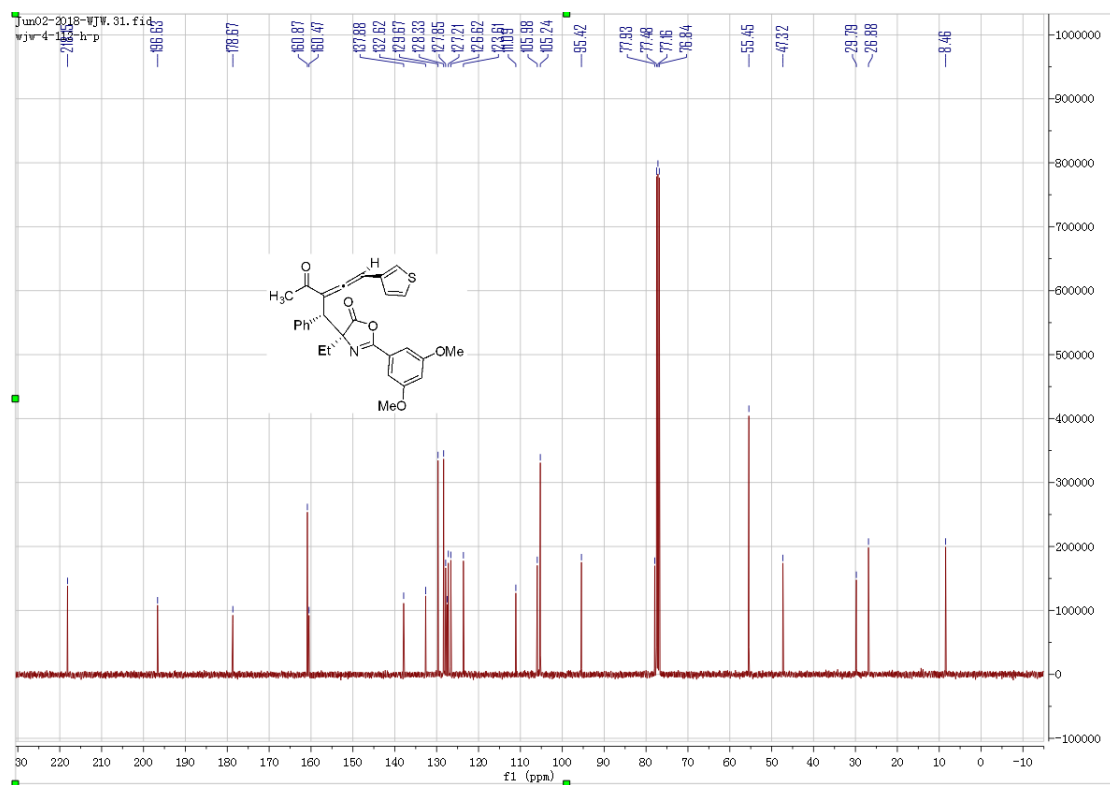

(S)-4-((1*R*,3*S*)-2-acetyl-4-(cyclohex-1-en-1-yl)-1-phenylbuta-2,3-dien-1-yl)-2-(3,5-dimethoxyphenyl)-4-ethyl-5H-imidazol-5-one (**4j**)

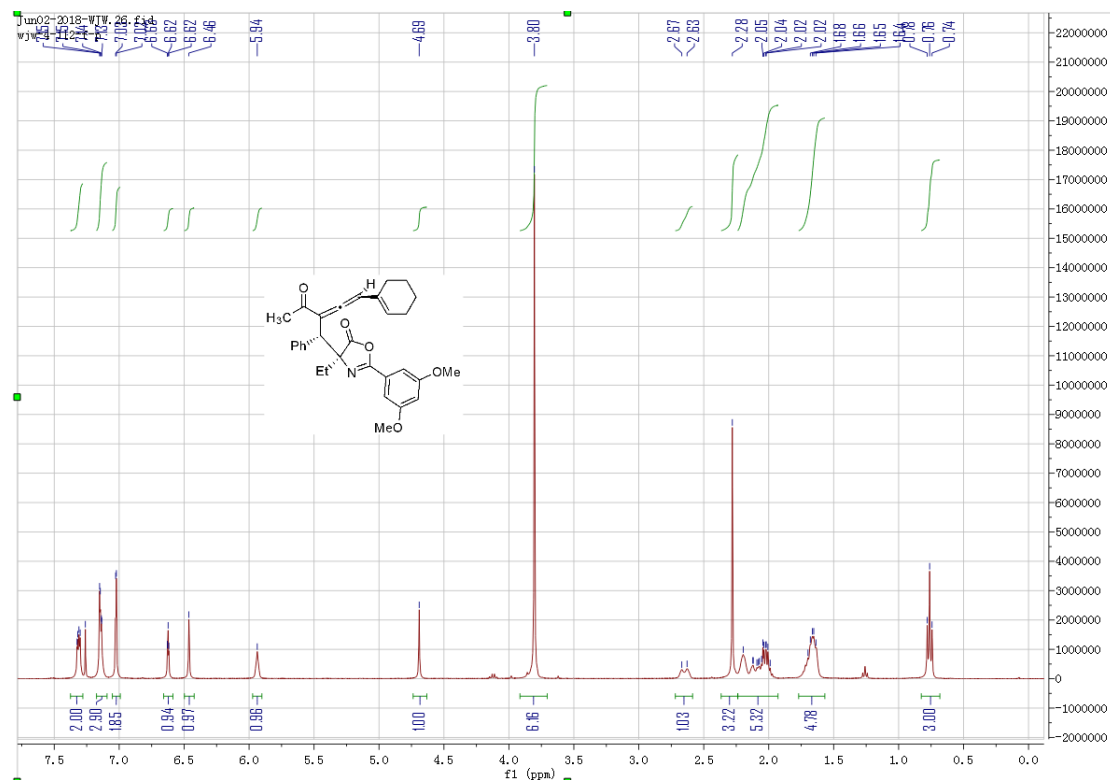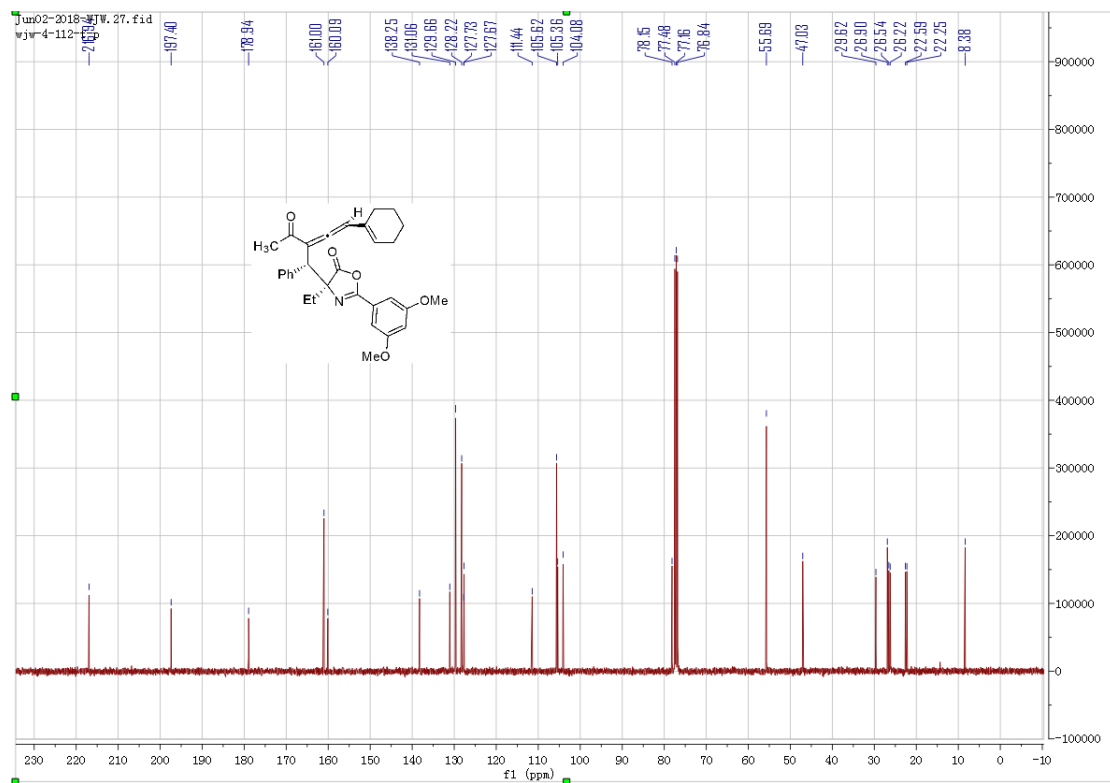



(S)-4-((1*R*,3*S*)-2-acetyl-1-phenylocta-2,3-dien-1-yl)-2-(3,5-dimethoxyphenyl)-4-ethyloxazol-5(4H)-one

(4k)

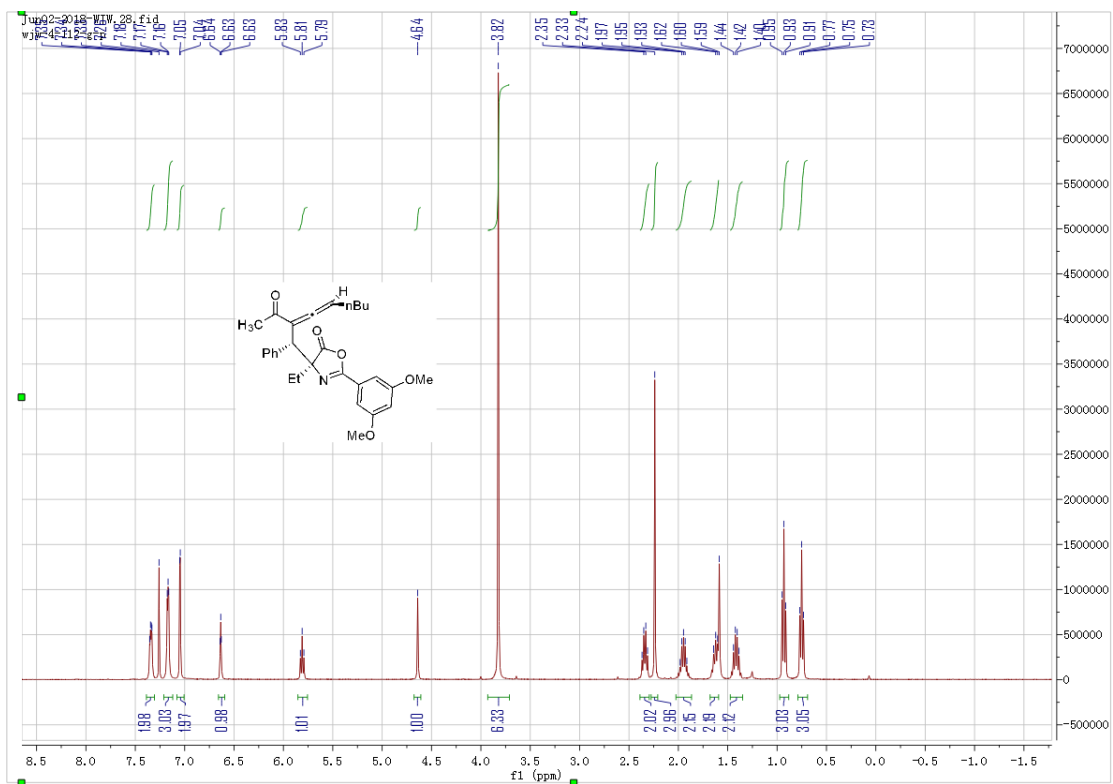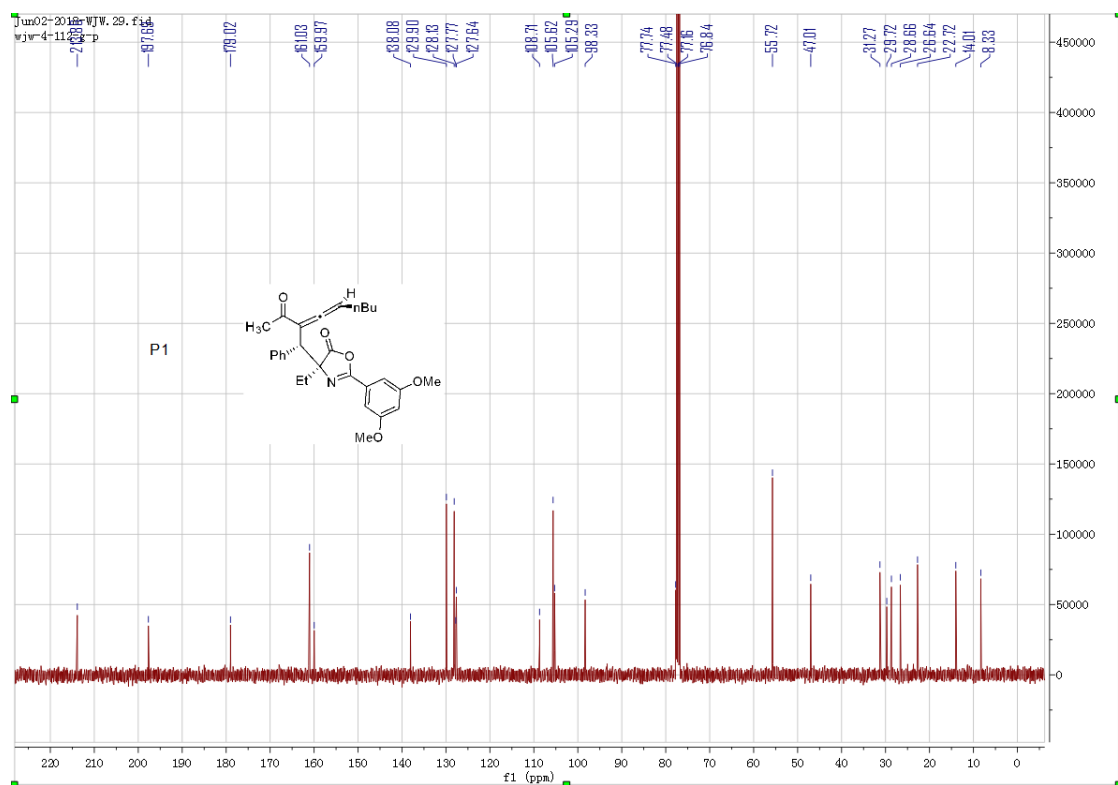

(S)-4-((1*R*,3*S*)-2-acetyl-4-phenyl-1-(p-tolyl)buta-2,3-dien-1-yl)-2-(3,5-dimethoxyphenyl)-4-ethyloxazol-5(4H)-one (**4l**)

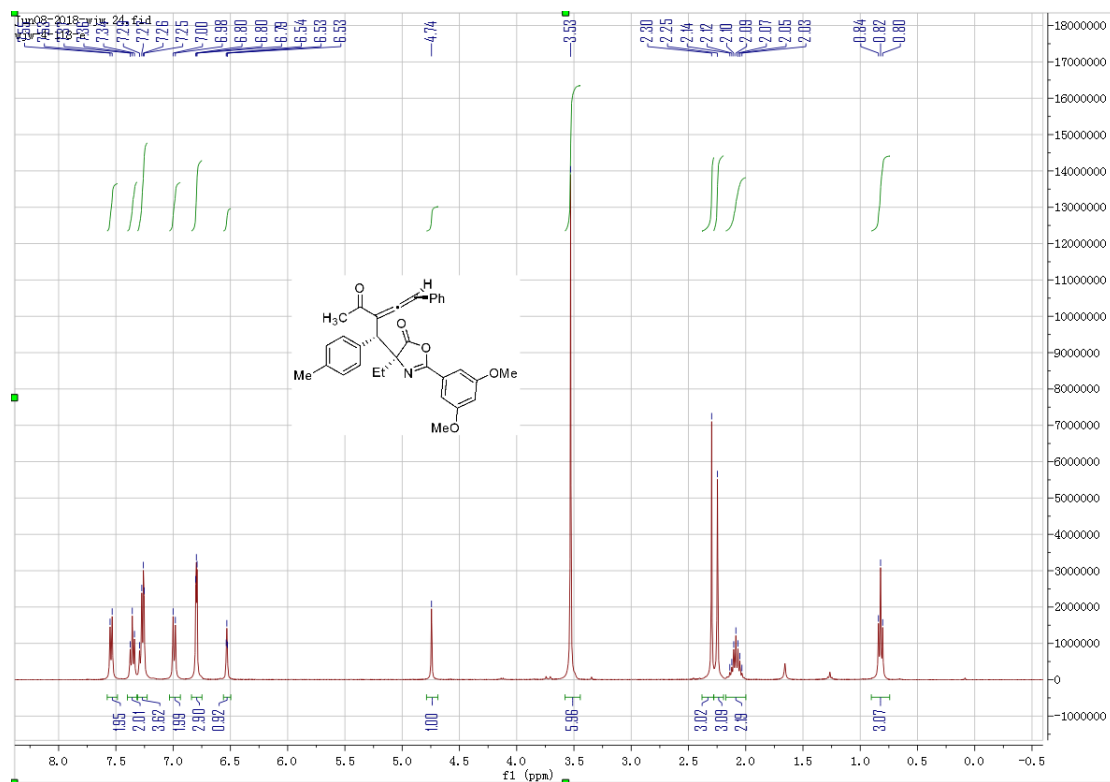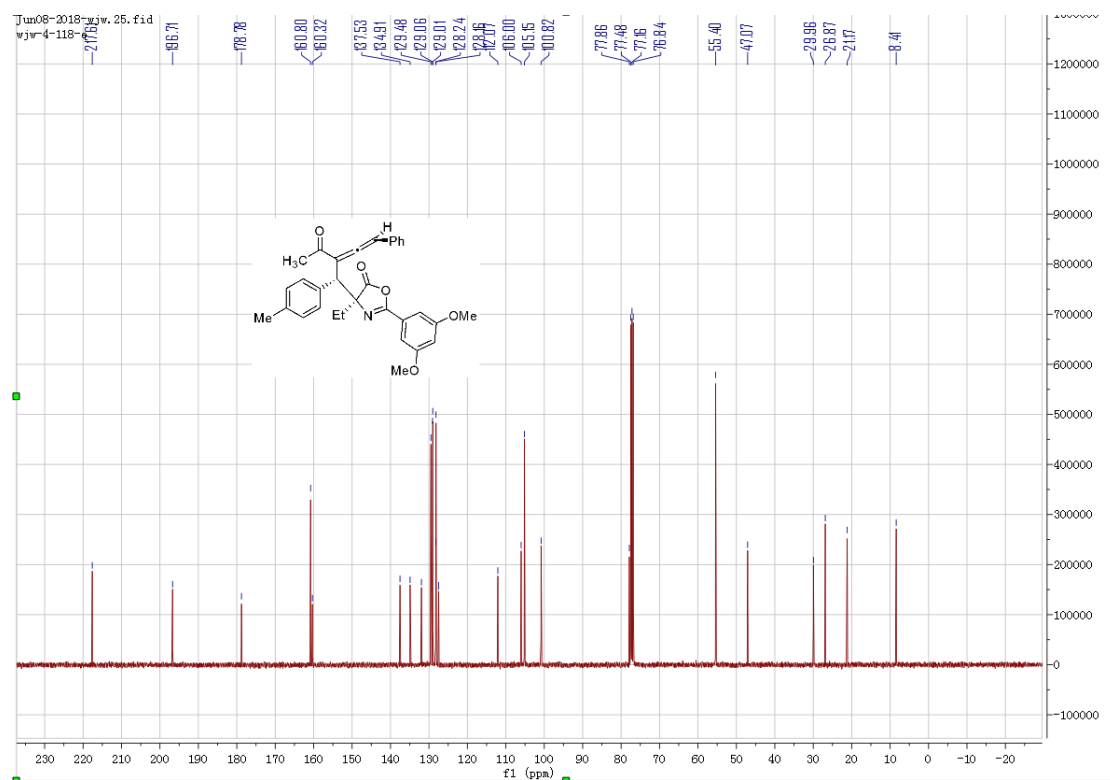

(*S*)-4-((*1R,3S*)-2-acetyl-1-(4-fluorophenyl)-4-phenylbuta-2,3-dien-1-yl)-2-(3,5-dimethoxyphenyl)-4-ethyloxazol-5(4H)-one (**4m**)

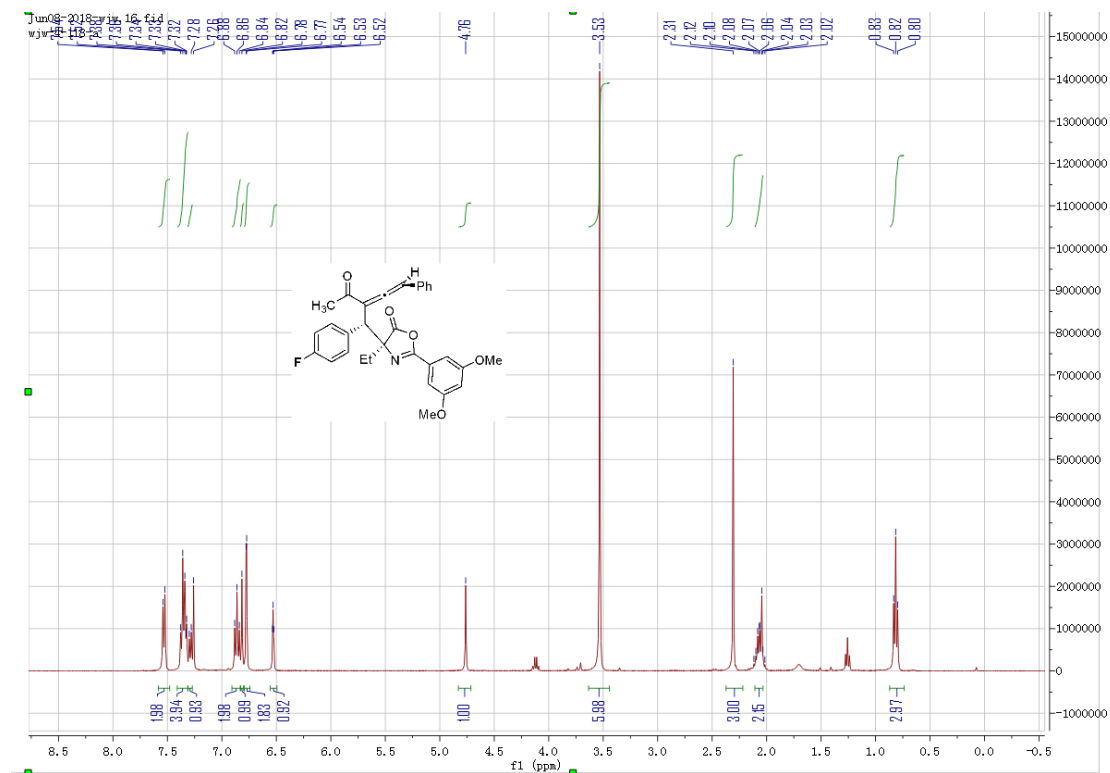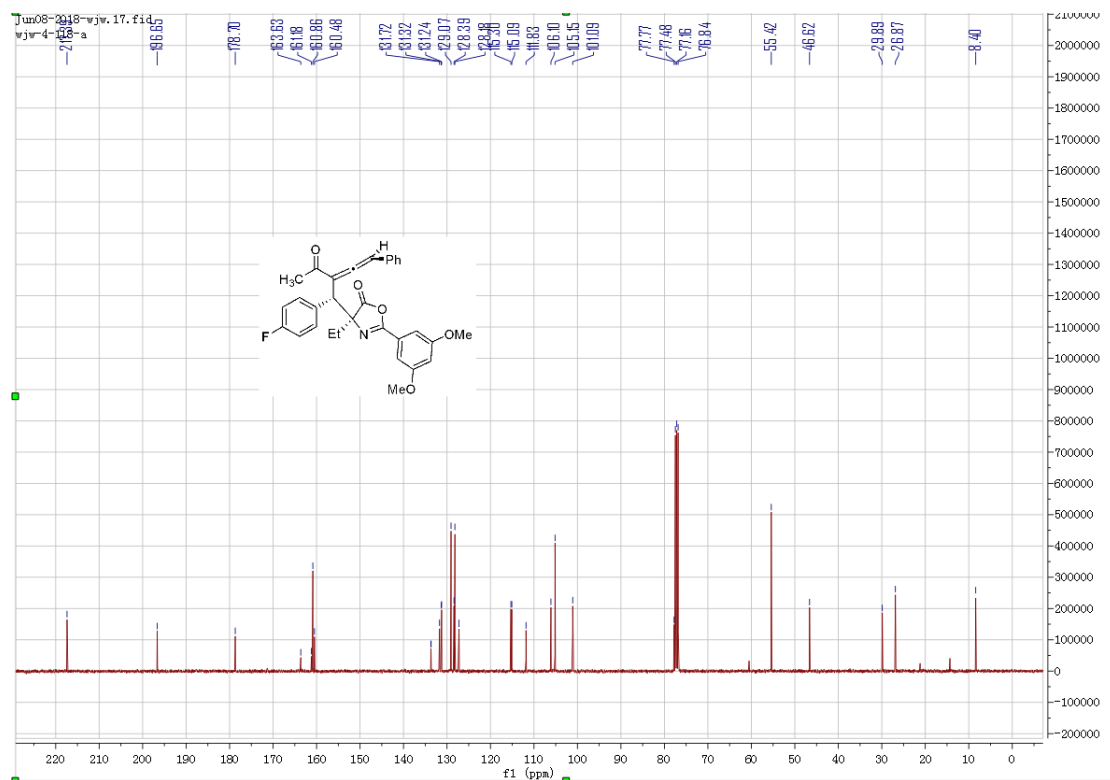

Jun11-2018-wjw.4.fid  
WJW-4-118-A-P

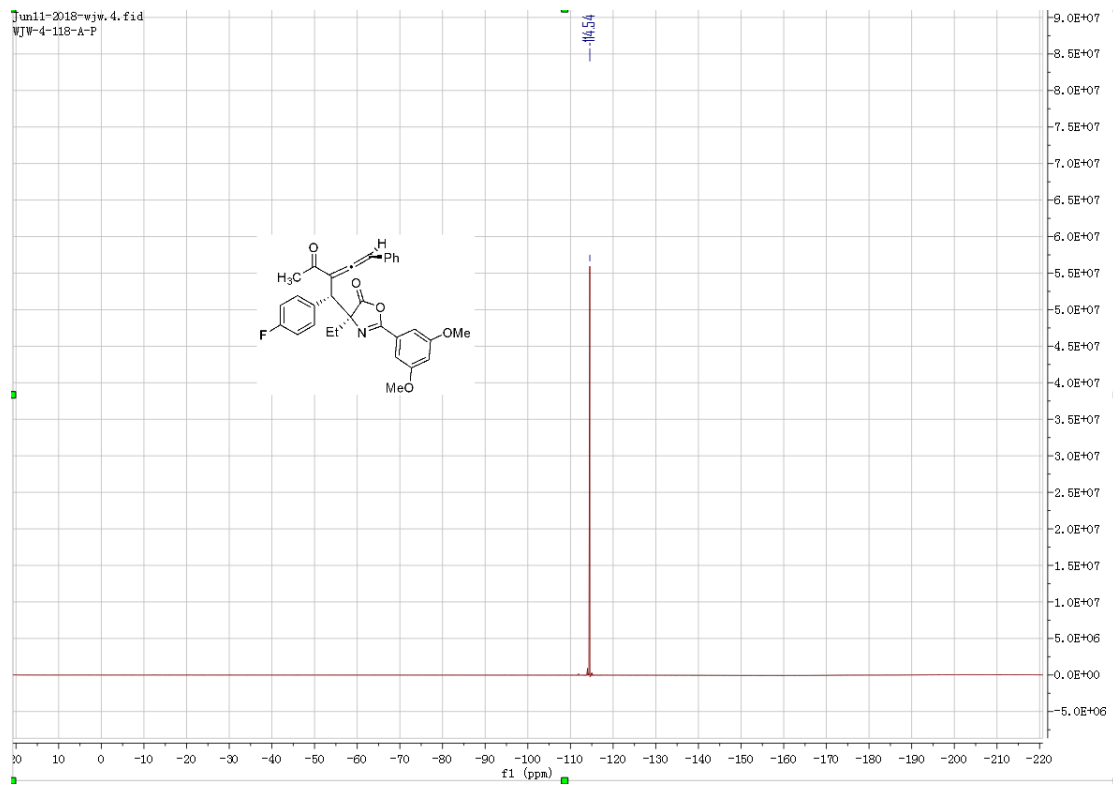

(S)-4-((1*R*,3*S*)-2-acetyl-1-(4-chlorophenyl)-4-phenylbuta-2,3-dien-1-yl)-2-(3,5-dimethoxyphenyl)-4-ethyloxazol-5(4*H*)-one (**4n**)

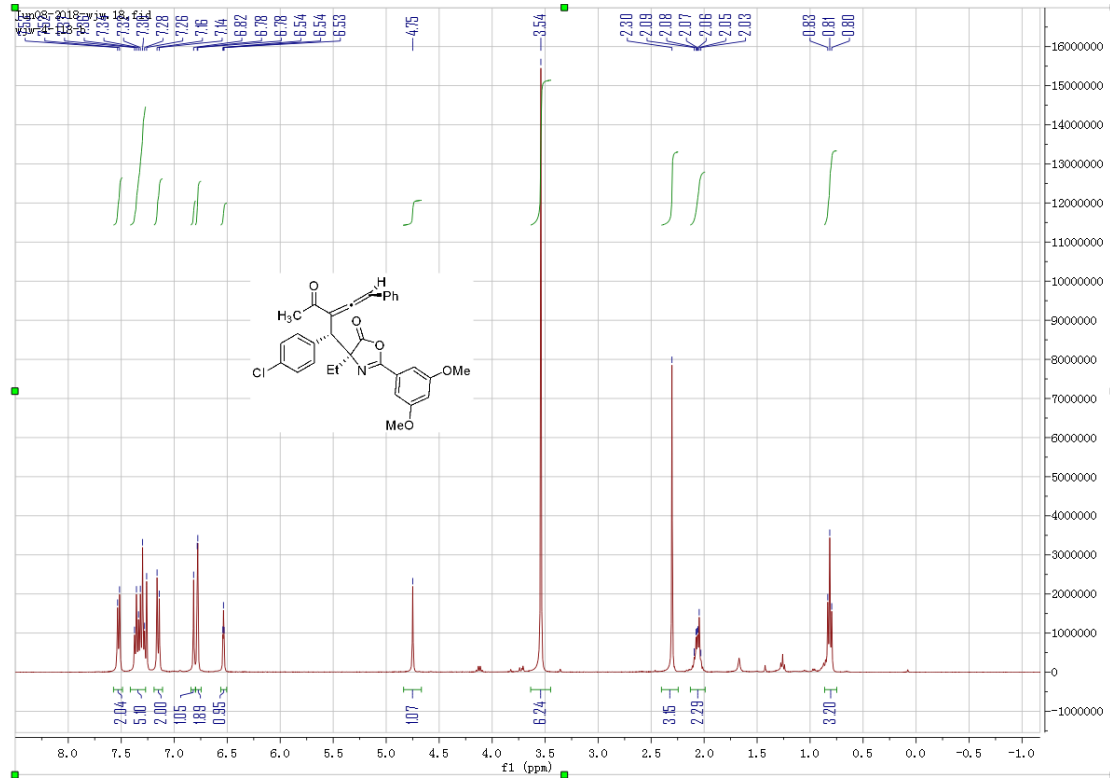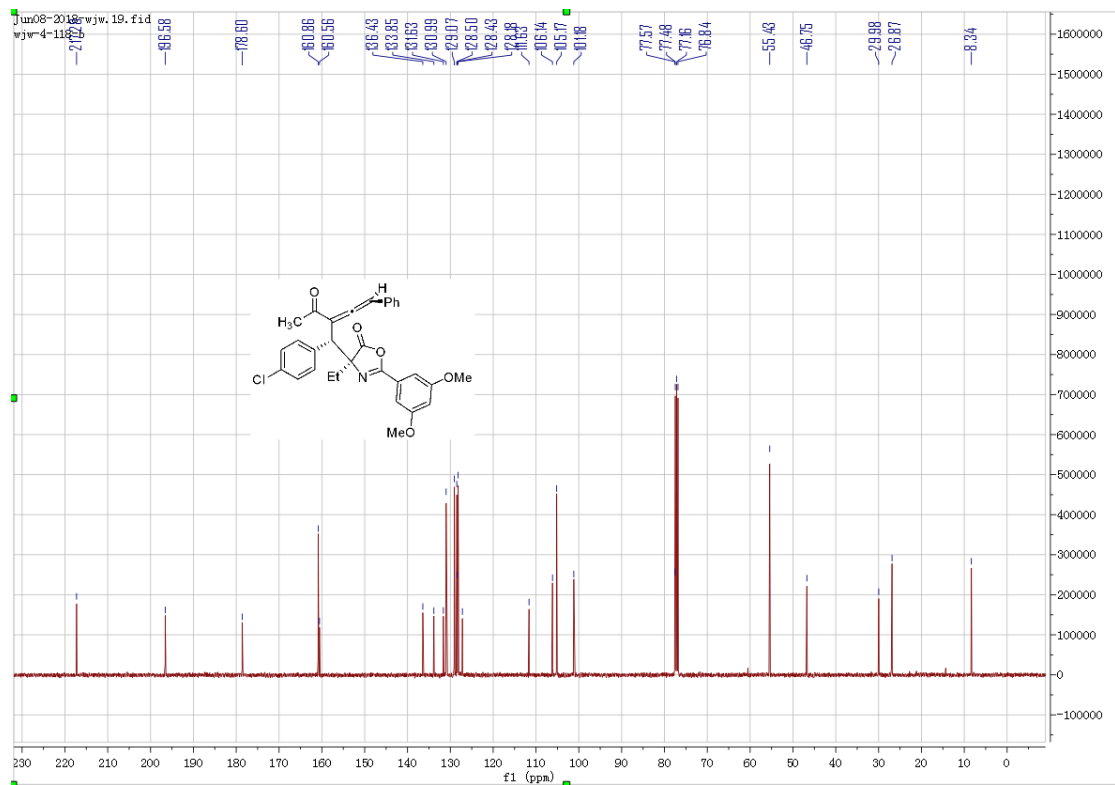

(S)-4-((1*R*,3*S*)-2-acetyl-1-(4-methoxyphenyl)-4-phenylbuta-2,3-dien-1-yl)-2-(3,5-dimethoxyphenyl)-4-ethoxazol-5(4*H*)-one (**40**)

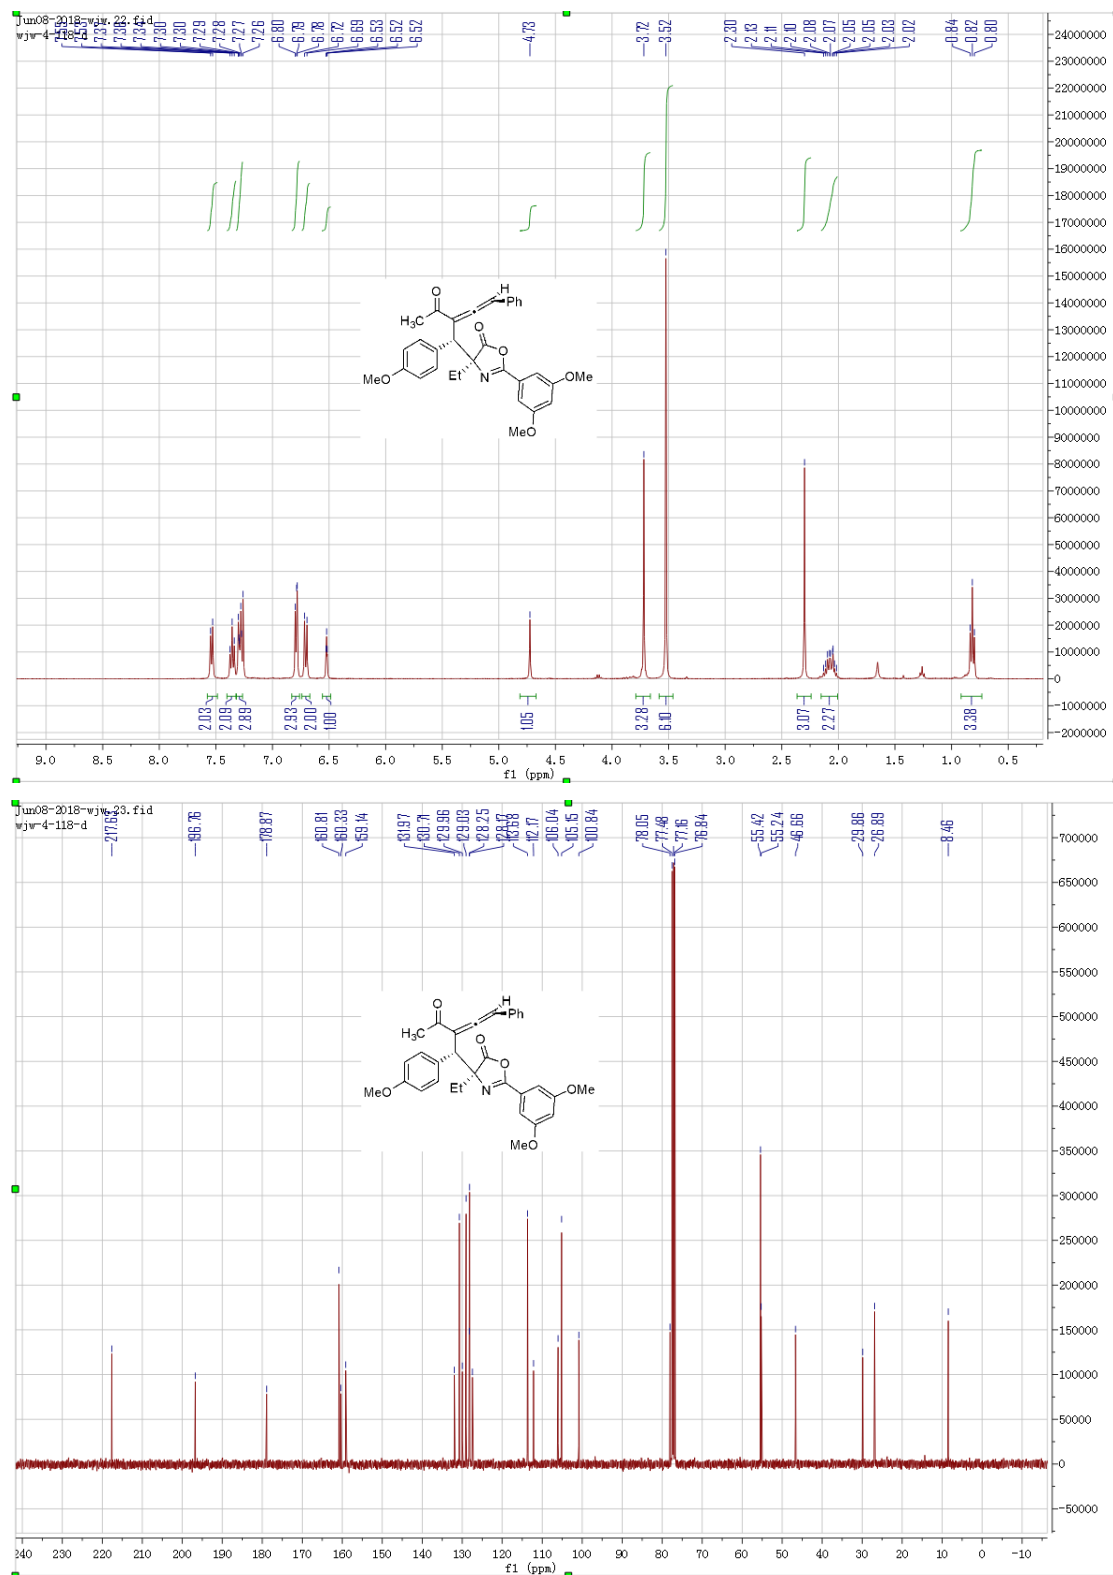

(S)-4-((1*R*,3*S*)-2-acetyl-1-(naphthalen-2-yl)-4-phenylbuta-2,3-dien-1-yl)-2-(3,5-dimethoxyphenyl)-4-ethyloxazol-5(4*H*)-one (**4p**)

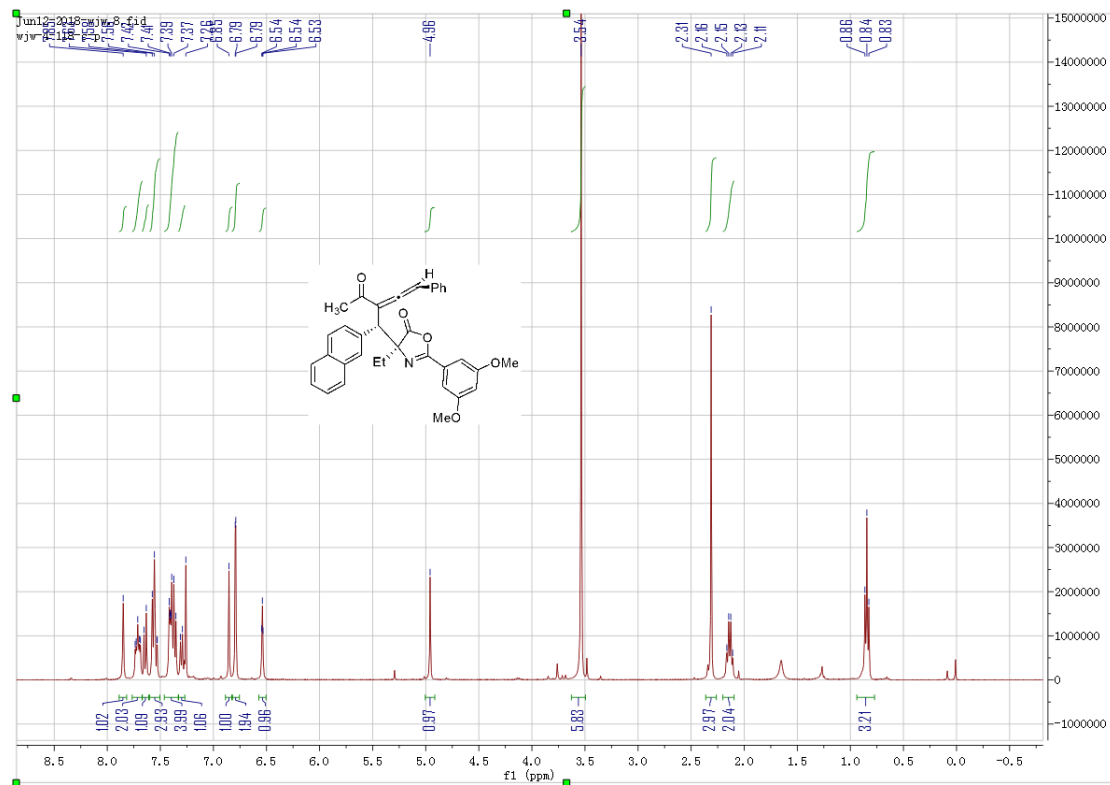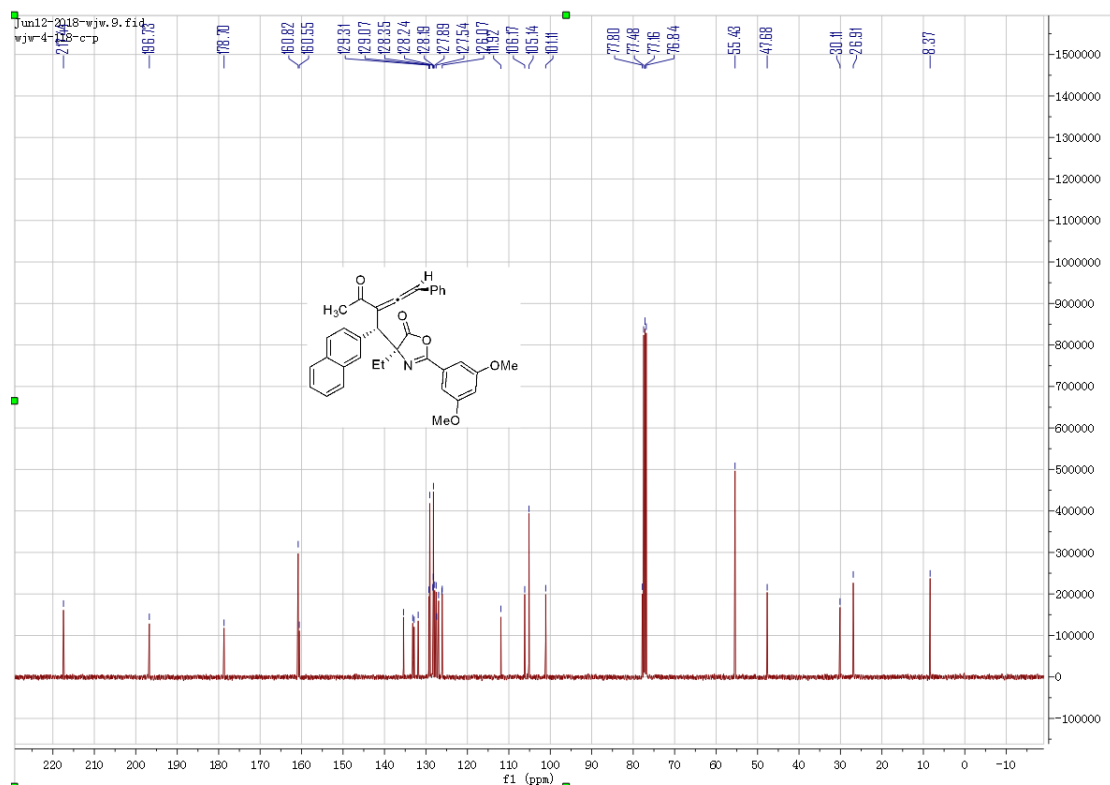

(S)-4-((1*R*,3*S*)-2-acetyl-1-cyclohexyl-4-phenylbuta-2,3-dien-1-yl)-2-(3,5-dimethoxyphenyl)-4-ethyloxazol-5(4*H*)-one (**4q**)

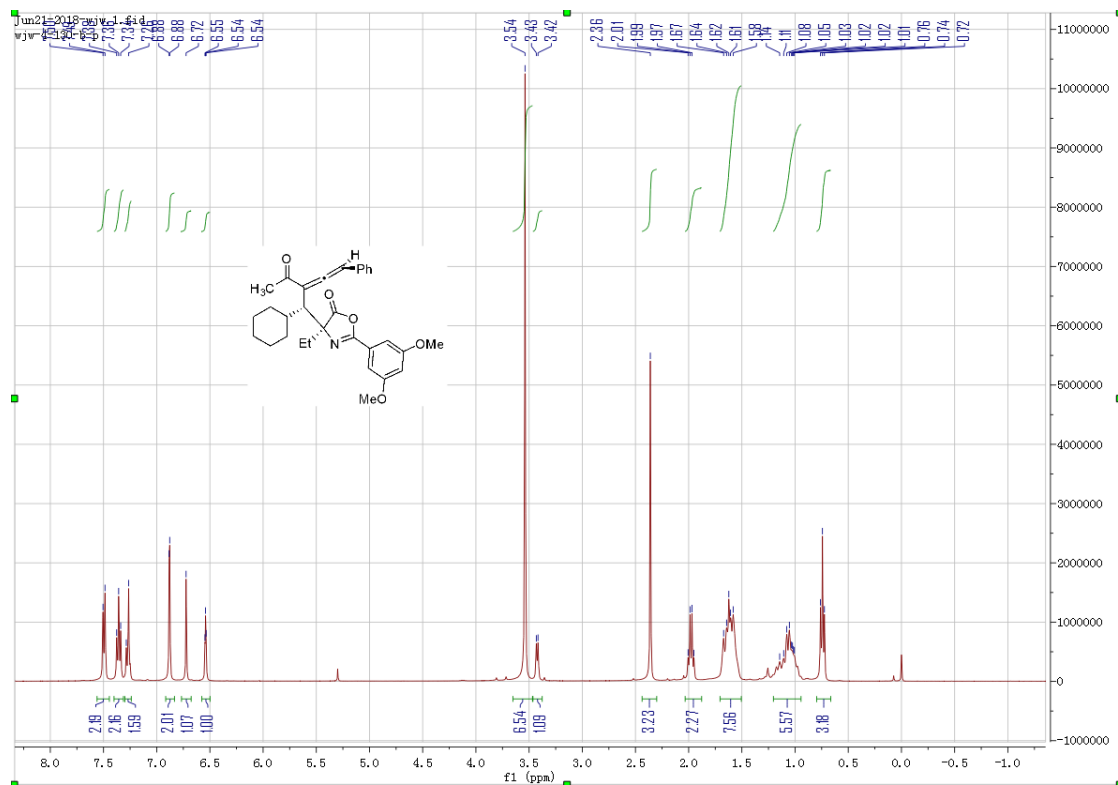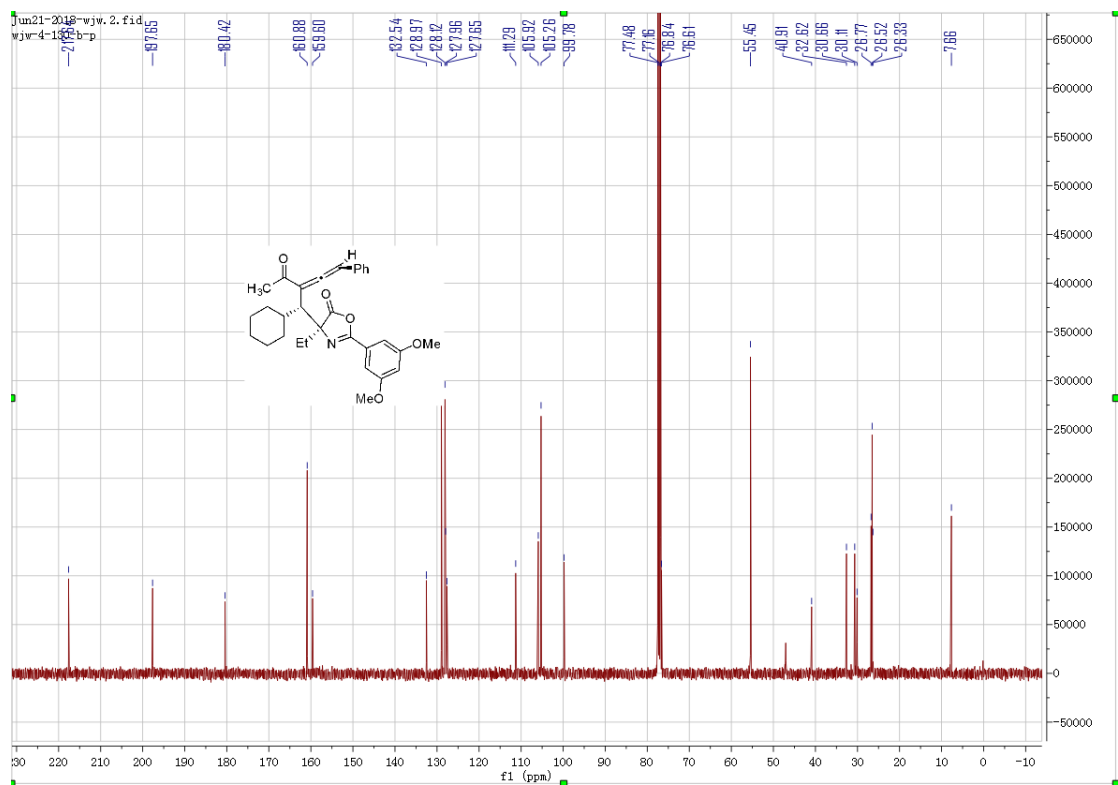



(S)-4-((1*R*,3*S*)-2-acetyl-1,4-diphenylbuta-2,3-dien-1-yl)-4-butyl-2-(3,5-dimethoxyphenyl)oxazol-5(4H)-one (**4v**)

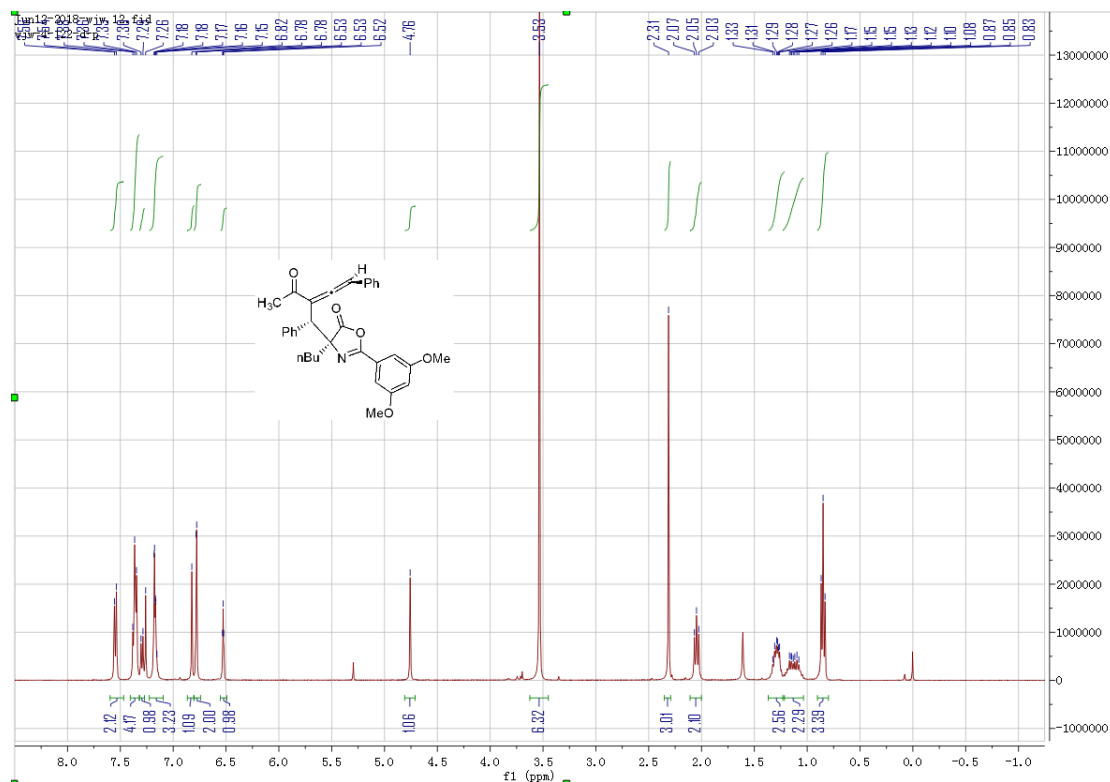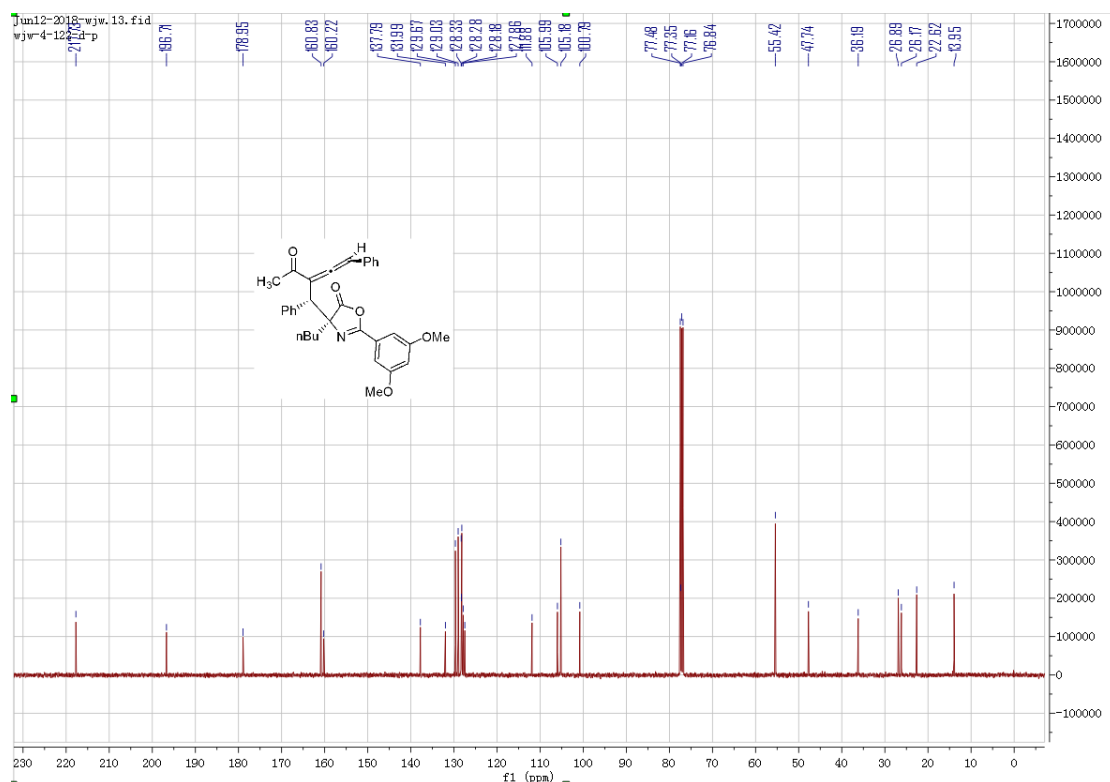

(S)-4-((1*R*,3*S*)-2-acetyl-1,4-diphenylbuta-2,3-dien-1-yl)-4-benzyl-2-(3,5-dimethoxyphenyl)oxazol-5(4H)-one (**4w**)

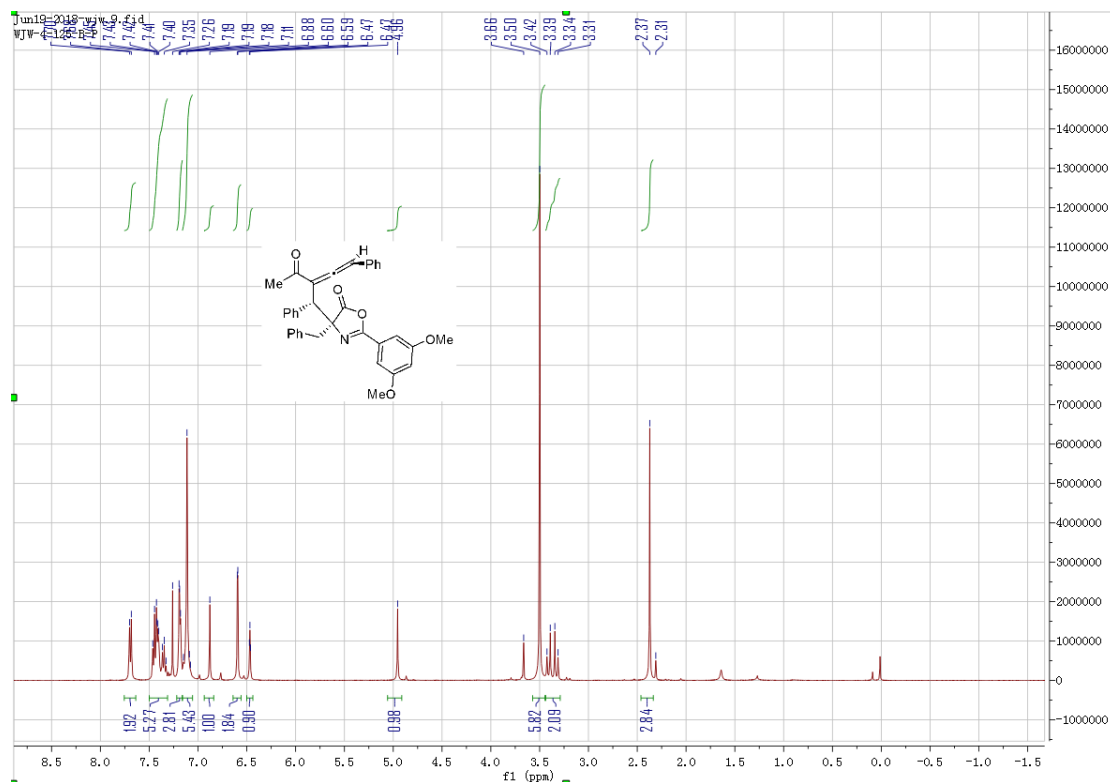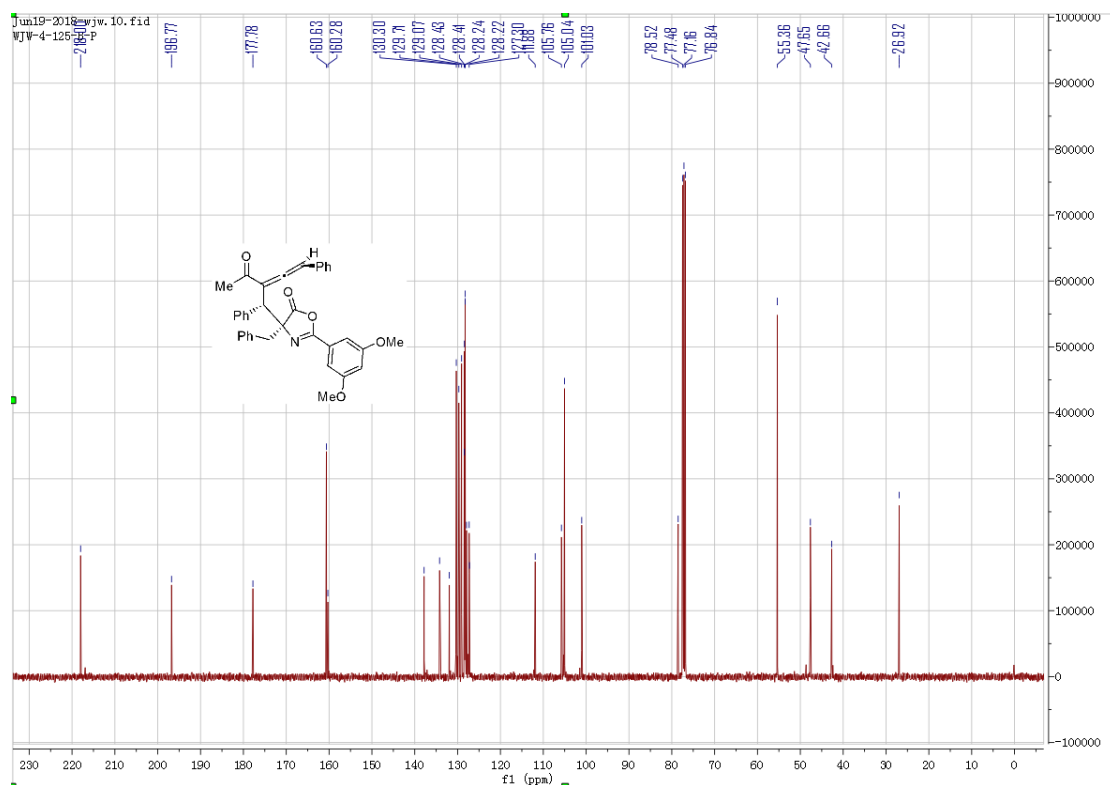

(S)-4-((1*R*,3*S*)-2-acetyl-1,4-diphenylbuta-2,3-dien-1-yl)-2-(3,5-dimethoxyphenyl)-4-(2-(methylthio)ethyl)oxazol-5(4*H*)-one (**4x**)

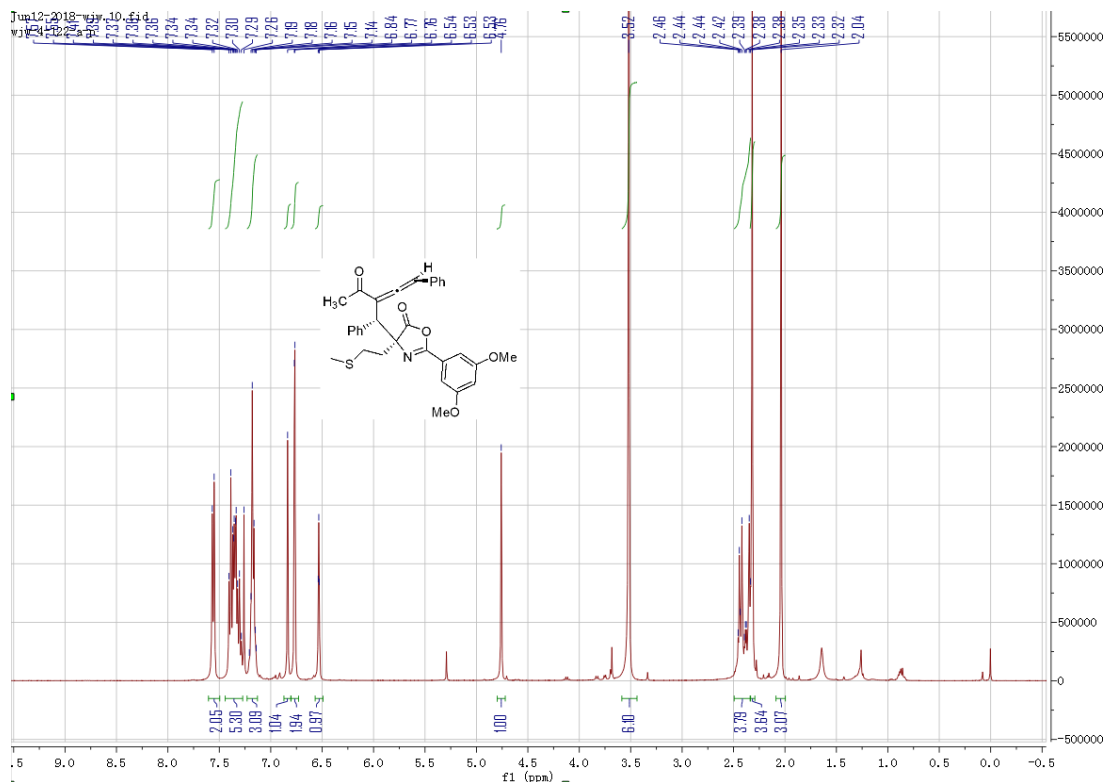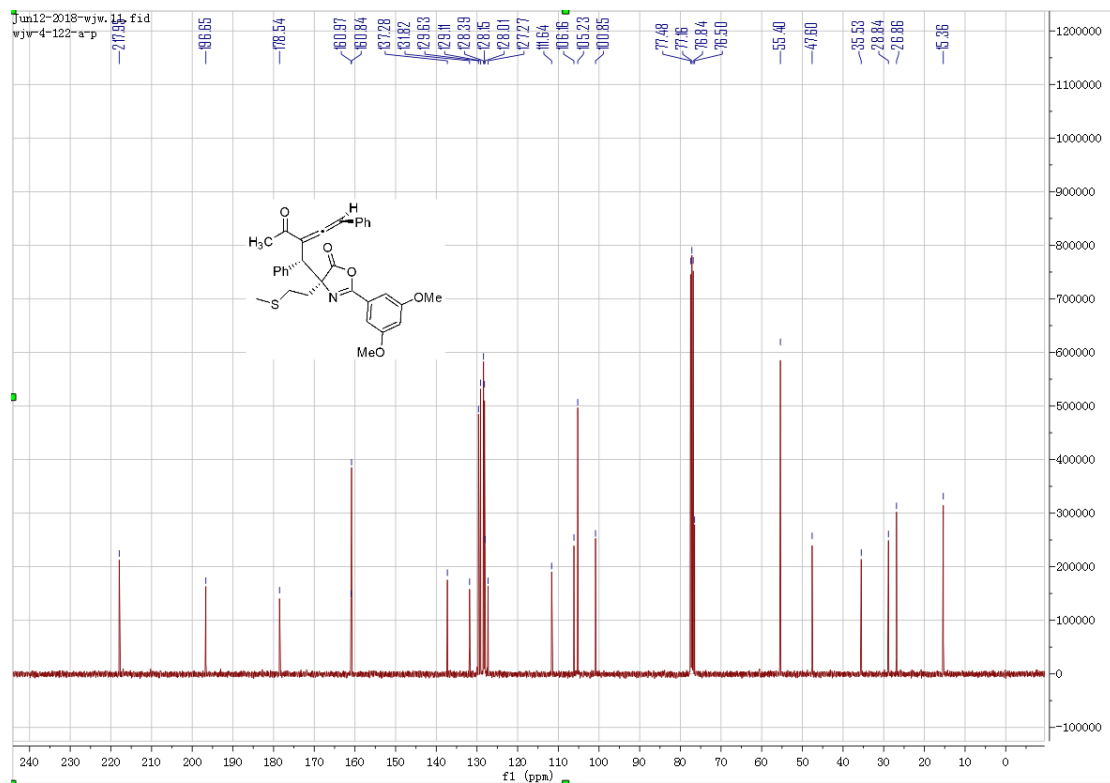

tert-butyl(4-((*S*)-4-((*1*R*,3*S*)-2-acetyl-1,4-diphenylbuta-2,3-dien-1-yl)-2-(3,5-dimethoxyphenyl)-5-oxo-4,5-dihydrooxazol-4-yl)butyl)carbamate (**4y**)*

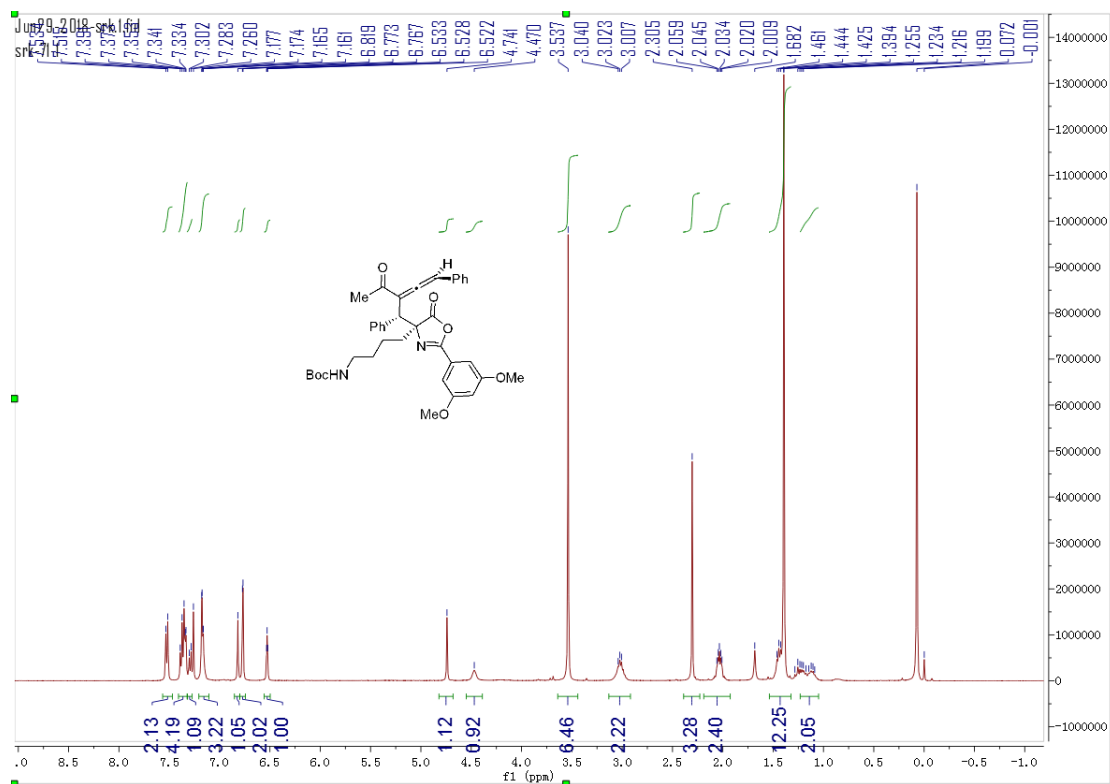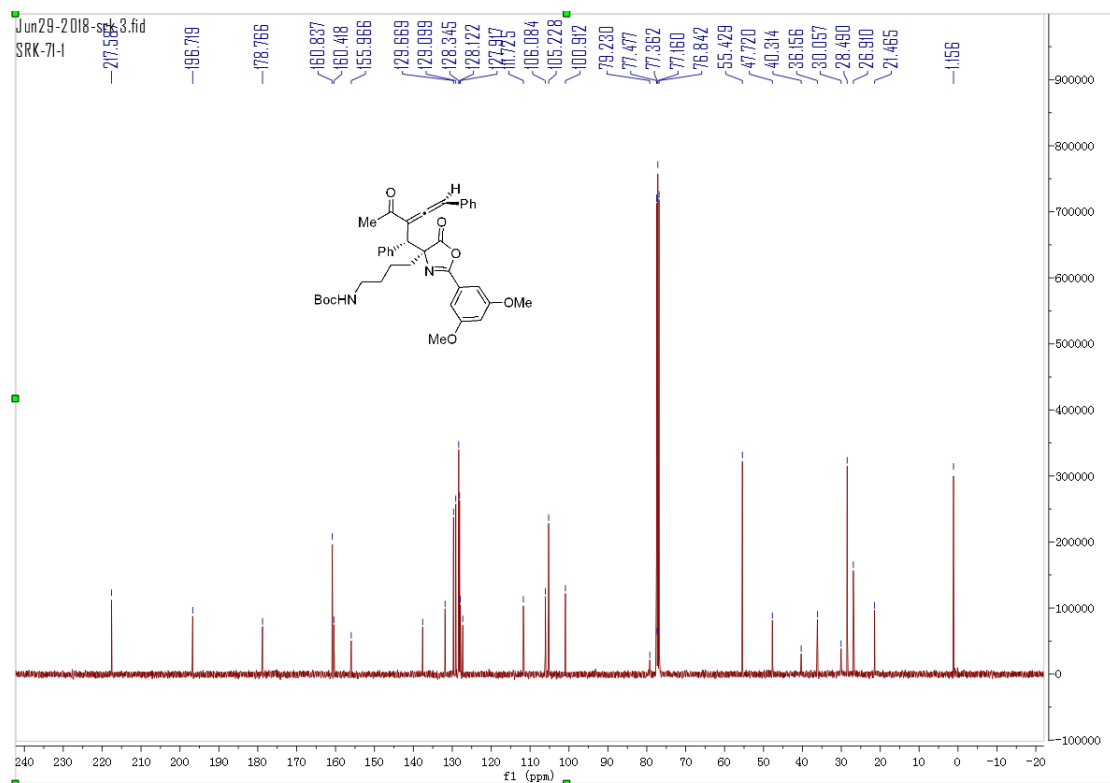

3-benzyl-5-phenylpent-4-yn-2-one (**5a**)

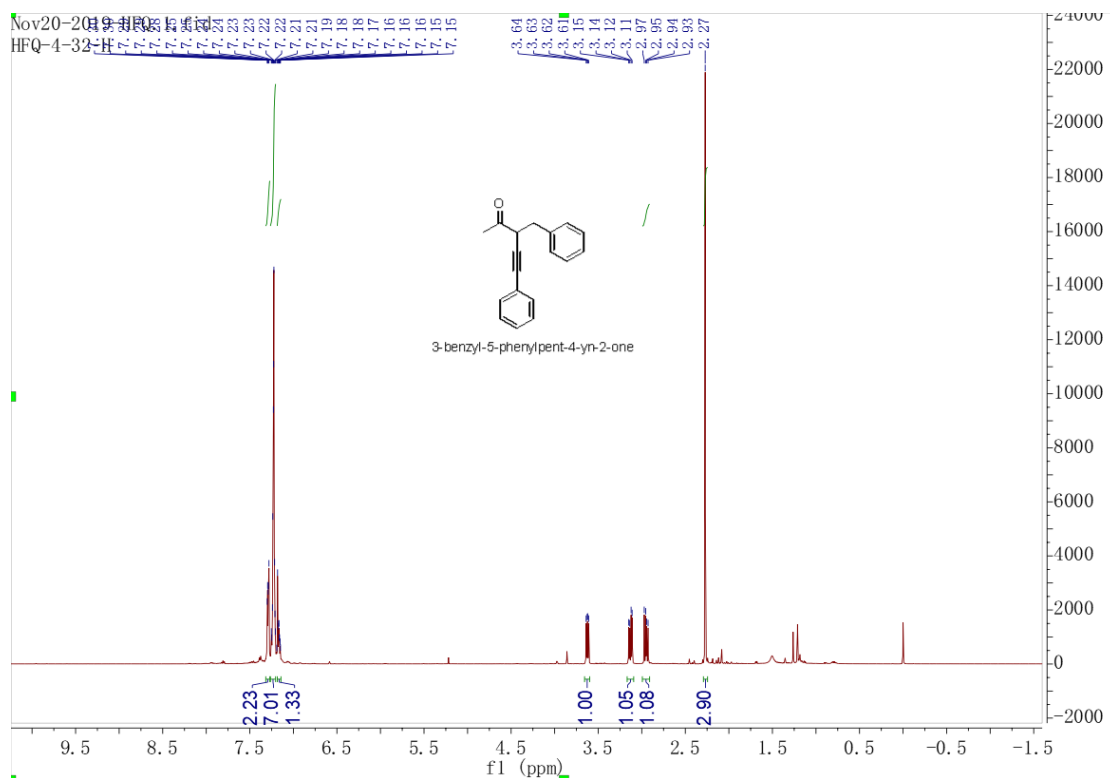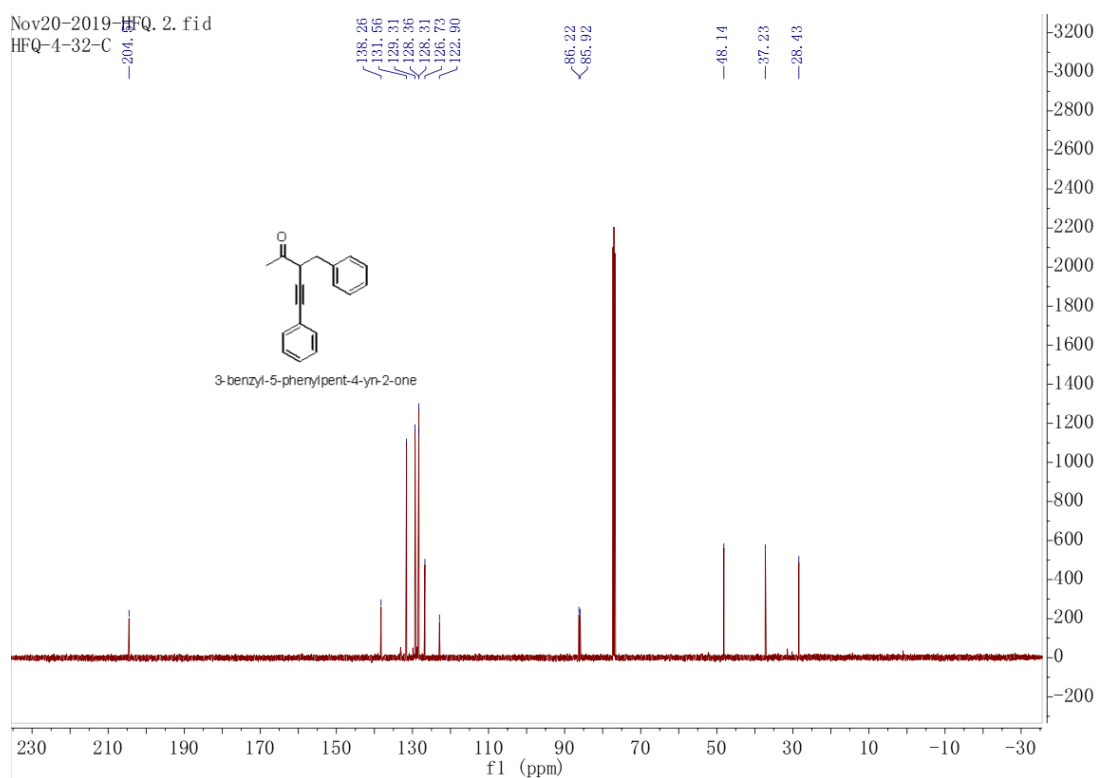

3-benzyl-5-phenylpenta-3,4-dien-2-one (**6a**)

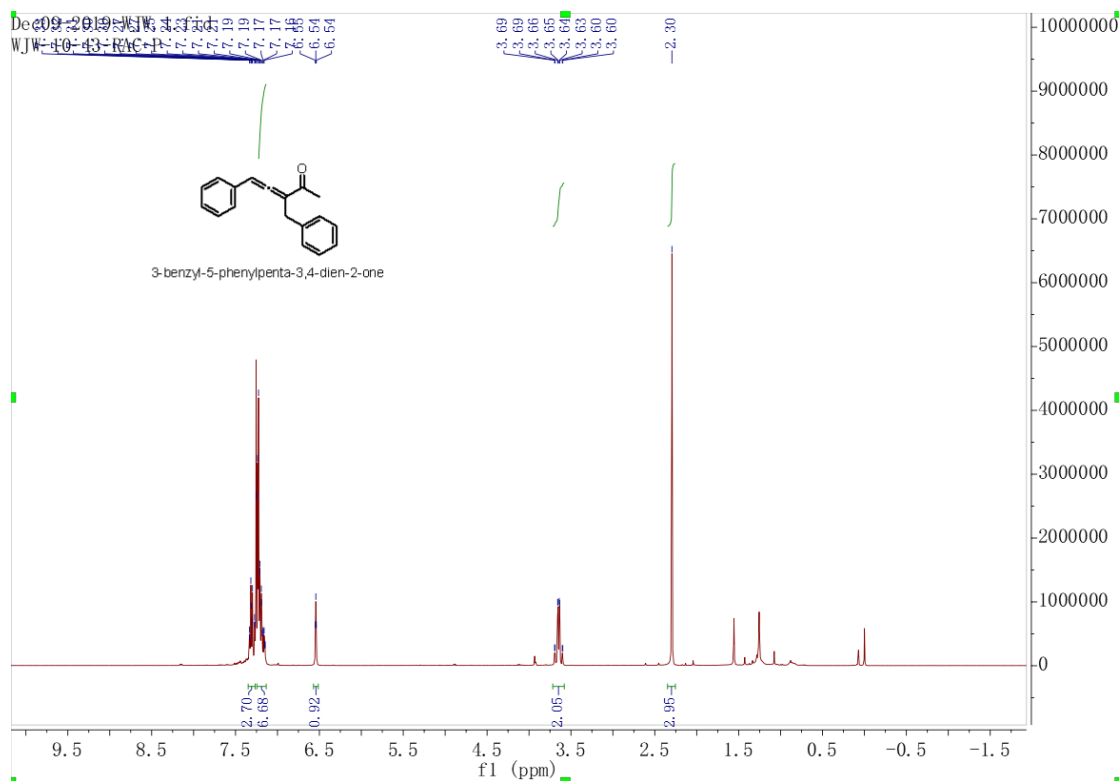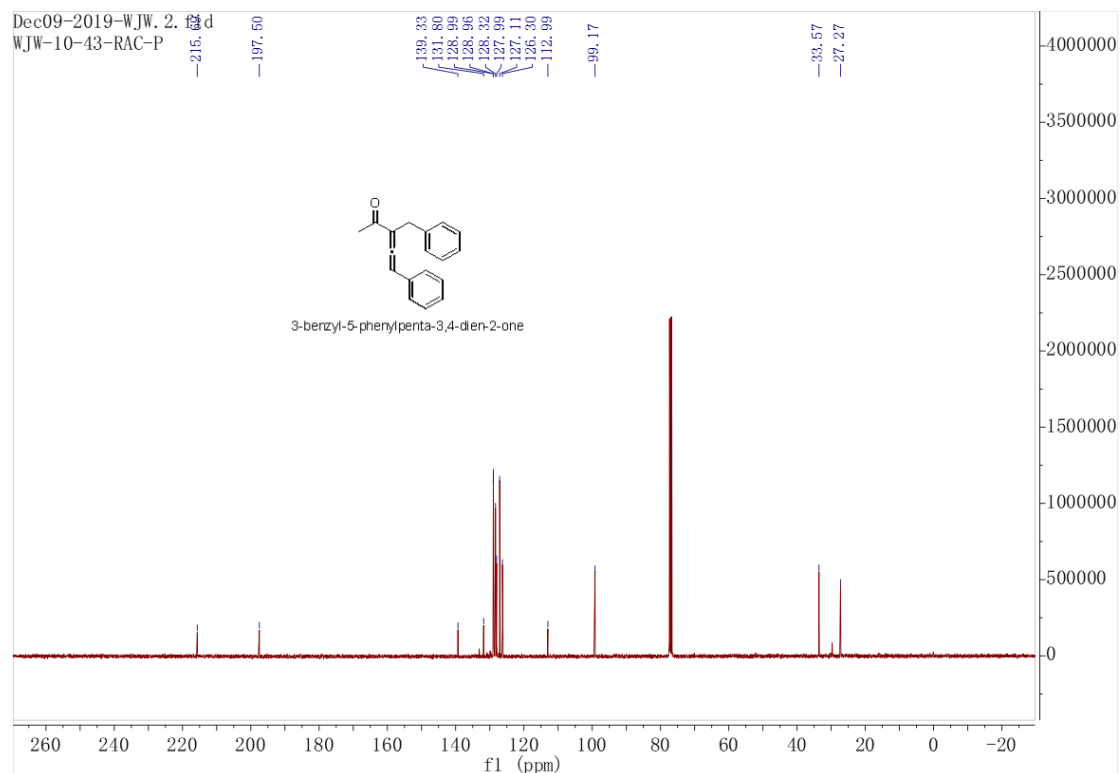

(S)-2-(3,5-dimethoxyphenyl)-4-ethyl-4-((R)-(2-methyl-5-phenylfuran-3-yl)(phenyl)methyl)oxazol-5(4H)-one (**7a**)

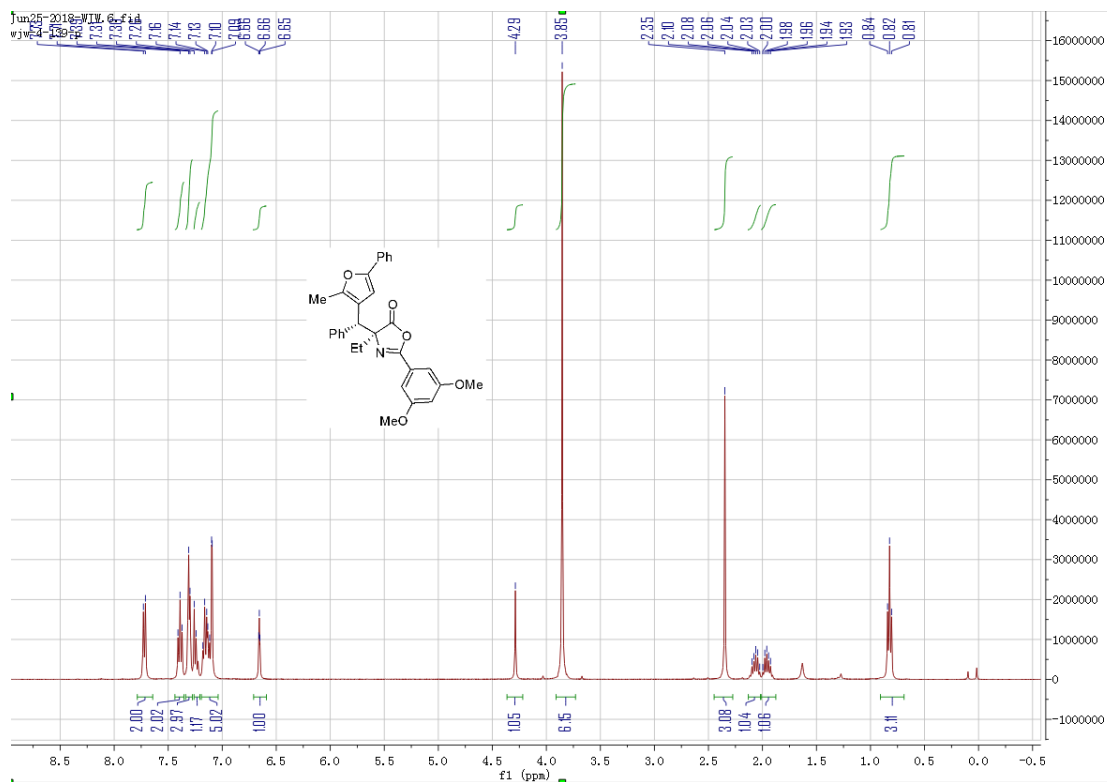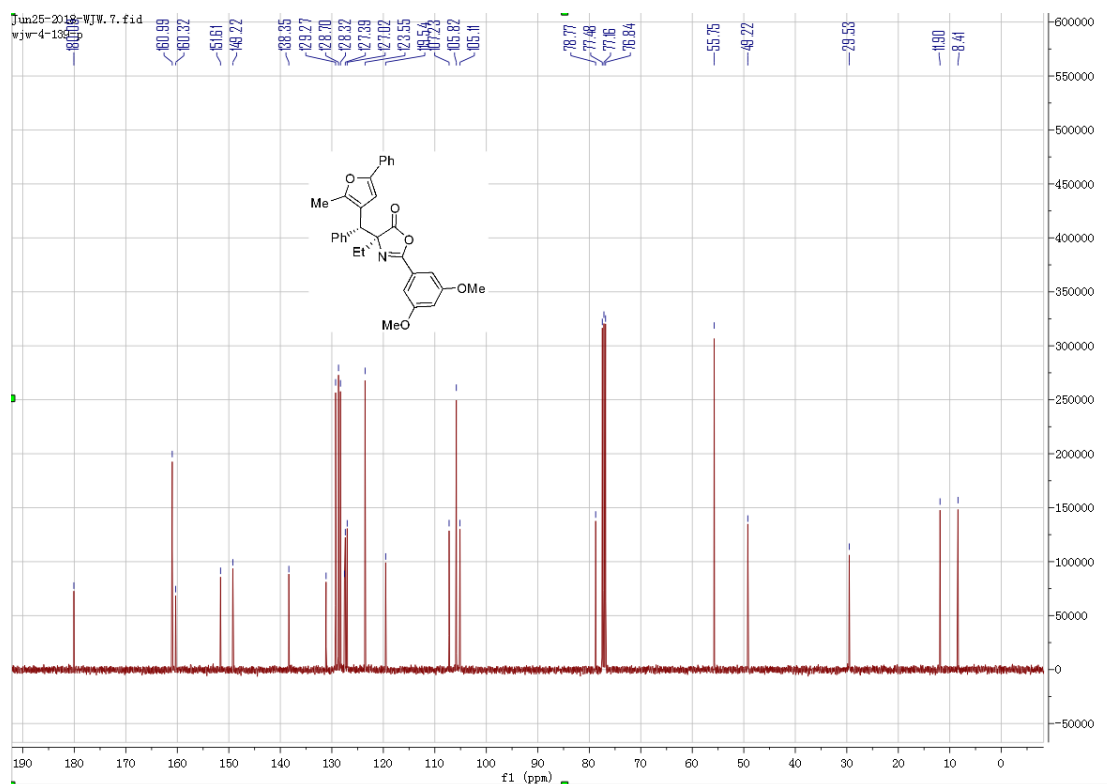

Methyl-(*S*)-2-(3,5-dimethoxybenzamido)-2-((*R*)-(2-methyl-5-phenylfuran-3-yl)(phenyl)methyl)butanoate (**8a**)

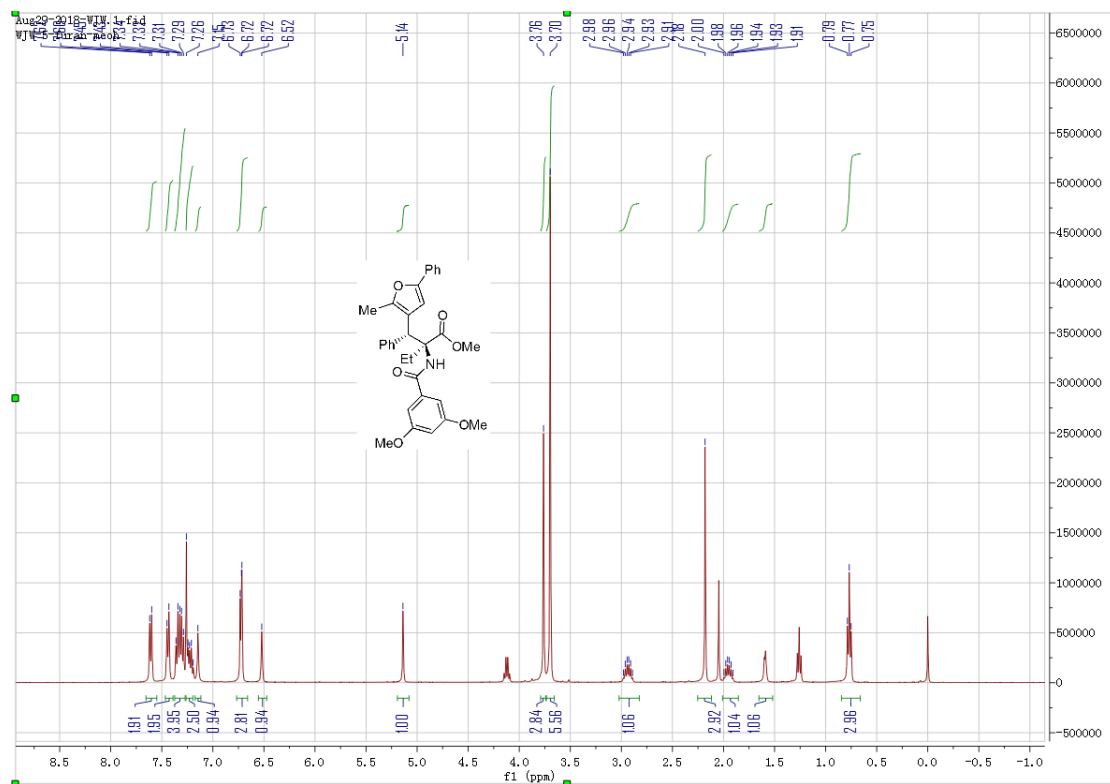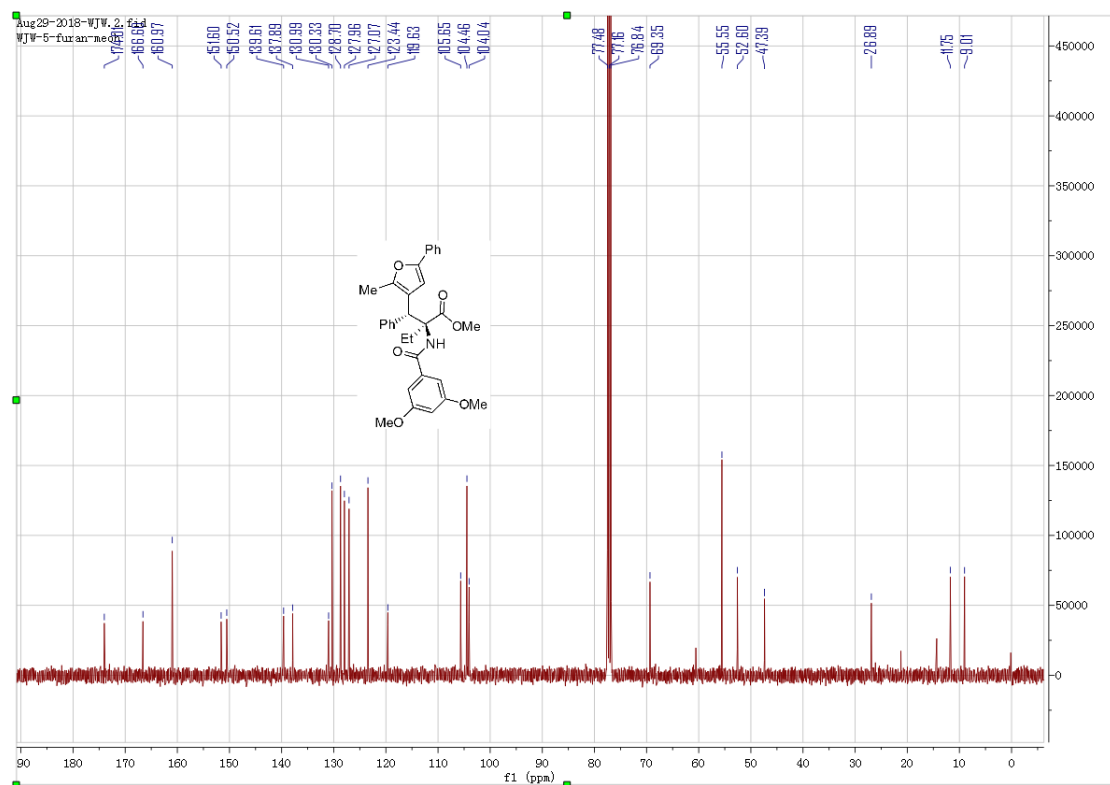



*N*-((3*S*,4*R*,6*R*)-3-ethyl-6-methyl-2-oxo-4-phenyl-5-((*R*)-2-phenylvinylidene)tetrahydro-2*H*-pyran-3-yl)-3,5-dimethoxybenzamide (**9a**)

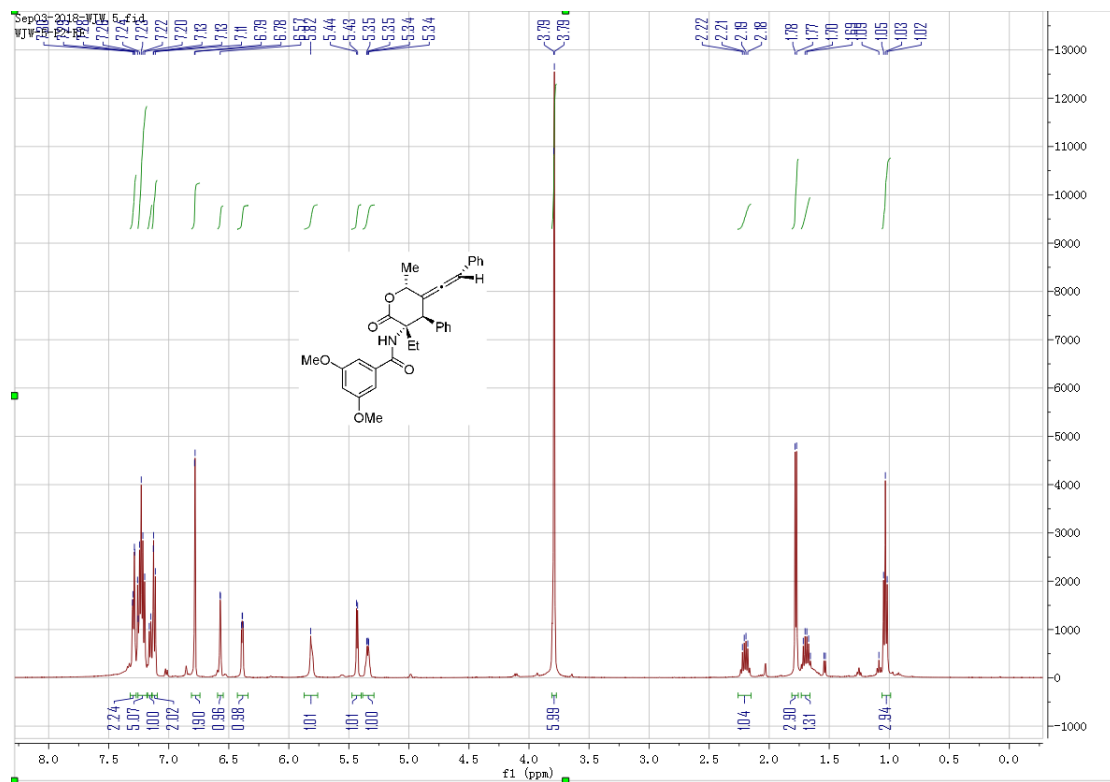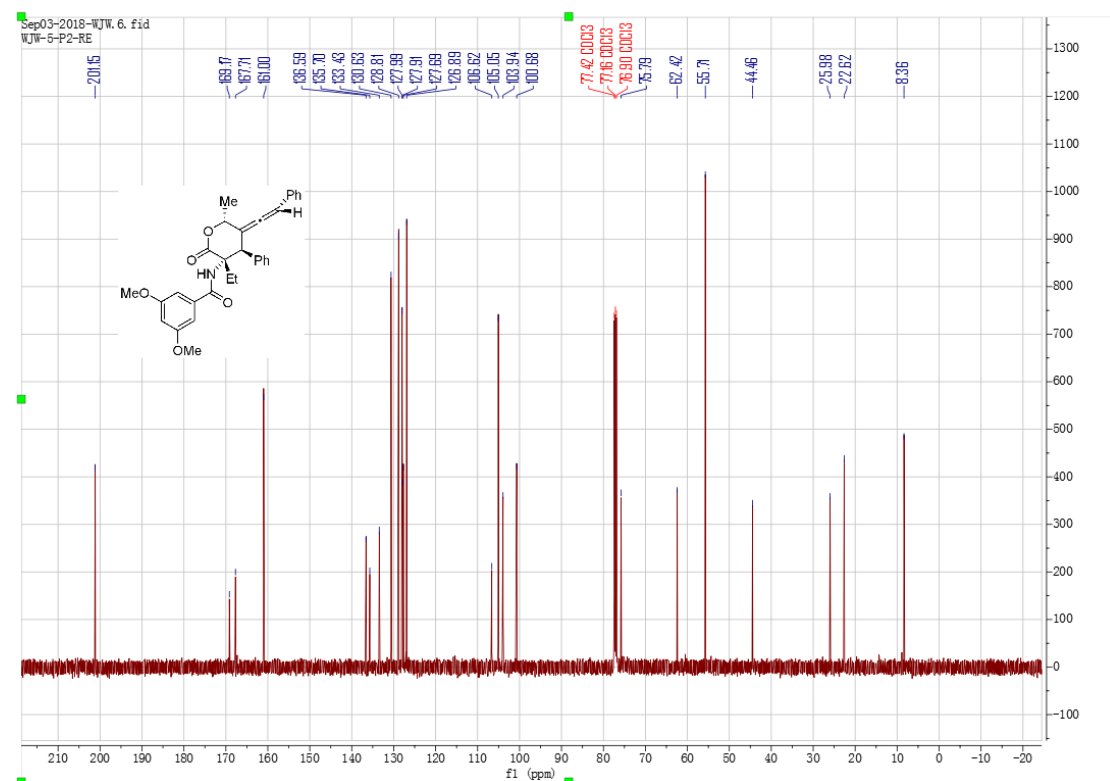

*N*-((3*S*,4*R*,6*R*)-5-((*R*)-1-hydroxyethyl)-4,7-diphenyl-3-(propylcarbamoyl)hepta-5,6-dien-3-yl)-3,5-dimethoxybenzamide (**10a**)

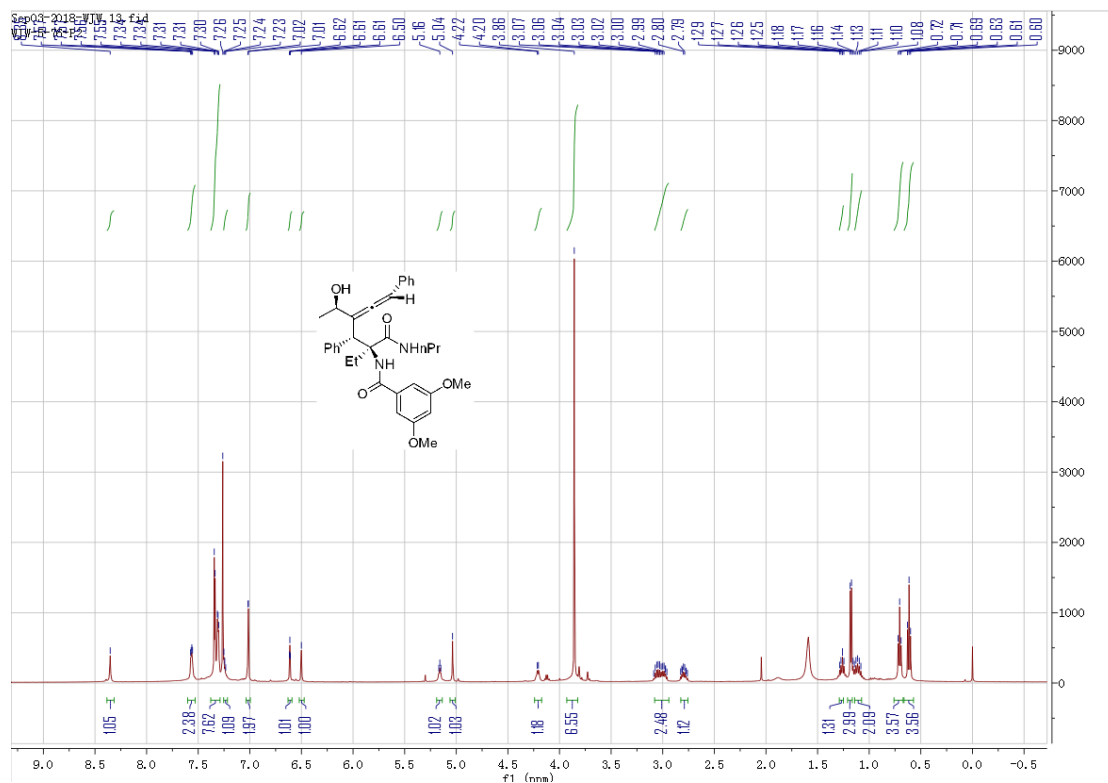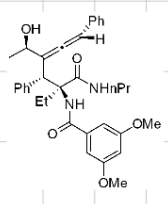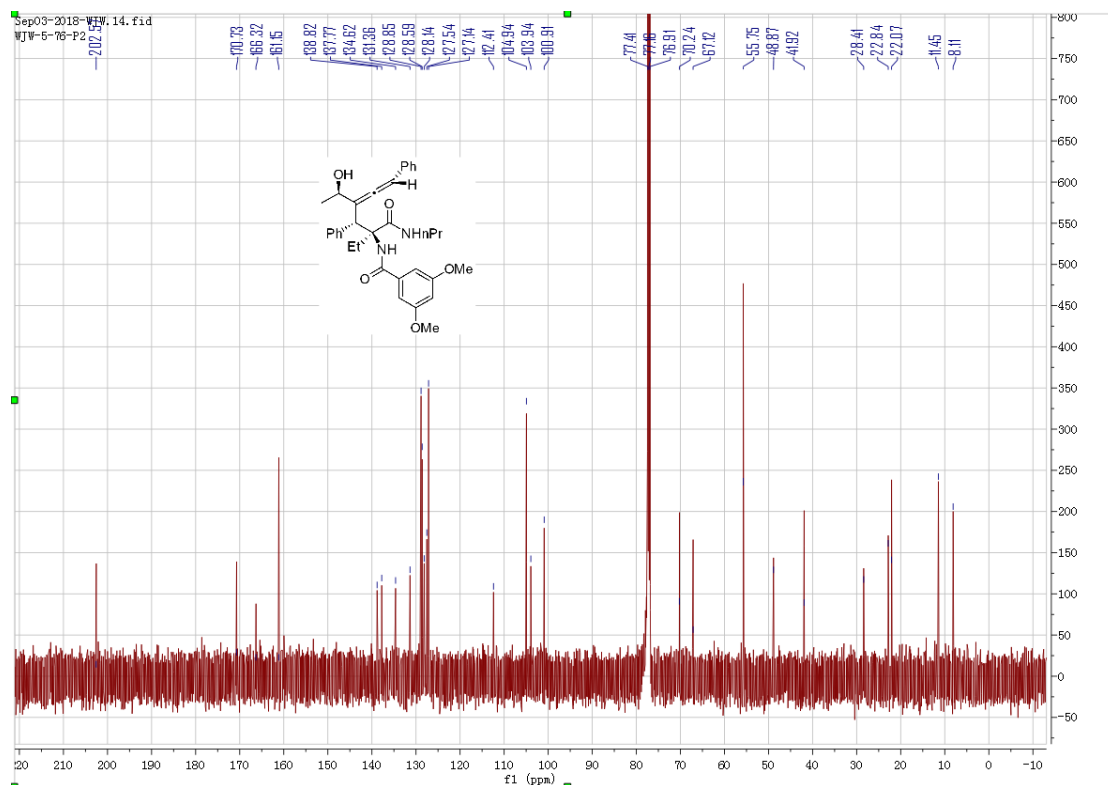

3,5-dimethoxy-*N*-((1*R*,2*S*)-1-((2*R*,5*S*)-2-methyl-5-phenyl-2,5-dihydrofuran-3-yl)-1-phenyl-2-(propylcarbamoyl)butan-2-yl)benzamide (**11a**)

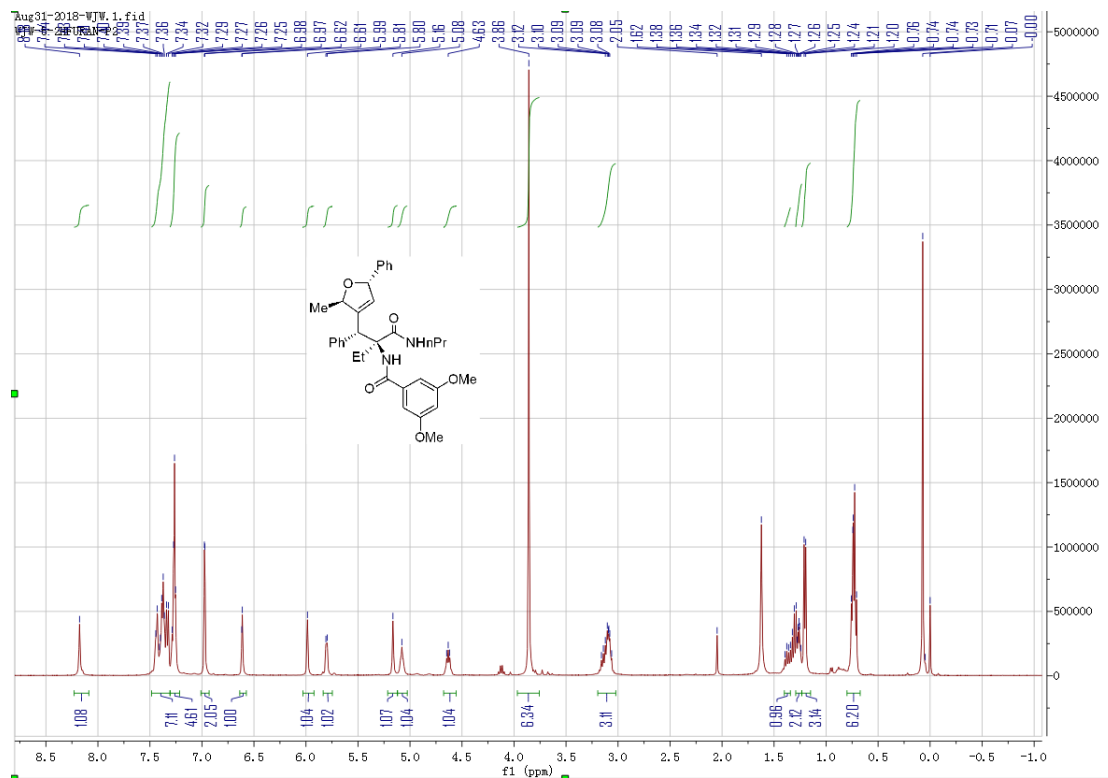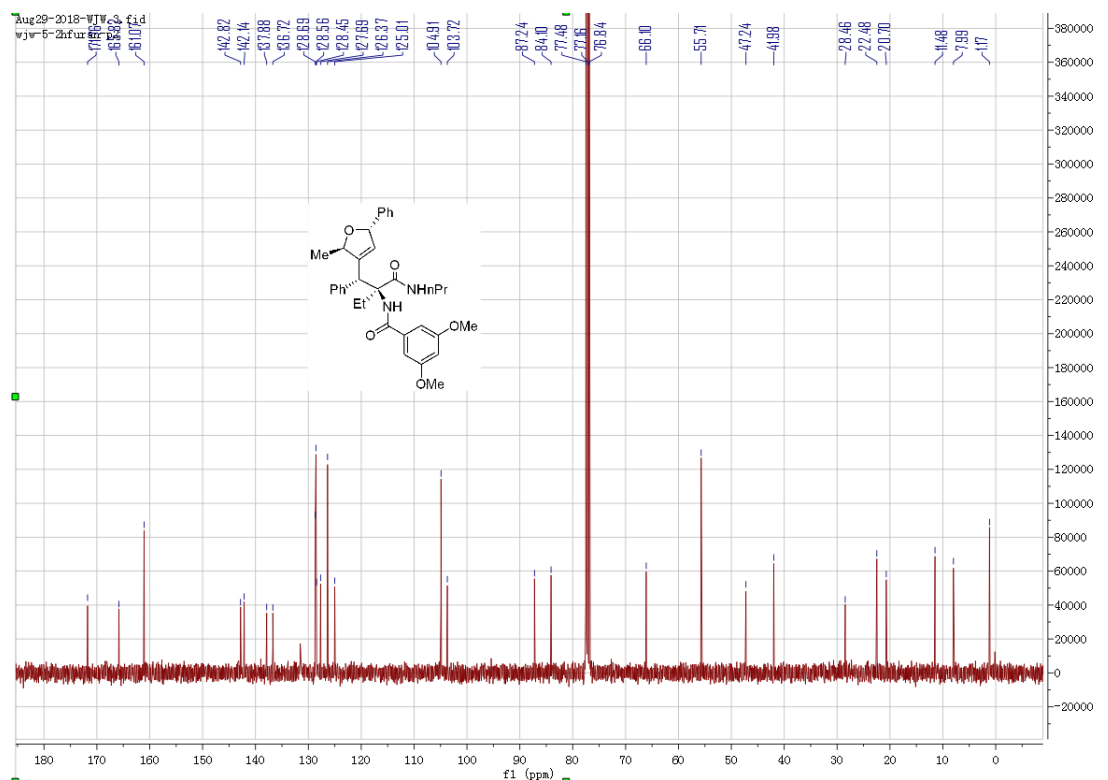

*N*-((1*S*,4*R*,6*R*,10*bR*)-1-ethyl-5-iodo-4-methyl-2-oxo-6-phenyl-1,4,6,10*b*-tetrahydro-2*H*-benzo[*f*]isochro-  
men-1-yl)-3,5-dimethoxybenzamide (**12a**)

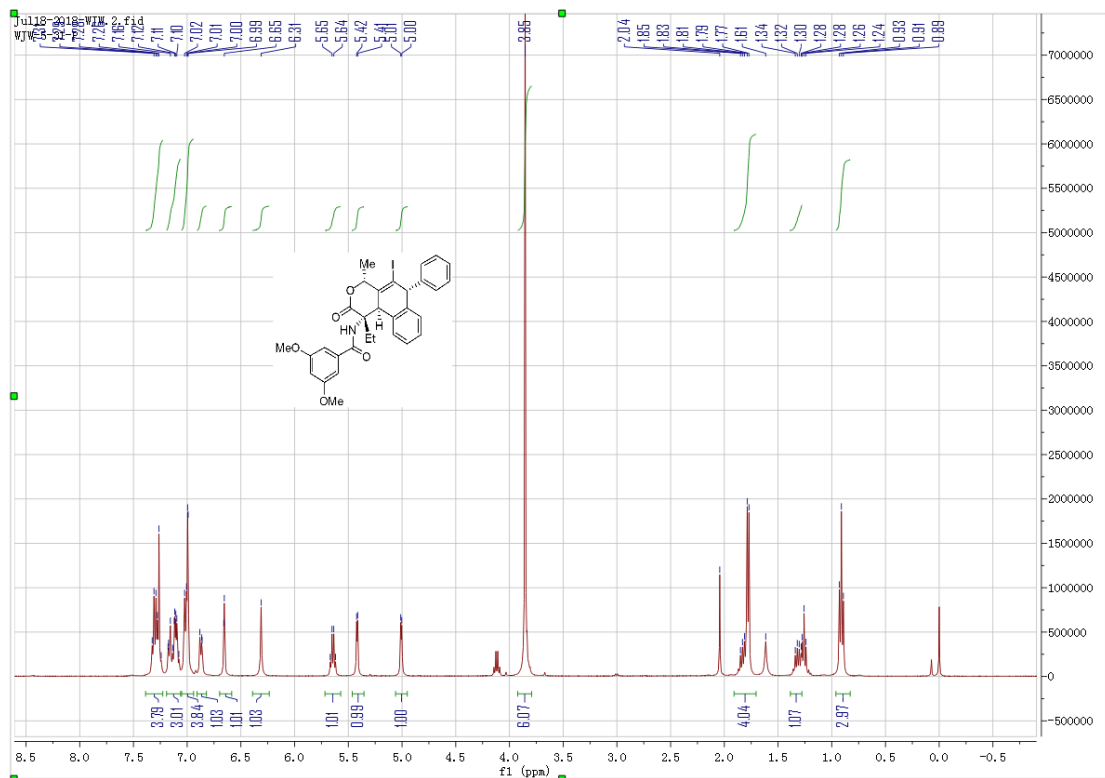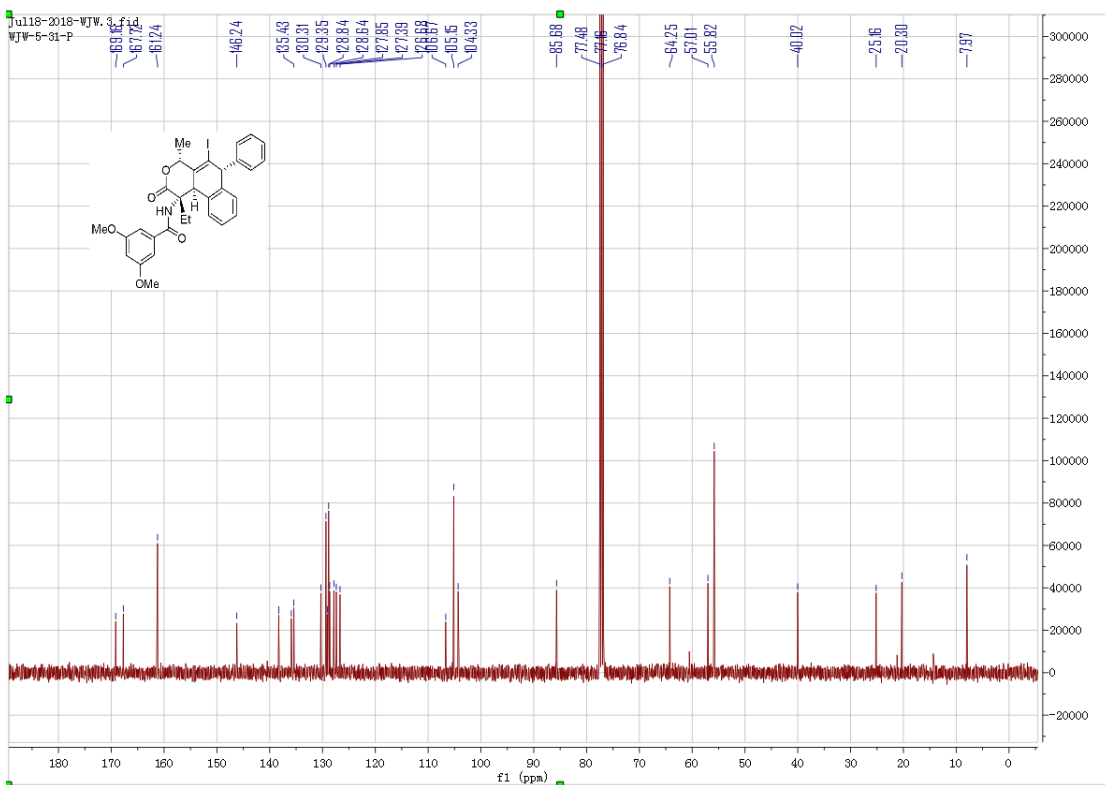

*N*-((3*S*,4*S*,6*S*)-3-ethyl-6-methyl-2-oxo-4-phenyl-5-((*S*)-2-phenylvinylidene)tetrahydro-2*H*-pyran-3-yl)-3,5-dimethoxybenzamide (**13a**)

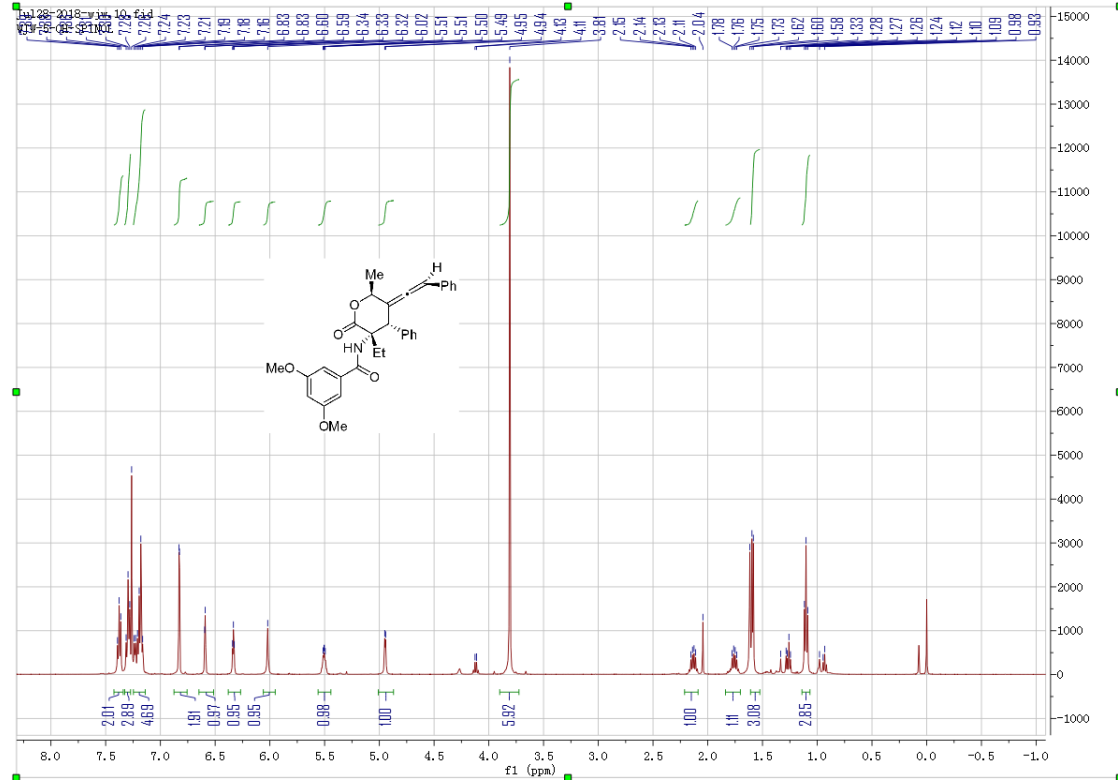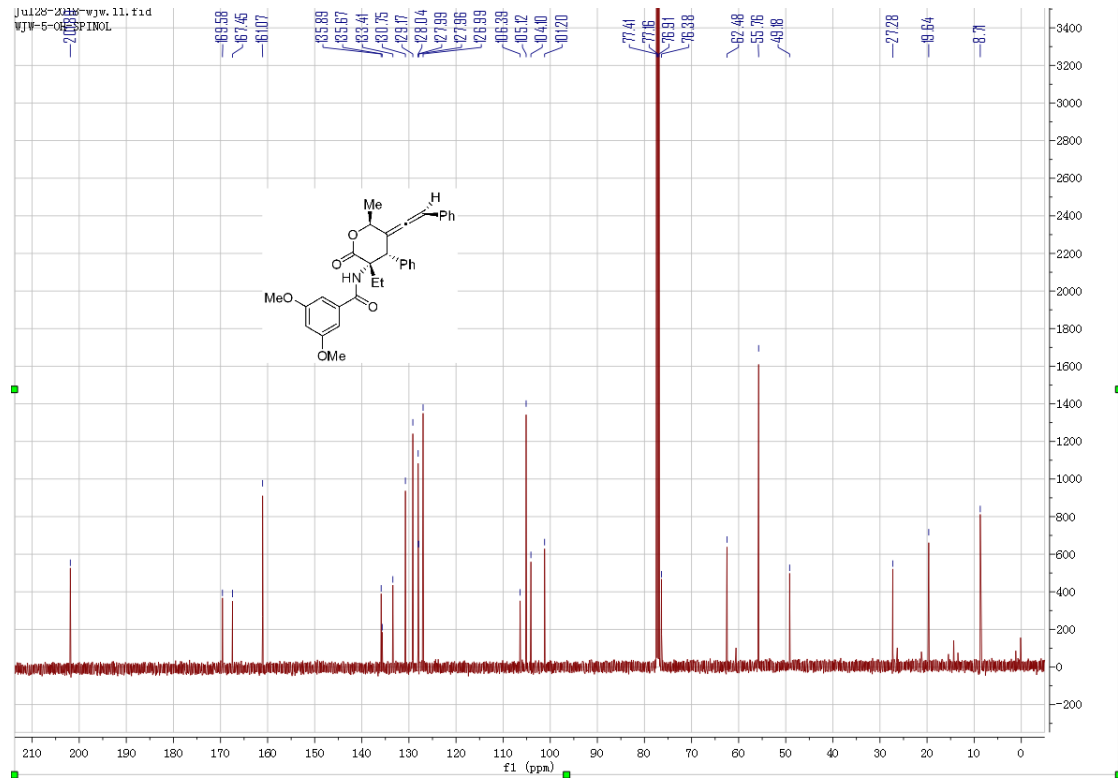

*N*-((3*S*,4*R*,6*S*)-5-((*S*)-1-hydroxyethyl)-4,7-diphenyl-3-(propylcarbamoyl)hepta-5,6-dien-3-yl)-3,5-dimethoxybenzamide (**14a**)

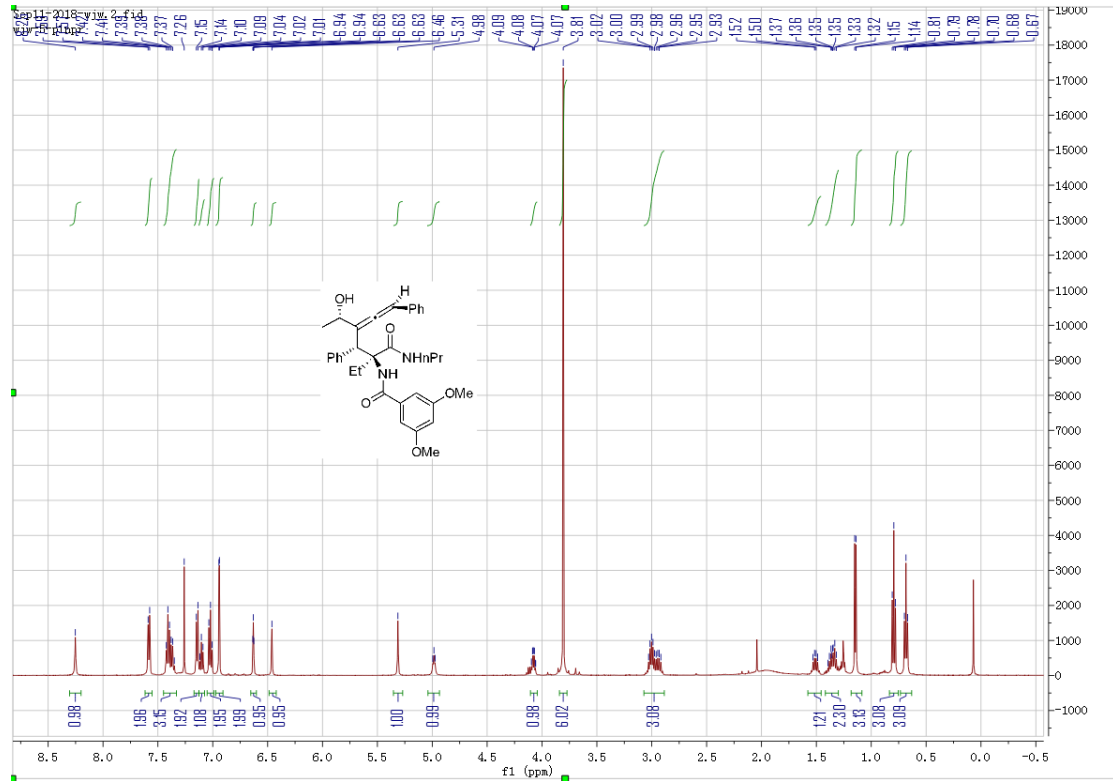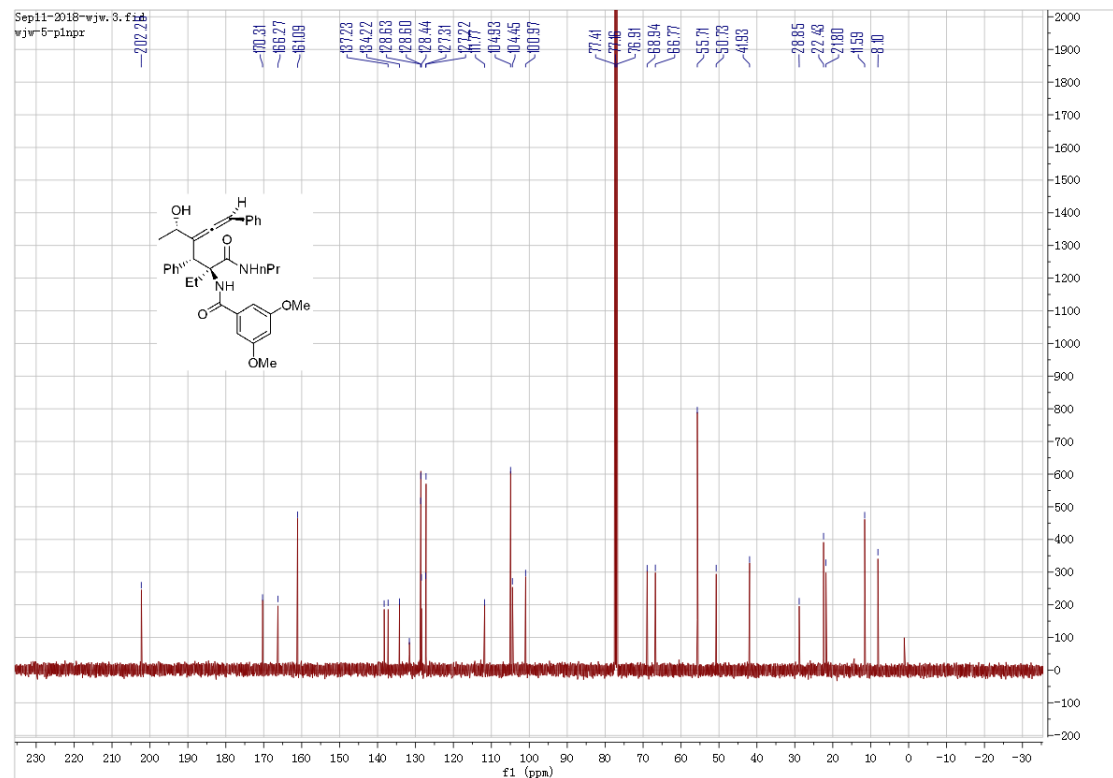

3,5-dimethoxy-*N*-((1*R*,2*S*)-1-((2*S*,5*R*)-2-methyl-5-phenyl-2,5-dihydrofuran-3-yl)-1-phenyl-2-(propylcarbamoyl)butan-2-yl)benzamide (**15a**)

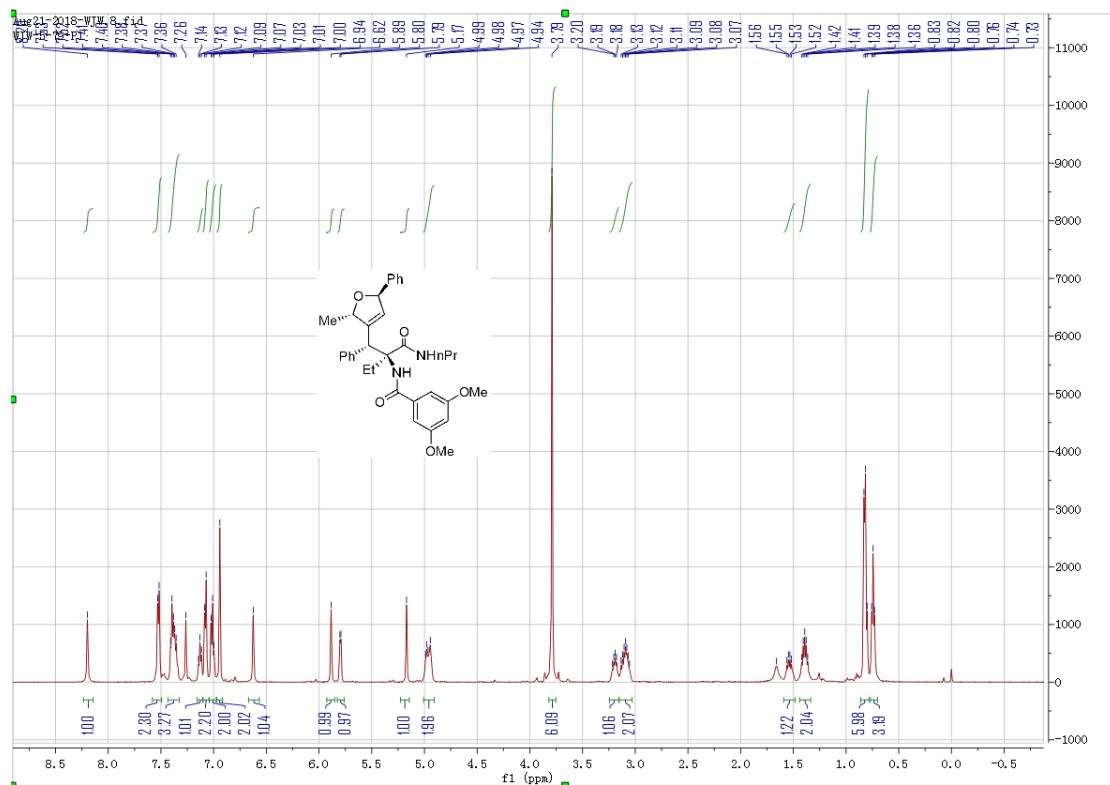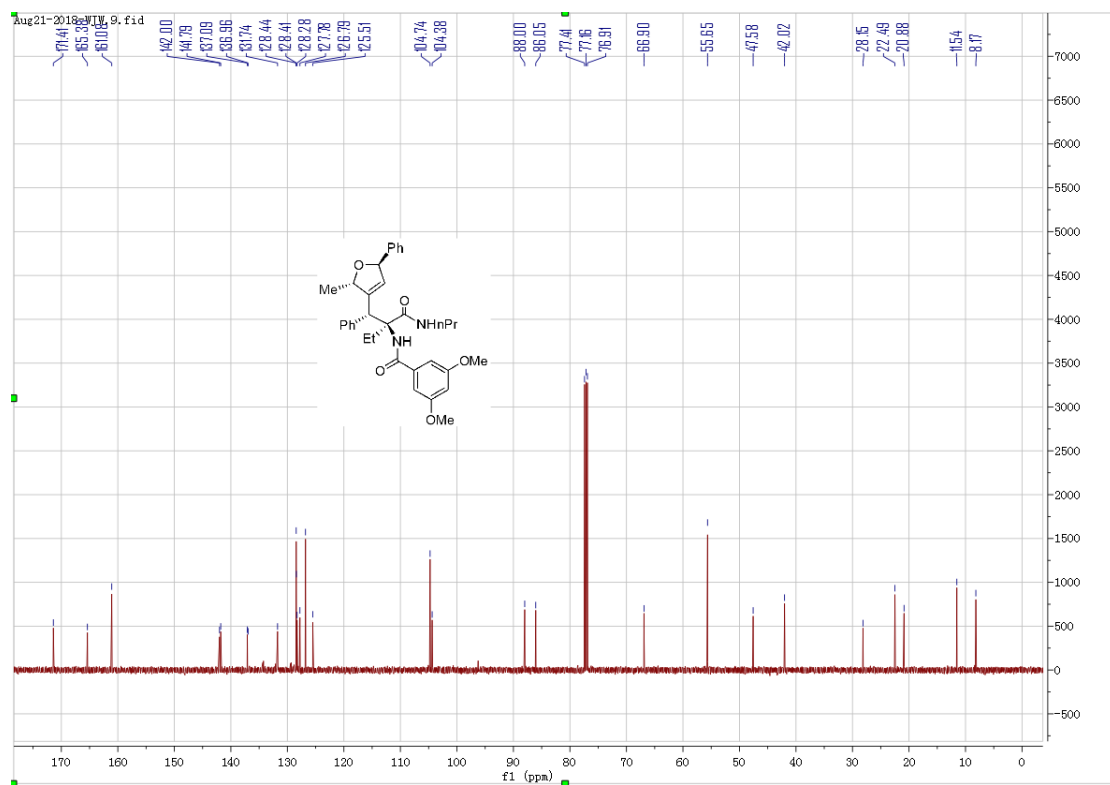

(1*R*,5*S*,8*S*,9*S*)-3-(3,5-dimethoxyphenyl)-5-ethyl-1-((*Z*)-1-iodo-2-phenylvinyl)-8-methyl-9-phenyl-2,7-dioxo-4-azabicyclo[3.3.1]non-3-en-6-one (**16a**)

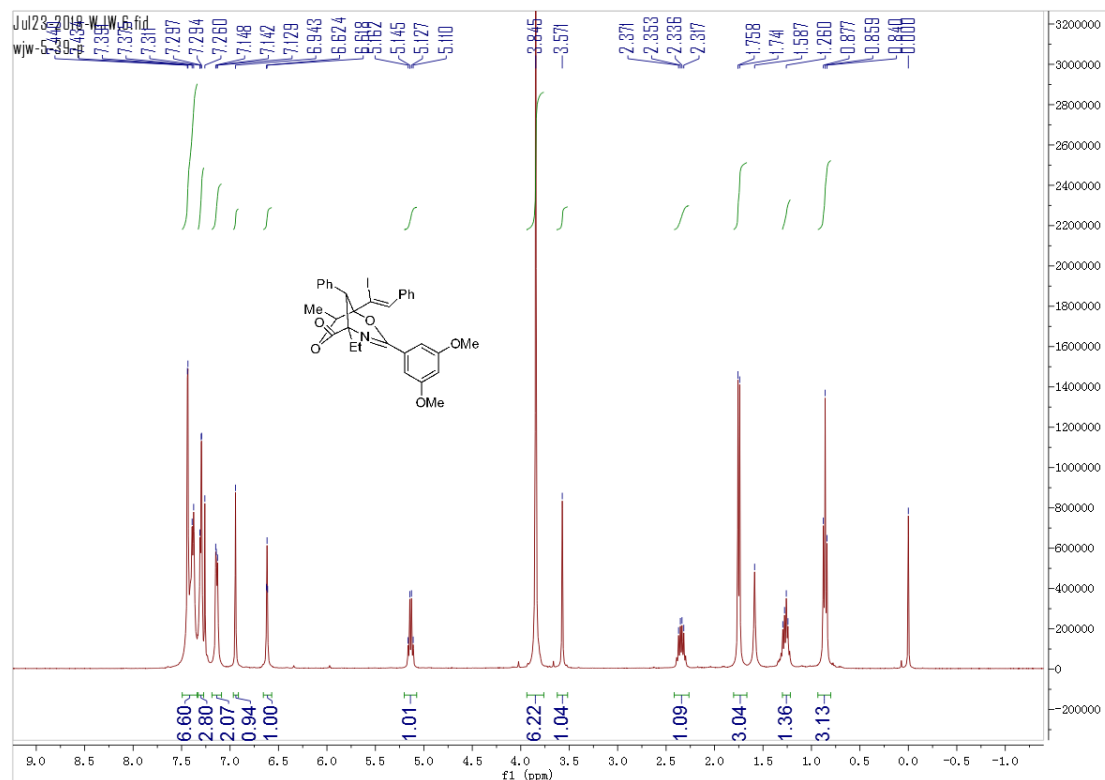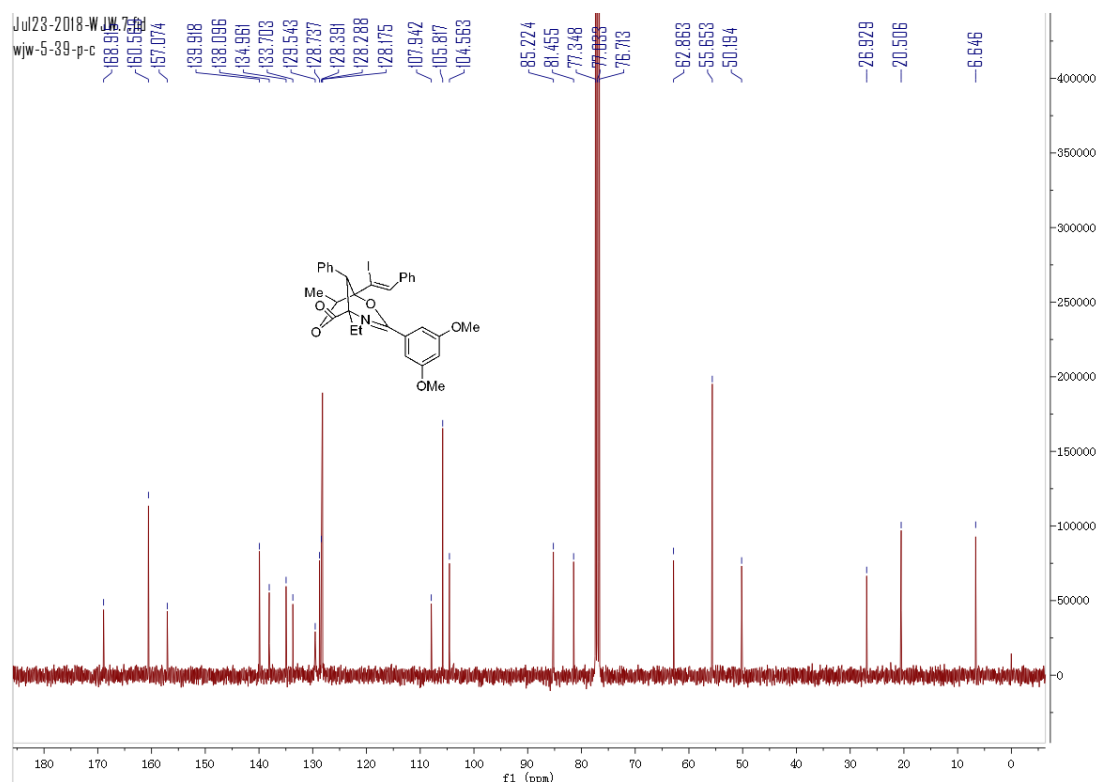



## Supplementary References

- 1 Kashikura, W., Itoh, J., Mori, K. & Akiyama, T. Enantioselective Friedel–Crafts Alkylation of Indoles, Pyrroles, and Furans with Trifluoropyruvate Catalyzed by Chiral Phosphoric Acid. *Chem. Asian J.* **5**, 470-472 (2010).
- 2 Wang, T. & Zhang, J. Chemoselective C C Bond Cleavage of Epoxide Motifs: Gold(I)-Catalyzed Diastereoselective [4+3] Cycloadditions of 1-(1-Alkynyl)oxiranyl Ketones and Nitrones. *Chem. Eur. J.* **17**, 86-90 (2011).
- 3 Poulsen, P. H. *et al.* Organocatalytic Formation of Chiral Trisubstituted Allenes and Chiral Furan Derivatives. *Angew. Chem. Int. Ed.* **57**, 10661-10665 (2018).
- 4 Pathipati, S. R., van der Werf, A., Eriksson, L. & Selander, N. Diastereoselective Synthesis of Cyclopenta[c]furans by a Catalytic Multicomponent Reaction. *Angew. Chem. Int. Ed.* **55**, 11863-11866 (2016).
- 5 Du, Q., Neudörfl, J.-M. & Schmalz, H.-G. Chiral Phosphine–Phosphite Ligands in Asymmetric Gold Catalysis: Highly Enantioselective Synthesis of Furo[3,4-d]-Tetrahydropyridazine Derivatives through [3+3]-Cycloaddition. *Chem. Eur. J.* **24**, 2379-2383 (2018).
- 6 Wang, Z. *et al.* Enantioselective synthesis of chiral 4H-pyran derivatives through [3+3] tandem reaction over a squaramide catalyst. *Tetrahedron: Asymmetry* **28**, 1708-1716 (2017).
- 7 Hu, J., Liu, L., Yang, S. & Liang, Y.-M. Phase-transfer-catalyzed cyclization reaction of nucleophilic addition to electron-deficient 1,3-conjugated enynes for the synthesis of functionalized 4H-pyrans. *Org. Bio. Chem.* **9**, 3375-3379 (2011).
- 8 Zhang, H. *et al.* Catalytic Asymmetric Epoxidation of Electron-Deficient Enynes Promoted by Chiral N,N'-Dioxide-Scandium(III) Complex. *Adv. Synth. Catal.* **359**, 3454-3459 (2017).
- 9 Yao, T., Zhang, X. & Larock, R. C. AuCl<sub>3</sub>-Catalyzed Synthesis of Highly Substituted Furans from 2-(1-Alkynyl)-2-alken-1-ones. *J. Am. Chem. Soc.* **126**, 11164-11165 (2004).
- 10 de Mello, A. C., Momo, P. B., Burtoloso, A. C. B. & Amarante, G. W. Metal-Free Insertion Reactions of Diazo Carbonyls to Azlactones. *J. Org. Chem.* **83**, 11399-11406 (2018).
- 11 M. J. Frisch, G. W. Trucks, H. B. Schlegel, G. E. Scuseria, M. A. Robb, J. R. Cheeseman, G. Scalmani, V. Barone, B. Mennucci, G. A. Petersson, H. Nakatsuji, M. Caricato, X. Li, H. P. Hratchian, A. F. Izmaylov, J. Bloino, G. Zheng, J. L. Sonnenberg, M. Hada, M. Ehara, K. Toyota, R. Fukuda, J. Hasegawa, M. Ishida, T. Nakajima, Y. Honda, O. Kitao, H. Nakai, T. Vreven, Jr., J. A. Montgomery, J. E. Peralta, F. Ogliaro, M. Bearpark, J. J. Heyd, E. Brothers, K. N. Kudin, V. N. Staroverov, T. Keith, R. Kobayashi, J. Normand, K. Raghavachari, A. Rendell, J. C. Burant, S. S. Iyengar, J. Tomasi, M. Cossi, N. Rega, J. M. Millam, M. Klene, J. E. Knox, J. B. Cross, V. Bakken, C. Adamo, J. Jaramillo, R. Gomperts, R. E. Stratmann, O. Yazyev, A. J. Austin, R. Cammi, C. Pomelli, J. W. Ochterski, R. L. Martin, K. Morokuma, V. G. Zakrzewski, G. A. Voth, P. Salvador, J. J. Dannenberg, S. Dapprich, A. D. Daniels, O. Farkas, J. B. Foresman, J. V. Ortiz, J. Cioslowski, D. J. Fox, Gaussian 09, Rev. D.01; Gaussian, Inc., Wallingford CT, **2013**.
- 12 Schwabe, T. & Grimme, S. Double-hybrid density functionals with long-range dispersion corrections: higher accuracy and extended applicability. *Phys. Chem. Chem. Phys.* **9**, 3397-3406 (2007).
- 13 Schwabe, T. & Grimme, S. Theoretical Thermodynamics for Large Molecules: Walking the Thin Line between Accuracy and Computational Cost. *Acc. Chem. Res.* **41**, 569-579 (2008).

- 14 Marenich, A. V., Cramer, C. J. & Truhlar, D. G. Universal Solvation Model Based on Solute Electron Density and on a Continuum Model of the Solvent Defined by the Bulk Dielectric Constant and Atomic Surface Tensions. *J. Phys. Chem. B* **113**, 6378-6396 (2009).
- 15 Hratchian, H. P. & Schlegel, H. B. Accurate reaction paths using a Hessian based predictor–corrector integrator. *J. Chem. Phys.* **120**, 9918-9924 (2004).
- 16 Hratchian, H. P. & Schlegel, H. B. Using Hessian Updating To Increase the Efficiency of a Hessian Based Predictor-Corrector Reaction Path Following Method. *J. Chem. Theory Comput.* **1**, 61-69 (2005).
- 17 Peng, Q., Duarte, F. & Paton, R. S. Computing organic stereoselectivity – from concepts to quantitative calculations and predictions. *Chem. Soc. Rev.* **45**, 6093-6107 (2016).
- 18 Mitoraj, M. & Michalak, A. Donor–Acceptor Properties of Ligands from the Natural Orbitals for Chemical Valence. *Organometallics* **26**, 6576-6580 (2007).
- 19 Mitoraj, M. P., Michalak, A. & Ziegler, T. A Combined Charge and Energy Decomposition Scheme for Bond Analysis. *J. Chem. Theory Comput.* **5**, 962-975 (2009).
- 20 SCM, ADF2019, Theoretical Chemistry, Vrije Universiteit, Amsterdam, Netherlands, <http://www.scm.com>.
- 21 te Velde, G. *et al.* Chemistry with ADF. *J. Comput. Chem.* **22**, 931-967 (2001).
- 22 Van Lenthe, E. & Baerends, E. J. Optimized Slater-type basis sets for the elements 1–118. *J. Comput. Chem.* **24**, 1142-1156 (2003).
- 23 C. Y. Legault, CYLview, 1.0b; Universitéde Sherbrooke: Québec, Montreal, Canada, 2009; <http://www.cylview.org>.
- 24 Humphrey, W., Dalke, A. & Schulten, K. VMD: Visual molecular dynamics. *J. Mol. Graphics* **14**, 33-38 (1996).
- 25 Ess, D. H. & Houk, K. N. Distortion/Interaction Energy Control of 1,3-Dipolar Cycloaddition Reactivity. *J. Am. Chem. Soc.* **129**, 10646-10647 (2007).
- 26 Legault, C. Y., Garcia, Y., Merlic, C. A. & Houk, K. N. Origin of Regioselectivity in Palladium-Catalyzed Cross-Coupling Reactions of Polyhalogenated Heterocycles. *J. Am. Chem. Soc.* **129**, 12664-12665 (2007).
- 27 Ess, D. H. & Houk, K. N. Theory of 1,3-Dipolar Cycloadditions: Distortion/Interaction and Frontier Molecular Orbital Models. *J. Am. Chem. Soc.* **130**, 10187-10198 (2008).
- 28 Hayden, A. E. & Houk, K. N. Transition State Distortion Energies Correlate with Activation Energies of 1,4-Dihydrogenations and Diels–Alder Cycloadditions of Aromatic Molecules. *J. Am. Chem. Soc.* **131**, 4084-4089 (2009).
- 29 Schoenebeck, F., Ess, D. H., Jones, G. O. & Houk, K. N. Reactivity and Regioselectivity in 1,3-Dipolar Cycloadditions of Azides to Strained Alkynes and Alkenes: A Computational Study. *J. Am. Chem. Soc.* **131**, 8121-8133 (2009).
