# Supplementary material for: Chiral phosphoric acid-catalyzed stereodivergent synthesis of trisubstituted allenes and computational mechanistic studies
Source: PubMed Central journal article supplement (PMC7608664; doi:10.1038/s41467-020-19294-8), 2020-11-02
Supplement: 41467_2020_19294_MOESM3_ESM.pdf [file 41467_2020_19294_MOESM3_ESM.pdf]

## Description of Additional Supplementary Files

File Name: Supplementary Data 1

Description: The cartesian coordinates for the optimized molecule structures
